# Supplementary material for: Fecal Metaproteomic Analysis Reveals Unique Changes of the Gut Microbiome Functions After Consumption of Sourdough Carasau Bread
Source: Front Microbiol. 2019 Jul 30;10:1733. doi: 10.3389/fmicb.2019.01733 (PMC6682701; doi:10.3389/fmicb.2019.01733)
Supplement: Supplementary file 3 [file Data_Sheet_3.xlsx]

## Sheet: ID table
Protein Accessions	BB_01	BB_02	BB_03	BB_04	SB_01	SB_02	SB_03	SB_04	chow_02	chow_03	chow_04	domain	phylum	class	order	family	genus	species	Protein names	Protein families	InterPro name	COG	Pathway	KO number	EC number
1_GL0005256	0	3	0	2	0	0	0	2	0	2	3	Bacteria	Firmicutes	Clostridia	Clostridiales	Lachnospiraceae	Anaerostipes	Anaerostipes caccae	Protein FixB	ETF alpha-subunit/FixB family	Electron transfer flavoprotein, alpha subunit	[C] Energy production and conversion
1_GL0019646	0	0	1	0	1	1	1	0	1	0	0	Bacteria	Proteobacteria	Gammaproteobacteria	Enterobacterales	Enterobacteriaceae			Chaperone protein ClpB	ClpA/ClpB family	Chaperonin ClpB			K03695
1_GL0035658	0	0	1	0	0	2	2	0	1	0	0	Bacteria	Proteobacteria	Gammaproteobacteria	Enterobacterales	Enterobacteriaceae			Outer membrane protein C (Outer membrane protein 1B) (Porin OmpC)	Gram-negative porin family	Porin, gammaproteobacterial	[M] Cell wall/membrane/envelope biogenesis		K09475
1_GL0037442	0	0	0	0	0	0	0	0	0	0	1	Bacteria	Firmicutes	Clostridia	Clostridiales	Lachnospiraceae
1_GL0040310	0	0	0	0	0	0	0	0	0	1	0	Bacteria	Proteobacteria	Gammaproteobacteria	Enterobacterales	Enterobacteriaceae			D-phenylhydantoinase (EC 3.5.2.-) (Hydantoin-utilizing enzyme HyuA)	Metallo-dependent hydrolases superfamily, Hydantoinase/dihydropyrimidinase family	D-phenylhydantoinase	[F] Nucleotide transport and metabolism		K01464	3.5.2.-
1_GL0042966	0	0	0	1	0	0	0	0	0	0	0								30S ribosomal protein S8	Universal ribosomal protein uS8 family	Ribosomal protein S8	[J] Translation, ribosomal structure and biogenesis		K02994
1_GL0045077	0	0	0	0	0	0	0	0	0	1	0
1_GL0054117	0	1	1	0	1	1	1	0	1	0	0	Bacteria	Bacteroidetes	Bacteroidia	Bacteroidales	Prevotellaceae	Prevotella	Prevotella sp. CAG:485	Outer membrane protein 40 (Omp40) (PG33)	OmpA family		[M] Cell wall/membrane/envelope biogenesis
1_GL0065763	0	0	1	0	0	0	0	0	2	0	0	Bacteria	Bacteroidetes	Bacteroidia	Bacteroidales				Pyruvate, phosphate dikinase (EC 2.7.9.1) (Pyruvate, orthophosphate dikinase)	PEP-utilizing enzyme family	Pyruvate, phosphate dikinase				2.7.9.1
1_GL0089382	1	0	0	0	0	0	0	0	0	0	0	Bacteria	Firmicutes	Clostridia	Clostridiales				Argininosuccinate synthase (EC 6.3.4.5) (Citrulline--aspartate ligase)	Argininosuccinate synthase family, Type 1 subfamily	Argininosuccinate synthase, type 1 subfamily	[E] Amino acid transport and metabolism	L-arginine biosynthesis	K01940	6.3.4.5
1_GL0107879	0	0	0	0	0	0	0	0	0	0	1	Bacteria	Firmicutes						Protein TolA					K03646
1_GL0114604	0	0	0	0	0	0	0	0	0	0	1	Bacteria	Firmicutes	Clostridia	Clostridiales	Lachnospiraceae	Lachnoclostridium		Flagellin	Bacterial flagellin family	Flagellin			K02406
10_GL0000536	0	0	0	0	0	0	0	0	0	0	1	Bacteria	Firmicutes	Clostridia	Clostridiales	Lachnospiraceae					Carbohydrate ABC transporter substrate-binding, CPR0540	[G] Carbohydrate transport and metabolism
10_GL0000676	1	0	0	0	0	0	0	0	0	0	0	Bacteria	Firmicutes						Branched-chain-amino-acid aminotransferase (BCAT) (EC 2.6.1.42)	Class-IV pyridoxal-phosphate-dependent aminotransferase family		[E] Amino acid transport and metabolism	L-isoleucine biosynthesis	K00826	2.6.1.42
10_GL0004544	0	0	0	0	0	0	0	1	0	0	0	Bacteria	Firmicutes						Putative uncharacterized transketolase family protein y4mN	Transketolase family				K00615
10_GL0006220	3	0	0	0	0	0	0	1	0	0	2	Bacteria	Firmicutes						60 kDa chaperonin (GroEL protein) (Protein Cpn60)	Chaperonin (HSP60) family		[O] Posttranslational modification, protein turnover, chaperones		K04077
10_GL0007956	0	0	0	0	0	0	0	0	0	1	0	Bacteria	Firmicutes	Clostridia	Clostridiales	Ruminococcaceae
10_GL0008936	0	0	0	0	1	0	0	0	0	0	0	Bacteria	Verrucomicrobia	Verrucomicrobiae	Verrucomicrobiales	Akkermansiaceae	Akkermansia
10_GL0009070	0	0	0	0	0	0	0	0	0	1	1	Bacteria	Firmicutes	Erysipelotrichia	Erysipelotrichales	Erysipelotrichaceae	Faecalibaculum	Faecalibaculum rodentium	N-acetylgalactosamine-specific phosphotransferase enzyme IIB component 1 (EC 2.7.1.-) (EIIB-Aga) (PTS system N-acetylgalactosamine-specific EIIB component 1)		Phosphotransferase system, sorbose subfamily IIB component, subgroup	[G] Carbohydrate transport and metabolism		K10984	2.7.1.-
10_GL0009337	0	0	0	0	0	0	0	0	0	0	1	Bacteria	Firmicutes						Glutamine synthetase (GS) (EC 6.3.1.2) (Glutamate--ammonia ligase) (Glutamine synthetase III) (GSIII)	Glutamine synthetase family		[E] Amino acid transport and metabolism			6.3.1.2
10_GL0009545	1	0	0	0	1	1	1	0	0	0	0	Bacteria	Firmicutes	Clostridia	Clostridiales		Flavonifractor		Phase 2 flagellin	Bacterial flagellin family	Flagellin	[N] Cell motility		K02406
10_GL0009928	0	1	0	1	0	0	1	1	0	1	1	Bacteria	Firmicutes	Clostridia	Clostridiales	Lachnospiraceae		Lachnospiraceae bacterium 10-1	Triosephosphate isomerase (TIM) (TPI) (EC 5.3.1.1) (Triose-phosphate isomerase)	Triosephosphate isomerase family		[G] Carbohydrate transport and metabolism	gluconeogenesis	K01803	5.3.1.1
10_GL0010122	0	0	0	1	0	0	0	0	0	0	0	Bacteria	Firmicutes	Clostridia	Clostridiales	Lachnospiraceae			Pyruvate, phosphate dikinase (EC 2.7.9.1) (Pyruvate, orthophosphate dikinase)	PEP-utilizing enzyme family	Pyruvate, phosphate dikinase	[G] Carbohydrate transport and metabolism			2.7.9.1
10_GL0010798	0	3	0	0	0	0	0	0	0	3	3	Bacteria	Firmicutes						Argininosuccinate synthase (EC 6.3.4.5) (Citrulline--aspartate ligase)	Argininosuccinate synthase family, Type 1 subfamily	Argininosuccinate synthase, type 1 subfamily	[E] Amino acid transport and metabolism	L-arginine biosynthesis	K01940	6.3.4.5
10_GL0013027	0	0	0	0	0	0	1	0	0	0	0	Bacteria	Bacteroidetes	Bacteroidia					30S ribosomal protein S3	Universal ribosomal protein uS3 family	Ribosomal protein S3, bacterial	[J] Translation, ribosomal structure and biogenesis		K02982
10_GL0013727	0	1	1	0	2	2	1	0	2	0	0	Bacteria	Bacteroidetes	Bacteroidia	Bacteroidales				50S ribosomal protein L19	Bacterial ribosomal protein bL19 family	Ribosomal protein L19	[J] Translation, ribosomal structure and biogenesis		K02884
10_GL0015269	0	0	0	0	1	2	2	1	0	0	0	Bacteria	Bacteroidetes	Bacteroidia	Bacteroidales	Prevotellaceae	Prevotella	Prevotella sp. CAG:1031			Outer membrane protein SusF/SusE
10_GL0015619	0	0	0	0	0	0	0	0	2	0	0	Bacteria	Firmicutes						B-type flagellin	Bacterial flagellin family	Flagellin	[N] Cell motility		K02406
10_GL0016214	0	0	0	0	0	1	1	0	0	0	0	Bacteria	Bacteroidetes	Bacteroidia	Bacteroidales	Prevotellaceae	Prevotella	Prevotella sp. CAG:485	Probable zinc protease PqqL (EC 3.4.24.-)	Peptidase M16 family				K07263	3.4.24.-
10_GL0016465	0	0	0	1	0	0	0	0	0	0	0	Bacteria	Firmicutes	Clostridia	Clostridiales	Lachnospiraceae		Lachnospiraceae bacterium 10-1				[G] Carbohydrate transport and metabolism
10_GL0016604	0	0	0	1	0	0	0	0	0	0	0	Bacteria	Firmicutes	Clostridia	Clostridiales	Lachnospiraceae		Lachnospiraceae bacterium 10-1	High-affinity branched-chain amino acid transport ATP-binding protein LivF (LIV-I protein F)	ABC transporter superfamily	High-affinity branched-chain amino acid transport ATP-binding protein	[E] Amino acid transport and metabolism		K01996
10_GL0017831	1	2	1	1	1	1	1	1	1	2	1	Bacteria	Firmicutes	Clostridia	Clostridiales				30S ribosomal protein S2	Universal ribosomal protein uS2 family	Ribosomal protein S2, bacteria/mitochondria/plastid	[J] Translation, ribosomal structure and biogenesis		K02967
10_GL0018481	0	0	0	0	0	0	0	0	0	1	0	Bacteria	Firmicutes	Clostridia	Clostridiales							[C] Energy production and conversion
10_GL0021589	0	1	0	1	0	0	0	0	0	0	0	Bacteria	Firmicutes	Clostridia	Clostridiales				50S ribosomal protein L27	Bacterial ribosomal protein bL27 family	Ribosomal protein L27	[J] Translation, ribosomal structure and biogenesis		K02899
10_GL0021636	0	0	0	0	0	0	0	0	0	0	1	Bacteria	Firmicutes	Clostridia	Clostridiales							[C] Energy production and conversion
10_GL0022025	3	4	1	3	2	2	2	3	1	3	3	Bacteria	Firmicutes	Clostridia	Clostridiales				Elongation factor Tu (EF-Tu)	TRAFAC class translation factor GTPase superfamily, Classic translation factor GTPase family, EF-Tu/EF-1A subfamily	Translation elongation factor EFTu/EF1A, bacterial/organelle	[J] Translation, ribosomal structure and biogenesis		K02358
10_GL0022917	0	0	0	0	0	2	0	0	0	0	0	Bacteria	Bacteroidetes	Bacteroidia	Bacteroidales			Bacteroidales bacterium 52_46	Bifunctional aspartate aminotransferase and L-aspartate beta-decarboxylase (EC 2.6.1.1) (EC 4.1.1.12) (Aspartate 4-decarboxylase) (ASD) (AsdA)	Class-I pyridoxal-phosphate-dependent aminotransferase family		[E] Amino acid transport and metabolism			2.6.1.1
10_GL0023036	0	0	0	0	0	1	0	0	0	0	0	Bacteria	Bacteroidetes	Bacteroidia	Bacteroidales				DNA-directed RNA polymerase subunit alpha (RNAP subunit alpha) (EC 2.7.7.6) (RNA polymerase subunit alpha) (Transcriptase subunit alpha)	RNA polymerase alpha chain family	DNA-directed RNA polymerase, alpha subunit	[K] Transcription		K03040	2.7.7.6
10_GL0023047	0	0	0	1	0	0	0	0	0	0	0	Bacteria	Firmicutes	Clostridia	Clostridiales	Lachnospiraceae		Lachnospiraceae bacterium 10-1	Probable starch degradation products transport system permease protein AmyD	Binding-protein-dependent transport system permease family, MalFG subfamily		[P] Inorganic ion transport and metabolism
10_GL0023048	0	0	0	2	0	1	0	0	0	0	1	Bacteria	Firmicutes	Clostridia	Clostridiales	Lachnospiraceae		Lachnospiraceae bacterium 10-1				[G] Carbohydrate transport and metabolism
10_GL0023280	0	1	0	1	0	1	1	1	1	1	1	Bacteria	Firmicutes	Clostridia	Clostridiales				D-galactose-binding periplasmic protein (GBP) (D-galactose/ D-glucose-binding protein) (GGBP)	Bacterial solute-binding protein 2 family
10_GL0023489	0	0	0	0	0	0	0	0	0	0	1	Bacteria	Firmicutes	Clostridia	Clostridiales				Inosine-5'-monophosphate dehydrogenase (IMP dehydrogenase) (IMPD) (IMPDH) (EC 1.1.1.205) (Superoxide-inducible protein 12) (SOI12)	IMPDH/GMPR family	Inosine-5'-monophosphate dehydrogenase		XMP biosynthesis via de novo pathway	K00088	1.1.1.205
10_GL0023722	1	0	0	0	0	0	0	1	0	0	1	Bacteria	Firmicutes
10_GL0024132	0	0	0	0	0	0	0	0	0	0	1	Bacteria	Firmicutes	Clostridia	Clostridiales				Probable transaldolase (EC 2.2.1.2)	Transaldolase family, Type 3B subfamily		[G] Carbohydrate transport and metabolism	pentose phosphate pathway	K00616	2.2.1.2
10_GL0024532	0	0	1	0	0	1	2	2	4	0	0	Bacteria	Firmicutes	Erysipelotrichia	Erysipelotrichales	Erysipelotrichaceae	Faecalibaculum	Faecalibaculum rodentium
10_GL0024533	0	0	0	0	0	0	0	0	1	0	0	Bacteria	Firmicutes	Erysipelotrichia	Erysipelotrichales	Erysipelotrichaceae	Faecalibaculum	Faecalibaculum rodentium
10_GL0024724	1	0	0	0	0	0	0	0	0	0	0	Bacteria	Firmicutes						Probable M18 family aminopeptidase 1 (EC 3.4.11.-)	Peptidase M18 family	Peptidase M18				3.4.11.-
10_GL0025173	0	0	0	0	0	1	0	0	0	0	0	Bacteria	Bacteroidetes	Bacteroidia	Bacteroidales	Bacteroidaceae			Pyrophosphate--fructose 6-phosphate 1-phosphotransferase (EC 2.7.1.90) (6-phosphofructokinase, pyrophosphate dependent) (PPi-dependent phosphofructokinase) (PPi-PFK) (Pyrophosphate-dependent 6-phosphofructose-1-kinase)	Phosphofructokinase type A (PFKA) family, PPi-dependent PFK group II subfamily, Clade "Long" sub-subfamily	ATP-dependent 6-phosphofructokinase	[G] Carbohydrate transport and metabolism	glycolysis		2.7.1.90
10_GL0025515	0	5	0	0	3	2	0	1	0	0	0	Bacteria	Bacteroidetes	Bacteroidia	Bacteroidales	Bacteroidaceae	Bacteroides	Bacteroides vulgatus
10_GL0025698	1	2	0	3	0	0	0	1	0	3	4	Bacteria	Firmicutes	Clostridia	Clostridiales				Formate acetyltransferase (EC 2.3.1.54) (Pyruvate formate-lyase)		Formate acetyltransferase	[C] Energy production and conversion	pyruvate fermentation	K00656	2.3.1.54
10_GL0025717	3	2	1	2	1	0	1	3	0	4	3	Bacteria	Firmicutes						ATP synthase subunit beta (EC 3.6.3.14) (ATP synthase F1 sector subunit beta) (F-ATPase subunit beta)	ATPase alpha/beta chains family	ATPase, F1 complex, beta subunit	[C] Energy production and conversion		K02112	3.6.3.14
10_GL0025758	0	2	0	2	0	0	0	1	0	2	2	Bacteria	Firmicutes	Clostridia	Clostridiales							[G] Carbohydrate transport and metabolism
10_GL0026162	0	0	0	1	0	0	0	0	0	1	0	Bacteria	Firmicutes	Clostridia	Clostridiales	Lachnospiraceae			Pyrophosphate--fructose 6-phosphate 1-phosphotransferase (EC 2.7.1.90) (6-phosphofructokinase, pyrophosphate dependent) (PPi-dependent phosphofructokinase) (PPi-PFK) (Pyrophosphate-dependent 6-phosphofructose-1-kinase)	Phosphofructokinase type A (PFKA) family, PPi-dependent PFK group II subfamily, Clade "B2" sub-subfamily	ATP-dependent 6-phosphofructokinase	[G] Carbohydrate transport and metabolism	glycolysis	K21071	2.7.1.90
10_GL0027701	0	0	0	2	0	0	0	0	0	1	0	Bacteria	Firmicutes	Clostridia	Clostridiales	Lachnospiraceae			Galactose/methyl galactoside import ATP-binding protein MglA (EC 3.6.3.17)	ABC transporter superfamily, Galactose/methyl galactoside importer (TC 3.A.1.2.3) family	ABC transporter, galactose import, MglA			K10542	3.6.3.17
10_GL0029374	0	0	0	0	1	0	0	0	0	0	0	Bacteria	Verrucomicrobia	Verrucomicrobiae	Verrucomicrobiales	Akkermansiaceae	Akkermansia	Akkermansia muciniphila	Methylmalonyl-CoA carboxyltransferase 12S subunit (EC 2.1.3.1) (Transcarboxylase 12S subunit)		Acetyl-CoA carboxylase carboxyl transferase, beta subunit	[I] Lipid transport and metabolism			2.1.3.1
10_GL0030247	0	0	0	0	1	2	2	2	0	0	0	Bacteria	Bacteroidetes	Bacteroidia	Bacteroidales	Bacteroidaceae	Bacteroides	Bacteroides pyogenes	TonB-dependent receptor SusC (Starch-utilization system protein C)	TonB-dependent receptor family			starch degradation	K21573
10_GL0030306	1	0	1	0	1	0	1	1	2	1	1	Bacteria	Firmicutes						50S ribosomal protein L7/L12	Bacterial ribosomal protein bL12 family	Ribosomal protein L7/L12	[J] Translation, ribosomal structure and biogenesis		K02935
10_GL0031427	0	0	0	0	0	0	0	0	0	0	1	Bacteria	Firmicutes	Clostridia	Clostridiales	Eubacteriaceae	Eubacterium	Eubacterium plexicaudatum	Tryptophan synthase beta chain 2 (EC 4.2.1.20)	TrpB family	Tryptophan synthase beta chain/beta chain-like	[E] Amino acid transport and metabolism	L-tryptophan biosynthesis	K06001	4.2.1.20
10_GL0031924	1	0	0	0	1	1	1	1	0	1	1	Bacteria	Firmicutes	Clostridia	Clostridiales				Reverse rubrerythrin-1 (revRbr 1) (NADH peroxidase) (NPXase) (Npx) (EC 1.11.1.1) (Rubperoxin 1) (Rpr 1)			[C] Energy production and conversion			1.11.1.1
10_GL0032930	0	1	0	0	0	0	0	1	0	0	1	Bacteria	Firmicutes						50S ribosomal protein L7/L12	Bacterial ribosomal protein bL12 family	Ribosomal protein L7/L12	[J] Translation, ribosomal structure and biogenesis		K02935
10_GL0033203	0	0	0	0	0	0	1	0	0	0	0	Bacteria	Bacteroidetes	Bacteroidia	Bacteroidales				Glucose-6-phosphate isomerase (GPI) (EC 5.3.1.9) (Phosphoglucose isomerase) (PGI) (Phosphohexose isomerase) (PHI)	GPI family	Phosphoglucose isomerase (PGI)	[G] Carbohydrate transport and metabolism	gluconeogenesis	K01810	5.3.1.9
10_GL0033944	1	0	0	1	2	3	4	2	0	1	0	Bacteria	Bacteroidetes	Bacteroidia	Bacteroidales
10_GL0034671	2	2	0	1	0	0	0	1	0	2	2	Bacteria	Firmicutes						Formate acetyltransferase (EC 2.3.1.54) (Pyruvate formate-lyase)			[C] Energy production and conversion	pyruvate fermentation	K00656	2.3.1.54
10_GL0035714	0	0	0	2	0	0	0	0	0	0	0	Bacteria	Firmicutes	Clostridia	Clostridiales	Lachnospiraceae
10_GL0037010	0	0	0	1	0	0	0	0	0	0	0	Bacteria	Firmicutes	Clostridia	Clostridiales	Lachnospiraceae		Lachnospiraceae bacterium 10-1	Uncharacterized ABC transporter extracellular-binding protein YurO	Bacterial solute-binding protein 1 family		[G] Carbohydrate transport and metabolism		K10117
10_GL0038449	2	0	0	0	0	0	0	0	0	1	2	Bacteria	Firmicutes						Pyrophosphate--fructose 6-phosphate 1-phosphotransferase (EC 2.7.1.90) (6-phosphofructokinase, pyrophosphate dependent) (PPi-dependent phosphofructokinase) (PPi-PFK) (Pyrophosphate-dependent 6-phosphofructose-1-kinase)	Phosphofructokinase type A (PFKA) family, PPi-dependent PFK group II subfamily, Clade "B2" sub-subfamily	ATP-dependent 6-phosphofructokinase	[G] Carbohydrate transport and metabolism	glycolysis	K21071	2.7.1.90
10_GL0040332	0	1	0	0	0	0	0	0	0	0	0	Bacteria	Firmicutes	Clostridia	Clostridiales				30S ribosomal protein S5	Universal ribosomal protein uS5 family	Ribosomal protein S5, bacterial-type	[J] Translation, ribosomal structure and biogenesis		K02988
10_GL0040609	0	0	0	1	1	2	1	0	1	0	0	Bacteria	Bacteroidetes	Bacteroidia	Bacteroidales				50S ribosomal protein L1	Universal ribosomal protein uL1 family	Ribosomal protein L1/ribosomal biogenesis protein	[J] Translation, ribosomal structure and biogenesis		K02863
10_GL0040625	0	0	0	0	0	0	0	2	0	0	0	Bacteria	Firmicutes						Transketolase (TK) (EC 2.2.1.1)	Transketolase family		[G] Carbohydrate transport and metabolism		K00615	2.2.1.1
10_GL0040780	2	1	0	3	0	0	0	1	0	2	3	Bacteria	Firmicutes	Clostridia	Clostridiales	Lachnospiraceae			Electron transfer flavoprotein subunit beta (Beta-ETF) (Electron transfer flavoprotein small subunit) (ETFSS)	ETF beta-subunit/FixA family	Electron transfer flavoprotein, beta subunit	[C] Energy production and conversion		K03521
10_GL0040804	0	0	0	1	0	0	0	0	0	0	0	Bacteria	Firmicutes	Clostridia	Clostridiales	Lachnospiraceae		Lachnospiraceae bacterium 10-1	Putative sensory transducer protein		Chemotaxis methyl-accepting receptor			K03406
10_GL0044588	1	2	0	1	0	1	1	3	1	0	0	Bacteria	Firmicutes	Erysipelotrichia	Erysipelotrichales	Erysipelotrichaceae	Faecalibaculum	Faecalibaculum rodentium	Rubrerythrin-1 (Rr 1) (NADH peroxidase) (NPXase) (Npx) (EC 1.11.1.1)			[C] Energy production and conversion			1.11.1.1
10_GL0044929	0	2	0	1	2	0	0	0	1	2	2	Bacteria	Firmicutes	Clostridia	Clostridiales				L-lactate dehydrogenase 1 (L-LDH 1) (EC 1.1.1.27)	LDH/MDH superfamily, LDH family	L-lactate dehydrogenase	[C] Energy production and conversion	pyruvate fermentation to lactate	K00016	1.1.1.27
10_GL0045430	0	0	0	4	0	0	0	0	0	0	0	Bacteria	Firmicutes	Clostridia	Clostridiales	Lachnospiraceae			Protein CotJC	Manganese catalase family		[P] Inorganic ion transport and metabolism		K06334
10_GL0045886	1	1	0	1	0	0	0	1	0	0	0	Bacteria	Firmicutes	Clostridia	Clostridiales	Lachnospiraceae			Chemotaxis protein CheW (Coupling protein CheW)					K03408
10_GL0045887	0	1	0	1	0	0	0	1	0	1	1	Bacteria	Firmicutes	Clostridia	Clostridiales				Chemotaxis protein CheA (EC 2.7.13.3)					K03407	2.7.13.3
10_GL0046240	0	0	0	0	0	2	1	0	0	0	0	Bacteria							Urease subunit beta 2 (EC 3.5.1.5) (Urea amidohydrolase subunit beta 2)	Urease beta subunit family		[E] Amino acid transport and metabolism	urea degradation	K01429	3.5.1.5
10_GL0048121	0	0	0	0	0	0	0	0	0	0	1	Bacteria	Firmicutes	Clostridia	Clostridiales				PTS system N-acetylglucosamine-specific EIICB component (EIICB-Nag) [Includes: N-acetylglucosamine permease IIC component (PTS system N-acetylglucosamine-specific EIIC component); N-acetylglucosamine-specific phosphotransferase enzyme IIB component (EC 2.7.1.-) (PTS system N-acetylglucosamine-specific EIIB component)]			[G] Carbohydrate transport and metabolism		K02803	2.7.1.-
10_GL0048653	0	0	0	0	0	0	0	0	0	1	0	Bacteria	Firmicutes	Clostridia	Clostridiales	Lachnospiraceae	Roseburia	Roseburia hominis	Triosephosphate isomerase (TIM) (TPI) (EC 5.3.1.1) (Triose-phosphate isomerase)	Triosephosphate isomerase family	Triosephosphate isomerase, bacterial/eukaryotic	[G] Carbohydrate transport and metabolism	gluconeogenesis	K01803	5.3.1.1
10_GL0051260	0	0	0	0	0	0	0	0	0	0	1	Bacteria	Firmicutes	Erysipelotrichia	Erysipelotrichales	Erysipelotrichaceae	Faecalibaculum	Faecalibaculum rodentium	D-galactose-binding periplasmic protein (GBP) (D-galactose/ D-glucose-binding protein) (GGBP)	Bacterial solute-binding protein 2 family		[G] Carbohydrate transport and metabolism		K10540
10_GL0052012	0	0	0	0	0	0	1	0	0	0	0	Bacteria	Bacteroidetes	Bacteroidia	Bacteroidales	Prevotellaceae	Prevotella	Prevotella sp. CAG:485	Efflux pump periplasmic linker BepF	Membrane fusion protein (MFP) (TC 8.A.1) family				K03585
10_GL0053243	0	0	0	0	1	0	0	0	0	0	0	Bacteria	Bacteroidetes	Bacteroidia	Bacteroidales				Fumarate hydratase class I, anaerobic (EC 4.2.1.2) (D-tartrate dehydratase) (EC 4.2.1.81) (Fumarase B)	Class-I fumarase family	Iron-dependent fumarate hydratase	[C] Energy production and conversion		K01676	4.2.1.2
10_GL0053245	0	0	0	0	0	1	1	0	0	0	0	Bacteria	Bacteroidetes	Bacteroidia	Bacteroidales						Polysaccharide export protein	[M] Cell wall/membrane/envelope biogenesis
10_GL0053259	1	0	2	1	1	6	1	1	0	0	0	Bacteria	Bacteroidetes	Bacteroidia	Bacteroidales				NAD-specific glutamate dehydrogenase (NAD-GDH) (EC 1.4.1.2) (NADH-dependent glutamate dehydrogenase)	Glu/Leu/Phe/Val dehydrogenases family	Glutamate dehydrogenase	[E] Amino acid transport and metabolism		K00262	1.4.1.2
10_GL0054899	2	1	1	2	3	1	2	2	1	5	4	Bacteria	Firmicutes	Bacilli	Lactobacillales	Lactobacillaceae	Lactobacillus		Fructose-bisphosphate aldolase (FBP aldolase) (FBPA) (EC 4.1.2.13) (Fructose-1,6-bisphosphate aldolase)	Class II fructose-bisphosphate aldolase family	Fructose-1,6-bisphosphate aldolase, class 2	[G] Carbohydrate transport and metabolism	glycolysis	K01624	4.1.2.13
10_GL0054957	0	0	0	0	0	0	1	0	0	0	0	Bacteria	Bacteroidetes	Bacteroidia	Bacteroidales	Bacteroidaceae	Bacteroides	Bacteroides uniformis
10_GL0054958	0	0	0	0	0	1	2	0	0	0	0	Bacteria	Bacteroidetes	Bacteroidia	Bacteroidales	Bacteroidaceae	Bacteroides	Bacteroides uniformis	Outer membrane protein 40 (Omp40) (PG33)	OmpA family		[M] Cell wall/membrane/envelope biogenesis
10_GL0055487	0	0	0	0	0	1	1	0	0	1	1	Bacteria	Bacteroidetes	Bacteroidia	Bacteroidales	Rikenellaceae	Alistipes		50S ribosomal protein L7/L12	Bacterial ribosomal protein bL12 family	Ribosomal protein L7/L12	[J] Translation, ribosomal structure and biogenesis		K02935
10_GL0056160	0	0	0	0	0	0	0	0	2	0	0	Bacteria	Bacteroidetes	Bacteroidia	Bacteroidales	Prevotellaceae	Prevotella	Prevotella ruminicola	Fructose-bisphosphate aldolase (FBP aldolase) (FBPA) (EC 4.1.2.13) (Fructose-1,6-bisphosphate aldolase)	Class II fructose-bisphosphate aldolase family	Fructose-1,6-bisphosphate aldolase, class 2	[G] Carbohydrate transport and metabolism	glycolysis	K01624	4.1.2.13
10_GL0056357	0	3	1	2	1	1	2	0	2	0	0	Bacteria							50S ribosomal protein L15	Universal ribosomal protein uL15 family		[J] Translation, ribosomal structure and biogenesis		K02876
10_GL0058065	0	1	0	0	0	0	0	0	0	0	1	Bacteria	Firmicutes	Clostridia	Clostridiales						Phosphoenolpyruvate carboxykinase, ATP-utilising	[C] Energy production and conversion
10_GL0059710	0	1	0	1	0	0	0	0	0	0	1	Bacteria	Firmicutes	Clostridia	Clostridiales	Lachnospiraceae			30S ribosomal protein S4	Universal ribosomal protein uS4 family	Ribosomal protein S4/S9	[J] Translation, ribosomal structure and biogenesis		K02986
10_GL0059862	0	0	0	0	0	0	1	0	0	0	0	Bacteria	Bacteroidetes	Bacteroidia	Bacteroidales				Chaperone protein DnaK (HSP70) (Heat shock 70 kDa protein) (Heat shock protein 70)	Heat shock protein 70 family	Heat shock protein 70 family	[O] Posttranslational modification, protein turnover, chaperones		K04043
10_GL0059997	1	0	0	0	0	0	0	1	0	0	0	Bacteria	Firmicutes	Clostridia	Clostridiales	Lachnospiraceae			Putative sensory transducer protein		Chemotaxis methyl-accepting receptor			K03406
10_GL0060203	0	0	0	0	0	1	0	0	0	0	0	Bacteria	Bacteroidetes	Bacteroidia	Bacteroidales	Bacteroidaceae	Bacteroides	Bacteroides sp. CAG:927				[P] Inorganic ion transport and metabolism
10_GL0061008	0	0	1	0	0	0	0	0	0	0	0	Bacteria	Firmicutes	Clostridia	Clostridiales				30S ribosomal protein S6	Bacterial ribosomal protein bS6 family	Ribosomal protein S6, plastid/chloroplast	[J] Translation, ribosomal structure and biogenesis		K02990
10_GL0061287	0	0	0	0	0	2	3	0	0	0	0	Bacteria	Bacteroidetes	Bacteroidia	Bacteroidales	Prevotellaceae	Prevotella	Prevotella sp. CAG:485
10_GL0061596	0	0	1	0	0	0	0	0	0	0	0	Bacteria	Bacteroidetes	Bacteroidia	Bacteroidales	Prevotellaceae	Prevotella		Glucose-6-phosphate isomerase (GPI) (EC 5.3.1.9) (Phosphoglucose isomerase) (PGI) (Phosphohexose isomerase) (PHI)	GPI family	Phosphoglucose isomerase (PGI)		gluconeogenesis	K01810	5.3.1.9
10_GL0061618	0	0	0	0	0	2	1	0	0	0	0	Bacteria	Bacteroidetes	Bacteroidia	Bacteroidales	Bacteroidaceae	Bacteroides	Bacteroides uniformis	Outer membrane porin F	OmpA family				K03286
10_GL0061623	0	0	1	0	0	1	2	0	0	0	0	Bacteria	Bacteroidetes	Bacteroidia	Bacteroidales	Bacteroidaceae	Bacteroides	Bacteroides uniformis				[P] Inorganic ion transport and metabolism
10_GL0063655	0	0	0	0	0	1	1	0	0	0	0	Bacteria	Bacteroidetes	Bacteroidia	Bacteroidales	Prevotellaceae	Prevotella		Trigger factor (TF) (EC 5.2.1.8) (PPIase)	FKBP-type PPIase family, Tig subfamily	Trigger factor	[O] Posttranslational modification, protein turnover, chaperones		K03545	5.2.1.8
10_GL0064476	0	0	0	1	0	0	0	0	0	0	0	Bacteria	Firmicutes	Clostridia	Clostridiales	Lachnospiraceae		Lachnospiraceae bacterium 10-1				[G] Carbohydrate transport and metabolism
10_GL0065677	0	0	0	0	0	0	0	0	1	0	0	Bacteria	Firmicutes	Erysipelotrichia	Erysipelotrichales	Erysipelotrichaceae			Fructose-bisphosphate aldolase (FBP aldolase) (FBPA) (EC 4.1.2.13) (Fructose-1,6-bisphosphate aldolase)	Class II fructose-bisphosphate aldolase family	Fructose-1,6-bisphosphate aldolase, class 2	[G] Carbohydrate transport and metabolism	glycolysis	K01624	4.1.2.13
10_GL0066022	1	0	0	0	0	0	0	0	0	0	1	Bacteria	Firmicutes	Clostridia	Clostridiales	Ruminococcaceae	Ruminococcus	Ruminococcus albus
10_GL0066033	2	1	0	0	0	0	0	1	0	2	2	Bacteria	Firmicutes	Clostridia	Clostridiales	Lachnospiraceae					Peptidase M3B, oligoendopeptidase-related clade 2	[E] Amino acid transport and metabolism
10_GL0066481	0	0	0	1	0	0	0	0	0	0	0	Bacteria	Firmicutes	Clostridia	Clostridiales				Probable ABC transporter permease protein YtcP	Binding-protein-dependent transport system permease family, CysTW subfamily		[G] Carbohydrate transport and metabolism		K17320
10_GL0067960	0	0	0	0	0	0	0	0	0	0	1	Bacteria	Firmicutes	Clostridia	Clostridiales				Elongation factor Ts (EF-Ts)	EF-Ts family	Translation elongation factor EFTs/EF1B	[J] Translation, ribosomal structure and biogenesis		K02357
10_GL0068029	0	1	0	0	0	0	0	0	0	0	0	Bacteria	Firmicutes						4-hydroxy-3-methylbut-2-enyl diphosphate reductase (HMBPP reductase) (EC 1.17.7.4)	IspH family	Ribosomal protein S1	[J] Translation, ribosomal structure and biogenesis	dimethylallyl diphosphate biosynthesis	K02945	1.17.7.4
10_GL0070621	2	0	0	0	0	0	0	1	0	2	1	Bacteria	Firmicutes	Clostridia	Clostridiales	Lachnospiraceae	Roseburia		Acyl-CoA dehydrogenase, short-chain specific (EC 1.3.8.1) (Butyryl-CoA dehydrogenase) (SCAD)	Acyl-CoA dehydrogenase family		[I] Lipid transport and metabolism	butanoate metabolism	K00248	1.3.8.1
10_GL0070624	1	1	0	0	0	0	0	1	0	0	1	Bacteria	Firmicutes						Acetyl-CoA acetyltransferase (EC 2.3.1.9) (Acetoacetyl-CoA thiolase)	Thiolase family		[I] Lipid transport and metabolism	(R)-mevalonate biosynthesis	K00626	2.3.1.9
10_GL0072819	0	0	0	1	0	0	0	0	0	0	0	Bacteria	Bacteroidetes	Bacteroidia	Bacteroidales				Purine nucleoside phosphorylase 1 (PNP 1) (EC 2.4.2.1) (Inosine phosphorylase) (Inosine-guanosine phosphorylase) (Purine nucleoside phosphorylase I) (PNP I) (Pu-NPase I)	PNP/MTAP phosphorylase family	Purine nucleoside phosphorylase I, inosine/guanosine-specific	[F] Nucleotide transport and metabolism	purine nucleoside salvage	K03783	2.4.2.1
10_GL0073013	0	0	0	2	0	0	0	1	0	2	0	Bacteria	Firmicutes						Pyruvate, phosphate dikinase (EC 2.7.9.1) (Pyruvate, orthophosphate dikinase)	PEP-utilizing enzyme family	Pyruvate, phosphate dikinase	[G] Carbohydrate transport and metabolism			2.7.9.1
10_GL0074268	3	0	0	0	0	0	0	0	0	0	4	Bacteria	Firmicutes	Clostridia	Clostridiales	Lachnospiraceae
10_GL0075006	0	0	0	0	0	1	1	0	0	0	0	Bacteria	Bacteroidetes	Bacteroidia	Bacteroidales	Prevotellaceae	Paraprevotella		Pyruvate-flavodoxin oxidoreductase (EC 1.2.7.-)	NifJ family	Pyruvate-flavodoxin oxidoreductase	[C] Energy production and conversion			1.2.7.-
10_GL0077407	0	1	0	1	0	0	0	1	0	0	1	Bacteria	Firmicutes						30S ribosomal protein S8	Universal ribosomal protein uS8 family	Ribosomal protein S8	[J] Translation, ribosomal structure and biogenesis		K02994
10_GL0077484	0	1	0	0	1	0	0	0	0	0	0
10_GL0077725	1	1	0	1	0	3	3	3	4	1	2	Bacteria	Firmicutes	Erysipelotrichia	Erysipelotrichales	Erysipelotrichaceae	Faecalibaculum	Faecalibaculum rodentium
10_GL0079746	1	0	0	0	0	0	1	0	0	0	0	Bacteria	Bacteroidetes	Bacteroidia	Bacteroidales	Prevotellaceae	Prevotella	Prevotella sp. CAG:485	Phosphoglucomutase (PGM) (EC 5.4.2.2) (Alpha-phosphoglucomutase) (Glucose phosphomutase)	Phosphohexose mutase family		[G] Carbohydrate transport and metabolism	diglucosyl-diacylglycerol biosynthesis	K01835	5.4.2.2
10_GL0081634	0	0	0	0	0	0	0	0	1	0	0	Bacteria	Firmicutes	Erysipelotrichia	Erysipelotrichales	Erysipelotrichaceae	Faecalibaculum	Faecalibaculum rodentium	50S ribosomal protein L10	Universal ribosomal protein uL10 family	Ribosomal protein L10	[J] Translation, ribosomal structure and biogenesis		K02864
10_GL0082417	3	1	1	0	0	0	0	1	0	2	1	Bacteria	Firmicutes	Clostridia	Clostridiales							[G] Carbohydrate transport and metabolism
10_GL0083374	3	2	1	3	2	3	2	4	4	6	2	Bacteria	Firmicutes						Glyceraldehyde-3-phosphate dehydrogenase (GAPDH) (EC 1.2.1.12) (CP 17/CP 18) (NAD-dependent glyceraldehyde-3-phosphate dehydrogenase)	Glyceraldehyde-3-phosphate dehydrogenase family	Glyceraldehyde/Erythrose phosphate dehydrogenase family	[G] Carbohydrate transport and metabolism	glycolysis		1.2.1.12
10_GL0088139	0	1	0	1	1	1	1	0	0	1	1	Bacteria	Firmicutes	Clostridia	Clostridiales	Lachnospiraceae			Flagellin	Bacterial flagellin family	Flagellin	[N] Cell motility		K02406
10_GL0088671	2	0	0	0	0	0	0	0	0	0	0	Bacteria	Bacteroidetes	Bacteroidia	Bacteroidales						Myo-inositol-1-phosphate synthase	[I] Lipid transport and metabolism
10_GL0089185	0	0	0	0	1	0	0	0	0	0	0	Bacteria	Verrucomicrobia	Verrucomicrobiae	Verrucomicrobiales	Akkermansiaceae	Akkermansia	Akkermansia muciniphila	Fructose-bisphosphate aldolase (FBP aldolase) (FBPA) (EC 4.1.2.13) (Fructose-1,6-bisphosphate aldolase)	Class II fructose-bisphosphate aldolase family	Fructose-bisphosphate aldolase, class II, yeast/E. coli subtype	[G] Carbohydrate transport and metabolism	glycolysis	K01624	4.1.2.13
10_GL0089294	0	0	0	1	0	0	0	0	0	0	0	Bacteria	Firmicutes	Clostridia	Clostridiales	Lachnospiraceae		Lachnospiraceae bacterium 10-1	N-acetylglucosamine-6-phosphate deacetylase (GlcNAc 6-P deacetylase) (EC 3.5.1.25)	Metallo-dependent hydrolases superfamily, NagA family	N-acetylglucosamine-6-phosphate deacetylase	[G] Carbohydrate transport and metabolism	N-acetylneuraminate degradation	K01443	3.5.1.25
10_GL0089539	1	0	0	0	0	0	0	0	0	0	2	Bacteria	Firmicutes						Methyl-accepting chemotaxis protein TlpC		Chemotaxis methyl-accepting receptor			K03406
10_GL0089581	0	0	0	0	0	0	0	0	0	1	0	Bacteria	Firmicutes						Xylulose kinase (Xylulokinase) (EC 2.7.1.17)	FGGY kinase family	Xylulokinase	[G] Carbohydrate transport and metabolism		K00854	2.7.1.17
10_GL0090845	0	0	0	0	0	2	0	0	0	1	1	Bacteria	Firmicutes						Pyruvate-flavodoxin oxidoreductase (EC 1.2.7.-)	NifJ family	Pyruvate-flavodoxin oxidoreductase	[C] Energy production and conversion			1.2.7.-
10_GL0092003	0	0	0	0	0	1	0	0	0	0	0	Bacteria	Bacteroidetes	Bacteroidia	Bacteroidales	Bacteroidaceae	Bacteroides		Triosephosphate isomerase (TIM) (TPI) (EC 5.3.1.1) (Triose-phosphate isomerase)	Triosephosphate isomerase family	Triosephosphate isomerase, bacterial/eukaryotic	[G] Carbohydrate transport and metabolism	gluconeogenesis	K01803	5.3.1.1
10_GL0092164	2	0	0	0	0	0	0	0	0	0	2	Bacteria	Firmicutes						Phosphoglucomutase (PGM) (EC 5.4.2.2) (Alpha-phosphoglucomutase) (Glucose phosphomutase)	Phosphohexose mutase family		[G] Carbohydrate transport and metabolism	diglucosyl-diacylglycerol biosynthesis	K01835	5.4.2.2
10_GL0092618	0	0	0	2	0	1	1	0	0	0	0	Bacteria	Bacteroidetes						Phosphoserine aminotransferase (EC 2.6.1.52) (Phosphohydroxythreonine aminotransferase) (PSAT)	Class-V pyridoxal-phosphate-dependent aminotransferase family, SerC subfamily	Phosphoserine aminotransferase	[E] Amino acid transport and metabolism	L-serine biosynthesis	K00831	2.6.1.52
10_GL0092657	0	0	5	0	0	0	0	0	0	0	0	Bacteria	Firmicutes	Clostridia	Clostridiales	Lachnospiraceae		Lachnospiraceae bacterium A4
10_GL0092663	0	0	1	1	0	0	0	0	0	0	0	Bacteria	Firmicutes	Clostridia
10_GL0093677	1	0	0	0	0	0	0	0	0	0	0	Bacteria	Firmicutes						Chemotaxis protein CheV					K03415
10_GL0096491	1	1	1	0	1	1	1	1	1	1	1	Bacteria	Bacteroidetes	Bacteroidia	Bacteroidales				30S ribosomal protein S7	Universal ribosomal protein uS7 family	Ribosomal protein S7, bacterial/organellar-type	[J] Translation, ribosomal structure and biogenesis		K02992
10_GL0097859	0	1	1	1	1	1	1	0	1	1	0	Bacteria	Bacteroidetes	Bacteroidia	Bacteroidales	Bacteroidaceae	Bacteroides		ATP synthase subunit c (ATP synthase F(0) sector subunit c) (F-type ATPase subunit c) (F-ATPase subunit c) (Lipid-binding protein)	ATPase C chain family	ATPase, F0 complex, subunit C, bacterial/chloroplast	[C] Energy production and conversion		K02110
10_GL0099005	1	0	0	0	0	1	1	1	0	1	0	Bacteria	Firmicutes	Clostridia	Clostridiales	Lachnospiraceae		Lachnospiraceae bacterium 10-1
10_GL0099916	0	0	0	0	0	1	1	0	0	0	0	Bacteria	Bacteroidetes	Bacteroidia	Bacteroidales				Enolase (EC 4.2.1.11) (2-phospho-D-glycerate hydro-lyase) (2-phosphoglycerate dehydratase)	Enolase family	Enolase	[G] Carbohydrate transport and metabolism	glycolysis	K01689	4.2.1.11
10_GL0100650	0	0	0	0	1	1	1	1	0	0	0	Bacteria	Bacteroidetes	Bacteroidia	Bacteroidales	Prevotellaceae	Prevotella				Gram-negative bacterial TonB protein
10_GL0100653	1	1	1	1	3	5	6	3	1	1	0	Bacteria										[U] Intracellular trafficking, secretion, and vesicular transport
11_GL0000686	0	0	0	1	0	0	0	0	0	0	1	Bacteria	Firmicutes						Pyruvate, phosphate dikinase (EC 2.7.9.1) (Pyruvate, orthophosphate dikinase)	PEP-utilizing enzyme family	Pyruvate, phosphate dikinase	[G] Carbohydrate transport and metabolism			2.7.9.1
1-1_GL0001065	0	0	0	0	0	0	0	0	0	0	1	Bacteria	Firmicutes	Clostridia	Clostridiales	Lachnospiraceae		Lachnospiraceae bacterium A4
1-1_GL0001382	1	0	0	0	0	0	0	0	0	0	0
11_GL0001786	0	0	0	0	0	0	0	0	0	1	0	Bacteria	Firmicutes	Clostridia	Clostridiales				Fructose-bisphosphate aldolase (FBP aldolase) (FBPA) (EC 4.1.2.13) (Fructose-1,6-bisphosphate aldolase)	Class II fructose-bisphosphate aldolase family	Fructose-1,6-bisphosphate aldolase, class 2	[G] Carbohydrate transport and metabolism	glycolysis	K01624	4.1.2.13
11_GL0001956	1	0	0	1	0	0	0	0	0	0	0
1-1_GL0002894	1	1	1	1	1	1	1	1	0	0	0	Bacteria										[U] Intracellular trafficking, secretion, and vesicular transport
1-1_GL0003038	2	0	0	1	0	0	0	1	1	3	2	Bacteria	Firmicutes	Clostridia	Clostridiales				Lactaldehyde reductase (EC 1.1.1.77) (Propanediol oxidoreductase)	Iron-containing alcohol dehydrogenase family		[C] Energy production and conversion	L-fucose degradation	K00048	1.1.1.77
1-1_GL0004456	0	0	0	0	1	0	0	0	0	0	0	Bacteria	Bacteroidetes	Bacteroidia	Bacteroidales				Proline--tRNA ligase (EC 6.1.1.15) (Prolyl-tRNA synthetase) (ProRS)	Class-II aminoacyl-tRNA synthetase family, ProS type 3 subfamily	Proline-tRNA ligase, class IIa, archaeal-type	[J] Translation, ribosomal structure and biogenesis		K01881	6.1.1.15
1-1_GL0005243	0	0	0	0	0	0	0	0	0	1	0	Bacteria	Bacteroidetes	Bacteroidia					Chaperone protein DnaK (HSP70) (Heat shock 70 kDa protein) (Heat shock protein 70)	Heat shock protein 70 family	Heat shock protein 70 family			K04043
1-1_GL0005524	0	0	0	1	0	0	0	0	0	1	0	Bacteria	Firmicutes	Clostridia	Clostridiales	Lachnospiraceae		Lachnospiraceae bacterium 28-4			Flagellar basal body-associated protein FliL
1-1_GL0005585	0	0	0	0	0	0	0	0	0	0	1	Bacteria	Firmicutes	Clostridia	Clostridiales	Lachnospiraceae		Lachnospiraceae bacterium 28-4	Electron transport complex subunit RsxC	4Fe4S bacterial-type ferredoxin family, RnfC subfamily	Electron transport complex, subunit RnfC/RsxC	[C] Energy production and conversion		K03615
1-1_GL0005593	0	0	0	0	0	0	0	0	0	1	0	Bacteria	Firmicutes	Clostridia	Clostridiales	Lachnospiraceae			Oxaloacetate decarboxylase alpha chain (EC 4.1.1.3)						4.1.1.3
1-1_GL0005842	0	0	0	0	0	1	1	1	0	0	0	Bacteria	Bacteroidetes	Bacteroidia	Bacteroidales				Glyceraldehyde-3-phosphate dehydrogenase (GAPDH) (EC 1.2.1.12) (NAD-dependent glyceraldehyde-3-phosphate dehydrogenase)	Glyceraldehyde-3-phosphate dehydrogenase family	Glyceraldehyde/Erythrose phosphate dehydrogenase family	[G] Carbohydrate transport and metabolism	glycolysis	K00134	1.2.1.12
11_GL0006246	0	1	0	0	0	0	0	1	0	1	0	Bacteria	Firmicutes	Clostridia	Clostridiales							[T] Signal transduction mechanisms
1-1_GL0006684	0	0	0	2	0	0	0	1	0	3	4	Bacteria	Firmicutes	Clostridia	Clostridiales				Phosphoenolpyruvate-protein phosphotransferase (EC 2.7.3.9) (Phosphotransferase system, enzyme I)	PEP-utilizing enzyme family	Phosphotransferase system, enzyme I	[G] Carbohydrate transport and metabolism		K08483	2.7.3.9
1-1_GL0011364	0	1	0	1	0	0	0	0	0	0	0	Bacteria	Bacteroidetes	Flavobacteriia	Flavobacteriales	Flavobacteriaceae			50S ribosomal protein L7/L12	Bacterial ribosomal protein bL12 family	Ribosomal protein L7/L12	[J] Translation, ribosomal structure and biogenesis		K02935
1-1_GL0012369	0	0	0	0	0	0	0	0	0	0	1	Bacteria	Firmicutes	Clostridia	Clostridiales	Oscillospiraceae	Oscillibacter		10 kDa chaperonin (GroES protein) (Protein Cpn10)	GroES chaperonin family	Chaperonin Cpn10	[O] Posttranslational modification, protein turnover, chaperones
11_GL0012639	4	6	1	4	1	1	1	3	1	4	4	Bacteria	Firmicutes	Clostridia	Clostridiales				NADP-specific glutamate dehydrogenase (NADP-GDH) (EC 1.4.1.4)	Glu/Leu/Phe/Val dehydrogenases family	Glutamate dehydrogenase	[E] Amino acid transport and metabolism		K00262	1.4.1.4
1-1_GL0013126	0	0	0	0	0	0	0	0	0	1	2	Bacteria	Firmicutes	Clostridia	Clostridiales	Lachnospiraceae	Roseburia		DNA-directed RNA polymerase subunit alpha (RNAP subunit alpha) (EC 2.7.7.6) (RNA polymerase subunit alpha) (Transcriptase subunit alpha)	RNA polymerase alpha chain family	DNA-directed RNA polymerase, alpha subunit	[K] Transcription		K03040	2.7.7.6
11_GL0013336	0	0	0	0	0	0	0	0	0	0	1	Bacteria	Firmicutes	Clostridia	Clostridiales	Lachnospiraceae			Multiple sugar-binding periplasmic protein SbpA (Sugar-binding protein A)	Bacterial solute-binding protein 2 family		[G] Carbohydrate transport and metabolism
1-1_GL0014063	0	1	0	0	0	0	0	0	0	0	0	Bacteria	Firmicutes	Clostridia	Clostridiales	Lachnospiraceae			UDP-glucose 4-epimerase (EC 5.1.3.2) (Galactowaldenase) (UDP-galactose 4-epimerase)	NAD(P)-dependent epimerase/dehydratase family	Nucleotide sugar epimerase	[M] Cell wall/membrane/envelope biogenesis	galactose metabolism	K01784	5.1.3.2
1-1_GL0014250	1	2	0	3	0	0	0	1	0	4	4	Bacteria	Firmicutes	Clostridia	Clostridiales				Outer membrane protein H.8			[G] Carbohydrate transport and metabolism
1-1_GL0014485	0	0	0	0	0	1	0	0	0	0	0	Bacteria	Bacteroidetes	Bacteroidia	Bacteroidales				Pyruvate synthase (EC 1.2.7.1) (Pyruvate-ferredoxin oxidoreductase) (POR)		Pyruvate-flavodoxin oxidoreductase	[C] Energy production and conversion			1.2.7.1
11_GL0014548	2	5	3	3	3	2	2	2	1	4	2	Bacteria	Firmicutes	Clostridia	Clostridiales	Lachnospiraceae		Lachnospiraceae bacterium A2	Flagellin (Fragment)	Bacterial flagellin family	Flagellin
1-1_GL0016145	0	0	0	0	0	1	1	0	0	0	0	Bacteria	Bacteroidetes	Bacteroidia	Bacteroidales	Prevotellaceae	Prevotella
1-1_GL0016776	1	0	1	1	1	1	0	1	1	1	0	Bacteria	Bacteroidetes	Bacteroidia	Bacteroidales
1-1_GL0018088	1	0	0	0	0	0	0	0	0	0	0	Bacteria	Firmicutes	Clostridia	Clostridiales	Lachnospiraceae			Bifunctional protein GlmU [Includes: UDP-N-acetylglucosamine pyrophosphorylase (EC 2.7.7.23) (N-acetylglucosamine-1-phosphate uridyltransferase); Glucosamine-1-phosphate N-acetyltransferase (EC 2.3.1.157)]	N-acetylglucosamine-1-phosphate uridyltransferase family		[E] Amino acid transport and metabolism	UDP-N-acetyl-alpha-D-glucosamine biosynthesis	K04042	2.7.7.23
11_GL0018925	1	0	0	1	0	0	0	0	0	0	0	Bacteria	Firmicutes	Clostridia	Clostridiales				Alanine dehydrogenase 2 (EC 1.4.1.1)	AlaDH/PNT family	Alanine dehydrogenase	[E] Amino acid transport and metabolism	L-alanine degradation via dehydrogenase pathway	K00259	1.4.1.1
1-1_GL0019128	0	0	0	1	0	0	0	0	0	0	0	Bacteria	Firmicutes	Clostridia	Clostridiales	Lachnospiraceae		Lachnospiraceae bacterium 28-4	Protein CotJC	Manganese catalase family		[P] Inorganic ion transport and metabolism		K06334
1-1_GL0020653	0	0	0	0	0	0	0	0	0	0	1	Bacteria	Firmicutes	Clostridia	Clostridiales	Lachnospiraceae			Nucleoid-associated protein EUBELI_02017	YbaB/EbfC family				K09747
1-1_GL0020819	0	0	0	1	0	0	0	0	0	0	1	Bacteria	Firmicutes	Clostridia	Clostridiales	Clostridiaceae	Clostridium		Putative propionyl-CoA carboxylase beta chain (PCCase) (EC 6.4.1.3) (Propanoyl-CoA:carbon dioxide ligase)	AccD/PCCB family		[I] Lipid transport and metabolism	propanoyl-CoA degradation	K01966	6.4.1.3
11_GL0020901	2	5	5	4	1	0	0	1	0	1	3	Bacteria	Firmicutes	Clostridia	Clostridiales	Lachnospiraceae	Roseburia	Roseburia intestinalis	B-type flagellin	Bacterial flagellin family	Flagellin	[N] Cell motility		K02406
11_GL0021745	1	2	0	3	0	0	0	1	0	2	1	Bacteria	Firmicutes	Clostridia	Clostridiales				ATP synthase subunit alpha (EC 3.6.3.14) (ATP synthase F1 sector subunit alpha) (F-ATPase subunit alpha)	ATPase alpha/beta chains family		[C] Energy production and conversion		K02111	3.6.3.14
11_GL0021796	3	2	2	2	2	1	1	1	1	1	1	Bacteria	Firmicutes	Clostridia	Clostridiales	Lachnospiraceae		Lachnospiraceae bacterium A2	Flagellin	Bacterial flagellin family	Flagellin	[N] Cell motility		K02406
1-1_GL0022010	0	1	0	0	0	0	0	0	0	0	0	Bacteria	Firmicutes	Clostridia	Clostridiales				Phosphoserine aminotransferase (EC 2.6.1.52) (Phosphohydroxythreonine aminotransferase) (PSAT)	Class-V pyridoxal-phosphate-dependent aminotransferase family, SerC subfamily	Phosphoserine aminotransferase		L-serine biosynthesis	K00831	2.6.1.52
1-1_GL0022474	0	0	0	3	0	0	0	0	0	2	2	Bacteria	Firmicutes	Clostridia	Clostridiales	Lachnospiraceae		Lachnospiraceae bacterium 28-4	N-acetylhexosamine 1-kinase (EC 2.7.1.162) (N-acetylgalactosamine/N-acetylglucosamine 1-kinase)	Protein kinase superfamily				K13059	2.7.1.162
1-1_GL0023667	0	0	0	0	0	0	0	1	0	0	0	Bacteria	Firmicutes	Clostridia	Clostridiales
1-1_GL0023898	1	0	0	0	0	0	0	0	0	1	1	Bacteria	Firmicutes					Firmicutes bacterium ASF500	Methenyltetrahydrofolate cyclohydrolase (EC 3.5.4.9)	Cyclodeaminase/cyclohydrolase family		[E] Amino acid transport and metabolism	formaldehyde assimilation via serine pathway		3.5.4.9
1-1_GL0023944	0	0	0	0	0	0	0	0	0	2	1	Bacteria	Firmicutes	Clostridia	Clostridiales				Aspartate aminotransferase (AspAT) (EC 2.6.1.1) (Transaminase A)	Class-I pyridoxal-phosphate-dependent aminotransferase family	Aprataxin	[E] Amino acid transport and metabolism			2.6.1.1
1-1_GL0025390	1	0	0	0	0	0	0	1	0	0	1	Bacteria	Firmicutes	Clostridia	Clostridiales	Clostridiaceae	Clostridium		D-galactose-binding periplasmic protein (GBP) (D-galactose/ D-glucose-binding protein) (GGBP)	Bacterial solute-binding protein 2 family		[G] Carbohydrate transport and metabolism		K10540
1-1_GL0025857	0	0	0	1	0	0	0	0	0	0	0	Bacteria	Firmicutes	Clostridia	Clostridiales	Lachnospiraceae			dTDP-glucose 4,6-dehydratase (EC 4.2.1.46)	NAD(P)-dependent epimerase/dehydratase family, dTDP-glucose dehydratase subfamily	dTDP-glucose 4,6-dehydratase		dTDP-L-rhamnose biosynthesis	K01710	4.2.1.46
11_GL0026528	0	0	0	1	0	0	0	0	0	0	0	Bacteria	Firmicutes	Clostridia	Clostridiales				30S ribosomal protein S11	Universal ribosomal protein uS11 family	Ribosomal protein S11, bacterial-type	[J] Translation, ribosomal structure and biogenesis		K02948
1-1_GL0026922	1	2	0	2	1	1	1	1	0	1	1	Bacteria	Firmicutes	Clostridia	Clostridiales				Phosphoglycerate kinase (EC 2.7.2.3)	Phosphoglycerate kinase family	Phosphoglycerate kinase	[G] Carbohydrate transport and metabolism	glycolysis	K00927	2.7.2.3
1-1_GL0027651	0	0	0	0	0	1	1	0	0	0	0	Bacteria	Bacteroidetes	Bacteroidia	Bacteroidales	Prevotellaceae	Prevotella	Prevotella sp. CAG:485	Propionyl-CoA:succinate CoA transferase (EC 2.8.3.-)	Acetyl-CoA hydrolase/transferase family	Succinate CoA transferase	[C] Energy production and conversion			2.8.3.-
11_GL0028723	4	1	0	0	0	0	0	0	0	0	0	Bacteria	Firmicutes	Clostridia	Clostridiales	Lachnospiraceae		Lachnospiraceae bacterium A4
11_GL0029877	0	3	0	6	1	0	0	2	1	0	2	Bacteria	Firmicutes	Clostridia	Clostridiales	Lachnospiraceae			Probable sugar-binding periplasmic protein	Bacterial solute-binding protein 1 family	Carbohydrate ABC transporter substrate-binding, CPR0540	[G] Carbohydrate transport and metabolism		K17315
11_GL0030787	0	0	0	0	0	0	0	0	0	0	1	Bacteria	Firmicutes	Clostridia	Clostridiales	Lachnospiraceae	Butyrivibrio		Lactaldehyde reductase (EC 1.1.1.77) (Propanediol oxidoreductase)	Iron-containing alcohol dehydrogenase family		[C] Energy production and conversion	L-fucose degradation	K00048	1.1.1.77
1-1_GL0031205	0	0	0	0	0	0	0	0	0	1	2	Bacteria	Firmicutes	Clostridia	Clostridiales	Lachnospiraceae		Lachnospiraceae bacterium A4
1-1_GL0031369	1	0	0	0	0	0	0	0	0	0	0	Bacteria	Firmicutes						Urocanate hydratase (Urocanase) (EC 4.2.1.49) (Imidazolonepropionate hydrolase)	Urocanase family	Urocanase	[E] Amino acid transport and metabolism	L-histidine degradation into L-glutamate	K01712	4.2.1.49
1-1_GL0031691	0	0	0	0	0	0	0	0	0	0	2	Bacteria	Firmicutes						Glutamine synthetase (GS) (EC 6.3.1.2) (Glutamate--ammonia ligase) (Glutamine synthetase III) (GSIII)	Glutamine synthetase family		[E] Amino acid transport and metabolism		K01915	6.3.1.2
1-1_GL0031956	0	0	0	0	1	0	0	0	0	0	2
11_GL0033527	0	1	0	0	0	0	0	0	0	0	1	Bacteria	Firmicutes	Clostridia	Clostridiales				30S ribosomal protein S4	Universal ribosomal protein uS4 family	Ribosomal protein S4/S9	[J] Translation, ribosomal structure and biogenesis		K02986
1-1_GL0034299	0	0	0	0	1	1	1	1	0	0	0	Bacteria	Proteobacteria	Gammaproteobacteria	Pseudomonadales	Moraxellaceae	Acinetobacter		Probable FKBP-type peptidyl-prolyl cis-trans isomerase FkpA (PPIase) (EC 5.2.1.8) (Rotamase)	FKBP-type PPIase family	Peptidyl-prolyl cis-trans isomerase, FKBP-type			K03772	5.2.1.8
1-1_GL0035709	0	1	0	0	0	0	0	1	0	0	0	Bacteria	Firmicutes	Clostridia	Clostridiales
1-1_GL0036601	0	0	0	0	0	0	0	0	0	0	2	Bacteria	Firmicutes	Clostridia	Clostridiales	Lachnospiraceae			1,4-alpha-glucan branching enzyme GlgB (EC 2.4.1.18) (1,4-alpha-D-glucan:1,4-alpha-D-glucan 6-glucosyl-transferase) (Alpha-(1->4)-glucan branching enzyme) (Glycogen branching enzyme) (BE)	Glycosyl hydrolase 13 family, GlgB subfamily	Glycoside hydrolase, family 13	[G] Carbohydrate transport and metabolism	glycogen biosynthesis		2.4.1.18
11_GL0037523	0	0	0	0	0	0	0	1	0	1	1	Bacteria	Firmicutes	Clostridia	Clostridiales	Lachnospiraceae					Phosphoenolpyruvate carboxykinase, ATP-utilising	[C] Energy production and conversion
11_GL0037910	0	0	0	0	0	1	0	1	0	1	0	Bacteria	Firmicutes	Clostridia	Clostridiales	Lachnospiraceae		Lachnospiraceae bacterium 10-1	D-galactose-binding periplasmic protein (GBP) (D-galactose/ D-glucose-binding protein) (GGBP)	Bacterial solute-binding protein 2 family		[G] Carbohydrate transport and metabolism		K10540
1-1_GL0038351	0	0	0	0	0	0	0	0	0	0	2	Bacteria	Firmicutes						Reverse rubrerythrin-1 (revRbr 1) (NADH peroxidase) (NPXase) (Npx) (EC 1.11.1.1) (Rubperoxin 1) (Rpr 1)			[C] Energy production and conversion			1.11.1.1
11_GL0038728	0	0	0	0	0	0	0	0	0	2	0	Bacteria	Firmicutes	Clostridia	Clostridiales				50S ribosomal protein L18	Universal ribosomal protein uL18 family		[J] Translation, ribosomal structure and biogenesis		K02881
11_GL0038769	0	0	0	0	0	0	0	0	0	0	2	Bacteria	Firmicutes	Clostridia	Clostridiales							[G] Carbohydrate transport and metabolism
1-1_GL0039822	0	0	0	1	0	0	0	0	0	0	0	Bacteria	Firmicutes	Clostridia	Clostridiales				Thioredoxin reductase (TRXR) (EC 1.8.1.9)	Class-II pyridine nucleotide-disulfide oxidoreductase family	Thioredoxin reductase	[O] Posttranslational modification, protein turnover, chaperones			1.8.1.9
1-1_GL0040488	1	4	5	5	1	2	1	2	0	0	5	Bacteria							Flagellin (Phase 1-R flagellin)	Bacterial flagellin family	Flagellin	[N] Cell motility
1-1_GL0040818	1	1	0	1	0	1	1	1	0	1	1	Bacteria	Firmicutes	Clostridia	Clostridiales	Lachnospiraceae		Lachnospiraceae bacterium 28-4	Putative sensory transducer protein		Chemotaxis methyl-accepting receptor			K03406
11_GL0041276	0	0	0	0	0	0	0	0	0	1	0	Bacteria	Firmicutes	Clostridia	Clostridiales	Lachnospiraceae	Roseburia		Chemotaxis protein CheA (EC 2.7.13.3)		Flagellar biosynthesis protein, FliO	[T] Signal transduction mechanisms		K03407	2.7.13.3
1-1_GL0041844	0	1	2	2	1	1	0	4	0	2	3	Bacteria	Firmicutes	Clostridia	Clostridiales	Lachnospiraceae			Flagellin (Phase 1-I flagellin)	Bacterial flagellin family	Flagellin	[N] Cell motility
11_GL0042282	1	0	0	0	0	0	0	1	0	2	1	Bacteria	Firmicutes	Bacilli	Lactobacillales	Lactobacillaceae	Lactobacillus		Elongation factor G (EF-G)	TRAFAC class translation factor GTPase superfamily, Classic translation factor GTPase family, EF-G/EF-2 subfamily	Translation elongation factor EFG/EF2	[J] Translation, ribosomal structure and biogenesis		K02355
11_GL0044818	1	0	0	1	0	0	0	0	0	0	0	Bacteria	Firmicutes	Clostridia	Clostridiales				Propanediol dehydratase medium subunit (EC 4.2.1.28) (Propanediol utilization protein PduD)	Diol/glycerol dehydratase medium subunit family	Propanediol/glycerol dehydratase, medium subunit	[Q] Secondary metabolites biosynthesis, transport and catabolism	1,2-propanediol degradation	K13919	4.2.1.28
1-1_GL0045076	1	0	0	0	0	0	1	0	0	1	1	Bacteria	Bacteroidetes	Bacteroidia	Bacteroidales				NAD-specific glutamate dehydrogenase (NAD-GDH) (EC 1.4.1.2) (NADH-dependent glutamate dehydrogenase)	Glu/Leu/Phe/Val dehydrogenases family	Glutamate dehydrogenase	[E] Amino acid transport and metabolism		K00262	1.4.1.2
11_GL0045252	0	1	0	1	1	0	0	1	0	1	2	Bacteria	Firmicutes	Clostridia	Clostridiales				Phosphoglycerate kinase (EC 2.7.2.3)	Phosphoglycerate kinase family	Phosphoglycerate kinase	[G] Carbohydrate transport and metabolism	glycolysis	K00927	2.7.2.3
11_GL0045957	2	2	2	2	2	1	1	2	2	2	2	Bacteria	Firmicutes	Clostridia	Clostridiales				50S ribosomal protein L29	Universal ribosomal protein uL29 family	Ribosomal protein L29	[J] Translation, ribosomal structure and biogenesis		K02904
1-1_GL0046100	0	0	0	0	0	0	0	0	0	0	1	Bacteria	Firmicutes	Clostridia	Clostridiales	Lachnospiraceae			Phosphate butyryltransferase (EC 2.3.1.19) (Phosphotransbutyrylase)	Phosphate acetyltransferase and butyryltransferase family	Phosphate butyryltransferase	[C] Energy production and conversion	butanoate metabolism	K00634	2.3.1.19
1-1_GL0046101	0	1	0	1	0	0	0	0	0	2	3	Bacteria	Firmicutes						Butyrate kinase (BK) (EC 2.7.2.7)	Acetokinase family	Butyrate kinase	[C] Energy production and conversion	butanoate metabolism	K00929	2.7.2.7
1-1_GL0047124	0	0	0	0	0	0	0	0	0	0	1	Bacteria	Firmicutes	Clostridia	Clostridiales	Oscillospiraceae	Oscillibacter	Oscillibacter sp. 1-3				[G] Carbohydrate transport and metabolism
1-1_GL0048064	0	0	0	0	0	0	0	0	0	0	1	Bacteria	Firmicutes	Clostridia	Clostridiales	Lachnospiraceae	Roseburia		Glucose-6-phosphate isomerase (GPI) (EC 5.3.1.9) (Phosphoglucose isomerase) (PGI) (Phosphohexose isomerase) (PHI)	GPI family	Phosphoglucose isomerase (PGI)	[G] Carbohydrate transport and metabolism	gluconeogenesis	K01810	5.3.1.9
1-1_GL0048749	1	0	0	0	0	0	0	0	0	0	0	Bacteria	Firmicutes					Firmicutes bacterium ASF500	Putative sensory transducer protein		Chemotaxis methyl-accepting receptor			K03406
11_GL0049046	0	1	0	0	0	0	0	1	0	0	1	Bacteria	Firmicutes	Clostridia	Clostridiales	Lachnospiraceae	Roseburia
1-1_GL0049222	0	1	0	0	0	0	0	0	0	4	4	Bacteria	Firmicutes	Clostridia	Clostridiales	Lachnospiraceae		Lachnospiraceae bacterium 28-4	Leu/Ile/Val-binding protein homolog 3	Leucine-binding protein family	Leu/Ile/Val-binding protein	[E] Amino acid transport and metabolism		K01999
11_GL0049473	0	0	0	0	0	1	1	0	0	0	0	Bacteria	Firmicutes						Propanediol utilization protein PduA	Bacterial microcompartments protein family		[E] Amino acid transport and metabolism
1-1_GL0050864	0	0	0	0	0	0	0	0	0	0	1	Bacteria	Firmicutes						Pyruvate-flavodoxin oxidoreductase (EC 1.2.7.-)	NifJ family	Pyruvate-flavodoxin oxidoreductase	[C] Energy production and conversion			1.2.7.-
11_GL0051056	1	0	0	0	0	0	0	0	0	0	1	Bacteria	Firmicutes	Clostridia	Clostridiales				50S ribosomal protein L23	Universal ribosomal protein uL23 family		[J] Translation, ribosomal structure and biogenesis		K02892
1-1_GL0051356	0	1	0	1	0	0	0	0	0	0	0	Bacteria	Firmicutes						Electron transfer flavoprotein subunit beta (Beta-ETF) (Electron transfer flavoprotein small subunit) (ETFSS)	ETF beta-subunit/FixA family	Electron transfer flavoprotein, beta subunit			K03521
1-1_GL0051611	0	0	0	0	0	0	0	0	0	0	1	Bacteria	Firmicutes	Clostridia	Clostridiales				Uncharacterized protein YceH	TelA family		[P] Inorganic ion transport and metabolism
11_GL0053610	1	2	0	2	0	0	0	0	0	0	0	Bacteria	Firmicutes	Clostridia	Clostridiales				50S ribosomal protein L13	Universal ribosomal protein uL13 family	Ribosomal protein L13, bacterial-type	[J] Translation, ribosomal structure and biogenesis		K02871
1-1_GL0053884	1	1	0	0	0	0	0	1	0	1	1	Bacteria	Firmicutes						Acryloyl-CoA reductase electron transfer subunit beta (Electron transfer flavoprotein large subunit) (ETFLS) (Electron transfer flavoprotein subunit beta) (Beta-ETF)	ETF alpha-subunit/FixB family	Electron transfer flavoprotein, alpha subunit	[C] Energy production and conversion
11_GL0054087	0	0	0	1	0	0	0	0	0	0	1	Bacteria	Firmicutes	Clostridia	Clostridiales	Lachnospiraceae			Elongation factor G (EF-G)	TRAFAC class translation factor GTPase superfamily, Classic translation factor GTPase family, EF-G/EF-2 subfamily	Translation elongation factor EFG/EF2	[J] Translation, ribosomal structure and biogenesis		K02355
1-1_GL0054235	0	0	0	0	0	2	1	0	0	0	0	Bacteria							Phosphoribosylaminoimidazole-succinocarboxamide synthase (EC 6.3.2.6) (SAICAR synthetase)	SAICAR synthetase family	Phosphoribosylaminoimidazole-succinocarboxamide synthase	[F] Nucleotide transport and metabolism	IMP biosynthesis via de novo pathway	K01923	6.3.2.6
11_GL0054940	1	1	0	2	0	0	0	1	0	1	1	Bacteria	Firmicutes	Clostridia	Clostridiales				50S ribosomal protein L21	Bacterial ribosomal protein bL21 family	Ribosomal protein L21-like	[J] Translation, ribosomal structure and biogenesis		K02888
11_GL0055890	1	1	0	0	1	0	0	0	2	1	1	Bacteria	Firmicutes	Clostridia	Clostridiales	Lachnospiraceae		Lachnospiraceae bacterium A2	ABC transporter periplasmic-binding protein YtfQ	Bacterial solute-binding protein 2 family		[G] Carbohydrate transport and metabolism		K02058
1-1_GL0056202	0	0	0	0	0	0	0	0	0	1	1	Bacteria	Firmicutes	Clostridia	Clostridiales	Lachnospiraceae		Lachnospiraceae bacterium 28-4	Putative N-acetylmannosamine-6-phosphate 2-epimerase (EC 5.1.3.9) (ManNAc-6-P epimerase)	NanE family	Putative N-acetylmannosamine-6-phosphate epimerase	[G] Carbohydrate transport and metabolism	N-acetylneuraminate degradation	K01788	5.1.3.9
11_GL0056693	0	0	0	0	0	0	0	0	0	0	1	Bacteria	Firmicutes	Clostridia	Clostridiales	Eubacteriaceae	Eubacterium	Eubacterium plexicaudatum	Probable transaldolase (EC 2.2.1.2)	Transaldolase family, Type 3B subfamily		[G] Carbohydrate transport and metabolism	pentose phosphate pathway	K00616	2.2.1.2
11_GL0059162	0	0	0	0	0	0	0	0	0	1	0	Bacteria	Firmicutes	Clostridia	Clostridiales	Eubacteriaceae	Eubacterium	Eubacterium plexicaudatum	Chemotaxis protein CheV			[N] Cell motility		K03415
1-1_GL0059762	0	0	0	0	0	0	0	0	0	0	3	Bacteria	Firmicutes	Clostridia	Clostridiales							[G] Carbohydrate transport and metabolism
11_GL0059963	0	0	0	0	0	0	0	1	0	1	1	Bacteria	Firmicutes	Clostridia	Clostridiales				Acetyl-CoA acetyltransferase (EC 2.3.1.9) (Acetoacetyl-CoA thiolase)	Thiolase family		[I] Lipid transport and metabolism	(R)-mevalonate biosynthesis	K00626	2.3.1.9
1-1_GL0060052	0	2	0	0	0	0	0	0	0	2	2	Bacteria	Firmicutes	Clostridia	Clostridiales				Protein FixB	ETF alpha-subunit/FixB family	Electron transfer flavoprotein, alpha subunit	[C] Energy production and conversion
1-1_GL0060069	2	3	0	2	0	0	0	2	0	4	3	Bacteria	Firmicutes	Clostridia	Clostridiales				Lactoyl-CoA dehydratase subunit alpha (EC 4.2.1.54) ((R)-lactyl-CoA dehydratase component E II) (2-hydroxybutyroyl-CoA dehydratase) (Fragment)	FldB/FldC dehydratase alpha/beta subunit family	2-hydroxyglutaryl-CoA dehydratase, D-component	[E] Amino acid transport and metabolism		K20626	4.2.1.54
1-1_GL0060070	1	2	0	0	0	0	0	0	0	1	0	Bacteria	Firmicutes	Clostridia	Clostridiales				Lactoyl-CoA dehydratase subunit beta (EC 4.2.1.54) ((R)-lactyl-CoA dehydratase component E II) (2-hydroxybutyroyl-CoA dehydratase) (Fragment)	FldB/FldC dehydratase alpha/beta subunit family	2-hydroxyglutaryl-CoA dehydratase, D-component	[E] Amino acid transport and metabolism		K20627	4.2.1.54
1-1_GL0060071	3	5	0	0	0	0	0	1	0	3	2	Bacteria	Firmicutes						Caffeate CoA-transferase (EC 2.8.3.23) (Hydrocaffeyl-CoA:caffeate CoA transferase)	3-oxoacid CoA-transferase family	3-oxoacid CoA-transferase	[I] Lipid transport and metabolism			2.8.3.23
11_GL0060368	0	0	0	0	0	0	0	0	0	0	1	Bacteria	Firmicutes	Clostridia	Clostridiales	Eubacteriaceae	Eubacterium	Eubacterium plexicaudatum			ATP-dependent DNA helicase PcrA
1-1_GL0061699	0	0	0	0	0	0	0	0	0	1	1	Bacteria	Firmicutes						Chemotaxis protein CheW			[N] Cell motility		K03408
11_GL0061752	1	1	0	1	0	0	0	1	0	1	1	Bacteria	Firmicutes	Clostridia	Clostridiales	Lachnospiraceae
11_GL0062968	0	0	0	0	0	0	0	0	1	0	0	Bacteria	Bacteroidetes	Bacteroidia
1-1_GL0063096	0	0	0	0	0	0	0	0	0	0	1	Bacteria	Firmicutes						Fructose import ATP-binding protein FruK (EC 3.6.3.17)	ABC transporter superfamily		[P] Inorganic ion transport and metabolism		K02056	3.6.3.17
1-1_GL0063111	0	2	0	1	0	0	0	0	0	2	3	Bacteria	Firmicutes	Clostridia	Clostridiales				L-arabinose isomerase (EC 5.3.1.4)	Arabinose isomerase family	L-arabinose isomerase	[G] Carbohydrate transport and metabolism	L-arabinose degradation via L-ribulose		5.3.1.4
1-1_GL0063230	0	0	0	0	0	0	0	0	1	0	0	Bacteria	Bacteroidetes	Bacteroidia	Bacteroidales				30S ribosomal protein S7	Universal ribosomal protein uS7 family	Ribosomal protein S7, bacterial/organellar-type	[J] Translation, ribosomal structure and biogenesis		K02992
1-1_GL0063435	0	1	0	0	0	0	0	0	0	2	2	Bacteria	Firmicutes	Clostridia	Clostridiales	Lachnospiraceae		[Eubacterium] rectale	Probable arabinose-binding protein	Bacterial solute-binding protein 1 family		[G] Carbohydrate transport and metabolism		K17234
1-1_GL0063691	0	0	0	1	0	0	0	0	0	1	2	Bacteria	Firmicutes						B-type flagellin	Bacterial flagellin family	Flagellin	[N] Cell motility		K02406
1-1_GL0063928	0	0	0	0	0	0	0	0	0	0	1	Bacteria	Firmicutes	Clostridia	Clostridiales
1-1_GL0064491	0	0	0	0	0	0	0	0	0	0	1	Bacteria	Firmicutes	Clostridia	Clostridiales	Lachnospiraceae			D-3-phosphoglycerate dehydrogenase (PGDH) (EC 1.1.1.95) (2-oxoglutarate reductase) (EC 1.1.1.399)	D-isomer specific 2-hydroxyacid dehydrogenase family		[E] Amino acid transport and metabolism	L-serine biosynthesis	K00058	1.1.1.95
11_GL0065713	9	10	5	8	6	4	3	10	5	10	14	Bacteria	Firmicutes	Clostridia	Clostridiales				60 kDa chaperonin (GroEL protein) (Protein Cpn60)	Chaperonin (HSP60) family		[O] Posttranslational modification, protein turnover, chaperones		K04077
1-1_GL0066071	0	0	0	1	0	0	0	0	1	2	0	Bacteria	Proteobacteria	Alphaproteobacteria	Rhodospirillales	Acetobacteraceae	Roseomonas	Roseomonas cervicalis	Maltodextrin import ATP-binding protein MsmX (EC 3.6.3.-)	ABC transporter superfamily		[G] Carbohydrate transport and metabolism		K10112	3.6.3.-
1-1_GL0066406	1	0	0	1	0	0	0	0	0	0	1	Bacteria	Firmicutes						Argininosuccinate synthase (EC 6.3.4.5) (Citrulline--aspartate ligase)	Argininosuccinate synthase family, Type 1 subfamily	Argininosuccinate synthase, type 1 subfamily	[E] Amino acid transport and metabolism	L-arginine biosynthesis	K01940	6.3.4.5
1-1_GL0067513	0	0	0	0	0	0	0	0	0	1	0	Bacteria	Firmicutes						DNA-binding protein HU-1	Bacterial histone-like protein family		[L] Replication, recombination and repair		K03530
1-1_GL0068022	0	0	0	0	0	0	0	0	0	0	1	Bacteria	Firmicutes	Clostridia	Clostridiales	Lachnospiraceae			30S ribosomal protein S16	Bacterial ribosomal protein bS16 family	Ribosomal protein S16	[J] Translation, ribosomal structure and biogenesis		K02959
1-1_GL0068224	0	1	0	1	0	0	0	0	0	1	1	Bacteria	Firmicutes	Clostridia	Clostridiales	Lachnospiraceae			Reverse rubrerythrin-1 (revRbr 1) (NADH peroxidase) (NPXase) (Npx) (EC 1.11.1.1) (Rubperoxin 1) (Rpr 1)			[C] Energy production and conversion			1.11.1.1
1-1_GL0068362	0	0	0	1	0	0	0	0	0	0	0	Bacteria	Firmicutes	Clostridia	Clostridiales	Lachnospiraceae		Lachnospiraceae bacterium 28-4	RNA polymerase sigma factor SigA (RNA polymerase principal sigma factor HrdB)	Sigma-70 factor family, RpoD/SigA subfamily
1-1_GL0070002	0	0	0	0	0	2	2	0	0	0	0	Bacteria	Bacteroidetes	Bacteroidia	Bacteroidales			Bacteroidales bacterium 43_36				[M] Cell wall/membrane/envelope biogenesis
1-1_GL0070084	0	0	0	0	0	0	0	0	0	0	1	Bacteria	Firmicutes	Clostridia	Clostridiales	Lachnospiraceae
11_GL0070090	0	1	0	1	0	0	0	0	0	1	0	Bacteria	Firmicutes	Clostridia	Clostridiales	Lachnospiraceae			Probable ABC transporter permease protein BAB2_1148	Binding-protein-dependent transport system permease family		[P] Inorganic ion transport and metabolism		K02050
1-1_GL0072118	0	1	0	1	0	0	0	0	0	1	1	Bacteria	Firmicutes	Clostridia	Clostridiales	Lachnospiraceae		Lachnospiraceae bacterium 28-4	Putative ribose/galactose/methyl galactoside import ATP-binding protein (EC 3.6.3.17)	ABC transporter superfamily, Carbohydrate importer 2 (CUT2) (TC 3.A.1.2) family	ABC transporter, galactose import, MglA	[P] Inorganic ion transport and metabolism		K10441	3.6.3.17
1-1_GL0072504	1	0	0	0	0	0	0	1	0	0	0	Bacteria	Firmicutes	Clostridia	Clostridiales				Acetate CoA-transferase YdiF (EC 2.8.3.8) (Short-chain acyl-CoA:acetate CoA-transferase)	3-oxoacid CoA-transferase family	3-oxoacid CoA-transferase			K19709	2.8.3.8
1-1_GL0072539	0	0	0	0	0	0	0	0	0	0	2	Bacteria	Firmicutes	Clostridia	Clostridiales				Uncharacterized protein YgeY	Peptidase M20A family		[E] Amino acid transport and metabolism
11_GL0072892	0	0	0	0	0	0	0	0	0	0	1	Bacteria	Firmicutes						Glyceraldehyde-3-phosphate dehydrogenase (GAPDH) (EC 1.2.1.12) (CP 17/CP 18) (NAD-dependent glyceraldehyde-3-phosphate dehydrogenase)	Glyceraldehyde-3-phosphate dehydrogenase family	Glyceraldehyde/Erythrose phosphate dehydrogenase family	[G] Carbohydrate transport and metabolism	glycolysis		1.2.1.12
1-1_GL0073107	3	2	0	1	0	0	0	2	0	3	1	Bacteria	Firmicutes	Clostridia	Clostridiales				NAD-specific glutamate dehydrogenase (NAD-GDH) (EC 1.4.1.2)	Glu/Leu/Phe/Val dehydrogenases family	Glutamate dehydrogenase	[E] Amino acid transport and metabolism	L-glutamate degradation via hydroxyglutarate pathway		1.4.1.2
1-1_GL0073364	0	0	0	0	0	0	0	0	0	0	1	Bacteria	Firmicutes	Clostridia	Clostridiales	Lachnospiraceae			Chemotaxis protein CheV					K03415
1-1_GL0073373	0	0	0	0	0	0	0	0	0	1	0	Bacteria	Firmicutes	Clostridia	Clostridiales				Glucosamine-6-phosphate deaminase (EC 3.5.99.6) (GlcN6P deaminase) (GNPDA) (Glucosamine-6-phosphate isomerase)	Glucosamine/galactosamine-6-phosphate isomerase family, NagB subfamily	Glucosamine-6-phosphate isomerase	[G] Carbohydrate transport and metabolism	N-acetylneuraminate degradation	K02564	3.5.99.6
11_GL0073474	4	0	0	0	0	0	0	0	0	0	0
1-1_GL0074729	1	2	0	0	0	0	0	0	0	2	2	Bacteria	Firmicutes						Glutamate synthase [NADPH] small chain (EC 1.4.1.13) (Glutamate synthase subunit beta) (GLTS beta chain) (NADPH-GOGAT)			[E] Amino acid transport and metabolism	L-glutamate biosynthesis via GLT pathway	K00266	1.4.1.13
1-1_GL0075817	0	1	0	0	0	0	0	0	0	0	1	Bacteria	Firmicutes	Clostridia	Clostridiales				Triosephosphate isomerase (TIM) (TPI) (EC 5.3.1.1) (Triose-phosphate isomerase)	Triosephosphate isomerase family	Triosephosphate isomerase, bacterial/eukaryotic	[G] Carbohydrate transport and metabolism	gluconeogenesis	K01803	5.3.1.1
11_GL0076988	5	2	0	2	2	0	1	2	1	3	2	Bacteria	Firmicutes						Glycine--tRNA ligase (EC 6.1.1.14) (Glycyl-tRNA synthetase) (GlyRS)	Class-II aminoacyl-tRNA synthetase family		[J] Translation, ribosomal structure and biogenesis		K01880	6.1.1.14
1-1_GL0077793	0	3	1	1	2	2	2	0	1	2	1	Bacteria	Bacteroidetes	Bacteroidia	Bacteroidales				50S ribosomal protein L16	Universal ribosomal protein uL16 family	Ribosomal protein L16	[J] Translation, ribosomal structure and biogenesis		K02878
1-1_GL0077875	0	1	0	0	0	0	0	0	0	0	0	Bacteria	Firmicutes	Clostridia	Clostridiales				50S ribosomal protein L29	Universal ribosomal protein uL29 family	Ribosomal protein L29	[J] Translation, ribosomal structure and biogenesis		K02904
1-1_GL0079450	0	1	0	0	0	0	0	0	0	0	1	Bacteria	Firmicutes	Clostridia	Clostridiales				NADPH-dependent butanol dehydrogenase (BDH) (EC 1.1.1.-)	Iron-containing alcohol dehydrogenase family		[C] Energy production and conversion			1.1.1.-
1-1_GL0080208	0	0	0	0	0	0	0	0	0	1	0	Bacteria	Firmicutes	Clostridia	Clostridiales	Lachnospiraceae			Elongation factor G (EF-G)	TRAFAC class translation factor GTPase superfamily, Classic translation factor GTPase family, EF-G/EF-2 subfamily	Translation elongation factor EFG/EF2	[J] Translation, ribosomal structure and biogenesis		K02355
1-1_GL0081654	0	0	0	0	0	0	0	0	0	0	1	Bacteria	Firmicutes	Clostridia	Clostridiales	Lachnospiraceae		Lachnospiraceae bacterium 28-4				[G] Carbohydrate transport and metabolism
11_GL0081709	1	2	0	1	0	0	0	0	0	0	4	Bacteria	Firmicutes	Clostridia	Clostridiales				Electron transfer flavoprotein subunit beta (Beta-ETF) (Electron transfer flavoprotein small subunit) (ETFSS)	ETF alpha-subunit/FixB family	Electron transfer flavoprotein, beta subunit	[C] Energy production and conversion
11_GL0081710	0	2	0	0	0	0	0	0	0	0	1	Bacteria	Firmicutes	Clostridia	Clostridiales				Glycolate oxidase subunit GlcD	FAD-binding oxidoreductase/transferase type 4 family		[C] Energy production and conversion		K00104
11_GL0081716	0	1	1	1	0	0	0	0	0	0	0	Bacteria	Firmicutes	Clostridia	Clostridiales							[C] Energy production and conversion
1-1_GL0081840	0	0	1	1	1	1	1	1	0	0	0	Bacteria	Bacteroidetes	Bacteroidia	Bacteroidales	Prevotellaceae	Prevotella		Alkyl hydroperoxide reductase C (EC 1.11.1.15) (Alkyl hydroperoxide reductase protein C22) (Peroxiredoxin) (Thioredoxin peroxidase)	Peroxiredoxin family, AhpC/Prx1 subfamily		[O] Posttranslational modification, protein turnover, chaperones		K03386	1.11.1.15
11_GL0082776	0	0	0	0	0	1	1	0	0	0	0	Bacteria	Bacteroidetes	Bacteroidia	Bacteroidales	Rikenellaceae	Alistipes		Agglutinin receptor (SSP-5)	SpaP/Ssp5/SpaA family	Vesicle tethering protein p115-like	[U] Intracellular trafficking, secretion, and vesicular transport
1-1_GL0083896	1	0	0	0	0	0	0	0	0	1	1	Bacteria	Firmicutes	Clostridia	Clostridiales		Flavonifractor		N-acetylneuraminate lyase (NAL) (Neu5Ac lyase) (EC 4.1.3.3) (N-acetylneuraminate pyruvate-lyase) (N-acetylneuraminic acid aldolase) (Sialate lyase) (Sialic acid aldolase) (Sialic acid lyase)	DapA family, NanA subfamily		[E] Amino acid transport and metabolism	N-acetylneuraminate degradation	K01639	4.1.3.3
1-1_GL0083901	0	1	0	0	0	0	0	0	0	0	0	Bacteria	Firmicutes	Clostridia	Clostridiales							[G] Carbohydrate transport and metabolism
1-1_GL0084350	0	0	0	0	0	0	1	0	0	0	0	Bacteria	Bacteroidetes	Bacteroidia	Bacteroidales							[M] Cell wall/membrane/envelope biogenesis
11_GL0085540	0	0	0	0	0	0	0	0	0	0	2	Bacteria	Firmicutes	Clostridia	Clostridiales
1-1_GL0085917	0	0	0	0	0	0	0	0	0	0	1	Bacteria	Firmicutes	Clostridia	Clostridiales				Mannonate dehydratase (EC 4.2.1.8) (D-mannonate hydro-lyase)	Mannonate dehydratase family	Mannonate dehydratase	[G] Carbohydrate transport and metabolism	pentose and glucuronate interconversion	K01686	4.2.1.8
1-1_GL0086100	0	0	0	0	0	0	0	0	0	1	1	Bacteria	Firmicutes	Clostridia	Clostridiales				Triosephosphate isomerase (TIM) (TPI) (EC 5.3.1.1) (Triose-phosphate isomerase)	Triosephosphate isomerase family	Triosephosphate isomerase, bacterial/eukaryotic	[G] Carbohydrate transport and metabolism	gluconeogenesis	K01803	5.3.1.1
1-1_GL0087904	0	1	0	0	0	0	0	0	0	0	0
1-1_GL0088282	0	1	1	2	0	0	0	0	0	1	2	Bacteria	Firmicutes	Clostridia	Clostridiales	Lachnospiraceae		Lachnospiraceae bacterium A4	Flagellar hook protein FlgE	Flagella basal body rod proteins family	Fagellar hook-basal body protein, FlgE/F/G			K02390
11_GL0088712	0	1	0	1	0	0	0	0	0	0	0	Bacteria	Firmicutes	Clostridia	Clostridiales				PTS-dependent dihydroxyacetone kinase 1, dihydroxyacetone-binding subunit DhaK (EC 2.7.1.121)				glycerol degradation	K05878	2.7.1.121
1-1_GL0088736	0	0	0	0	0	0	0	0	0	0	2	Bacteria	Firmicutes
1-1_GL0089286	1	0	0	0	0	0	0	0	0	0	0	Bacteria	Firmicutes									[G] Carbohydrate transport and metabolism
1-1_GL0089617	0	2	0	0	0	0	0	0	0	0	0	Bacteria	Bacteroidetes	Bacteroidia	Bacteroidales				Methylmalonyl-CoA mutase large subunit (EC 5.4.99.2) (MCM-alpha)	Methylmalonyl-CoA mutase family		[I] Lipid transport and metabolism	propanoyl-CoA degradation	K01847	5.4.99.2
1-1_GL0089662	0	0	0	0	0	0	0	0	0	1	0	Bacteria	Firmicutes	Clostridia	Clostridiales	Lachnospiraceae			DNA-binding protein HU (DNA-binding protein II) (HB)	Bacterial histone-like protein family		[L] Replication, recombination and repair
1-1_GL0089678	0	0	0	0	0	0	0	0	0	0	1	Bacteria	Firmicutes	Clostridia	Clostridiales	Lachnospiraceae		Lachnospiraceae bacterium 28-4
1-1_GL0090717	0	0	0	0	0	0	0	0	0	0	2	Bacteria	Firmicutes	Clostridia	Clostridiales	Lachnospiraceae		Lachnospiraceae bacterium A4	Putative sensory transducer protein		Chemotaxis methyl-accepting receptor			K03406
11_GL0090856	7	5	0	6	3	1	0	5	0	10	8	Bacteria	Firmicutes	Clostridia	Clostridiales				Chaperone protein DnaK (HSP70) (Heat shock 70 kDa protein) (Heat shock protein 70)	Heat shock protein 70 family	Heat shock protein 70 family	[O] Posttranslational modification, protein turnover, chaperones		K04043
1-1_GL0091834	0	0	0	0	0	0	0	1	0	0	0	Bacteria	Firmicutes						50S ribosomal protein L30	Universal ribosomal protein uL30 family	Ribosomal protein L30, bacterial-type	[J] Translation, ribosomal structure and biogenesis		K02907
1-1_GL0092528	0	0	0	0	0	0	0	0	0	0	1	Bacteria	Firmicutes	Clostridia	Clostridiales	Lachnospiraceae		Lachnospiraceae bacterium 28-4	50S ribosomal protein L7/L12	Bacterial ribosomal protein bL12 family	Ribosomal protein L7/L12	[J] Translation, ribosomal structure and biogenesis		K02935
1-1_GL0092531	0	1	0	1	0	0	0	0	0	1	1	Bacteria	Firmicutes	Clostridia	Clostridiales	Lachnospiraceae			50S ribosomal protein L1	Universal ribosomal protein uL1 family	Ribosomal protein L1/ribosomal biogenesis protein	[J] Translation, ribosomal structure and biogenesis		K02863
1-1_GL0093221	0	0	0	0	1	1	1	1	0	0	0	Bacteria							Internalin-J
1-1_GL0093739	1	0	0	0	0	0	0	0	0	0	0	Bacteria	Firmicutes	Clostridia	Clostridiales				D-galactose-binding periplasmic protein (GBP) (D-galactose/ D-glucose-binding protein) (GGBP)	Bacterial solute-binding protein 2 family		[G] Carbohydrate transport and metabolism		K10540
1-1_GL0093789	0	0	0	0	0	0	0	0	0	0	1	Bacteria	Firmicutes	Clostridia	Clostridiales				Phenylacetate-coenzyme A ligase (EC 6.2.1.30) (Phenylacetyl-CoA ligase) (PA-CoA ligase)	Phenylacetyl-CoA ligase family	Phenylacetate-CoA ligase	[Q] Secondary metabolites biosynthesis, transport and catabolism	phenylacetate degradation	K01912	6.2.1.30
1-1_GL0094700	0	0	0	1	0	0	0	0	0	0	1	Bacteria	Firmicutes	Clostridia	Clostridiales	Lachnospiraceae		Lachnospiraceae bacterium A4	Putative aminotransferase MSMEG_6286/MSMEI_6121	Class-I pyridoxal-phosphate-dependent aminotransferase family		[K] Transcription
1-1_GL0095104	3	0	0	0	1	0	0	0	0	0	0	Bacteria	Firmicutes	Clostridia	Clostridiales	Oscillospiraceae	Oscillibacter	Oscillibacter sp. 1-3	Putative flagellin YvzB	Bacterial flagellin family	Flagellin	[N] Cell motility		K02406
1-1_GL0095225	0	0	0	0	0	0	0	0	0	0	1	Bacteria	Bacteroidetes	Bacteroidia	Bacteroidales	Prevotellaceae	Prevotella	Prevotella sp. CAG:485	Outer membrane protein 40 (Omp40) (PG33)	OmpA family		[M] Cell wall/membrane/envelope biogenesis
1-1_GL0095602	0	1	1	4	0	1	1	1	0	1	2	Bacteria	Firmicutes	Clostridia	Clostridiales	Lachnospiraceae		Lachnospiraceae bacterium A4	Flagellin (Phase 1-C flagellin)	Bacterial flagellin family	Flagellin	[N] Cell motility
11_GL0095603	0	0	0	1	0	0	0	0	0	0	0	Bacteria	Firmicutes						Xylan 1,4-beta-xylosidase (EC 3.2.1.37) (1,4-beta-D-xylan xylohydrolase) (Alpha-L-arabinofuranosidase) (Arabinosidase) (EC 3.2.1.55) (Beta-D-xylosidase) (Exo-1,4-beta-xylosidase)	Glycosyl hydrolase 3 family	Glycoside hydrolase family 3	[G] Carbohydrate transport and metabolism	xylan degradation	K05349	3.2.1.37
1-1_GL0095651	0	0	0	0	0	0	0	0	0	0	1	Bacteria	Firmicutes	Clostridia	Clostridiales	Lachnospiraceae		Lachnospiraceae bacterium 28-4
1-1_GL0096095	1	0	0	0	0	0	0	0	0	0	0	Bacteria	Firmicutes	Clostridia	Clostridiales	Lachnospiraceae		Lachnospiraceae bacterium A4	Protein CotJB					K06333
1-1_GL0096096	1	1	1	1	0	0	0	0	0	0	0	Bacteria	Firmicutes	Clostridia	Clostridiales	Lachnospiraceae
1-1_GL0096137	0	0	0	0	0	0	0	0	0	0	3	Bacteria	Firmicutes	Clostridia	Clostridiales	Lachnospiraceae		Lachnospiraceae bacterium 28-4	N-acetylneuraminate lyase (NAL) (Neu5Ac lyase) (EC 4.1.3.3) (N-acetylneuraminate pyruvate-lyase) (N-acetylneuraminic acid aldolase) (Sialate lyase) (Sialic acid aldolase) (Sialic acid lyase)	DapA family, NanA subfamily		[E] Amino acid transport and metabolism	N-acetylneuraminate degradation	K01639	4.1.3.3
1-1_GL0096151	3	1	1	2	1	5	2	4	1	4	7	Bacteria	Firmicutes	Clostridia	Clostridiales	Lachnospiraceae		Lachnospiraceae bacterium 28-4	Flagellin	Bacterial flagellin family	Flagellin			K02406
1-1_GL0096174	0	0	0	0	0	0	0	0	0	1	0	Bacteria	Firmicutes	Clostridia	Clostridiales	Lachnospiraceae		Lachnospiraceae bacterium 28-4
1-1_GL0096918	0	0	0	0	0	0	0	0	0	0	1	Bacteria	Firmicutes	Clostridia	Clostridiales	Lachnospiraceae			Putative arabinogalactan oligomer transport system permease protein GanP	Binding-protein-dependent transport system permease family		[P] Inorganic ion transport and metabolism		K15771
11_GL0097831	0	0	0	0	0	0	0	2	0	0	0	Bacteria	Firmicutes	Clostridia	Clostridiales	Lachnospiraceae						[G] Carbohydrate transport and metabolism
11_GL0098754	0	0	0	0	0	0	0	0	0	0	1	Bacteria	Firmicutes	Clostridia	Clostridiales	Eubacteriaceae	Eubacterium	Eubacterium plexicaudatum
1-1_GL0100276	1	1	0	0	0	0	0	0	0	0	0	Bacteria	Firmicutes	Clostridia	Clostridiales
1-1_GL0100797	1	0	0	0	0	0	0	0	0	0	0	Bacteria	Firmicutes	Clostridia	Clostridiales				N-acetyl-gamma-glutamyl-phosphate reductase (AGPR) (EC 1.2.1.38) (N-acetyl-glutamate semialdehyde dehydrogenase) (NAGSA dehydrogenase)	NAGSA dehydrogenase family, Type 1 subfamily	N-acetyl-gamma-glutamyl-phosphate reductase, type 1	[E] Amino acid transport and metabolism	L-arginine biosynthesis	K00145	1.2.1.38
11_GL0101033	0	0	0	0	0	0	0	0	0	0	1	Bacteria	Firmicutes	Clostridia	Clostridiales				2,3-bisphosphoglycerate-independent phosphoglycerate mutase (BPG-independent PGAM) (Phosphoglyceromutase) (iPGM) (EC 5.4.2.12)	BPG-independent phosphoglycerate mutase family	Phosphoglycerate mutase, 2,3-bisphosphoglycerate-independent	[G] Carbohydrate transport and metabolism	glycolysis	K15633	5.4.2.12
1-1_GL0101445	0	1	0	0	0	0	0	0	0	0	0	Bacteria	Firmicutes					Firmicutes bacterium ASF500	Glucosamine-6-phosphate deaminase (EC 3.5.99.6) (GlcN6P deaminase) (GNPDA) (Glucosamine-6-phosphate isomerase)	Glucosamine/galactosamine-6-phosphate isomerase family, NagB subfamily	Glucosamine-6-phosphate isomerase	[G] Carbohydrate transport and metabolism	N-acetylneuraminate degradation	K02564	3.5.99.6
1-1_GL0101526	1	0	0	0	0	0	0	0	0	0	0	Bacteria	Firmicutes						Enolase (EC 4.2.1.11) (2-phospho-D-glycerate hydro-lyase) (2-phosphoglycerate dehydratase)	Enolase family	Enolase	[G] Carbohydrate transport and metabolism	glycolysis	K01689	4.2.1.11
11_GL0101716	1	4	0	2	1	0	0	0	0	2	4	Bacteria	Firmicutes	Clostridia	Clostridiales				Short-chain-enoyl-CoA hydratase (EC 4.2.1.150) (3-hydroxybutyryl-CoA dehydratase) (Crotonase)	Enoyl-CoA hydratase/isomerase family		[I] Lipid transport and metabolism	butanoate metabolism	K01715	4.2.1.150
1-1_GL0102575	0	1	0	1	0	0	0	0	0	0	1	Bacteria	Firmicutes	Clostridia	Clostridiales	Lachnospiraceae			Elongation factor G (EF-G)	TRAFAC class translation factor GTPase superfamily, Classic translation factor GTPase family, EF-G/EF-2 subfamily	Translation elongation factor EFG/EF2	[J] Translation, ribosomal structure and biogenesis		K02355
1-1_GL0104702	0	0	0	0	0	0	1	0	0	0	0	Bacteria	Firmicutes
1-1_GL0105900	0	0	0	0	0	0	0	0	0	1	0	Bacteria	Firmicutes	Clostridia	Clostridiales				Small, acid-soluble spore protein beta (ASSP) (SASP)	Alpha/beta-type SASP family	Small acid-soluble spore protein, alpha/beta-type
1-1_GL0107823	0	0	0	0	0	0	0	1	0	0	0	Bacteria	Firmicutes	Clostridia	Clostridiales
11_GL0108888	0	2	0	2	0	0	0	0	0	0	0	Bacteria	Firmicutes	Clostridia	Clostridiales				Glycerol kinase (EC 2.7.1.30) (ATP:glycerol 3-phosphotransferase) (Glycerokinase) (GK)	FGGY kinase family	Glycerol kinase	[C] Energy production and conversion	glycerol degradation via glycerol kinase pathway	K00864	2.7.1.30
1-1_GL0109806	0	0	0	0	0	0	0	0	0	0	2	Bacteria	Firmicutes	Clostridia	Clostridiales	Ruminococcaceae	Gemmiger	Gemmiger formicilis
1-1_GL0110583	1	1	0	0	1	1	2	2	2	1	0	Bacteria	Bacteroidetes	Bacteroidia	Bacteroidales	Prevotellaceae	Prevotella				KDPG/KHG aldolase	[G] Carbohydrate transport and metabolism
1-1_GL0111104	0	0	0	0	0	0	0	0	0	2	1	Bacteria	Firmicutes	Clostridia	Clostridiales	Oscillospiraceae	Oscillibacter	Oscillibacter sp. 1-3
11_GL0111114	1	0	0	2	1	0	0	2	0	1	2	Bacteria	Firmicutes	Clostridia	Clostridiales				Uncharacterized protein YbhJ	Aconitase/IPM isomerase family		[C] Energy production and conversion		K01681
1-1_GL0111475	1	3	0	3	0	0	0	2	0	4	3	Bacteria	Firmicutes	Clostridia	Clostridiales	Lachnospiraceae		Lachnospiraceae bacterium 28-4
1-1_GL0111801	0	0	0	0	0	0	0	0	0	0	1	Bacteria	Firmicutes						30S ribosomal protein S8	Universal ribosomal protein uS8 family	Ribosomal protein S8	[J] Translation, ribosomal structure and biogenesis		K02994
11_GL0112360	0	0	0	0	0	0	0	0	0	0	1	Bacteria	Firmicutes	Clostridia	Clostridiales				Glycolate oxidase subunit GlcE			[C] Energy production and conversion		K11472
11_GL0112835	0	0	0	0	0	0	0	0	0	1	1	Bacteria	Firmicutes						Acetate kinase (EC 2.7.2.1) (Acetokinase)	Acetokinase family		[C] Energy production and conversion	acetyl-CoA biosynthesis	K00925	2.7.2.1
11_GL0113155	0	0	0	0	0	0	0	0	0	2	0	Bacteria	Firmicutes						UPF0145 protein Amet_0532	UPF0145 family
1-1_GL0114159	1	0	0	0	0	0	0	1	0	0	1	Bacteria	Firmicutes	Clostridia	Clostridiales						Peptide/nickel binding protein, MppA-type
1-1_GL0114307	1	0	0	1	0	0	0	1	0	2	2	Bacteria	Firmicutes	Clostridia	Clostridiales				Multiple sugar-binding periplasmic receptor ChvE	Bacterial solute-binding protein 2 family		[G] Carbohydrate transport and metabolism		K10546
1-1_GL0115215	0	0	0	0	0	0	0	0	0	0	1	Bacteria	Firmicutes	Clostridia	Clostridiales	Lachnospiraceae		Lachnospiraceae bacterium 28-4	Formate acetyltransferase 2 (EC 2.3.1.54) (Pyruvate formate-lyase 2)			[C] Energy production and conversion	pyruvate fermentation	K00656	2.3.1.54
1-1_GL0115228	0	1	0	0	0	0	0	0	0	1	1	Bacteria	Firmicutes	Clostridia	Clostridiales	Lachnospiraceae		Lachnospiraceae bacterium 28-4	Alcohol dehydrogenase (EC 1.1.1.1) (EC 1.1.1.4) (EC 1.2.1.3)	Zinc-containing alcohol dehydrogenase family		[E] Amino acid transport and metabolism			1.1.1.1
1-1_GL0115232	1	1	0	2	0	1	1	2	0	2	2	Bacteria	Firmicutes	Clostridia	Clostridiales	Lachnospiraceae		Lachnospiraceae bacterium 28-4	Propanediol utilization protein PduA	Bacterial microcompartments protein family
1-1_GL0115349	0	0	0	0	1	0	0	0	0	0	0	Bacteria	Bacteroidetes	Bacteroidia	Bacteroidales				Histidine ammonia-lyase (Histidase) (EC 4.3.1.3)	PAL/histidase family	Histidine ammonia-lyase	[E] Amino acid transport and metabolism	L-histidine degradation into L-glutamate	K01745	4.3.1.3
1-1_GL0116892	2	0	0	0	0	0	0	0	0	2	0	Bacteria	Firmicutes	Clostridia	Clostridiales				Putative sensory transducer protein		Chemotaxis methyl-accepting receptor			K03406
1-1_GL0116894	0	0	0	0	0	0	0	0	0	1	0	Bacteria	Firmicutes	Clostridia	Clostridiales	Lachnospiraceae			Chemotaxis protein CheA (EC 2.7.13.3)			[T] Signal transduction mechanisms		K03407	2.7.13.3
1-1_GL0117864	0	0	0	0	0	0	0	1	0	1	1	Bacteria	Firmicutes	Clostridia	Clostridiales	Lachnospiraceae			N-acetylglucosamine-6-phosphate deacetylase (GlcNAc 6-P deacetylase) (EC 3.5.1.25)	Metallo-dependent hydrolases superfamily, NagA family	N-acetylglucosamine-6-phosphate deacetylase	[G] Carbohydrate transport and metabolism	N-acetylneuraminate degradation	K01443	3.5.1.25
1-1_GL0119592	0	0	0	1	0	0	0	0	0	0	0	Bacteria	Spirochaetes	Spirochaetia	Spirochaetales	Spirochaetaceae	Treponema		Sialic acid-binding periplasmic protein SiaP (Extracytoplasmic solute receptor protein SiaP) (N-acetylneuraminic-binding protein) (Neu5Ac-binding protein)	Bacterial solute-binding protein 7 family		[G] Carbohydrate transport and metabolism
11_GL0119874	0	1	0	1	0	1	1	1	0	2	0	Bacteria	Firmicutes	Clostridia	Clostridiales				50S ribosomal protein L3	Universal ribosomal protein uL3 family	Ribosomal protein L3, bacterial/organelle-type	[J] Translation, ribosomal structure and biogenesis		K02906
11_GL0122736	9	7	4	6	6	4	5	6	4	5	6	Bacteria	Firmicutes	Clostridia	Clostridiales				Reverse rubrerythrin-1 (revRbr 1) (NADH peroxidase) (NPXase) (Npx) (EC 1.11.1.1) (Rubperoxin 1) (Rpr 1)		Leu/Ile/Val-binding protein	[C] Energy production and conversion			1.11.1.1
1-1_GL0123655	1	1	1	2	1	1	1	1	0	2	3	Bacteria	Firmicutes						Electron transfer flavoprotein subunit beta (Beta-ETF) (Electron transfer flavoprotein small subunit) (ETFSS)	ETF beta-subunit/FixA family	Electron transfer flavoprotein, beta subunit	[C] Energy production and conversion		K03521
1-1_GL0124184	0	0	0	0	0	0	0	0	0	1	0	Bacteria	Firmicutes	Clostridia	Clostridiales				Uncharacterized protein in adh 3'region			[C] Energy production and conversion
1-1_GL0124337	1	1	1	1	0	1	0	1	0	0	1	Bacteria	Firmicutes	Clostridia	Clostridiales				50S ribosomal protein L23	Universal ribosomal protein uL23 family		[J] Translation, ribosomal structure and biogenesis		K02892
1-1_GL0124338	0	1	0	0	0	0	0	0	0	0	0	Bacteria	Firmicutes	Clostridia	Clostridiales	Lachnospiraceae	Roseburia		50S ribosomal protein L2	Universal ribosomal protein uL2 family	Ribosomal protein L2, bacterial/organellar-type	[J] Translation, ribosomal structure and biogenesis		K02886
1-1_GL0125401	4	4	0	2	2	0	0	2	1	3	4	Bacteria	Firmicutes	Clostridia	Clostridiales				Phosphoglycerate kinase (EC 2.7.2.3)	Phosphoglycerate kinase family	Phosphoglycerate kinase	[G] Carbohydrate transport and metabolism	glycolysis	K00927	2.7.2.3
1-1_GL0125402	0	0	0	0	0	0	0	0	0	0	1	Bacteria	Firmicutes	Clostridia	Clostridiales	Lachnospiraceae			Triosephosphate isomerase (TIM) (TPI) (EC 5.3.1.1) (Triose-phosphate isomerase)	Triosephosphate isomerase family	Triosephosphate isomerase, bacterial/eukaryotic	[G] Carbohydrate transport and metabolism	gluconeogenesis	K01803	5.3.1.1
1-1_GL0125556	0	0	0	1	0	0	0	0	0	0	0	Bacteria	Firmicutes	Clostridia	Clostridiales	Lachnospiraceae						[G] Carbohydrate transport and metabolism
1-1_GL0126684	0	0	0	0	0	2	1	1	0	0	0
11_GL0127620	0	1	1	0	1	1	0	1	1	1	1	Bacteria	Firmicutes	Clostridia	Clostridiales				Serine hydroxymethyltransferase (SHMT) (Serine methylase) (EC 2.1.2.1)	SHMT family	Serine hydroxymethyltransferase	[E] Amino acid transport and metabolism	tetrahydrofolate interconversion	K00600	2.1.2.1
11_GL0128160	2	0	0	0	0	0	0	0	0	0	0	Bacteria	Firmicutes	Clostridia	Clostridiales	Lachnospiraceae		Lachnospiraceae bacterium A4
11_GL0128741	4	4	1	10	2	2	1	5	1	6	5	Bacteria	Firmicutes	Clostridia	Clostridiales				Acyl-CoA dehydrogenase, short-chain specific (EC 1.3.8.1) (Butyryl-CoA dehydrogenase) (SCAD)	Acyl-CoA dehydrogenase family	P-type ATPase, subfamily IB	[I] Lipid transport and metabolism	butanoate metabolism	K00248	1.3.8.1
1-1_GL0129557	0	0	0	0	0	0	0	0	0	0	1	Bacteria	Firmicutes	Clostridia	Clostridiales	Lachnospiraceae			Glycogen phosphorylase (EC 2.4.1.1)	Glycogen phosphorylase family	Glycogen/starch/alpha-glucan phosphorylase	[G] Carbohydrate transport and metabolism		K00688	2.4.1.1
11_GL0129611	1	1	0	1	1	1	1	1	0	3	1	Bacteria	Firmicutes	Clostridia	Clostridiales				30S ribosomal protein S2	Universal ribosomal protein uS2 family	Ribosomal protein S2, bacteria/mitochondria/plastid	[J] Translation, ribosomal structure and biogenesis		K02967
1-1_GL0130209	0	1	0	0	0	0	0	0	0	0	1	Bacteria	Firmicutes	Clostridia	Clostridiales	Lachnospiraceae			ATP synthase subunit beta (EC 3.6.3.14) (ATP synthase F1 sector subunit beta) (F-ATPase subunit beta)	ATPase alpha/beta chains family	ATPase, F1 complex, beta subunit	[C] Energy production and conversion		K02112	3.6.3.14
1-1_GL0130387	0	0	0	1	0	0	0	0	0	2	2	Bacteria	Firmicutes	Clostridia	Clostridiales	Lachnospiraceae	Roseburia	Roseburia sp. CAG:10041_57
11_GL0131219	0	0	0	0	0	0	1	0	0	0	0	Bacteria	Firmicutes	Clostridia	Clostridiales	Eubacteriaceae	Eubacterium	Eubacterium plexicaudatum	50S ribosomal protein L18	Universal ribosomal protein uL18 family		[J] Translation, ribosomal structure and biogenesis		K02881
1-1_GL0132065	0	0	0	0	0	0	0	1	0	0	2	Bacteria	Firmicutes	Clostridia	Clostridiales	Lachnospiraceae		Lachnospiraceae bacterium 28-4	Putative sensory transducer protein		Chemotaxis methyl-accepting receptor			K03406
1-1_GL0132075	0	0	0	0	0	0	0	0	0	0	1	Bacteria	Firmicutes	Clostridia	Clostridiales	Lachnospiraceae			NADP-specific glutamate dehydrogenase (NADP-GDH) (EC 1.4.1.4)	Glu/Leu/Phe/Val dehydrogenases family	Glutamate dehydrogenase	[E] Amino acid transport and metabolism		K00262	1.4.1.4
1-1_GL0134613	0	0	0	1	0	0	0	0	0	0	0	Bacteria	Firmicutes	Clostridia	Clostridiales	Lachnospiraceae			Glucose-1-phosphate adenylyltransferase (EC 2.7.7.27) (ADP-glucose pyrophosphorylase) (ADPGlc PPase) (ADP-glucose synthase)	Bacterial/plant glucose-1-phosphate adenylyltransferase family	Glucose-1-phosphate adenylyltransferase GlgC, bacterial	[G] Carbohydrate transport and metabolism	glycogen biosynthesis	K00975	2.7.7.27
1-1_GL0135553	0	0	0	0	1	0	0	0	1	1	0	Bacteria	Firmicutes	Clostridia	Clostridiales				Flagellin	Bacterial flagellin family	Flagellin	[N] Cell motility		K02406
11_GL0136523	6	6	2	5	2	2	2	7	2	7	7	Bacteria	Firmicutes	Clostridia	Clostridiales	Lachnospiraceae			Formate acetyltransferase (EC 2.3.1.54) (Pyruvate formate-lyase)		Formate acetyltransferase	[C] Energy production and conversion	pyruvate fermentation	K00656	2.3.1.54
1-1_GL0137416	3	1	0	1	0	0	0	1	0	1	1	Bacteria	Firmicutes	Clostridia	Clostridiales	Clostridiaceae	Clostridium		Phosphoenolpyruvate carboxykinase (ATP) 1 (PCK 1) (PEP carboxykinase 1) (PEPCK 1) (EC 4.1.1.49)	Phosphoenolpyruvate carboxykinase (ATP) family	Phosphoenolpyruvate carboxykinase, ATP-utilising	[C] Energy production and conversion	gluconeogenesis	K01610	4.1.1.49
1-1_GL0138615	0	0	0	0	0	0	0	0	0	1	0	Bacteria	Firmicutes	Clostridia	Clostridiales	Lachnospiraceae		Lachnospiraceae bacterium 28-4	Protein CobW	SIMIBI class G3E GTPase family, CobW subfamily	Cobalamin (vitamin B12) biosynthesis CobW		adenosylcobalamin biosynthesis
11_GL0139065	1	0	0	0	0	0	0	0	0	0	1	Bacteria	Firmicutes	Clostridia	Clostridiales	Lachnospiraceae		Lachnospiraceae bacterium 3-2	Putative flagellin YvzB	Bacterial flagellin family	Flagellin	[N] Cell motility		K02406
11_GL0140632	0	0	0	0	0	0	0	1	0	0	0	Bacteria	Firmicutes	Clostridia	Clostridiales				Propionyl-CoA carboxylase beta chain (PCCase) (EC 6.4.1.3) (Propanoyl-CoA:carbon dioxide ligase)	AccD/PCCB family		[I] Lipid transport and metabolism	propanoyl-CoA degradation	K01966	6.4.1.3
1-1_GL0141257	0	0	0	0	0	0	0	0	0	0	1	Bacteria	Firmicutes	Clostridia	Clostridiales	Lachnospiraceae		Lachnospiraceae bacterium A4	Putative methyl-accepting chemotaxis protein YoaH		Chemotaxis methyl-accepting receptor
1-1_GL0141621	0	1	0	0	0	0	0	0	0	0	0	Bacteria	Bacteroidetes	Bacteroidia	Bacteroidales	Prevotellaceae	Prevotella		30S ribosomal protein S13	Universal ribosomal protein uS13 family	Ribosomal protein S13, bacterial-type	[J] Translation, ribosomal structure and biogenesis		K02952
1-1_GL0141777	0	0	0	1	0	0	0	0	0	0	1	Bacteria	Firmicutes						Cell surface glycoprotein 2 (S-layer protein 2)
11_GL0141839	0	0	0	0	0	0	0	2	0	0	0	Bacteria	Firmicutes	Clostridia	Clostridiales	Eubacteriaceae	Eubacterium	Eubacterium sp. 14-2				[E] Amino acid transport and metabolism
11_GL0142158	0	0	0	0	0	0	0	0	0	0	1	Bacteria	Firmicutes	Clostridia	Clostridiales				Protein AegA			[E] Amino acid transport and metabolism
1-1_GL0142511	0	0	0	0	0	0	0	0	0	2	5	Bacteria	Firmicutes	Clostridia	Clostridiales				Pyruvate, phosphate dikinase (EC 2.7.9.1) (Pyruvate, orthophosphate dikinase)	PEP-utilizing enzyme family	Pyruvate, phosphate dikinase	[G] Carbohydrate transport and metabolism			2.7.9.1
11_GL0143116	0	0	0	0	0	0	0	0	0	0	2	Bacteria	Firmicutes	Clostridia	Clostridiales	Lachnospiraceae			Flagellin (Fragment)	Bacterial flagellin family	Flagellin
1-1_GL0143228	0	0	1	0	1	0	0	0	0	0	0	Bacteria	Firmicutes	Clostridia	Clostridiales	Lachnospiraceae						[G] Carbohydrate transport and metabolism
1-1_GL0143405	0	0	0	0	1	0	0	0	0	0	0	Bacteria	Bacteroidetes	Bacteroidia	Bacteroidales				Probable glycine dehydrogenase (decarboxylating) subunit 2 (EC 1.4.4.2) (Glycine cleavage system P-protein subunit 2) (Glycine decarboxylase subunit 2) (Glycine dehydrogenase (aminomethyl-transferring) subunit 2)	GcvP family, C-terminal subunit subfamily	Probable glycine dehydrogenase (decarboxylating) subunit 2	[E] Amino acid transport and metabolism		K00283	1.4.4.2
11_GL0143615	0	1	0	0	0	0	0	0	0	1	2	Bacteria	Firmicutes	Clostridia	Clostridiales				Fructose-bisphosphate aldolase (FBP aldolase) (FBPA) (EC 4.1.2.13) (Fructose-1,6-bisphosphate aldolase)	Class II fructose-bisphosphate aldolase family	Fructose-1,6-bisphosphate aldolase, class 2	[G] Carbohydrate transport and metabolism	glycolysis	K01624	4.1.2.13
1-1_GL0144133	0	0	0	0	0	1	0	0	0	0	0
1-1_GL0144153	0	0	0	1	0	0	0	0	0	0	0	Bacteria	Bacteroidetes	Bacteroidia	Bacteroidales	Prevotellaceae	Prevotella	Prevotella sp. CAG:485	Cytosol non-specific dipeptidase (EC 3.4.13.18) (Aminoacyl-histidine dipeptidase) (Beta-alanyl-histidine dipeptidase) (Carnosinase) (Cysteinylglycinase) (Peptidase D) (Xaa-His dipeptidase) (X-His dipeptidase)	Peptidase M20C family		[E] Amino acid transport and metabolism		K01270	3.4.13.18
1-1_GL0144185	1	0	0	0	0	0	0	0	0	0	0	Bacteria	Firmicutes	Clostridia	Clostridiales				UPF0145 protein NT01CX_0170	UPF0145 family
1-1_GL0144582	0	0	0	0	0	0	0	0	0	0	1	Bacteria	Firmicutes	Clostridia	Clostridiales	Lachnospiraceae						[G] Carbohydrate transport and metabolism
1-1_GL0144660	2	3	0	2	0	0	0	1	0	3	2	Bacteria	Firmicutes	Clostridia	Clostridiales				Electron transfer flavoprotein subunit beta (Beta-ETF) (Electron transfer flavoprotein small subunit) (ETFSS)	ETF beta-subunit/FixA family	Electron transfer flavoprotein, beta subunit	[C] Energy production and conversion		K03521
1-1_GL0144661	1	2	0	1	0	0	0	0	0	0	2	Bacteria	Firmicutes	Clostridia	Clostridiales	Lachnospiraceae			Acyl-CoA dehydrogenase, short-chain specific (EC 1.3.8.1) (Butyryl-CoA dehydrogenase) (SCAD)	Acyl-CoA dehydrogenase family		[I] Lipid transport and metabolism	butanoate metabolism	K00248	1.3.8.1
1-1_GL0145735	4	2	0	2	0	0	0	3	0	1	2	Bacteria	Firmicutes	Clostridia	Clostridiales	Oscillospiraceae	Oscillibacter		Lysine 5,6-aminomutase alpha subunit (5,6-LAM) (EC 5.4.3.3) (D-lysine 5,6-aminomutase alpha subunit) (L-beta-lysine 5,6-aminomutase alpha subunit)	KamD family			lysine degradation	K01844	5.4.3.3
1-1_GL0146495	1	1	0	1	0	0	0	2	0	2	3	Bacteria	Firmicutes						Chaperone protein DnaK (HSP70) (Heat shock 70 kDa protein) (Heat shock protein 70)	Heat shock protein 70 family	Heat shock protein 70 family	[O] Posttranslational modification, protein turnover, chaperones		K04043
1-1_GL0146641	0	0	0	0	0	1	1	0	0	0	0	Bacteria	Bacteroidetes	Bacteroidia	Bacteroidales	Prevotellaceae	Prevotella				Gram-negative bacterial TonB protein
1-1_GL0149410	1	0	0	0	0	0	0	0	0	0	1	Bacteria	Firmicutes	Clostridia	Clostridiales				Uncharacterized protein TP_0007
11_GL0149811	0	0	0	1	0	0	0	0	0	1	1	Bacteria	Firmicutes	Clostridia	Clostridiales	Eubacteriaceae	Eubacterium	Eubacterium sp. 14-2	Putative sensory transducer protein		Chemotaxis methyl-accepting receptor			K03406
1-1_GL0149924	1	1	0	1	0	0	0	1	0	1	1	Bacteria	Firmicutes						Glycogen phosphorylase (EC 2.4.1.1)	Glycogen phosphorylase family	Glycogen/starch/alpha-glucan phosphorylase	[G] Carbohydrate transport and metabolism		K00688	2.4.1.1
1-1_GL0149965	0	0	0	0	0	0	0	0	0	0	1	Bacteria	Firmicutes	Clostridia	Clostridiales	Lachnospiraceae			Glucose-1-phosphate adenylyltransferase (EC 2.7.7.27) (ADP-glucose pyrophosphorylase) (ADPGlc PPase) (ADP-glucose synthase)	Bacterial/plant glucose-1-phosphate adenylyltransferase family	Glucose-1-phosphate adenylyltransferase GlgC, bacterial	[G] Carbohydrate transport and metabolism	glycogen biosynthesis	K00975	2.7.7.27
1-1_GL0150368	0	0	0	0	0	0	0	0	0	1	1	Bacteria	Firmicutes	Clostridia	Clostridiales	Lachnospiraceae			Elongation factor G (EF-G)	TRAFAC class translation factor GTPase superfamily, Classic translation factor GTPase family, EF-G/EF-2 subfamily	Translation elongation factor EFG/EF2	[J] Translation, ribosomal structure and biogenesis		K02355
11_GL0151170	1	0	0	0	0	0	0	0	0	0	1	Bacteria	Firmicutes	Clostridia	Clostridiales	Eubacteriaceae	Eubacterium	Eubacterium plexicaudatum	Propanediol utilization protein PduA	Bacterial microcompartments protein family		[E] Amino acid transport and metabolism
1-1_GL0151427	0	0	0	0	0	1	0	0	0	0	0	Bacteria	Bacteroidetes	Bacteroidia	Bacteroidales
1-1_GL0151610	0	1	0	0	0	0	0	0	0	0	0	Bacteria	Firmicutes						50S ribosomal protein L27	Bacterial ribosomal protein bL27 family	Ribosomal protein L27	[J] Translation, ribosomal structure and biogenesis		K02899
1-1_GL0151637	1	0	0	0	1	0	0	0	0	0	0	Bacteria	Firmicutes	Clostridia	Clostridiales				Probable Hsp20 family chaperone	Small heat shock protein (HSP20) family	Small heat shock protein HSP20	[O] Posttranslational modification, protein turnover, chaperones
11_GL0153046	1	4	0	2	1	0	0	2	0	1	2	Bacteria	Firmicutes	Clostridia	Clostridiales				3-hydroxybutyryl-CoA dehydrogenase (EC 1.1.1.157) (Beta-hydroxybutyryl-CoA dehydrogenase) (BHBD)	3-hydroxyacyl-CoA dehydrogenase family	3-hydroxyacyl-CoA dehydrogenase	[I] Lipid transport and metabolism	butanoate metabolism	K00074	1.1.1.157
11_GL0153929	1	1	0	1	0	0	0	0	0	1	0	Bacteria	Firmicutes	Clostridia	Clostridiales				30S ribosomal protein S15	Universal ribosomal protein uS15 family	Ribosomal protein S15, bacterial-type	[J] Translation, ribosomal structure and biogenesis		K02956
11_GL0154552	1	0	0	1	0	0	0	1	0	1	0	Bacteria	Firmicutes						Phosphoserine aminotransferase (EC 2.6.1.52) (Phosphohydroxythreonine aminotransferase) (PSAT)	Class-V pyridoxal-phosphate-dependent aminotransferase family, SerC subfamily	Phosphoserine aminotransferase	[E] Amino acid transport and metabolism	L-serine biosynthesis	K00831	2.6.1.52
11_GL0155906	1	0	0	0	0	1	1	1	1	1	0	Bacteria	Firmicutes	Erysipelotrichia	Erysipelotrichales	Erysipelotrichaceae	Faecalibaculum	Faecalibaculum rodentium	Desulfoferrodoxin (Dfx) (EC 1.15.1.2) (Superoxide reductase) (SOR)	Desulfoferrodoxin family		[C] Energy production and conversion		K05919	1.15.1.2
11_GL0158488	0	0	0	0	0	0	0	0	0	0	1	Bacteria	Firmicutes	Clostridia	Clostridiales				10 kDa chaperonin (GroES protein) (Protein Cpn10)	GroES chaperonin family	Chaperonin Cpn10	[O] Posttranslational modification, protein turnover, chaperones		K04078
11_GL0158489	4	2	2	2	3	3	3	1	1	3	5	Bacteria	Firmicutes	Clostridia	Clostridiales				60 kDa chaperonin (GroEL protein) (Protein Cpn60)	Chaperonin (HSP60) family		[O] Posttranslational modification, protein turnover, chaperones		K04077
11_GL0159824	0	0	0	0	0	0	0	0	0	0	1	Bacteria	Firmicutes	Clostridia	Clostridiales	Eubacteriaceae	Eubacterium	Eubacterium plexicaudatum	Putative sensory transducer protein		Chemotaxis methyl-accepting receptor			K03406
11_GL0160478	0	0	0	0	0	0	0	0	0	0	1	Bacteria	Firmicutes	Clostridia	Clostridiales				Uncharacterized protein YceH	TelA family		[P] Inorganic ion transport and metabolism
11_GL0161386	0	1	0	2	0	0	0	0	0	0	0	Bacteria	Firmicutes	Clostridia	Clostridiales				30S ribosomal protein S19	Universal ribosomal protein uS19 family	Ribosomal protein S19, bacterial-type	[J] Translation, ribosomal structure and biogenesis		K02965
1-2_GL0001640	0	1	0	1	0	0	0	1	0	0	0	Bacteria	Firmicutes	Bacilli	Lactobacillales	Streptococcaceae	Lactococcus		Phosphoglycerate kinase (EC 2.7.2.3)	Phosphoglycerate kinase family	Phosphoglycerate kinase	[G] Carbohydrate transport and metabolism	glycolysis	K00927	2.7.2.3
1-2_GL0002789	0	0	0	0	0	0	0	0	0	0	3	Bacteria							Flagellin (Fragment)	Bacterial flagellin family	Flagellin	[N] Cell motility
1-2_GL0003673	0	1	0	0	5	0	0	0	0	1	7	Bacteria	Firmicutes
1-2_GL0004127	0	1	0	0	0	0	0	0	0	0	0	Bacteria	Firmicutes	Clostridia	Clostridiales				Maltodextrin import ATP-binding protein MsmX (EC 3.6.3.-)	ABC transporter superfamily		[G] Carbohydrate transport and metabolism		K10112	3.6.3.-
1-2_GL0004991	0	0	0	1	0	0	0	0	0	0	0	Bacteria	Firmicutes						50S ribosomal protein L23	Universal ribosomal protein uL23 family		[J] Translation, ribosomal structure and biogenesis		K02892
1-2_GL0005357	1	1	0	0	0	0	0	1	0	0	0	Bacteria	Firmicutes	Clostridia	Clostridiales				Pyruvate-flavodoxin oxidoreductase (EC 1.2.7.-)	NifJ family	Pyruvate-flavodoxin oxidoreductase	[C] Energy production and conversion			1.2.7.-
1-2_GL0010139	0	0	0	0	0	0	0	0	0	0	1	Bacteria	Firmicutes	Clostridia	Clostridiales				Ketol-acid reductoisomerase (NADP(+)) (KARI) (EC 1.1.1.86) (Acetohydroxy-acid isomeroreductase) (AHIR) (Alpha-keto-beta-hydroxylacyl reductoisomerase) (Ketol-acid reductoisomerase type 1) (Ketol-acid reductoisomerase type I)	Ketol-acid reductoisomerase family			L-isoleucine biosynthesis	K00053	1.1.1.86
1-2_GL0012434	0	0	0	0	0	0	0	0	0	1	0	Bacteria	Firmicutes	Clostridia	Clostridiales	Oscillospiraceae	Oscillibacter	Oscillibacter sp. 1-3	Putative flagellin YvzB	Bacterial flagellin family	Flagellin			K02406
1-2_GL0013015	0	2	1	3	0	0	0	2	0	1	8	Bacteria	Firmicutes	Clostridia	Clostridiales	Lachnospiraceae	Roseburia					[G] Carbohydrate transport and metabolism
1-2_GL0016953	0	0	0	0	0	0	0	0	0	0	3	Bacteria	Firmicutes	Clostridia	Clostridiales				Pyruvate, phosphate dikinase (EC 2.7.9.1) (Pyruvate, orthophosphate dikinase)	PEP-utilizing enzyme family	Pyruvate, phosphate dikinase	[G] Carbohydrate transport and metabolism			2.7.9.1
1-2_GL0019552	0	0	0	0	0	0	0	0	0	1	1	Bacteria	Firmicutes
1-2_GL0034244	0	0	0	1	0	0	0	0	0	0	0	Bacteria	Firmicutes	Clostridia	Clostridiales				Phosphoglucomutase (PGM) (EC 5.4.2.2) (Alpha-phosphoglucomutase) (Glucose phosphomutase)	Phosphohexose mutase family		[G] Carbohydrate transport and metabolism	diglucosyl-diacylglycerol biosynthesis	K01835	5.4.2.2
1-2_GL0039517	0	0	0	1	0	0	0	0	0	1	0	Bacteria	Firmicutes	Clostridia	Clostridiales				50S ribosomal protein L10	Universal ribosomal protein uL10 family	Ribosomal protein L10	[J] Translation, ribosomal structure and biogenesis		K02864
1-2_GL0040227	0	1	0	1	0	0	0	1	0	1	0	Bacteria	Firmicutes						UPF0145 protein Amet_0532	UPF0145 family
1-2_GL0042138	2	1	0	2	1	0	0	1	0	2	2	Bacteria	Firmicutes	Clostridia	Clostridiales				60 kDa chaperonin (GroEL protein) (Protein Cpn60)	Chaperonin (HSP60) family		[O] Posttranslational modification, protein turnover, chaperones		K04077
1-2_GL0046055	0	0	0	0	0	0	0	0	0	0	1	Bacteria	Firmicutes	Clostridia	Clostridiales				Fructose-bisphosphate aldolase (FBP aldolase) (FBPA) (EC 4.1.2.13) (Fructose-1,6-bisphosphate aldolase)	Class II fructose-bisphosphate aldolase family	Fructose-1,6-bisphosphate aldolase, class 2	[G] Carbohydrate transport and metabolism	glycolysis	K01624	4.1.2.13
1-2_GL0048689	4	3	0	5	2	2	2	2	0	6	6	Bacteria	Firmicutes	Clostridia	Clostridiales	Lachnospiraceae		Lachnospiraceae bacterium 28-4	Propanediol utilization protein PduA	Bacterial microcompartments protein family
1-2_GL0048691	0	1	0	1	0	0	0	0	0	1	0	Bacteria	Firmicutes	Clostridia	Clostridiales	Lachnospiraceae			Propanediol utilization protein PduA	Bacterial microcompartments protein family		[E] Amino acid transport and metabolism
1-2_GL0048971	0	0	0	0	1	0	1	0	0	0	0	Bacteria	Bacteroidetes	Bacteroidia	Bacteroidales				Neutral endopeptidase (EC 3.4.24.-) (Endopeptidase O)	Peptidase M13 family		[O] Posttranslational modification, protein turnover, chaperones			3.4.24.-
1-2_GL0050382	3	1	0	0	0	0	0	0	0	1	0	Bacteria	Firmicutes	Clostridia	Clostridiales		Flavonifractor		4-hydroxybutyrate coenzyme A transferase (EC 2.8.3.-)	Acetyl-CoA hydrolase/transferase family	Butyryl-CoA:acetate CoA-transferase	[C] Energy production and conversion		K18122	2.8.3.-
1-2_GL0053846	3	0	0	0	0	0	0	3	0	2	0	Bacteria	Firmicutes	Clostridia	Clostridiales				Xylulose kinase (Xylulokinase) (EC 2.7.1.17)	FGGY kinase family	Xylulokinase	[G] Carbohydrate transport and metabolism		K00854	2.7.1.17
1-2_GL0056662	0	0	0	0	0	0	0	0	0	1	1	Bacteria	Firmicutes						ATP synthase subunit alpha (EC 3.6.3.14) (ATP synthase F1 sector subunit alpha) (F-ATPase subunit alpha)	ATPase alpha/beta chains family		[C] Energy production and conversion		K02111	3.6.3.14
1-2_GL0058723	2	2	1	2	1	0	1	2	0	1	1	Bacteria	Firmicutes	Clostridia	Clostridiales				Pyrophosphate--fructose 6-phosphate 1-phosphotransferase (EC 2.7.1.90) (6-phosphofructokinase, pyrophosphate dependent) (PPi-dependent phosphofructokinase) (PPi-PFK) (Pyrophosphate-dependent 6-phosphofructose-1-kinase)	Phosphofructokinase type A (PFKA) family, PPi-dependent PFK group II subfamily, Clade "B2" sub-subfamily	ATP-dependent 6-phosphofructokinase	[G] Carbohydrate transport and metabolism	glycolysis	K21071	2.7.1.90
1-2_GL0060334	1	0	0	0	1	0	0	0	0	1	1	Bacteria	Firmicutes						Maltodextrin import ATP-binding protein MsmX (EC 3.6.3.-)	ABC transporter superfamily		[G] Carbohydrate transport and metabolism		K10112	3.6.3.-
1-2_GL0061314	0	0	0	1	1	0	0	1	0	0	1	Bacteria	Firmicutes						Ornithine carbamoyltransferase, catabolic (OTCase) (EC 2.1.3.3)	ATCase/OTCase family	Ornithine carbamoyltransferase	[E] Amino acid transport and metabolism	L-arginine degradation via ADI pathway	K00611	2.1.3.3
1-2_GL0061797	0	0	0	0	1	0	0	0	1	1	0	Bacteria	Firmicutes	Clostridia	Clostridiales	Lachnospiraceae
1-2_GL0064741	0	1	0	0	0	0	0	0	0	0	1	Bacteria	Firmicutes	Clostridia	Clostridiales				Triosephosphate isomerase (TIM) (TPI) (EC 5.3.1.1) (Triose-phosphate isomerase)	Triosephosphate isomerase family	Triosephosphate isomerase, bacterial/eukaryotic	[G] Carbohydrate transport and metabolism	gluconeogenesis	K01803	5.3.1.1
1-2_GL0065784	0	0	1	0	0	0	0	0	0	1	1	Bacteria	Firmicutes	Clostridia	Clostridiales				Phosphate acetyltransferase (EC 2.3.1.8) (Phosphotransacetylase)	Phosphate acetyltransferase and butyryltransferase family		[C] Energy production and conversion	acetyl-CoA biosynthesis	K00625	2.3.1.8
1-2_GL0066956	0	3	0	1	0	1	0	1	0	4	3	Bacteria	Firmicutes	Clostridia	Clostridiales	Lachnospiraceae			Uncharacterized zinc-type alcohol dehydrogenase-like protein YphC (EC 1.-.-.-)	Zinc-containing alcohol dehydrogenase family		[C] Energy production and conversion			1.-.-.-
1-2_GL0067118	2	2	0	1	0	0	0	0	0	0	2	Bacteria	Firmicutes						Acetyl-CoA acetyltransferase (EC 2.3.1.9) (Acetoacetyl-CoA thiolase)	Thiolase family		[I] Lipid transport and metabolism	(R)-mevalonate biosynthesis	K00626	2.3.1.9
1-2_GL0067606	2	1	3	3	3	2	2	1	1	1	1	Bacteria	Bacteroidetes	Bacteroidia	Bacteroidales				NAD-specific glutamate dehydrogenase (NAD-GDH) (EC 1.4.1.2) (NADH-dependent glutamate dehydrogenase)	Glu/Leu/Phe/Val dehydrogenases family	Glutamate dehydrogenase	[E] Amino acid transport and metabolism		K00262	1.4.1.2
1-2_GL0070538	0	0	0	0	0	1	1	0	0	0	0	Bacteria	Bacteroidetes	Bacteroidia	Bacteroidales				30S ribosomal protein S16	Bacterial ribosomal protein bS16 family	Ribosomal protein S16	[J] Translation, ribosomal structure and biogenesis		K02959
1-2_GL0073938	0	0	0	1	0	0	0	0	0	0	0	Bacteria	Firmicutes	Clostridia	Clostridiales	Lachnospiraceae		Lachnospiraceae bacterium 10-1				[G] Carbohydrate transport and metabolism
1-2_GL0075518	0	0	0	1	0	0	0	0	0	0	0	Bacteria	Firmicutes	Clostridia	Clostridiales				Carbohydrate diacid regulator (Sugar diacid regulator)	CdaR family		[K] Transcription		K02647
1-2_GL0078720	2	1	2	1	3	2	1	2	1	2	2	Bacteria	Firmicutes	Bacilli	Lactobacillales	Streptococcaceae			Enolase (EC 4.2.1.11) (2-phospho-D-glycerate hydro-lyase) (2-phosphoglycerate dehydratase)	Enolase family	Enolase	[G] Carbohydrate transport and metabolism	glycolysis	K01689	4.2.1.11
1-2_GL0079531	0	1	0	0	0	0	0	0	0	0	0	Bacteria	Bacteroidetes	Bacteroidia	Bacteroidales				TonB-dependent receptor SusC (Starch-utilization system protein C)	TonB-dependent receptor family		[P] Inorganic ion transport and metabolism	starch degradation	K21573
1-2_GL0079681	0	0	0	3	0	0	0	0	0	0	0	Bacteria	Firmicutes								Peptide/nickel binding protein, MppA-type	[E] Amino acid transport and metabolism
1-2_GL0080682	1	2	0	0	0	1	0	1	1	1	1	Bacteria	Firmicutes						Propanediol utilization protein PduA	Bacterial microcompartments protein family		[E] Amino acid transport and metabolism
1-2_GL0080836	0	0	0	0	0	0	0	0	0	0	1	Bacteria	Firmicutes	Clostridia	Clostridiales				Probable ABC transporter permease protein y4oR	Binding-protein-dependent transport system permease family, MalFG subfamily		[G] Carbohydrate transport and metabolism		K02026
1-2_GL0081287	0	0	0	0	0	0	0	0	0	1	0	Bacteria	Firmicutes	Clostridia	Clostridiales	Lachnospiraceae	Blautia					[E] Amino acid transport and metabolism
1-2_GL0086064	0	0	0	0	0	0	0	0	0	2	0	Bacteria	Firmicutes	Clostridia	Clostridiales							[G] Carbohydrate transport and metabolism
1-2_GL0086390	0	1	0	0	0	0	0	1	0	1	0	Bacteria	Firmicutes	Clostridia	Clostridiales				Acetyl-CoA acetyltransferase (EC 2.3.1.9) (Acetoacetyl-CoA thiolase)	Thiolase family		[I] Lipid transport and metabolism	(R)-mevalonate biosynthesis	K00626	2.3.1.9
1-2_GL0086395	0	0	0	1	0	0	0	0	0	0	0	Bacteria	Firmicutes	Clostridia	Clostridiales	Lachnospiraceae			Protein FixB	ETF alpha-subunit/FixB family	Electron transfer flavoprotein, alpha subunit	[C] Energy production and conversion
1-2_GL0088364	4	5	4	6	5	1	2	3	2	3	4	Bacteria	Firmicutes	Clostridia	Clostridiales	Lachnospiraceae	Roseburia	Roseburia intestinalis	B-type flagellin	Bacterial flagellin family	Flagellin	[N] Cell motility		K02406
1-2_GL0088399	0	0	1	0	0	0	0	0	0	0	0
1-2_GL0090986	1	1	0	0	0	0	0	1	0	2	1	Bacteria	Firmicutes	Clostridia	Clostridiales				Probable butyrate kinase (BK) (EC 2.7.2.7) (Branched-chain carboxylic acid kinase)	Acetokinase family	Butyrate kinase	[C] Energy production and conversion		K00929	2.7.2.7
1-2_GL0091173	0	1	0	1	0	0	0	0	0	1	0	Bacteria	Firmicutes	Clostridia	Clostridiales	Lachnospiraceae	Roseburia		50S ribosomal protein L7/L12	Bacterial ribosomal protein bL12 family	Ribosomal protein L7/L12	[J] Translation, ribosomal structure and biogenesis		K02935
1-2_GL0092206	0	1	0	0	0	0	0	0	0	0	0	Bacteria	Firmicutes						Ethanolamine utilization protein EutE			[C] Energy production and conversion	ethanolamine degradation	K04021
1-2_GL0095952	0	0	0	0	0	0	0	1	0	2	2	Bacteria	Firmicutes	Clostridia	Clostridiales	Lachnospiraceae			Pyruvate, phosphate dikinase (EC 2.7.9.1) (Pyruvate, orthophosphate dikinase)	PEP-utilizing enzyme family	Pyruvate, phosphate dikinase	[G] Carbohydrate transport and metabolism			2.7.9.1
1-2_GL0098002	1	2	0	2	0	0	0	2	0	2	4	Bacteria	Firmicutes	Clostridia	Clostridiales				Cellobiose phosphorylase (EC 2.4.1.20)	Glycosyl hydrolase 94 family			cellulose degradation	K00702	2.4.1.20
1-2_GL0098316	0	0	0	0	0	0	0	0	0	1	0	Bacteria	Firmicutes									[G] Carbohydrate transport and metabolism
1-2_GL0098543	0	1	1	1	0	0	0	1	0	0	1	Bacteria	Firmicutes	Clostridia	Clostridiales						Conserved hypothetical protein CHP02241
1-2_GL0100967	1	1	2	1	0	0	0	0	0	4	1	Bacteria	Proteobacteria	Alphaproteobacteria	Rhizobiales	Aurantimonadaceae	Aureimonas		Flagellin (Fragment)	Bacterial flagellin family	Flagellin	[N] Cell motility
1-2_GL0101012	0	0	0	0	0	0	0	0	0	1	0	Bacteria	Firmicutes	Clostridia	Clostridiales				4-O-beta-D-mannosyl-D-glucose phosphorylase (MGP) (Mannosylglucose phosphorylase) (EC 2.4.1.281) (RaMP1)	Glycosyl hydrolase 130 family	4-O-beta-D-mannosyl-D-glucose phosphorylase	[G] Carbohydrate transport and metabolism		K16212	2.4.1.281
1-2_GL0103656	0	1	0	0	0	0	0	0	0	0	0	Bacteria	Firmicutes						D-lactate dehydrogenase (D-LDH) (EC 1.1.1.28) (Fermentative lactate dehydrogenase)	D-isomer specific 2-hydroxyacid dehydrogenase family		[C] Energy production and conversion		K03778	1.1.1.28
1-2_GL0106009	0	0	0	0	0	0	0	0	0	1	0	Bacteria	Firmicutes						Pyruvate, phosphate dikinase (EC 2.7.9.1) (Pyruvate, orthophosphate dikinase)	PEP-utilizing enzyme family	Pyruvate, phosphate dikinase	[G] Carbohydrate transport and metabolism			2.7.9.1
1-2_GL0110297	1	5	0	4	1	2	1	4	0	4	6	Bacteria	Firmicutes	Clostridia	Clostridiales	Lachnospiraceae		Lachnospiraceae bacterium 28-4				[G] Carbohydrate transport and metabolism
1-2_GL0110472	0	0	0	1	0	0	0	0	0	0	0	Bacteria	Firmicutes	Clostridia	Clostridiales	Lachnospiraceae		Lachnospiraceae bacterium 10-1				[G] Carbohydrate transport and metabolism
1-2_GL0112586	0	0	0	1	0	0	0	0	0	0	1	Bacteria	Firmicutes									[G] Carbohydrate transport and metabolism
1-2_GL0113170	2	2	0	0	0	0	0	1	0	0	2	Bacteria	Firmicutes	Clostridia	Clostridiales				Electron transfer flavoprotein subunit beta (Beta-ETF) (Electron transfer flavoprotein small subunit) (ETFSS)	ETF beta-subunit/FixA family	Electron transfer flavoprotein, beta subunit	[C] Energy production and conversion		K03521
1-2_GL0113636	0	0	0	0	0	0	0	0	0	2	0	Bacteria	Bacteroidetes	Flavobacteriia	Flavobacteriales
1-2_GL0115358	0	0	0	0	0	0	0	0	0	0	1	Bacteria	Firmicutes						Acyl-CoA dehydrogenase, short-chain specific (EC 1.3.8.1) (Butyryl-CoA dehydrogenase) (SCAD)	Acyl-CoA dehydrogenase family		[I] Lipid transport and metabolism	butanoate metabolism	K00248	1.3.8.1
1-2_GL0115440	0	1	0	1	0	0	0	1	0	1	1	Bacteria	Firmicutes	Clostridia	Clostridiales				Protein FixB	ETF alpha-subunit/FixB family	Electron transfer flavoprotein, alpha subunit	[C] Energy production and conversion
1-2_GL0117033	1	0	0	0	0	0	0	1	0	1	1	Bacteria	Firmicutes	Clostridia	Clostridiales	Clostridiaceae	Clostridium	Clostridium sp. CAG:1024				[C] Energy production and conversion
1-2_GL0119140	1	1	0	0	0	0	0	1	0	1	1	Bacteria	Firmicutes	Clostridia	Clostridiales	Clostridiaceae	Clostridium	Clostridium sp. CAG:1024	Bifunctional protein FolD [Includes: Methylenetetrahydrofolate dehydrogenase (EC 1.5.1.5); Methenyltetrahydrofolate cyclohydrolase (EC 3.5.4.9)]	Tetrahydrofolate dehydrogenase/cyclohydrolase family	Tetrahydrofolate dehydrogenase/cyclohydrolase	[H] Coenzyme transport and metabolism	tetrahydrofolate interconversion	K01491	1.5.1.5
1-2_GL0120656	0	0	0	0	0	0	0	0	1	0	0	Bacteria	Firmicutes	Clostridia	Clostridiales	Lachnospiraceae	Dorea		D-galactose-binding periplasmic protein (GBP) (D-galactose/ D-glucose-binding protein) (GGBP)	Bacterial solute-binding protein 2 family		[G] Carbohydrate transport and metabolism		K10540
1-2_GL0126518	0	0	0	0	0	0	0	0	0	0	1	Bacteria	Firmicutes	Clostridia	Clostridiales	Lachnospiraceae			Protein LacX, plasmid			[G] Carbohydrate transport and metabolism
1-2_GL0129193	2	0	0	0	0	0	0	0	0	1	0	Bacteria	Firmicutes	Clostridia	Clostridiales							[G] Carbohydrate transport and metabolism
1-2_GL0129659	0	0	0	1	0	0	0	0	0	0	0	Bacteria	Firmicutes	Clostridia	Clostridiales	Lachnospiraceae	Butyrivibrio	Butyrivibrio proteoclasticus	Pyruvate, phosphate dikinase (EC 2.7.9.1) (Pyruvate, orthophosphate dikinase)	PEP-utilizing enzyme family	Pyruvate, phosphate dikinase	[G] Carbohydrate transport and metabolism			2.7.9.1
1-2_GL0129942	2	1	0	2	1	0	0	0	0	2	2	Bacteria	Firmicutes	Clostridia	Clostridiales				Formate acetyltransferase (EC 2.3.1.54) (Pyruvate formate-lyase)			[C] Energy production and conversion	pyruvate fermentation	K00656	2.3.1.54
13_GL0003413	0	1	0	0	0	0	0	0	0	1	1	Bacteria	Firmicutes						Acetyl-CoA acetyltransferase (EC 2.3.1.9) (Acetoacetyl-CoA thiolase)	Thiolase family		[I] Lipid transport and metabolism	(R)-mevalonate biosynthesis	K00626	2.3.1.9
13_GL0009059	0	0	0	0	0	0	1	0	0	0	0	Bacteria	Bacteroidetes	Bacteroidia	Bacteroidales	Bacteroidaceae	Bacteroides	Bacteroides sp. CAG:927
1-3_GL0011727	2	0	0	0	0	0	0	0	0	1	0	Bacteria	Firmicutes								Peptide/nickel binding protein, MppA-type	[E] Amino acid transport and metabolism
1-3_GL0011731	0	0	0	1	0	0	0	0	0	0	0	Bacteria	Firmicutes	Clostridia	Clostridiales				Oligopeptide transport ATP-binding protein AmiF	ABC transporter superfamily		[E] Amino acid transport and metabolism		K10823
1-3_GL0015177	1	0	0	1	0	0	0	0	0	0	0	Bacteria	Firmicutes	Clostridia	Clostridiales		Flavonifractor		Tellurium resistance protein TerZ	CAPAB/TerDEXZ family
13_GL0016350	1	1	1	0	1	0	1	0	0	1	1	Bacteria							30S ribosomal protein S5	Universal ribosomal protein uS5 family	Ribosomal protein S5, bacterial-type	[J] Translation, ribosomal structure and biogenesis		K02988
13_GL0016888	5	5	5	4	6	6	5	4	5	4	6	Bacteria	Bacteroidetes	Bacteroidia	Bacteroidales				Enolase (EC 4.2.1.11) (2-phospho-D-glycerate hydro-lyase) (2-phosphoglycerate dehydratase)	Enolase family	Enolase	[G] Carbohydrate transport and metabolism	glycolysis	K01689	4.2.1.11
1-3_GL0018101	3	1	0	1	0	1	0	0	0	1	1	Bacteria										[Q] Secondary metabolites biosynthesis, transport and catabolism
1-3_GL0024057	0	0	0	0	0	0	0	0	0	0	1	Bacteria	Firmicutes	Clostridia	Clostridiales							[G] Carbohydrate transport and metabolism
1-3_GL0030842	0	0	0	1	0	3	2	0	0	0	0	Bacteria	Bacteroidetes	Bacteroidia	Bacteroidales				Transcriptional regulatory protein RprY			[T] Signal transduction mechanisms
13_GL0031841	0	0	0	0	0	0	0	1	0	0	0	Bacteria	Firmicutes						Stress response protein SCP2	CAPAB/TerDEXZ family		[T] Signal transduction mechanisms
1-3_GL0039535	0	0	0	0	0	0	0	0	0	1	0	Bacteria	Firmicutes	Clostridia	Clostridiales	Lachnospiraceae	Lachnoclostridium		Flagellin (Fragment)	Bacterial flagellin family	Flagellin
13_GL0039924	0	2	1	1	0	1	1	1	2	2	2	Bacteria	Firmicutes	Clostridia	Clostridiales	Peptostreptococcaceae	Romboutsia	Romboutsia ilealis
1-3_GL0040107	1	0	0	0	0	0	0	0	0	0	0	Bacteria	Firmicutes						Reverse rubrerythrin-1 (revRbr 1) (NADH peroxidase) (NPXase) (Npx) (EC 1.11.1.1) (Rubperoxin 1) (Rpr 1)			[C] Energy production and conversion			1.11.1.1
1-3_GL0043484	0	0	0	0	0	1	1	0	0	0	0	Bacteria	Firmicutes	Clostridia	Clostridiales	Lachnospiraceae					Flagellin	[N] Cell motility
13_GL0043974	0	0	1	0	0	0	0	0	0	0	0	Bacteria	Firmicutes	Clostridia	Clostridiales	Peptostreptococcaceae	Romboutsia	Romboutsia ilealis	Glycogen phosphorylase (EC 2.4.1.1)	Glycogen phosphorylase family	Glycogen/starch/alpha-glucan phosphorylase			K00688	2.4.1.1
13_GL0044108	1	2	1	3	2	3	1	1	1	1	1	Bacteria	Bacteroidetes	Bacteroidia	Bacteroidales	Prevotellaceae	Prevotella		30S ribosomal protein S7	Universal ribosomal protein uS7 family	Ribosomal protein S7, bacterial/organellar-type	[J] Translation, ribosomal structure and biogenesis		K02992
13_GL0044109	0	0	0	1	0	0	0	0	0	0	0	Bacteria	Bacteroidetes	Bacteroidia	Bacteroidales	Bacteroidaceae	Bacteroides		Elongation factor G (EF-G)	TRAFAC class translation factor GTPase superfamily, Classic translation factor GTPase family, EF-G/EF-2 subfamily	Translation elongation factor EFG/EF2	[J] Translation, ribosomal structure and biogenesis		K02355
13_GL0044142	0	0	1	0	1	0	0	0	0	0	0	Bacteria	Firmicutes	Clostridia	Clostridiales	Peptostreptococcaceae	Romboutsia	Romboutsia ilealis	Chitinase B (EC 3.2.1.14)	Glycosyl hydrolase 18 family, Chitinase class II subfamily	Peroxiredoxin, TDXH subfamily				3.2.1.14
1-3_GL0044465	1	0	1	0	1	0	0	0	1	0	0	Bacteria	Firmicutes	Clostridia	Clostridiales				Phosphate acetyltransferase (EC 2.3.1.8) (Phosphotransacetylase)	Phosphate acetyltransferase and butyryltransferase family		[C] Energy production and conversion	acetyl-CoA biosynthesis	K00625	2.3.1.8
13_GL0047189	0	0	4	1	2	1	1	0	2	0	0	Bacteria	Firmicutes	Clostridia	Clostridiales	Peptostreptococcaceae	Romboutsia	Romboutsia ilealis			Bifunctional protein PutA	[M] Cell wall/membrane/envelope biogenesis
1-3_GL0047649	1	0	0	0	0	0	0	0	0	0	0	Bacteria	Firmicutes						Trifunctional nucleotide phosphoesterase protein YfkN [Includes: 2',3'-cyclic-nucleotide 2'-phosphodiesterase/3'-nucleotidase (EC 3.1.3.6) (EC 3.1.4.16); 5'-nucleotidase (EC 3.1.3.5)]	5'-nucleotidase family				K08693	3.1.3.6
1-3_GL0048005	0	0	0	0	1	1	3	1	0	0	0	Bacteria	Bacteroidetes	Bacteroidia	Bacteroidales	Prevotellaceae	Prevotella		TonB-dependent receptor SusC (Starch-utilization system protein C)	TonB-dependent receptor family			starch degradation	K21573
1-3_GL0048486	1	0	0	0	0	0	0	0	0	0	0	Bacteria	Firmicutes	Clostridia	Clostridiales	Lachnospiraceae	Roseburia		60 kDa chaperonin (GroEL protein) (Protein Cpn60)	Chaperonin (HSP60) family		[O] Posttranslational modification, protein turnover, chaperones		K04077
1-3_GL0048866	12	13	5	12	8	5	6	10	3	10	14	Bacteria	Firmicutes	Clostridia	Clostridiales	Lachnospiraceae		Lachnospiraceae bacterium	Glyceraldehyde-3-phosphate dehydrogenase (GAPDH) (EC 1.2.1.12) (CP 17/CP 18) (NAD-dependent glyceraldehyde-3-phosphate dehydrogenase)	Glyceraldehyde-3-phosphate dehydrogenase family	Glyceraldehyde/Erythrose phosphate dehydrogenase family	[G] Carbohydrate transport and metabolism	glycolysis		1.2.1.12
13_GL0052738	0	0	0	1	0	0	1	0	0	0	0	Bacteria	Firmicutes	Clostridia	Clostridiales	Peptostreptococcaceae			UDP-N-acetylglucosamine 1-carboxyvinyltransferase 1 (EC 2.5.1.7) (Enoylpyruvate transferase 1) (UDP-N-acetylglucosamine enolpyruvyl transferase 1) (EPT 1)	EPSP synthase family, MurA subfamily	UDP-N-acetylglucosamine 1-carboxyvinyltransferase	[M] Cell wall/membrane/envelope biogenesis	peptidoglycan biosynthesis	K00790	2.5.1.7
13_GL0054975	0	0	1	0	2	2	1	1	1	0	0	Bacteria										[U] Intracellular trafficking, secretion, and vesicular transport
1-3_GL0056070	0	0	0	1	0	0	0	0	0	0	0	Bacteria	Firmicutes						50S ribosomal protein L14	Universal ribosomal protein uL14 family	Ribosomal protein L14, bacterial-type	[J] Translation, ribosomal structure and biogenesis		K02874
13_GL0057971	0	0	0	0	0	1	0	0	0	1	0	Bacteria	Proteobacteria						60 kDa chaperonin (GroEL protein) (Protein Cpn60)	Chaperonin (HSP60) family		[O] Posttranslational modification, protein turnover, chaperones		K04077
1-3_GL0064429	0	0	0	0	0	1	0	0	0	0	0	Bacteria	Bacteroidetes	Bacteroidia	Bacteroidales				Dipeptide and tripeptide permease C (Dipeptide/tripeptide:H(+) symporter DtpC)	PTR2/POT transporter (TC 2.A.17) family		[E] Amino acid transport and metabolism		K03305
1-3_GL0067262	0	0	0	0	0	0	0	0	0	0	1	Bacteria	Firmicutes	Clostridia	Clostridiales				Acetate kinase (EC 2.7.2.1) (Acetokinase)	Acetokinase family		[C] Energy production and conversion	acetyl-CoA biosynthesis	K00925	2.7.2.1
1-3_GL0067581	2	1	0	4	1	0	0	3	0	3	4	Bacteria	Firmicutes	Clostridia					3-keto-5-aminohexanoate cleavage enzyme (EC 2.3.1.247)	KCE family	3-keto-5-aminohexanoate cleavage enzyme		L-lysine degradation via acetate pathway	K18013	2.3.1.247
1-3_GL0068792	0	1	0	0	0	0	0	0	0	1	1	Bacteria	Firmicutes	Clostridia	Clostridiales				Formate acetyltransferase (EC 2.3.1.54) (Pyruvate formate-lyase)		Formate acetyltransferase	[C] Energy production and conversion	pyruvate fermentation	K00656	2.3.1.54
1-3_GL0069431	2	2	1	2	1	2	3	2	1	2	2	Bacteria	Firmicutes						Flagellin	Bacterial flagellin family				K02406
1-3_GL0079162	2	2	0	1	1	0	0	1	0	2	1	Bacteria	Firmicutes						50S ribosomal protein L23	Universal ribosomal protein uL23 family		[J] Translation, ribosomal structure and biogenesis		K02892
1-3_GL0084429	0	0	0	0	0	2	2	0	0	0	0	Bacteria							Internalin-J
1-3_GL0088062	0	0	0	0	0	1	1	0	0	0	0	Bacteria	Bacteroidetes	Bacteroidia	Bacteroidales
1-3_GL0092198	0	0	0	0	1	1	0	0	0	0	0	Bacteria	Bacteroidetes	Bacteroidia	Bacteroidales	Porphyromonadaceae	Porphyromonas		30S ribosomal protein S7	Universal ribosomal protein uS7 family	Ribosomal protein S7, bacterial/organellar-type	[J] Translation, ribosomal structure and biogenesis		K02992
1-3_GL0105719	0	1	0	0	0	0	0	0	0	2	0	Bacteria	Firmicutes	Clostridia	Clostridiales				Flagellin	Bacterial flagellin family	Flagellin	[N] Cell motility		K02406
1-3_GL0107379	3	3	3	3	3	1	1	3	2	3	2	Bacteria	Firmicutes						Glyceraldehyde-3-phosphate dehydrogenase (GAPDH) (EC 1.2.1.12) (CP 17/CP 18) (NAD-dependent glyceraldehyde-3-phosphate dehydrogenase)	Glyceraldehyde-3-phosphate dehydrogenase family	Glyceraldehyde/Erythrose phosphate dehydrogenase family	[G] Carbohydrate transport and metabolism	glycolysis		1.2.1.12
1-4_GL0000992	0	0	0	1	0	0	0	0	0	0	0	Bacteria	Firmicutes						Methylaspartate ammonia-lyase (MAL) (EC 4.3.1.2) (3-methylaspartase ammonia-lyase) (Beta-methylaspartase)	Methylaspartate ammonia-lyase family	Methylaspartate ammonia-lyase	[E] Amino acid transport and metabolism	L-glutamate degradation via mesaconate pathway		4.3.1.2
14_GL0003867	0	0	2	0	2	1	0	0	2	0	0	Bacteria							NAD-dependent methanol dehydrogenase (MDH) (MEDH) (EC 1.1.1.244) (Type 3 alcohol dehydrogenase)	Iron-containing alcohol dehydrogenase family		[C] Energy production and conversion	methanol degradation	K00093	1.1.1.244
14_GL0005509	0	2	0	2	0	0	0	2	0	1	1	Bacteria	Firmicutes	Clostridia	Clostridiales				D-tagatose-1,6-bisphosphate aldolase subunit KbaZ	GatZ/KbaZ family, KbaZ subfamily	D-tagatose-bisphosphate aldolase, non-catalytic subunit GatZ/KbaZ	[G] Carbohydrate transport and metabolism	D-tagatose 6-phosphate degradation	K16371
1-4_GL0007179	1	2	0	1	1	1	1	1	0	1	2	Bacteria	Firmicutes	Clostridia	Clostridiales	Oscillospiraceae	Oscillibacter		3-aminobutyryl-CoA ammonia lyase (EC 4.3.1.14) (3-aminobutyryl-CoA deaminase)	KAL family			L-lysine degradation via acetate pathway	K18014	4.3.1.14
14_GL0007870	2	1	0	0	1	0	0	0	0	0	0	Bacteria	Firmicutes	Clostridia	Clostridiales		Pseudoflavonifractor		50S ribosomal protein L3	Universal ribosomal protein uL3 family	Ribosomal protein L3, bacterial/organelle-type	[J] Translation, ribosomal structure and biogenesis		K02906
14_GL0007917	0	0	1	0	0	0	0	0	0	0	0	Bacteria	Firmicutes	Clostridia								[P] Inorganic ion transport and metabolism
1-4_GL0010439	1	1	0	1	1	0	0	2	0	1	2	Bacteria	Firmicutes	Clostridia	Clostridiales				4-hydroxy-3-methylbut-2-enyl diphosphate reductase (HMBPP reductase) (EC 1.17.7.4)	IspH family	Ribosomal protein S1	[J] Translation, ribosomal structure and biogenesis	dimethylallyl diphosphate biosynthesis	K02945	1.17.7.4
14_GL0015245	1	1	2	1	3	2	1	1	1	1	1	Bacteria	Firmicutes	Erysipelotrichia	Erysipelotrichales	Erysipelotrichaceae			Small, acid-soluble spore protein C (SASP)	Alpha/beta-type SASP family	Small acid-soluble spore protein, alpha/beta-type
1-4_GL0015484	0	1	0	0	0	0	0	0	0	1	1	Bacteria	Firmicutes						Reverse rubrerythrin-1 (revRbr 1) (NADH peroxidase) (NPXase) (Npx) (EC 1.11.1.1) (Rubperoxin 1) (Rpr 1)			[C] Energy production and conversion			1.11.1.1
14_GL0016880	0	1	0	1	1	1	1	1	0	1	1	Bacteria	Firmicutes	Clostridia	Clostridiales	Lachnospiraceae	Roseburia	Roseburia cecicola	Flagellin	Bacterial flagellin family	Flagellin	[N] Cell motility		K02406
14_GL0019301	1	1	1	1	1	0	0	0	0	1	1	Bacteria	Firmicutes	Clostridia	Clostridiales				Flagellin	Bacterial flagellin family	Flagellin	[N] Cell motility		K02406
14_GL0020444	1	0	0	0	0	0	0	0	0	3	2	Bacteria	Firmicutes	Clostridia	Clostridiales				Fructose-bisphosphate aldolase (FBP aldolase) (FBPA) (EC 4.1.2.13) (Fructose-1,6-bisphosphate aldolase)	Class II fructose-bisphosphate aldolase family	Fructose-1,6-bisphosphate aldolase, class 2	[G] Carbohydrate transport and metabolism	glycolysis	K01624	4.1.2.13
1-4_GL0020774	3	0	0	0	0	0	0	0	0	0	0	Bacteria	Firmicutes	Clostridia	Clostridiales	Oscillospiraceae	Oscillibacter	Oscillibacter sp. ER4
1-4_GL0021054	0	1	0	0	0	0	0	0	0	0	1	Bacteria	Firmicutes						B-type flagellin	Bacterial flagellin family	Flagellin			K02406
1-4_GL0028897	1	1	0	1	0	0	0	0	0	0	1	Bacteria	Firmicutes						30S ribosomal protein S5	Universal ribosomal protein uS5 family	Ribosomal protein S5, bacterial-type	[J] Translation, ribosomal structure and biogenesis		K02988
14_GL0035231	0	0	0	0	0	0	0	1	0	0	0	Bacteria	Firmicutes	Clostridia	Clostridiales	Lachnospiraceae			Multiple sugar-binding protein	Bacterial solute-binding protein 1 family		[G] Carbohydrate transport and metabolism		K10117
1-4_GL0039015	0	0	0	1	0	0	0	0	0	1	1	Bacteria	Firmicutes	Clostridia	Clostridiales				Pyruvate-flavodoxin oxidoreductase (EC 1.2.7.-)	NifJ family	Pyruvate-flavodoxin oxidoreductase	[C] Energy production and conversion			1.2.7.-
14_GL0039320	0	0	2	0	1	1	2	0	2	0	0	Bacteria	Proteobacteria	Gammaproteobacteria	Xanthomonadales	Rhodanobacteraceae	Luteibacter		Elongation factor Tu (EF-Tu)	TRAFAC class translation factor GTPase superfamily, Classic translation factor GTPase family, EF-Tu/EF-1A subfamily	Translation elongation factor EFTu/EF1A, bacterial/organelle	[J] Translation, ribosomal structure and biogenesis		K02358
1-4_GL0041584	0	0	0	0	0	0	0	1	0	0	0	Bacteria	Firmicutes	Clostridia	Clostridiales	Ruminococcaceae	Ruminococcus
14_GL0042830	0	0	0	0	0	0	0	0	0	2	0	Bacteria	Bacteroidetes	Bacteroidia	Bacteroidales				Phosphoenolpyruvate carboxykinase (ATP) (PCK) (PEP carboxykinase) (PEPCK) (EC 4.1.1.49)	Phosphoenolpyruvate carboxykinase (ATP) family	Phosphoenolpyruvate carboxykinase, ATP-utilising	[C] Energy production and conversion	gluconeogenesis	K01610	4.1.1.49
14_GL0043536	0	1	0	0	0	1	0	0	0	10	6	Bacteria	Firmicutes	Clostridia	Clostridiales				Lactose-binding protein (LBP)	Bacterial solute-binding protein 1 family
14_GL0045535	0	2	0	1	0	0	0	0	0	2	1	Bacteria	Firmicutes									[G] Carbohydrate transport and metabolism
14_GL0046264	0	2	0	1	0	0	0	0	0	2	2	Bacteria	Firmicutes	Clostridia	Clostridiales	Lachnospiraceae	Roseburia		Acetyl-CoA acetyltransferase (EC 2.3.1.9) (Acetoacetyl-CoA thiolase)	Thiolase family		[I] Lipid transport and metabolism	(R)-mevalonate biosynthesis	K00626	2.3.1.9
14_GL0050195	0	1	0	1	0	0	0	0	0	1	0	Bacteria	Firmicutes						Chemical-damaging agent resistance protein C	CAPAB/TerDEXZ family		[T] Signal transduction mechanisms
14_GL0050288	1	0	0	0	0	0	0	0	0	0	2	Bacteria	Firmicutes	Clostridia	Clostridiales				Pyruvate-flavodoxin oxidoreductase (EC 1.2.7.-)	NifJ family	Pyruvate-flavodoxin oxidoreductase	[C] Energy production and conversion			1.2.7.-
14_GL0053187	0	0	0	0	0	0	0	0	0	1	1	Bacteria	Firmicutes	Clostridia	Clostridiales				Methionine--tRNA ligase (EC 6.1.1.10) (Methionyl-tRNA synthetase) (MetRS)	Class-I aminoacyl-tRNA synthetase family, MetG type 2A subfamily	Methionine-tRNA synthetase, type 2	[J] Translation, ribosomal structure and biogenesis		K01874	6.1.1.10
1-4_GL0055178	0	0	0	0	0	0	0	0	0	0	1	Bacteria	Firmicutes	Bacilli	Bacillales				Putative ABC transporter peptide-binding protein YtcQ	Bacterial solute-binding protein 1 family		[G] Carbohydrate transport and metabolism		K17318
14_GL0057001	1	0	0	0	0	0	0	0	0	0	0	Bacteria	Firmicutes						Uncharacterized protein TP_0007
14_GL0058083	0	3	1	0	1	1	1	0	1	0	0	Bacteria	Firmicutes	Bacilli	Bacillales	Bacillaceae	Bacillus		50S ribosomal protein L7/L12	Bacterial ribosomal protein bL12 family	Ribosomal protein L7/L12	[J] Translation, ribosomal structure and biogenesis		K02935
1-4_GL0059754	1	1	0	1	0	0	1	0	0	1	0	Bacteria	Firmicutes	Clostridia	Clostridiales		Epulopiscium		30S ribosomal protein S6	Bacterial ribosomal protein bS6 family	Ribosomal protein S6, plastid/chloroplast	[J] Translation, ribosomal structure and biogenesis		K02990
14_GL0060733	2	2	0	2	2	0	1	0	1	0	0	Bacteria	Firmicutes						30S ribosomal protein S8	Universal ribosomal protein uS8 family	Ribosomal protein S8	[J] Translation, ribosomal structure and biogenesis		K02994
1-4_GL0066114	2	2	0	3	1	2	1	2	0	2	4	Bacteria	Firmicutes	Clostridia	Clostridiales				Triosephosphate isomerase (TIM) (TPI) (EC 5.3.1.1) (Triose-phosphate isomerase)	Triosephosphate isomerase family	Triosephosphate isomerase, bacterial/eukaryotic	[G] Carbohydrate transport and metabolism	gluconeogenesis	K01803	5.3.1.1
1-4_GL0067439	1	0	0	0	0	0	0	0	0	0	2	Bacteria	Firmicutes	Clostridia	Clostridiales	Ruminococcaceae	Angelakisella	Angelakisella massiliensis			Inosine-5'-monophosphate dehydrogenase	[P] Inorganic ion transport and metabolism
14_GL0069880	3	3	0	4	0	1	1	4	1	5	1	Bacteria	Firmicutes	Clostridia	Clostridiales				Ketol-acid reductoisomerase (NADP(+)) (KARI) (EC 1.1.1.86) (Acetohydroxy-acid isomeroreductase) (AHIR) (Alpha-keto-beta-hydroxylacyl reductoisomerase) (Ketol-acid reductoisomerase type 1) (Ketol-acid reductoisomerase type I)	Ketol-acid reductoisomerase family		[E] Amino acid transport and metabolism	L-isoleucine biosynthesis	K00053	1.1.1.86
14_GL0071871	0	0	0	0	0	0	0	0	0	1	0	Bacteria	Firmicutes	Clostridia	Clostridiales				50S ribosomal protein L11	Universal ribosomal protein uL11 family	Ribosomal protein L11, bacterial-type	[J] Translation, ribosomal structure and biogenesis		K02867
14_GL0074561	1	0	0	0	0	0	0	0	1	0	0	Bacteria	Bacteroidetes	Bacteroidia					4-deoxy-L-threo-5-hexosulose-uronate ketol-isomerase (EC 5.3.1.17) (5-keto-4-deoxyuronate isomerase) (DKI isomerase)	KduI family		[G] Carbohydrate transport and metabolism	pectin degradation	K01815	5.3.1.17
14_GL0075950	0	0	0	0	2	0	0	0	0	0	0	Bacteria	Firmicutes	Clostridia	Clostridiales				NADH peroxidase (NPXase) (Npx) (EC 1.11.1.1)	Class-III pyridine nucleotide-disulfide oxidoreductase family		[P] Inorganic ion transport and metabolism		K05910	1.11.1.1
14_GL0075957	0	0	1	0	0	0	0	0	0	0	0	Bacteria	Firmicutes	Clostridia	Clostridiales				Small, acid-soluble spore protein beta (ASSP) (SASP)	Alpha/beta-type SASP family	Small acid-soluble spore protein, alpha/beta-type
14_GL0079032	0	0	0	0	0	0	0	0	0	0	1	Bacteria	Firmicutes	Clostridia	Clostridiales				Triosephosphate isomerase (TIM) (TPI) (EC 5.3.1.1) (Triose-phosphate isomerase)	Triosephosphate isomerase family	Triosephosphate isomerase, bacterial/eukaryotic	[G] Carbohydrate transport and metabolism	gluconeogenesis	K01803	5.3.1.1
14_GL0079197	0	0	0	0	1	0	0	0	0	0	0	Bacteria	Firmicutes	Clostridia	Clostridiales
1-4_GL0080002	2	0	0	0	0	0	0	0	0	1	0	Bacteria
14_GL0081395	1	2	2	0	3	3	2	1	3	0	0	Bacteria	Firmicutes	Clostridia	Clostridiales				Sulfite reductase, dissimilatory-type subunit alpha (Desulfoviridin subunit alpha) (Dissimilatory sulfite reductase subunit alpha) (dSiR alpha) (Hydrogensulfite reductase subunit alpha)		Sulphite reductase, dissimilatory-type alpha subunit	[C] Energy production and conversion		K11180
14_GL0081396	1	2	2	0	3	4	3	3	2	0	0	Bacteria	Firmicutes	Clostridia	Clostridiales				Sulfite reductase, dissimilatory-type subunit beta (EC 1.8.99.5) (Desulfoviridin subunit beta) (Dissimilatory sulfite reductase subunit beta) (dSiR beta) (Hydrogensulfite reductase subunit beta)		Sulphite reductase, dissimilatory-type beta subunit	[C] Energy production and conversion		K11181	1.8.99.5
14_GL0081399	0	4	3	3	3	3	4	0	3	1	0	Bacteria	Firmicutes	Clostridia	Clostridiales				Sulfite reductase, dissimilatory-type subunit gamma (EC 1.8.99.5) (Desulfoviridin subunit gamma) (Hydrogensulfite reductase subunit gamma)	DsrC/TusE family		[P] Inorganic ion transport and metabolism		K11179	1.8.99.5
1-4_GL0082702	0	0	0	0	0	1	0	1	0	1	1	Bacteria	Firmicutes					Firmicutes bacterium CAG:534
1-4_GL0087458	0	0	0	1	0	0	0	0	0	1	0	Bacteria	Firmicutes	Clostridia	Clostridiales	Lachnospiraceae	Blautia	Blautia hydrogenotrophica	Fructose-bisphosphate aldolase (FBP aldolase) (FBPA) (EC 4.1.2.13) (Fructose-1,6-bisphosphate aldolase)	Class II fructose-bisphosphate aldolase family	Fructose-1,6-bisphosphate aldolase, class 2	[G] Carbohydrate transport and metabolism	glycolysis	K01624	4.1.2.13
14_GL0088480	0	0	0	0	1	0	0	0	0	0	0	Bacteria	Firmicutes	Clostridia	Clostridiales							[C] Energy production and conversion
14_GL0089296	1	1	0	0	0	0	0	1	0	1	1	Bacteria	Bacteroidetes	Bacteroidia	Bacteroidales				Acetate kinase (EC 2.7.2.1) (Acetokinase)	Acetokinase family		[C] Energy production and conversion	acetyl-CoA biosynthesis	K00925	2.7.2.1
1-4_GL0090751	1	1	0	1	0	0	0	0	0	1	0	Bacteria							Ketol-acid reductoisomerase (NADP(+)) (KARI) (EC 1.1.1.86) (Acetohydroxy-acid isomeroreductase) (AHIR) (Alpha-keto-beta-hydroxylacyl reductoisomerase) (Ketol-acid reductoisomerase type 1) (Ketol-acid reductoisomerase type I)	Ketol-acid reductoisomerase family		[E] Amino acid transport and metabolism	L-isoleucine biosynthesis	K00053	1.1.1.86
1-4_GL0093240	0	0	0	1	0	0	0	0	0	0	2	Bacteria	Firmicutes	Clostridia	Clostridiales	Clostridiaceae	Butyricicoccus	Butyricicoccus pullicaecorum	Stress response protein SCP2	CAPAB/TerDEXZ family		[T] Signal transduction mechanisms
14_GL0098315	0	1	0	0	0	0	0	0	0	0	0	Bacteria	Bacteroidetes	Bacteroidia	Bacteroidales							[C] Energy production and conversion
14_GL0099767	0	0	0	0	1	0	1	1	0	0	0								Major cell-binding factor (CBF1) (PEB1)	Bacterial solute-binding protein 3 family		[E] Amino acid transport and metabolism		K10039
14_GL0102869	0	0	1	1	1	1	1	1	0	0	1	Bacteria	Firmicutes	Erysipelotrichia	Erysipelotrichales	Erysipelotrichaceae			Uncharacterized protein MT1533.2	Band 7/mec-2 family		[O] Posttranslational modification, protein turnover, chaperones
14_GL0104084	1	0	0	0	0	0	0	0	0	0	1	Bacteria	Firmicutes	Clostridia	Clostridiales	Oscillospiraceae	Oscillibacter	Oscillibacter sp. 1-3
14_GL0105035	0	1	2	1	1	0	0	0	0	0	2	Bacteria	Firmicutes	Clostridia	Clostridiales				Flagellin	Bacterial flagellin family	Flagellin	[N] Cell motility		K02406
14_GL0106233	0	0	0	0	0	1	0	0	0	0	0	Bacteria							NADP-reducing hydrogenase subunit HndA (EC 1.12.1.3) (Hydrogen dehydrogenase (NADP(+)))	Complex I 24 kDa subunit family	NADH-quinone oxidoreductase subunit E-like	[C] Energy production and conversion		K18330	1.12.1.3
14_GL0107223	1	1	1	0	1	1	1	1	0	0	0	Bacteria							Propanediol utilization protein PduA	Bacterial microcompartments protein family	Adenosylcobalamin biosynthesis, ATP:cob(I)alamin adenosyltransferase, EutT-type	[E] Amino acid transport and metabolism
14_GL0107224	0	0	3	0	4	4	3	0	3	0	0	Bacteria							Aldehyde-alcohol dehydrogenase [Includes: Alcohol dehydrogenase (ADH) (EC 1.1.1.1); Acetaldehyde dehydrogenase [acetylating] (ACDH) (EC 1.2.1.10); Pyruvate-formate-lyase deactivase (PFL deactivase)]	Aldehyde dehydrogenase family				K04072	1.1.1.1
14_GL0107819	0	0	0	0	0	1	0	0	0	0	0	Bacteria	Firmicutes	Clostridia					Putative aminotransferase YugH (EC 2.6.1.-)	Class-I pyridoxal-phosphate-dependent aminotransferase family		[E] Amino acid transport and metabolism		K10907	2.6.1.-
14_GL0110008	0	2	0	0	0	0	0	0	0	0	0	Bacteria	Firmicutes	Clostridia	Clostridiales				Elongation factor Tu (EF-Tu)	TRAFAC class translation factor GTPase superfamily, Classic translation factor GTPase family, EF-Tu/EF-1A subfamily	Translation elongation factor EFTu/EF1A, bacterial/organelle	[J] Translation, ribosomal structure and biogenesis		K02358
14_GL0110125	0	0	0	0	0	0	0	0	0	0	1	Bacteria	Firmicutes	Clostridia	Clostridiales	Lachnospiraceae						[C] Energy production and conversion
14_GL0110126	1	0	0	0	0	0	0	0	0	0	0	Bacteria	Firmicutes	Clostridia	Clostridiales
14_GL0112292	0	0	0	0	0	0	0	0	1	0	0	Bacteria	Firmicutes	Clostridia	Clostridiales						Glycoside hydrolase family 31	[G] Carbohydrate transport and metabolism
14_GL0113428	0	0	0	0	0	0	0	0	0	0	1	Bacteria	Firmicutes	Clostridia	Clostridiales				Uncharacterized protein Mb1524	Band 7/mec-2 family		[O] Posttranslational modification, protein turnover, chaperones
14_GL0118161	0	0	0	0	0	0	1	0	0	0	0								Nucleoside diphosphate kinase (NDK) (NDP kinase) (EC 2.7.4.6) (Nucleoside-2-P kinase)	NDK family	Nucleoside diphosphate kinase	[F] Nucleotide transport and metabolism		K00940	2.7.4.6
14_GL0122778	1	2	1	3	1	1	1	1	1	3	4	Bacteria	Firmicutes	Clostridia	Clostridiales				Fructose-bisphosphate aldolase (FBP aldolase) (FBPA) (EC 4.1.2.13) (Fructose-1,6-bisphosphate aldolase)	Class II fructose-bisphosphate aldolase family	Fructose-1,6-bisphosphate aldolase, class 2	[G] Carbohydrate transport and metabolism	glycolysis	K01624	4.1.2.13
14_GL0125793	0	1	0	0	0	0	0	0	0	1	1	Bacteria	Firmicutes	Clostridia	Clostridiales	Peptostreptococcaceae	Tepidibacter	Tepidibacter formicigenes	Fructose-bisphosphate aldolase (FBP aldolase) (FBPA) (EC 4.1.2.13) (Fructose-1,6-bisphosphate aldolase)	Class II fructose-bisphosphate aldolase family	Fructose-1,6-bisphosphate aldolase, class 2	[G] Carbohydrate transport and metabolism	glycolysis	K01624	4.1.2.13
14_GL0126374	1	0	0	0	1	0	0	0	0	1	0	Bacteria	Firmicutes	Clostridia	Clostridiales				Phosphoglycerate kinase (EC 2.7.2.3)	Phosphoglycerate kinase family	Phosphoglycerate kinase	[G] Carbohydrate transport and metabolism	glycolysis	K00927	2.7.2.3
14_GL0126569	2	1	0	1	1	1	1	2	0	2	2	Bacteria	Firmicutes						30S ribosomal protein S4	Universal ribosomal protein uS4 family	Ribosomal protein S4/S9	[J] Translation, ribosomal structure and biogenesis		K02986
14_GL0127645	0	0	0	0	0	0	0	0	0	1	0	Bacteria	Firmicutes	Clostridia	Clostridiales	Clostridiaceae	Clostridium		Corrinoid/iron-sulfur protein small subunit (C/Fe-SP small subunit) (CFeSP small subunit)			[C] Energy production and conversion
14_GL0130644	0	0	0	0	1	0	0	0	0	0	0	Bacteria	Firmicutes						N-substituted formamide deformylase (EC 3.5.1.91)	Metallo-dependent hydrolases superfamily				K07047	3.5.1.91
14_GL0132316	0	0	0	0	1	0	0	0	0	0	0	Bacteria	Firmicutes	Clostridia	Clostridiales
14_GL0132400	0	0	0	0	0	0	0	0	0	0	1	Bacteria	Firmicutes	Clostridia	Clostridiales		Pseudoflavonifractor				Sodium:dicarboxylate symporter
14_GL0136995	1	0	0	0	0	0	0	0	0	0	0	Bacteria	Firmicutes	Clostridia	Clostridiales				Uncharacterized ABC transporter ATP-binding protein TM_0352	ABC transporter superfamily		[V] Defense mechanisms		K02003
14_GL0138078	0	0	0	1	0	0	0	0	0	0	0	Bacteria	Firmicutes	Clostridia	Clostridiales				30S ribosomal protein S9	Universal ribosomal protein uS9 family	Ribosomal protein S9, bacterial/plastid	[J] Translation, ribosomal structure and biogenesis		K02996
14_GL0138079	0	1	0	0	0	0	0	0	0	0	0	Bacteria	Firmicutes	Clostridia	Clostridiales				50S ribosomal protein L13	Universal ribosomal protein uL13 family	Ribosomal protein L13, bacterial-type	[J] Translation, ribosomal structure and biogenesis		K02871
15:000000000-AVD4R:1:1101:11866:20862_1_226_+	0	0	0	0	0	0	0	1	0	1	1	Bacteria	Firmicutes	Clostridia	Clostridiales							[G] Carbohydrate transport and metabolism
15:000000000-AVD4R:1:1101:12913:12533_206_304_-	0	0	0	0	0	0	0	0	1	0	0	Bacteria	Bacteroidetes	Bacteroidia
15:000000000-AVD4R:1:1101:13018:22180_1_325_-	0	1	0	1	1	0	1	1	0	1	1	Bacteria	Bacteroidetes	Bacteroidia	Bacteroidales				Pyruvate, phosphate dikinase (EC 2.7.9.1) (Pyruvate, orthophosphate dikinase)	PEP-utilizing enzyme family	Pyruvate, phosphate dikinase	[G] Carbohydrate transport and metabolism			2.7.9.1
15:000000000-AVD4R:1:1101:13497:4277_1_241_-	0	1	1	0	0	0	0	0	2	0	1	Bacteria	Bacteroidetes	Bacteroidia					Pyruvate, phosphate dikinase (EC 2.7.9.1) (Pyruvate, orthophosphate dikinase)	PEP-utilizing enzyme family	Pyruvate, phosphate dikinase	[G] Carbohydrate transport and metabolism		K01006	2.7.9.1
15:000000000-AVD4R:1:1101:13777:21910_75_356_-	0	0	0	0	0	0	0	0	0	1	0	Bacteria	Bacteroidetes	Bacteroidia	Bacteroidales				Cytosol non-specific dipeptidase (EC 3.4.13.18) (Aminoacyl-histidine dipeptidase) (Beta-alanyl-histidine dipeptidase) (Carnosinase) (Cysteinylglycinase) (Peptidase D) (Xaa-His dipeptidase) (X-His dipeptidase)	Peptidase M20C family		[E] Amino acid transport and metabolism		K01270	3.4.13.18
15:000000000-AVD4R:1:1101:14091:21308_129_298_-	0	0	0	0	0	0	0	0	1	0	0	Bacteria	Bacteroidetes	Bacteroidia	Bacteroidales	Prevotellaceae			DNA-binding protein HU-beta (HU-1) (NS1)	Bacterial histone-like protein family		[L] Replication, recombination and repair
15:000000000-AVD4R:1:1101:14633:2003_1_333_+	0	0	0	1	1	0	0	0	0	0	0	Bacteria	Bacteroidetes	Bacteroidia	Bacteroidales			Bacteroidales bacterium 52_46				[U] Intracellular trafficking, secretion, and vesicular transport
15:000000000-AVD4R:1:1101:15163:5810_39_247_-	0	0	0	0	1	0	1	0	0	0	0	Bacteria	Firmicutes	Bacilli	Lactobacillales	Lactobacillaceae	Lactobacillus	Lactobacillus murinus	Urease subunit alpha (EC 3.5.1.5) (Urea amidohydrolase subunit alpha)	Metallo-dependent hydrolases superfamily, Urease alpha subunit family	Urease, alpha subunit	[E] Amino acid transport and metabolism	urea degradation	K01428	3.5.1.5
15:000000000-AVD4R:1:1101:15992:19715_1_361_+	0	1	1	1	1	0	1	0	1	0	0	Bacteria	Firmicutes						4-hydroxy-tetrahydrodipicolinate reductase (HTPA reductase) (EC 1.17.1.8)	DapB family	Dihydrodipicolinate reductase		L-lysine biosynthesis via DAP pathway	K00215	1.17.1.8
15:000000000-AVD4R:1:1101:17030:10154_1_251_-	0	2	0	0	1	0	0	0	3	1	0	Bacteria										[U] Intracellular trafficking, secretion, and vesicular transport
15:000000000-AVD4R:1:1101:17230:20528_1_346_+	1	0	1	0	1	1	1	0	1	1	1
15:000000000-AVD4R:1:1101:17507:6965_1_216_-	0	0	0	0	0	0	0	0	4	0	0
15:000000000-AVD4R:1:1101:17518:21152_1_211_+	1	4	0	1	0	2	1	2	0	5	7	Bacteria	Firmicutes	Clostridia	Clostridiales	Lachnospiraceae		Lachnospiraceae bacterium 28-4				[G] Carbohydrate transport and metabolism
15:000000000-AVD4R:1:1101:17817:18830_1_277_+	0	0	0	0	1	3	2	1	0	0	0										Glycoside hydrolase, family 13	[G] Carbohydrate transport and metabolism
15:000000000-AVD4R:1:1101:19292:10038_1_205_-	0	0	0	0	0	1	1	0	0	0	0	Bacteria	Bacteroidetes	Bacteroidia	Bacteroidales				Rubrerythrin-1 (Rr 1) (NADH peroxidase) (NPXase) (Npx) (EC 1.11.1.1)			[C] Energy production and conversion			1.11.1.1
15:000000000-AVD4R:1:1101:20121:13685_1_349_-	0	0	0	0	0	0	0	0	0	1	1	Bacteria	Bacteroidetes
15:000000000-AVD4R:1:1101:20411:7950_1_308_-	0	0	0	0	0	0	0	1	0	0	0
15:000000000-AVD4R:1:1101:21360:7939_1_210_-	0	0	0	0	0	0	0	0	0	0	2	Bacteria	Firmicutes	Clostridia	Clostridiales
15:000000000-AVD4R:1:1101:21676:5155_1_316_-	0	0	0	1	0	0	0	0	0	0	0	Bacteria	Bacteroidetes	Bacteroidia	Bacteroidales	Prevotellaceae	Prevotella		Elongation factor Tu (EF-Tu)	TRAFAC class translation factor GTPase superfamily, Classic translation factor GTPase family, EF-Tu/EF-1A subfamily	Translation elongation factor EFTu/EF1A, bacterial/organelle	[J] Translation, ribosomal structure and biogenesis		K02358
15:000000000-AVD4R:1:1101:21681:10168_1_243_+	0	0	0	0	0	0	0	0	0	1	0	Bacteria	Bacteroidetes	Bacteroidia	Bacteroidales				Superoxide dismutase [Fe] (EC 1.15.1.1)	Iron/manganese superoxide dismutase family	Manganese/iron superoxide dismutase	[P] Inorganic ion transport and metabolism		K04564	1.15.1.1
15:000000000-AVD4R:1:1101:21803:20562_1_289_-	0	0	0	0	0	0	1	1	0	1	0	Bacteria	Bacteroidetes	Bacteroidia	Bacteroidales	Prevotellaceae	Prevotella
15:000000000-AVD4R:1:1101:22421:21050_11_247_-	1	1	0	0	0	0	0	1	0	0	0	Bacteria	Actinobacteria <phylum>	Actinobacteria	Bifidobacteriales	Bifidobacteriaceae	Bifidobacterium				Phage capsid
15:000000000-AVD4R:1:1101:23309:10426_1_244_+	0	0	0	0	0	0	0	0	1	0	0	Bacteria	Bacteroidetes	Bacteroidia	Bacteroidales							[M] Cell wall/membrane/envelope biogenesis
15:000000000-AVD4R:1:1101:24903:12255_1_235_-	0	0	0	1	0	0	0	0	0	0	0										Peptidase C1A	[O] Posttranslational modification, protein turnover, chaperones
15:000000000-AVD4R:1:1101:25234:15495_1_249_+	1	0	0	1	1	0	0	0	0	1	0
15:000000000-AVD4R:1:1101:25401:8866_139_328_-	0	1	0	0	1	0	0	0	0	1	0	Bacteria	Bacteroidetes	Bacteroidia	Bacteroidales				Enolase (EC 4.2.1.11) (2-phospho-D-glycerate hydro-lyase) (2-phosphoglycerate dehydratase)	Enolase family	Enolase	[G] Carbohydrate transport and metabolism	glycolysis	K01689	4.2.1.11
15:000000000-AVD4R:1:1101:25465:6033_1_215_+	1	0	1	0	0	1	1	0	0	1	0	Bacteria	Bacteroidetes	Bacteroidia	Bacteroidales				Outer membrane protein A	OmpA family		[M] Cell wall/membrane/envelope biogenesis
15:000000000-AVD4R:1:1101:26328:18068_5_208_-	0	0	0	0	0	0	0	1	0	0	0	Bacteria	Firmicutes
15:000000000-AVD4R:1:1101:26840:17404_1_285_-	0	0	3	3	0	0	0	0	0	0	0
15:000000000-AVD4R:1:1101:27193:6873_1_342_-	0	0	0	1	0	0	0	0	0	0	0	Bacteria	Bacteroidetes	Bacteroidia	Bacteroidales	Prevotellaceae
15:000000000-AVD4R:1:1101:27933:17946_1_290_-	0	0	0	0	0	0	0	0	3	0	0	Bacteria	Bacteroidetes	Bacteroidia	Bacteroidales				50S ribosomal protein L21	Bacterial ribosomal protein bL21 family	Ribosomal protein L21-like	[J] Translation, ribosomal structure and biogenesis		K02888
15:000000000-AVD4R:1:1101:28924:11068_1_227_-	0	0	0	0	0	0	0	0	2	0	0	Bacteria	Bacteroidetes	Bacteroidia	Bacteroidales	Bacteroidaceae	Bacteroides
15:000000000-AVD4R:1:1101:4374:11967_1_288_+	0	1	1	1	0	1	1	0	2	1	0
15:000000000-AVD4R:1:1101:4806:19375_1_363_-	0	0	0	0	1	1	1	1	0	0	0	Bacteria	Bacteroidetes	Bacteroidia	Bacteroidales			Bacteroidales bacterium 43_36
15:000000000-AVD4R:1:1101:4868:15463_1_283_-	1	0	0	0	0	0	0	0	0	1	0	Bacteria	Firmicutes	Clostridia	Clostridiales	Clostridiaceae	Clostridium		NAD-dependent dihydropyrimidine dehydrogenase subunit PreA (DPD) (EC 1.3.1.1) (Dihydrothymine dehydrogenase) (Dihydrouracil dehydrogenase)	Dihydropyrimidine dehydrogenase family		[C] Energy production and conversion		K17723	1.3.1.1
15:000000000-AVD4R:1:1101:5185:9533_1_303_-	0	0	1	0	0	0	0	0	0	0	1	Bacteria	Bacteroidetes	Bacteroidia	Bacteroidales						Formyl-CoA:oxalate CoA-transferase	[C] Energy production and conversion
15:000000000-AVD4R:1:1101:7227:4931_1_263_+	0	0	0	0	0	1	1	0	0	0	0	Bacteria	Bacteroidetes	Bacteroidia	Bacteroidales	Bacteroidaceae	Bacteroides	Bacteroides sp. CAG:927	Putative glucosamine-6-phosphate deaminase-like protein BT_0258	Glucosamine/galactosamine-6-phosphate isomerase family, NagB subfamily	Glucosamine-6-phosphate isomerase	[G] Carbohydrate transport and metabolism		K02564
15:000000000-AVD4R:1:1101:7287:12032_1_224_-	1	0	0	0	0	0	0	0	0	4	3	Bacteria	Firmicutes	Clostridia	Clostridiales						Glycoside hydrolase, family 2	[G] Carbohydrate transport and metabolism
15:000000000-AVD4R:1:1101:7532:4913_1_252_-	0	0	0	0	0	0	0	0	1	0	0
15:000000000-AVD4R:1:1101:7663:9432_1_284_-	0	0	0	0	0	0	0	0	0	0	1	Bacteria	Firmicutes	Clostridia	Clostridiales				Acryloyl-CoA reductase electron transfer subunit beta (Electron transfer flavoprotein large subunit) (ETFLS) (Electron transfer flavoprotein subunit beta) (Beta-ETF)	ETF alpha-subunit/FixB family	Electron transfer flavoprotein, alpha subunit	[C] Energy production and conversion
15:000000000-AVD4R:1:1101:8004:2352_42_236_+	2	1	1	1	1	2	1	1	1	1	1	Bacteria	Firmicutes						DNA-directed RNA polymerase subunit alpha (RNAP subunit alpha) (EC 2.7.7.6) (RNA polymerase subunit alpha) (Transcriptase subunit alpha)	RNA polymerase alpha chain family	DNA-directed RNA polymerase, alpha subunit	[K] Transcription		K03040	2.7.7.6
15:000000000-AVD4R:1:1101:8058:19320_1_343_-	0	1	2	0	2	0	0	0	0	0	0	Bacteria	Bacteroidetes	Bacteroidia	Bacteroidales	Bacteroidaceae	Bacteroides
15:000000000-AVD4R:1:1101:8151:7357_1_251_-	1	0	0	0	1	0	0	0	0	0	0
15:000000000-AVD4R:1:1101:8857:13302_1_238_+	0	0	1	0	0	1	0	2	0	0	0	Bacteria	Firmicutes									[C] Energy production and conversion
15:000000000-AVD4R:1:1101:9453:14784_1_253_-	0	0	0	1	0	0	0	0	0	0	0	Bacteria	Bacteroidetes	Bacteroidia	Bacteroidales
15:000000000-AVD4R:1:1101:9457:6824_1_242_+	0	0	0	0	0	0	0	0	1	0	0	Bacteria	Bacteroidetes
15:000000000-AVD4R:1:1101:9727:21883_1_209_-	0	1	1	0	0	0	0	0	1	0	0	Bacteria	Bacteroidetes
15:000000000-AVD4R:1:1101:9755:5238_1_259_+	0	0	2	2	0	0	0	0	0	0	0
15:000000000-AVD4R:1:1102:12029:6377_1_161_+	0	0	0	0	0	0	0	0	0	1	0	Bacteria	Firmicutes						ATP synthase subunit beta (EC 3.6.3.14) (ATP synthase F1 sector subunit beta) (F-ATPase subunit beta)	ATPase alpha/beta chains family	ATPase, F1 complex, beta subunit	[C] Energy production and conversion		K02112	3.6.3.14
15:000000000-AVD4R:1:1102:13452:12819_1_273_+	4	2	0	3	0	0	1	3	0	3	1	Bacteria	Firmicutes	Clostridia	Clostridiales						Phosphoenolpyruvate carboxykinase, ATP-utilising	[C] Energy production and conversion
15:000000000-AVD4R:1:1102:13639:21015_1_294_+	1	0	0	0	0	0	0	0	0	0	1	Bacteria	Firmicutes	Clostridia	Clostridiales	Eubacteriaceae	Eubacterium	Eubacterium sp. CAG:115	Flagellin (Fragment)	Bacterial flagellin family	Flagellin
15:000000000-AVD4R:1:1102:14031:14143_1_260_+	0	0	1	0	0	0	0	0	0	1	0
15:000000000-AVD4R:1:1102:14231:12695_1_128_+	0	1	0	0	0	0	0	0	0	1	0	Bacteria	Firmicutes	Clostridia	Clostridiales				Flagellar motor switch protein FliN	FliN/MopA/SpaO family	Flagellar motor switch FliN			K02417
15:000000000-AVD4R:1:1102:14491:12922_168_334_-	0	0	2	0	0	0	0	0	0	1	1	Bacteria	Bacteroidetes	Bacteroidia	Bacteroidales				50S ribosomal protein L10	Universal ribosomal protein uL10 family		[J] Translation, ribosomal structure and biogenesis		K02864
15:000000000-AVD4R:1:1102:15226:22932_1_289_-	0	0	1	0	0	1	0	0	0	0	0	Bacteria	Bacteroidetes									[C] Energy production and conversion
15:000000000-AVD4R:1:1102:16048:9761_1_357_-	0	1	0	0	0	0	0	0	0	0	0	Bacteria	Bacteroidetes	Bacteroidia	Bacteroidales				Pyruvate-flavodoxin oxidoreductase (EC 1.2.7.-)	NifJ family	Pyruvate-flavodoxin oxidoreductase	[C] Energy production and conversion			1.2.7.-
15:000000000-AVD4R:1:1102:16900:12646_1_341_+	0	0	0	2	0	0	0	0	0	0	0	Bacteria	Firmicutes									[G] Carbohydrate transport and metabolism
15:000000000-AVD4R:1:1102:17172:4569_1_88_-	0	1	0	0	0	0	0	0	0	0	0	Bacteria	Bacteroidetes	Bacteroidia	Bacteroidales						Gram-negative bacterial TonB protein	[M] Cell wall/membrane/envelope biogenesis
15:000000000-AVD4R:1:1102:17271:22577_1_300_-	1	1	0	0	0	1	1	0	0	1	0	Bacteria	Bacteroidetes	Bacteroidia	Bacteroidales
15:000000000-AVD4R:1:1102:17525:21261_1_207_+	0	0	0	0	0	0	0	0	1	0	0	Bacteria	Bacteroidetes	Bacteroidia	Bacteroidales	Prevotellaceae	Alloprevotella	Alloprevotella tannerae	Phosphoglycerate kinase (EC 2.7.2.3)	Phosphoglycerate kinase family	Phosphoglycerate kinase	[G] Carbohydrate transport and metabolism	glycolysis	K00927	2.7.2.3
15:000000000-AVD4R:1:1102:18482:8779_1_219_-	0	0	0	1	0	0	1	1	0	0	0	Bacteria	Bacteroidetes	Bacteroidia	Bacteroidales
15:000000000-AVD4R:1:1102:18642:4510_1_205_-	0	0	1	0	0	0	0	0	0	0	0
15:000000000-AVD4R:1:1102:18748:9743_1_348_-	1	1	2	0	0	1	1	1	2	0	0	Bacteria	Bacteroidetes	Bacteroidia	Bacteroidales	Bacteroidaceae	Bacteroides
15:000000000-AVD4R:1:1102:19565:19168_1_257_-	1	1	0	0	0	0	0	0	0	1	1	Bacteria	Firmicutes	Clostridia	Clostridiales	Oscillospiraceae	Oscillibacter	Oscillibacter sp. 1-3			Chemotaxis methyl-accepting receptor
15:000000000-AVD4R:1:1102:19670:9438_1_227_+	0	1	0	0	0	0	0	0	0	0	0	Bacteria	Bacteroidetes	Bacteroidia	Bacteroidales	Prevotellaceae
15:000000000-AVD4R:1:1102:19806:23837_1_125_-	1	1	0	0	0	0	0	0	0	1	0	Bacteria	Firmicutes	Clostridia	Clostridiales						Translation elongation factor EFG/EF2	[J] Translation, ribosomal structure and biogenesis
15:000000000-AVD4R:1:1102:20645:2962_1_208_-	0	1	0	1	0	0	0	0	0	1	0	Bacteria	Firmicutes	Clostridia	Clostridiales	Clostridiaceae	Clostridium		Butyrate kinase 1 (BK 1) (BKI) (EC 2.7.2.7)	Acetokinase family	Butyrate kinase	[C] Energy production and conversion	butanoate metabolism	K00929	2.7.2.7
15:000000000-AVD4R:1:1102:20705:16982_1_209_-	3	0	0	0	2	0	0	0	0	0	0	Bacteria	Firmicutes						Flagellin	Bacterial flagellin family	Flagellin	[N] Cell motility		K02406
15:000000000-AVD4R:1:1102:20871:23511_1_218_+	0	0	0	0	0	0	0	1	0	0	0	Bacteria	Firmicutes	Clostridia	Clostridiales				Glyceraldehyde-3-phosphate dehydrogenase (GAPDH) (EC 1.2.1.12) (CP 17/CP 18) (NAD-dependent glyceraldehyde-3-phosphate dehydrogenase)	Glyceraldehyde-3-phosphate dehydrogenase family	Glyceraldehyde/Erythrose phosphate dehydrogenase family	[G] Carbohydrate transport and metabolism	glycolysis		1.2.1.12
15:000000000-AVD4R:1:1102:21140:15575_1_253_-	1	0	1	0	0	0	0	1	1	0	0
15:000000000-AVD4R:1:1102:21722:17834_1_301_-	0	0	0	0	0	0	0	0	1	0	0	Bacteria	Bacteroidetes	Bacteroidia	Bacteroidales				UDP-glucose 4-epimerase (EC 5.1.3.2) (Galactowaldenase) (UDP-galactose 4-epimerase)	NAD(P)-dependent epimerase/dehydratase family	UDP-glucose 4-epimerase GalE	[M] Cell wall/membrane/envelope biogenesis	galactose metabolism	K01784	5.1.3.2
15:000000000-AVD4R:1:1102:21733:17069_1_248_-	2	2	2	2	1	1	0	2	1	0	0	Bacteria	Firmicutes	Clostridia	Clostridiales	Eubacteriaceae	Eubacterium		Flagellin (Fragment)	Bacterial flagellin family	Flagellin	[N] Cell motility
15:000000000-AVD4R:1:1102:21996:13705_1_359_-	0	0	2	1	1	1	1	1	0	0	0	Bacteria	Bacteroidetes	Bacteroidia
15:000000000-AVD4R:1:1102:22600:19150_1_214_-	0	0	0	0	0	0	0	0	1	2	1	Bacteria	Bacteroidetes	Bacteroidia	Bacteroidales	Prevotellaceae	Alloprevotella	Alloprevotella rava	Pyruvate, phosphate dikinase (EC 2.7.9.1) (Pyruvate, orthophosphate dikinase)	PEP-utilizing enzyme family	Pyruvate, phosphate dikinase			K01006	2.7.9.1
15:000000000-AVD4R:1:1102:22769:17201_1_241_+	0	0	0	0	1	0	0	0	0	1	0	Bacteria	Firmicutes	Clostridia	Clostridiales	Eubacteriaceae	Eubacterium	Eubacterium sp. CAG:180
15:000000000-AVD4R:1:1102:23022:5170_1_252_+	0	0	0	0	0	0	0	0	1	0	0
15:000000000-AVD4R:1:1102:23085:22995_1_362_-	1	0	0	0	0	0	0	0	0	1	0	Bacteria							Protein AroA(G) [Includes: Phospho-2-dehydro-3-deoxyheptonate aldolase (EC 2.5.1.54) (3-deoxy-D-arabino-heptulosonate 7-phosphate synthase) (DAHP synthase) (Phospho-2-keto-3-deoxyheptonate aldolase); Chorismate mutase (EC 5.4.99.5)]	Class-I DAHP synthase family		[E] Amino acid transport and metabolism	chorismate biosynthesis	K13853	2.5.1.54
15:000000000-AVD4R:1:1102:23211:6375_1_330_-	1	0	0	0	0	0	0	0	0	1	1	Bacteria	Firmicutes	Clostridia					Acryloyl-CoA reductase electron transfer subunit beta (Electron transfer flavoprotein large subunit) (ETFLS) (Electron transfer flavoprotein subunit beta) (Beta-ETF)	ETF alpha-subunit/FixB family	Electron transfer flavoprotein, alpha subunit	[C] Energy production and conversion
15:000000000-AVD4R:1:1102:23906:20222_1_288_+	1	2	0	1	1	0	0	0	1	2	2	Bacteria	Proteobacteria	Deltaproteobacteria	Desulfovibrionales	Desulfovibrionaceae	Desulfovibrio		Outer membrane porin F (Root adhesin)	OmpA family		[M] Cell wall/membrane/envelope biogenesis
15:000000000-AVD4R:1:1102:24326:17175_1_362_+	0	0	0	0	0	1	1	1	0	0	0	Bacteria	Firmicutes						Aminomethyltransferase (EC 2.1.2.10) (Glycine cleavage system T protein)	GcvT family		[E] Amino acid transport and metabolism		K00605	2.1.2.10
15:000000000-AVD4R:1:1102:25837:18484_1_217_-	2	3	4	6	3	4	4	7	5	3	3	Bacteria	Firmicutes	Bacilli	Bacillales				Flagellar filament 31.3 kDa core protein (Flagellin subunit protein B2)	Bacterial flagellin family
15:000000000-AVD4R:1:1102:25872:14581_1_336_-	0	0	0	0	0	0	0	0	1	0	0	Bacteria	Bacteroidetes	Bacteroidia	Bacteroidales	Prevotellaceae	Paraprevotella
15:000000000-AVD4R:1:1102:26806:11369_1_242_+	0	1	0	1	1	1	1	0	1	0	0	Bacteria	Bacteroidetes	Bacteroidia	Bacteroidales	Prevotellaceae	Prevotella		50S ribosomal protein L17	Bacterial ribosomal protein bL17 family	Ribosomal protein L17			K02879
15:000000000-AVD4R:1:1102:27028:12757_1_345_-	0	1	0	0	2	0	0	0	0	1	0	Bacteria	Bacteroidetes	Bacteroidia	Bacteroidales	Prevotellaceae	Prevotella		Efflux pump periplasmic linker BepF	Membrane fusion protein (MFP) (TC 8.A.1) family		[V] Defense mechanisms		K03585
15:000000000-AVD4R:1:1102:27932:9611_1_365_-	2	2	2	2	0	1	1	0	2	2	1	Bacteria							Flagellin (Phase 1-C flagellin)	Bacterial flagellin family	Flagellin
15:000000000-AVD4R:1:1102:29411:11926_1_244_-	0	0	0	1	1	0	0	0	0	0	0	Bacteria	Bacteroidetes	Bacteroidia	Bacteroidales				Transcriptional regulatory protein RprY			[T] Signal transduction mechanisms
15:000000000-AVD4R:1:1102:29626:14152_1_330_+	0	0	0	0	0	0	0	0	0	0	1	Bacteria	Firmicutes	Clostridia	Clostridiales							[T] Signal transduction mechanisms
15:000000000-AVD4R:1:1102:4669:14204_1_238_+	0	2	0	0	0	2	0	1	0	0	0	Bacteria	Bacteroidetes	Bacteroidia	Bacteroidales	Prevotellaceae	Prevotella		Outer membrane protein SusE (Starch-utilization system protein E)	SusE family	Outer membrane protein SusF/SusE		starch degradation	K21571
15:000000000-AVD4R:1:1102:7706:19252_1_216_-	0	0	2	1	0	0	0	0	0	0	0
15:000000000-AVD4R:1:1102:8943:12579_1_353_-	2	2	1	0	0	0	0	0	1	0	0
15:000000000-AVD4R:1:1102:9087:7628_1_218_+	0	0	0	0	0	0	0	0	1	0	0	Bacteria	Bacteroidetes	Bacteroidia	Bacteroidales	Prevotellaceae	Prevotella	Prevotella sp. CAG:1031
15:000000000-AVD4R:1:1102:9297:16602_16_251_-	2	1	0	0	0	0	0	0	0	1	2	Bacteria	Bacteroidetes	Bacteroidia	Bacteroidales				Xylose isomerase (EC 5.3.1.5)	Xylose isomerase family	Xylose isomerase, bacterial-type	[G] Carbohydrate transport and metabolism		K01805	5.3.1.5
15:000000000-AVD4R:1:1102:9360:5097_1_230_+	0	0	0	0	0	1	1	0	0	0	0	Bacteria	Bacteroidetes	Bacteroidia	Bacteroidales
15:000000000-AVD4R:1:1102:9524:10459_1_237_+	0	2	4	3	2	3	3	1	0	0	0
15:000000000-AVD4R:1:1103:10017:4382_1_365_-	0	0	0	0	0	0	0	0	1	0	0	Bacteria	Bacteroidetes	Bacteroidia	Bacteroidales	Bacteroidaceae	Bacteroides				Ribosomal protein L11 methyltransferase	[V] Defense mechanisms
15:000000000-AVD4R:1:1103:10152:16233_51_267_-	0	0	0	0	0	0	0	1	0	0	0	Bacteria	Firmicutes	Clostridia	Clostridiales		Flavonifractor				Electron transfer flavoprotein, beta subunit	[C] Energy production and conversion
15:000000000-AVD4R:1:1103:10227:13609_1_241_-	0	0	0	0	0	0	0	0	2	0	0	Bacteria	Bacteroidetes	Bacteroidia	Bacteroidales	Prevotellaceae	Prevotella					[G] Carbohydrate transport and metabolism
15:000000000-AVD4R:1:1103:10310:5574_1_330_+	0	0	0	1	0	1	1	0	1	0	0	Eukaryota	Chordata	Mammalia	Rodentia	Muridae	Rattus	Rattus norvegicus			Annexin, type IV
15:000000000-AVD4R:1:1103:11303:13419_1_319_-	0	0	0	0	0	0	0	0	1	0	0	Bacteria	Bacteroidetes	Bacteroidia	Bacteroidales				Methylmalonyl-CoA mutase large subunit (EC 5.4.99.2) (MCM-alpha)	Methylmalonyl-CoA mutase family		[I] Lipid transport and metabolism	propanoyl-CoA degradation	K01847	5.4.99.2
15:000000000-AVD4R:1:1103:11891:16083_1_254_-	0	0	0	0	0	0	0	0	0	0	1
15:000000000-AVD4R:1:1103:11995:4224_1_191_-	0	0	0	0	0	0	0	0	0	1	1
15:000000000-AVD4R:1:1103:12128:8703_1_189_-	1	1	0	1	0	2	0	0	0	1	1	Bacteria	Bacteroidetes	Bacteroidia	Bacteroidales				ATP-dependent Clp protease proteolytic subunit (EC 3.4.21.92) (Endopeptidase Clp)	Peptidase S14 family	Clp protease proteolytic subunit /Translocation-enhancing protein TepA	[O] Posttranslational modification, protein turnover, chaperones		K01358	3.4.21.92
15:000000000-AVD4R:1:1103:12873:16707_202_329_-	0	0	0	0	0	0	0	0	1	0	0	Bacteria	Bacteroidetes	Bacteroidia	Bacteroidales
15:000000000-AVD4R:1:1103:12923:16541_1_354_+	0	0	0	0	0	0	0	0	0	1	0	Bacteria	Bacteroidetes	Bacteroidia	Bacteroidales				50S ribosomal protein L19	Bacterial ribosomal protein bL19 family	Ribosomal protein L19	[J] Translation, ribosomal structure and biogenesis		K02884
15:000000000-AVD4R:1:1103:13158:18664_1_326_+	0	0	1	0	0	0	0	0	0	0	0	Bacteria	Bacteroidetes	Bacteroidia	Bacteroidales				2,3-bisphosphoglycerate-independent phosphoglycerate mutase (BPG-independent PGAM) (Phosphoglyceromutase) (iPGM) (EC 5.4.2.12)	BPG-independent phosphoglycerate mutase family	Phosphoglycerate mutase, 2,3-bisphosphoglycerate-independent	[G] Carbohydrate transport and metabolism	glycolysis	K15633	5.4.2.12
15:000000000-AVD4R:1:1103:13439:24728_1_249_-	1	1	0	1	0	0	0	0	0	0	1	Bacteria	Firmicutes						Acyl-CoA dehydrogenase, short-chain specific (EC 1.3.8.1) (Butyryl-CoA dehydrogenase) (SCAD)	Acyl-CoA dehydrogenase family		[I] Lipid transport and metabolism	butanoate metabolism	K00248	1.3.8.1
15:000000000-AVD4R:1:1103:14212:22615_1_355_+	0	0	0	0	1	0	0	0	0	0	0
15:000000000-AVD4R:1:1103:15219:20843_1_328_-	0	0	2	2	0	1	1	1	2	1	0	Bacteria	Bacteroidetes	Bacteroidia	Bacteroidales				Phosphoserine aminotransferase (EC 2.6.1.52) (Phosphohydroxythreonine aminotransferase) (PSAT)	Class-V pyridoxal-phosphate-dependent aminotransferase family, SerC subfamily	Phosphoserine aminotransferase	[E] Amino acid transport and metabolism	L-serine biosynthesis	K00831	2.6.1.52
15:000000000-AVD4R:1:1103:15829:10263_1_346_-	1	1	0	1	1	0	1	0	0	0	0	Bacteria	Firmicutes	Clostridia	Clostridiales	Eubacteriaceae	Eubacterium	Eubacterium plexicaudatum
15:000000000-AVD4R:1:1103:16396:5217_1_232_-	0	0	2	0	0	0	0	0	0	0	0	Bacteria	Bacteroidetes	Bacteroidia	Bacteroidales				30S ribosomal protein S16	Bacterial ribosomal protein bS16 family	Ribosomal protein S16	[J] Translation, ribosomal structure and biogenesis		K02959
15:000000000-AVD4R:1:1103:16527:17394_1_321_-	0	0	0	1	0	0	0	0	0	0	0
15:000000000-AVD4R:1:1103:17127:19431_1_286_+	0	0	1	1	0	1	1	0	1	1	0	Bacteria	Bacteroidetes	Cytophagia	Cytophagales				50S ribosomal protein L24	Universal ribosomal protein uL24 family	Ribosomal protein L24	[J] Translation, ribosomal structure and biogenesis		K02895
15:000000000-AVD4R:1:1103:17136:16103_1_331_+	2	2	1	0	0	1	1	1	0	0	1	Bacteria	Bacteroidetes	Bacteroidia	Bacteroidales
15:000000000-AVD4R:1:1103:17442:20148_1_360_+	0	0	0	0	0	0	0	0	2	0	0	Bacteria	Bacteroidetes
15:000000000-AVD4R:1:1103:17928:24153_1_223_-	0	0	0	1	0	0	0	0	0	0	0
15:000000000-AVD4R:1:1103:19668:11345_1_261_-	1	0	0	0	0	0	0	0	0	0	0	Bacteria	Firmicutes									[G] Carbohydrate transport and metabolism
15:000000000-AVD4R:1:1103:19899:20619_1_206_-	0	0	0	0	0	0	0	1	0	0	0	Bacteria	Firmicutes						Elongation factor Tu (EF-Tu)	TRAFAC class translation factor GTPase superfamily, Classic translation factor GTPase family, EF-Tu/EF-1A subfamily	Translation elongation factor EFTu/EF1A, bacterial/organelle	[J] Translation, ribosomal structure and biogenesis		K02358
15:000000000-AVD4R:1:1103:19935:15402_1_297_+	1	0	0	0	0	0	0	0	0	0	2	Bacteria	Firmicutes	Clostridia	Clostridiales	Lachnospiraceae
15:000000000-AVD4R:1:1103:20142:14369_1_346_+	0	0	0	0	0	0	0	0	0	0	1	Bacteria	Firmicutes	Clostridia	Clostridiales						Leu/Ile/Val-binding protein	[E] Amino acid transport and metabolism
15:000000000-AVD4R:1:1103:21046:22732_1_216_+	1	0	0	0	0	0	0	0	0	0	0	Bacteria	Firmicutes						LL-diaminopimelate aminotransferase (DAP-AT) (DAP-aminotransferase) (LL-DAP-aminotransferase) (EC 2.6.1.83)	Class-I pyridoxal-phosphate-dependent aminotransferase family, LL-diaminopimelate aminotransferase subfamily	LL-diaminopimelate aminotransferase	[E] Amino acid transport and metabolism	L-lysine biosynthesis via DAP pathway	K10206	2.6.1.83
15:000000000-AVD4R:1:1103:21118:12173_229_303_-	0	0	0	0	0	0	0	0	1	0	0
15:000000000-AVD4R:1:1103:21149:16456_1_223_+	0	1	1	0	0	1	0	0	2	1	0	Bacteria							60 kDa chaperonin (GroEL protein) (Protein Cpn60)	Chaperonin (HSP60) family				K04077
15:000000000-AVD4R:1:1103:21223:23243_1_224_-	0	1	1	0	0	0	0	0	0	0	0	Bacteria	Bacteroidetes	Bacteroidia	Bacteroidales				50S ribosomal protein L23	Universal ribosomal protein uL23 family		[J] Translation, ribosomal structure and biogenesis		K02892
15:000000000-AVD4R:1:1103:21777:6764_1_261_+	0	0	1	0	0	0	0	0	0	0	0	Bacteria	Bacteroidetes	Bacteroidia	Bacteroidales	Tannerellaceae	Parabacteroides		NAD-specific glutamate dehydrogenase (NAD-GDH) (EC 1.4.1.2) (NADH-dependent glutamate dehydrogenase)	Glu/Leu/Phe/Val dehydrogenases family	Glutamate dehydrogenase	[E] Amino acid transport and metabolism		K00262	1.4.1.2
15:000000000-AVD4R:1:1103:21822:12545_1_330_+	0	0	0	0	0	0	0	1	0	0	0	Bacteria	Bacteroidetes						TonB-dependent receptor SusC (Starch-utilization system protein C)	TonB-dependent receptor family			starch degradation	K21573
15:000000000-AVD4R:1:1103:22214:14274_1_343_+	0	1	0	0	0	0	0	0	0	0	0	Bacteria	Bacteroidetes
15:000000000-AVD4R:1:1103:22491:9066_1_354_-	0	2	0	0	0	0	0	2	0	2	3	Bacteria	Firmicutes									[G] Carbohydrate transport and metabolism
15:000000000-AVD4R:1:1103:22493:22246_1_238_+	0	0	0	0	0	0	0	0	0	0	1	Bacteria	Firmicutes	Clostridia	Clostridiales
15:000000000-AVD4R:1:1103:22600:7046_1_214_+	1	1	0	0	1	0	1	1	0	1	1	Bacteria	Bacteroidetes	Bacteroidia	Bacteroidales	Prevotellaceae	Prevotella		Methylmalonyl-CoA mutase small subunit (EC 5.4.99.2) (MCM-beta)	Methylmalonyl-CoA mutase family	Methylmalonyl-CoA mutase, beta chain	[I] Lipid transport and metabolism	propanoyl-CoA degradation	K01847	5.4.99.2
15:000000000-AVD4R:1:1103:22626:17921_1_288_+	0	1	2	0	2	1	0	0	2	2	2	Eukaryota			Perkinsida	Perkinsidae	Perkinsus	Perkinsus marinus	Pyruvate-flavodoxin oxidoreductase (EC 1.2.7.-)	NifJ family	Pyruvate-flavodoxin oxidoreductase	[C] Energy production and conversion			1.2.7.-
15:000000000-AVD4R:1:1103:23921:2386_1_295_-	0	0	0	0	0	0	0	0	0	0	1	Bacteria	Firmicutes						Methyl-accepting chemotaxis protein 3					K03406
15:000000000-AVD4R:1:1103:24220:10589_1_214_+	0	1	0	1	0	0	0	0	0	0	0	Bacteria	Firmicutes	Clostridia	Clostridiales
15:000000000-AVD4R:1:1103:25470:16252_1_318_+	0	0	1	0	1	1	1	0	1	1	0	Bacteria	Bacteroidetes	Bacteroidia	Bacteroidales
15:000000000-AVD4R:1:1103:25640:20023_1_227_-	0	0	1	0	0	0	0	0	1	2	2	Bacteria	Bacteroidetes	Bacteroidia	Bacteroidales			Bacteroidales bacterium 52_46
15:000000000-AVD4R:1:1103:25716:7788_1_311_+	2	2	4	2	4	4	5	3	3	2	2	Bacteria	Bacteroidetes	Bacteroidia	Bacteroidales				60 kDa chaperonin (GroEL protein) (Protein Cpn60)	Chaperonin (HSP60) family		[O] Posttranslational modification, protein turnover, chaperones		K04077
15:000000000-AVD4R:1:1103:25778:14936_19_240_+	1	1	0	0	0	0	0	0	0	0	0	Bacteria	Firmicutes	Clostridia	Clostridiales				50S ribosomal protein L5	Universal ribosomal protein uL5 family	Ribosomal protein L5, bacterial-type	[J] Translation, ribosomal structure and biogenesis		K02931
15:000000000-AVD4R:1:1103:27041:19105_1_209_+	0	0	0	0	0	0	0	1	0	0	0	Bacteria	Firmicutes	Clostridia	Clostridiales							[G] Carbohydrate transport and metabolism
15:000000000-AVD4R:1:1103:28654:16605_1_311_+	2	4	0	1	0	0	0	0	0	1	1	Bacteria	Firmicutes
15:000000000-AVD4R:1:1103:5113:6282_1_352_+	2	2	0	0	0	0	0	0	0	0	0	Bacteria	Firmicutes	Clostridia	Clostridiales	Oscillospiraceae	Oscillibacter	Oscillibacter sp. 1-3
15:000000000-AVD4R:1:1103:6144:7545_1_268_+	0	0	0	0	1	1	1	1	1	0	0	Eukaryota	Chordata	Mammalia					Glyceraldehyde-3-phosphate dehydrogenase (GAPDH) (EC 1.2.1.12) (NAD-dependent glyceraldehyde-3-phosphate dehydrogenase)	Glyceraldehyde-3-phosphate dehydrogenase family	Glyceraldehyde/Erythrose phosphate dehydrogenase family	[G] Carbohydrate transport and metabolism	glycolysis	K00134	1.2.1.12
15:000000000-AVD4R:1:1103:6887:7106_1_249_+	0	2	0	0	1	0	0	0	0	0	0
15:000000000-AVD4R:1:1103:6939:15497_1_353_+	2	0	0	0	0	0	0	0	0	0	2	Bacteria	Firmicutes	Clostridia	Clostridiales							[G] Carbohydrate transport and metabolism
15:000000000-AVD4R:1:1103:7115:7398_1_329_+	0	0	1	0	0	0	0	0	1	0	0	Bacteria	Bacteroidetes	Bacteroidia	Bacteroidales				Outer membrane protein MIP (EC 5.2.1.8) (Macrophage infectivity potentiator) (Peptidyl-prolyl cis-trans isomerase) (PPIase) (Rotamase)	FKBP-type PPIase family	Peptidyl-prolyl cis-trans isomerase, FKBP-type	[O] Posttranslational modification, protein turnover, chaperones			5.2.1.8
15:000000000-AVD4R:1:1103:7569:11460_1_338_-	0	0	0	0	0	0	0	0	0	1	0	Bacteria	Bacteroidetes	Bacteroidia	Bacteroidales				Glyceraldehyde-3-phosphate dehydrogenase (GAPDH) (EC 1.2.1.12) (NAD-dependent glyceraldehyde-3-phosphate dehydrogenase)	Glyceraldehyde-3-phosphate dehydrogenase family	Glyceraldehyde/Erythrose phosphate dehydrogenase family	[G] Carbohydrate transport and metabolism	glycolysis	K00134	1.2.1.12
15:000000000-AVD4R:1:1103:8794:11372_18_242_+	2	0	0	0	0	0	0	0	0	0	0
15:000000000-AVD4R:1:1103:9325:16325_1_276_-	0	1	0	0	0	0	0	0	0	0	0	Bacteria	Firmicutes	Clostridia	Clostridiales	Clostridiaceae	Clostridium		Xylulose kinase (Xylulokinase) (EC 2.7.1.17)	FGGY kinase family	Xylulokinase	[G] Carbohydrate transport and metabolism			2.7.1.17
15:000000000-AVD4R:1:1103:9344:14099_1_313_-	0	0	0	0	0	0	0	0	1	0	0	Bacteria	Bacteroidetes	Bacteroidia	Bacteroidales	Prevotellaceae	Prevotella
15:000000000-AVD4R:1:1103:9506:18539_1_298_-	0	0	0	0	0	1	0	0	0	0	0	Bacteria	Bacteroidetes	Bacteroidia	Bacteroidales
15:000000000-AVD4R:1:1103:9529:14844_1_378_+	1	1	1	1	2	1	1	1	0	1	1	Bacteria	Bacteroidetes	Bacteroidia	Bacteroidales	Prevotellaceae	Prevotella	Prevotella sp. tf2-5
15:000000000-AVD4R:1:1103:9590:4321_1_240_+	0	0	0	1	0	0	0	0	0	0	0	Bacteria	Firmicutes	Clostridia	Clostridiales	Lachnospiraceae					Phosphoenolpyruvate carboxykinase, ATP-utilising	[C] Energy production and conversion
15:000000000-AVD4R:1:1104:10436:22502_1_242_-	2	1	0	1	0	0	0	2	0	2	1
15:000000000-AVD4R:1:1104:10469:6786_1_302_-	1	0	0	0	1	1	1	1	1	0	0
15:000000000-AVD4R:1:1104:10771:7228_1_250_-	1	0	0	0	0	0	0	0	0	1	1	Bacteria	Firmicutes	Clostridia	Clostridiales
15:000000000-AVD4R:1:1104:11807:10361_1_358_-	0	0	0	0	0	0	0	0	1	0	0	Bacteria	Bacteroidetes	Bacteroidia	Bacteroidales							[G] Carbohydrate transport and metabolism
15:000000000-AVD4R:1:1104:11905:17202_1_297_+	2	2	0	1	0	0	0	1	0	3	1	Bacteria	Firmicutes	Clostridia	Clostridiales	Lachnospiraceae
15:000000000-AVD4R:1:1104:12118:20080_1_224_-	0	1	0	1	0	0	0	0	0	0	0
15:000000000-AVD4R:1:1104:12230:23086_1_278_-	0	0	1	1	1	1	1	1	0	0	1
15:000000000-AVD4R:1:1104:12488:9152_1_366_+	0	0	0	0	0	0	0	3	0	0	0	Bacteria	Bacteroidetes	Bacteroidia	Bacteroidales	Bacteroidaceae	Bacteroides	Bacteroides caecimuris
15:000000000-AVD4R:1:1104:12610:5204_57_223_+	0	0	0	0	0	0	1	0	0	1	0	Eukaryota	Chordata	Mammalia	Rodentia							[I] Lipid transport and metabolism
15:000000000-AVD4R:1:1104:12765:11348_1_260_-	0	1	2	2	2	2	2	1	1	1	1	Bacteria	Bacteroidetes						Elongation factor G (EF-G)	TRAFAC class translation factor GTPase superfamily, Classic translation factor GTPase family, EF-G/EF-2 subfamily	Translation elongation factor EFG/EF2	[J] Translation, ribosomal structure and biogenesis		K02355
15:000000000-AVD4R:1:1104:14857:16973_1_330_-	0	1	0	0	0	0	0	0	0	0	0	Bacteria	Firmicutes	Clostridia	Clostridiales
15:000000000-AVD4R:1:1104:15397:9953_1_271_+	4	0	0	0	0	0	0	0	0	0	0	Bacteria	Firmicutes	Clostridia	Clostridiales	Oscillospiraceae	Oscillibacter	Oscillibacter sp. ER4
15:000000000-AVD4R:1:1104:15588:4016_1_145_+	0	1	0	1	1	0	0	1	0	1	2	Bacteria	Firmicutes	Clostridia	Clostridiales	Oscillospiraceae			Glyceraldehyde-3-phosphate dehydrogenase (GAPDH) (EC 1.2.1.12) (NAD-dependent glyceraldehyde-3-phosphate dehydrogenase)	Glyceraldehyde-3-phosphate dehydrogenase family	Glyceraldehyde/Erythrose phosphate dehydrogenase family	[G] Carbohydrate transport and metabolism	glycolysis	K00134	1.2.1.12
15:000000000-AVD4R:1:1104:16187:6015_1_238_+	3	0	0	0	0	0	0	0	0	0	0
15:000000000-AVD4R:1:1104:16862:8077_1_305_-	0	0	1	1	0	0	0	0	1	2	3	Bacteria	Bacteroidetes	Bacteroidia	Bacteroidales
15:000000000-AVD4R:1:1104:17259:12573_1_225_-	0	0	0	1	0	0	0	1	0	1	1	Bacteria	Firmicutes									[G] Carbohydrate transport and metabolism
15:000000000-AVD4R:1:1104:18352:14018_1_316_+	0	0	0	0	0	0	1	1	0	0	2	Bacteria	Firmicutes
15:000000000-AVD4R:1:1104:18493:21949_1_218_-	0	0	0	4	0	0	0	1	0	0	0
15:000000000-AVD4R:1:1104:18603:21229_1_222_-	0	0	0	1	0	0	0	0	0	0	0	Bacteria	Bacteroidetes	Bacteroidia	Bacteroidales	Bacteroidaceae
15:000000000-AVD4R:1:1104:18782:5252_1_253_+	0	0	0	0	0	1	0	0	1	0	0
15:000000000-AVD4R:1:1104:18905:18845_1_313_+	0	0	1	0	0	0	0	0	0	0	0	Bacteria	Bacteroidetes	Bacteroidia	Bacteroidales				Methylmalonyl-CoA mutase large subunit (EC 5.4.99.2) (MCM-alpha)	Methylmalonyl-CoA mutase family		[I] Lipid transport and metabolism	propanoyl-CoA degradation	K01847	5.4.99.2
15:000000000-AVD4R:1:1104:19782:1164_1_279_+	3	5	2	3	3	1	2	0	1	4	1	Bacteria	Bacteroidetes	Bacteroidia	Bacteroidales							[P] Inorganic ion transport and metabolism
15:000000000-AVD4R:1:1104:20773:20433_1_367_-	0	0	1	0	0	1	1	1	1	0	0	Bacteria	Firmicutes						50S ribosomal protein L15	Universal ribosomal protein uL15 family		[J] Translation, ribosomal structure and biogenesis		K02876
15:000000000-AVD4R:1:1104:21053:2769_1_304_+	0	0	0	0	0	0	0	0	0	1	0	Bacteria	Firmicutes						Argininosuccinate synthase (EC 6.3.4.5) (Citrulline--aspartate ligase)	Argininosuccinate synthase family, Type 1 subfamily	Argininosuccinate synthase, type 1 subfamily	[E] Amino acid transport and metabolism	L-arginine biosynthesis	K01940	6.3.4.5
15:000000000-AVD4R:1:1104:21140:18946_1_226_+	1	0	0	1	0	1	0	3	0	1	2	Bacteria	Firmicutes	Clostridia	Clostridiales						O-antigen ligase-related	[G] Carbohydrate transport and metabolism
15:000000000-AVD4R:1:1104:21529:12231_1_287_-	1	1	1	1	1	1	1	1	0	0	1	Bacteria	Bacteroidetes	Bacteroidia	Bacteroidales	Rikenellaceae	Alistipes		2-amino-3-ketobutyrate coenzyme A ligase (AKB ligase) (KBL) (EC 2.3.1.29) (Glycine acetyltransferase)	Class-II pyridoxal-phosphate-dependent aminotransferase family	2-amino-3-ketobutyrate coenzyme A ligase	[H] Coenzyme transport and metabolism	L-threonine degradation via oxydo-reductase pathway	K00639	2.3.1.29
15:000000000-AVD4R:1:1104:22091:12522_1_274_-	0	2	0	0	0	0	0	0	0	0	0
15:000000000-AVD4R:1:1104:22191:2609_1_346_+	0	0	0	0	0	2	1	0	0	0	0	Bacteria							L-asparaginase 1 (EC 3.5.1.1) (L-asparaginase I) (L-ASNase I) (L-asparagine amidohydrolase I)	Asparaginase 1 family	Asparaginase/glutaminase	[E] Amino acid transport and metabolism		K01424	3.5.1.1
15:000000000-AVD4R:1:1104:22523:13933_1_308_-	0	1	0	0	0	0	0	0	0	0	0	Bacteria	Bacteroidetes	Bacteroidia	Bacteroidales	Porphyromonadaceae						[P] Inorganic ion transport and metabolism
15:000000000-AVD4R:1:1104:23029:4194_1_365_+	1	0	0	1	0	0	0	1	0	1	1	Bacteria	Firmicutes	Clostridia	Clostridiales				Cellobiose phosphorylase (EC 2.4.1.20)	Glycosyl hydrolase 94 family			cellulose degradation	K00702	2.4.1.20
15:000000000-AVD4R:1:1104:23450:13644_1_229_-	0	0	1	0	0	0	0	0	1	0	0	Bacteria	Bacteroidetes	Bacteroidia	Bacteroidales	Bacteroidaceae	Bacteroides		TonB-dependent receptor SusC (Starch-utilization system protein C)	TonB-dependent receptor family			starch degradation	K21573
15:000000000-AVD4R:1:1104:23566:15856_1_286_-	0	1	0	0	0	0	0	0	2	0	0	Bacteria	Bacteroidetes	Bacteroidia	Bacteroidales				DNA protection during starvation protein (EC 1.16.-.-)	Dps family	DNA-binding protein Dps	[P] Inorganic ion transport and metabolism		K04047	1.16.-.-
15:000000000-AVD4R:1:1104:23840:12410_1_335_+	1	1	1	1	1	1	1	0	1	1	1	Bacteria	Bacteroidetes	Bacteroidia	Bacteroidales				50S ribosomal protein L25 (General stress protein CTC)	Bacterial ribosomal protein bL25 family, CTC subfamily	Ribosomal protein L25	[J] Translation, ribosomal structure and biogenesis		K02897
15:000000000-AVD4R:1:1104:23857:14957_1_289_+	1	0	0	0	0	0	0	0	0	0	1	Bacteria	Firmicutes	Clostridia	Clostridiales				ABC transporter glutamine-binding protein GlnH	Bacterial solute-binding protein 3 family				K10039
15:000000000-AVD4R:1:1104:24132:9302_1_346_+	1	1	0	1	0	1	0	0	3	0	0	Bacteria	Bacteroidetes	Bacteroidia	Bacteroidales				50S ribosomal protein L7/L12	Bacterial ribosomal protein bL12 family	Ribosomal protein L7/L12	[J] Translation, ribosomal structure and biogenesis		K02935
15:000000000-AVD4R:1:1104:26532:13762_1_260_-	0	0	0	0	0	1	0	0	0	0	0	Bacteria	Bacteroidetes	Bacteroidia	Bacteroidales			Bacteroidales bacterium 52_46
15:000000000-AVD4R:1:1104:27715:8776_1_244_+	0	0	0	1	1	0	0	0	0	0	0	Bacteria	Firmicutes						Caffeyl-CoA reductase-Etf complex subunit CarE (EC 1.3.1.108) (Electron transfer flavoprotein large subunit) (ETFLS) (Electron transfer flavoprotein subunit alpha) (Alpha-ETF)	ETF alpha-subunit/FixB family	Electron transfer flavoprotein, alpha subunit	[C] Energy production and conversion		K03522	1.3.1.108
15:000000000-AVD4R:1:1104:28564:17001_1_378_-	0	0	0	0	0	0	0	0	0	0	1
15:000000000-AVD4R:1:1104:29087:15232_1_165_+	0	0	0	1	1	0	0	0	0	0	0	Bacteria	Firmicutes	Clostridia	Clostridiales				Electron transfer flavoprotein subunit alpha (Alpha-ETF) (Electron transfer flavoprotein large subunit) (ETFLS)	ETF alpha-subunit/FixB family	Electron transfer flavoprotein, alpha subunit	[C] Energy production and conversion		K03522
15:000000000-AVD4R:1:1104:4414:11751_1_238_+	1	1	1	1	1	1	1	1	0	0	0
15:000000000-AVD4R:1:1104:4794:11304_1_372_+	0	0	0	0	0	0	0	0	0	1	0	Bacteria	Bacteroidetes	Bacteroidia					50S ribosomal protein L11	Universal ribosomal protein uL11 family	Ribosomal protein L11, bacterial-type	[J] Translation, ribosomal structure and biogenesis		K02867
15:000000000-AVD4R:1:1104:5049:8354_1_312_-	0	0	1	1	0	1	1	0	0	0	0	Bacteria	Bacteroidetes	Bacteroidia	Bacteroidales				Alkyl hydroperoxide reductase C (EC 1.11.1.15) (General stress protein 22) (Peroxiredoxin) (Thioredoxin peroxidase)	Peroxiredoxin family, AhpC/Prx1 subfamily	Alkyl hydroperoxide reductase subunit C	[O] Posttranslational modification, protein turnover, chaperones		K03386	1.11.1.15
15:000000000-AVD4R:1:1104:5286:19325_1_248_+	0	1	0	1	0	1	1	1	0	1	0	Bacteria	Firmicutes	Clostridia	Clostridiales				Alpha-glucoside transport system permease protein AglG	Binding-protein-dependent transport system permease family, MalFG subfamily	sn-glycerol-3-phosphate transport system permease protein UgpE			K10234
15:000000000-AVD4R:1:1104:5481:19777_1_301_-	1	1	0	0	1	2	1	1	1	0	0
15:000000000-AVD4R:1:1104:5572:6717_1_317_-	0	0	0	0	1	0	0	0	0	0	0
15:000000000-AVD4R:1:1104:5686:8066_1_331_-	0	0	0	0	1	0	0	0	0	0	0
15:000000000-AVD4R:1:1104:5744:16679_1_292_+	0	0	0	0	0	0	0	0	0	3	3
15:000000000-AVD4R:1:1104:6424:16668_1_297_-	0	0	0	0	0	0	0	0	1	0	0	Bacteria	Bacteroidetes	Bacteroidia	Bacteroidales							[P] Inorganic ion transport and metabolism
15:000000000-AVD4R:1:1104:6466:20389_1_293_+	0	0	0	0	0	0	0	0	0	0	1	Bacteria	Firmicutes	Clostridia	Clostridiales	Eubacteriaceae	Eubacterium	Eubacterium sp. CAG:115
15:000000000-AVD4R:1:1104:6939:14636_1_349_-	0	0	0	0	0	0	0	0	0	0	1	Bacteria	Firmicutes	Clostridia	Clostridiales	Lachnospiraceae						[H] Coenzyme transport and metabolism
15:000000000-AVD4R:1:1104:7604:16673_1_225_+	0	0	0	0	0	0	0	0	0	0	1
15:000000000-AVD4R:1:1104:7794:8016_1_327_+	1	0	0	0	0	0	0	0	0	0	1
15:000000000-AVD4R:1:1104:7937:6174_1_318_-	0	0	0	1	0	0	0	0	0	0	0	Bacteria	Bacteroidetes	Bacteroidia					Chaperone protein DnaK (HSP70) (Heat shock 70 kDa protein) (Heat shock protein 70)	Heat shock protein 70 family	Heat shock protein 70 family	[O] Posttranslational modification, protein turnover, chaperones		K04043
15:000000000-AVD4R:1:1104:7968:10206_1_231_-	0	0	0	0	0	1	1	3	3	2	0
15:000000000-AVD4R:1:1104:9069:3537_1_296_+	0	0	0	0	0	0	0	0	2	0	0	Bacteria							60 kDa chaperonin (GroEL protein) (Protein Cpn60)	Chaperonin (HSP60) family		[O] Posttranslational modification, protein turnover, chaperones		K04077
15:000000000-AVD4R:1:1104:9155:10622_1_189_+	1	1	1	0	0	0	0	0	0	1	0	Bacteria	Bacteroidetes	Bacteroidia	Bacteroidales	Prevotellaceae	Prevotella	Prevotella stercorea	Reverse rubrerythrin-1 (revRbr 1) (NADH peroxidase) (NPXase) (Npx) (EC 1.11.1.1) (Rubperoxin 1) (Rpr 1)			[C] Energy production and conversion			1.11.1.1
15:000000000-AVD4R:1:1104:9212:16085_1_332_-	1	0	0	0	0	0	0	0	0	1	1	Bacteria							D-hydantoinase (EC 3.5.2.-)	Metallo-dependent hydrolases superfamily, Hydantoinase/dihydropyrimidinase family		[F] Nucleotide transport and metabolism			3.5.2.-
15:000000000-AVD4R:1:1105:10160:18549_1_217_-	0	0	3	0	0	0	0	0	2	0	0
15:000000000-AVD4R:1:1105:10630:5723_1_338_-	0	0	1	0	0	1	1	0	1	0	0	Bacteria	Bacteroidetes	Bacteroidia	Bacteroidales				Translation initiation factor IF-2	TRAFAC class translation factor GTPase superfamily, Classic translation factor GTPase family, IF-2 subfamily	Translation initiation factor aIF-2, bacterial-like	[J] Translation, ribosomal structure and biogenesis		K02519
15:000000000-AVD4R:1:1105:11479:14846_1_261_-	0	0	0	0	0	0	0	0	1	0	0	Bacteria	Bacteroidetes
15:000000000-AVD4R:1:1105:11787:16723_1_294_+	0	0	0	0	6	0	0	0	0	0	0
15:000000000-AVD4R:1:1105:12022:15275_1_348_+	0	0	1	0	0	0	0	0	0	0	0
15:000000000-AVD4R:1:1105:12896:19160_1_285_-	0	0	0	0	1	2	2	1	0	0	0	Bacteria	Bacteroidetes	Bacteroidia	Bacteroidales	Prevotellaceae	Prevotella	Prevotella sp. CAG:1031
15:000000000-AVD4R:1:1105:12950:3837_1_271_-	0	1	0	0	0	0	0	0	0	0	0	Bacteria	Bacteroidetes	Bacteroidia	Bacteroidales	Prevotellaceae	Prevotella	Prevotella sp. CAG:1031			NAD-dependent DNA ligase	[M] Cell wall/membrane/envelope biogenesis
15:000000000-AVD4R:1:1105:12975:15613_105_250_-	1	1	1	1	1	3	1	2	1	1	1	Bacteria	Bacteroidetes	Bacteroidia	Bacteroidales
15:000000000-AVD4R:1:1105:13514:22191_1_226_-	0	0	0	1	0	0	0	0	0	0	0	Bacteria	Firmicutes	Clostridia	Clostridiales	Lachnospiraceae		Lachnospiraceae bacterium 10-1			Fagellar hook-basal body protein, FlgE/F/G
15:000000000-AVD4R:1:1105:13900:12436_1_305_-	0	0	0	0	0	0	0	0	0	1	1	Bacteria	Bacteroidetes	Bacteroidia	Bacteroidales			Bacteroidales bacterium 52_46				[G] Carbohydrate transport and metabolism
15:000000000-AVD4R:1:1105:13904:16822_1_375_+	0	1	0	0	0	0	0	0	0	0	0	Bacteria	Firmicutes	Clostridia	Clostridiales	Lachnospiraceae	Roseburia	Roseburia faecis	Chaperone protein DnaK (HSP70) (Heat shock 70 kDa protein) (Heat shock protein 70)	Heat shock protein 70 family	Heat shock protein 70 family	[O] Posttranslational modification, protein turnover, chaperones		K04043
15:000000000-AVD4R:1:1105:14239:10069_1_323_-	0	0	2	0	0	0	0	0	1	0	2	Bacteria	Firmicutes	Bacilli	Lactobacillales
15:000000000-AVD4R:1:1105:14305:18664_1_339_-	1	0	0	0	1	0	0	0	0	0	0	Bacteria	Firmicutes	Clostridia	Clostridiales				Acetyl-CoA acetyltransferase (EC 2.3.1.9) (Acetoacetyl-CoA thiolase) (Beta-ketothiolase)	Thiolase family		[I] Lipid transport and metabolism	poly-(R)-3-hydroxybutanoate biosynthesis	K00626	2.3.1.9
15:000000000-AVD4R:1:1105:14575:22760_1_331_+	4	1	3	1	2	3	4	4	0	2	0
15:000000000-AVD4R:1:1105:14731:9848_1_276_-	0	0	0	0	0	0	0	0	1	0	0	Bacteria	Bacteroidetes	Bacteroidia	Bacteroidales	Prevotellaceae	Prevotella
15:000000000-AVD4R:1:1105:14908:18431_1_206_-	0	0	0	4	2	0	0	0	0	0	0	Bacteria	Bacteroidetes	Bacteroidia	Bacteroidales	Bacteroidaceae						[P] Inorganic ion transport and metabolism
15:000000000-AVD4R:1:1105:15181:8664_1_208_-	0	0	0	1	0	0	1	0	0	0	0	Bacteria							Acyl carrier protein (ACP)	Acyl carrier protein (ACP) family	Acyl carrier protein (ACP)		fatty acid biosynthesis	K02078
15:000000000-AVD4R:1:1105:16433:1250_1_235_-	0	0	0	0	0	0	2	0	0	0	0	Bacteria									Asparaginase/glutaminase	[E] Amino acid transport and metabolism
15:000000000-AVD4R:1:1105:16812:13651_1_238_+	1	1	0	1	0	1	1	1	1	1	1	Bacteria	Firmicutes	Clostridia	Clostridiales				NADP-specific glutamate dehydrogenase (NADP-GDH) (EC 1.4.1.4)	Glu/Leu/Phe/Val dehydrogenases family	Glutamate dehydrogenase	[E] Amino acid transport and metabolism		K00262	1.4.1.4
15:000000000-AVD4R:1:1105:17365:20855_1_362_+	0	0	0	0	0	0	1	0	0	0	0	Bacteria	Bacteroidetes	Bacteroidia	Bacteroidales				Pyruvate synthase (EC 1.2.7.1) (Pyruvate-ferredoxin oxidoreductase) (POR)		Pyruvate-flavodoxin oxidoreductase	[C] Energy production and conversion			1.2.7.1
15:000000000-AVD4R:1:1105:17830:6615_1_282_-	0	0	0	0	0	1	1	1	0	0	0	Bacteria	Bacteroidetes	Bacteroidia	Bacteroidales				ATP synthase subunit beta 1 (EC 3.6.3.14) (ATP synthase F1 sector subunit beta 1) (F-ATPase subunit beta 1)	ATPase alpha/beta chains family	ATPase, F1 complex, beta subunit			K02112	3.6.3.14
15:000000000-AVD4R:1:1105:17973:8377_1_294_-	0	0	1	1	0	0	0	0	1	2	2	Bacteria	Bacteroidetes	Bacteroidia	Bacteroidales	Prevotellaceae	Prevotella
15:000000000-AVD4R:1:1105:18042:16890_1_253_+	2	1	0	0	0	0	0	3	0	0	0	Bacteria	Firmicutes	Clostridia	Clostridiales	Lachnospiraceae	Roseburia	Roseburia sp. CAG:309				[G] Carbohydrate transport and metabolism
15:000000000-AVD4R:1:1105:18083:9460_1_323_+	2	3	0	0	0	0	0	1	0	4	5	Bacteria	Firmicutes								Flagellin	[N] Cell motility
15:000000000-AVD4R:1:1105:18400:12150_1_242_-	0	0	0	0	2	0	0	0	0	1	0	Bacteria	Firmicutes						Flagellin	Bacterial flagellin family	Flagellin	[N] Cell motility		K02406
15:000000000-AVD4R:1:1105:18504:8708_1_269_+	1	0	1	0	0	1	1	1	0	0	1	Bacteria	Bacteroidetes	Bacteroidia	Bacteroidales	Prevotellaceae	Prevotella
15:000000000-AVD4R:1:1105:19020:17109_1_260_-	0	0	0	0	1	0	1	1	0	0	0	Bacteria	Bacteroidetes	Bacteroidia	Bacteroidales	Prevotellaceae	Prevotella
15:000000000-AVD4R:1:1105:19603:22388_1_295_+	0	0	0	0	0	0	0	0	0	2	2
15:000000000-AVD4R:1:1105:19649:5244_1_234_+	0	0	0	0	0	0	0	0	1	0	0	Bacteria	Bacteroidetes	Bacteroidia	Bacteroidales				Glutamate decarboxylase beta (GAD-beta) (EC 4.1.1.15)	Group II decarboxylase family	Glutamate decarboxylase	[E] Amino acid transport and metabolism		K01580	4.1.1.15
15:000000000-AVD4R:1:1105:19690:17208_162_265_-	0	0	0	1	1	0	0	0	0	0	0
15:000000000-AVD4R:1:1105:20759:9405_1_324_+	0	0	0	0	1	0	0	0	0	0	0	Bacteria	Bacteroidetes	Bacteroidia	Bacteroidales	Prevotellaceae	Prevotella				Ferritin	[P] Inorganic ion transport and metabolism
15:000000000-AVD4R:1:1105:20935:13176_1_209_+	0	0	0	0	0	0	1	1	0	0	0	Bacteria							Xylose isomerase (EC 5.3.1.5)	Xylose isomerase family	Xylose isomerase, bacterial-type	[G] Carbohydrate transport and metabolism		K01805	5.3.1.5
15:000000000-AVD4R:1:1105:21093:2432_1_238_+	0	0	0	0	0	0	1	0	2	0	0	Bacteria	Bacteroidetes	Bacteroidia	Bacteroidales				30S ribosomal protein S12	Universal ribosomal protein uS12 family	Ribosomal protein S12/S23	[J] Translation, ribosomal structure and biogenesis		K02950
15:000000000-AVD4R:1:1105:21309:1670_1_250_-	0	0	1	0	0	1	0	0	0	0	0	Bacteria	Bacteroidetes	Bacteroidia	Bacteroidales			Bacteroidales bacterium 52_46
15:000000000-AVD4R:1:1105:21391:23043_1_156_-	1	0	0	0	0	0	0	0	0	0	0	Bacteria	Firmicutes	Clostridia	Clostridiales				NAD-dependent dihydropyrimidine dehydrogenase subunit PreT homolog (DPD) (EC 1.3.1.1) (Dihydrothymine dehydrogenase) (Dihydrouracil dehydrogenase)	NADH dehydrogenase family		[E] Amino acid transport and metabolism		K17722	1.3.1.1
15:000000000-AVD4R:1:1105:21993:14745_1_209_-	0	0	0	0	0	0	0	0	0	1	0	Bacteria	Firmicutes	Clostridia	Clostridiales	Oscillospiraceae	Oscillibacter
15:000000000-AVD4R:1:1105:22070:8888_1_237_-	0	0	0	0	1	1	0	0	1	1	0	Bacteria	Bacteroidetes	Bacteroidia	Bacteroidales				30S ribosomal protein S1	Bacterial ribosomal protein bS1 family	Ribosomal protein S1	[J] Translation, ribosomal structure and biogenesis		K02945
15:000000000-AVD4R:1:1105:22377:16725_1_282_+	0	0	0	0	1	3	1	0	0	0	0
15:000000000-AVD4R:1:1105:22543:3553_1_221_+	0	0	0	0	1	0	0	0	0	0	0	Bacteria	Bacteroidetes	Bacteroidia	Bacteroidales	Porphyromonadaceae
15:000000000-AVD4R:1:1105:23235:17255_1_238_-	1	0	0	0	0	0	0	1	0	0	0	Bacteria	Firmicutes	Clostridia	Clostridiales			Clostridiales bacterium	Multiple sugar-binding periplasmic receptor ChvE	Bacterial solute-binding protein 2 family		[G] Carbohydrate transport and metabolism		K10546
15:000000000-AVD4R:1:1105:24227:11319_1_299_-	0	0	0	0	0	0	0	1	0	0	0	Bacteria	Bacteroidetes						Serine hydroxymethyltransferase (SHMT) (Serine methylase) (EC 2.1.2.1)	SHMT family	Serine hydroxymethyltransferase	[E] Amino acid transport and metabolism	tetrahydrofolate interconversion	K00600	2.1.2.1
15:000000000-AVD4R:1:1105:25452:16297_1_212_-	0	0	0	0	0	0	0	0	0	1	1
15:000000000-AVD4R:1:1105:25568:17685_1_267_-	0	1	0	0	0	0	0	0	0	2	2	Bacteria							Glyceraldehyde-3-phosphate dehydrogenase (GAPDH) (EC 1.2.1.12) (NAD-dependent glyceraldehyde-3-phosphate dehydrogenase)	Glyceraldehyde-3-phosphate dehydrogenase family	Glyceraldehyde/Erythrose phosphate dehydrogenase family	[G] Carbohydrate transport and metabolism	glycolysis	K00134	1.2.1.12
15:000000000-AVD4R:1:1105:25717:6949_1_216_-	0	0	0	0	0	1	1	1	0	1	1	Bacteria	Firmicutes						Oligopeptide-binding protein OppA (Stage 0 sporulation protein KA)	Bacterial solute-binding protein 5 family		[E] Amino acid transport and metabolism		K15580
15:000000000-AVD4R:1:1105:26093:19021_1_350_-	0	0	1	2	0	2	3	0	0	0	0	Bacteria	Bacteroidetes	Bacteroidia	Bacteroidales
15:000000000-AVD4R:1:1105:26268:4390_1_220_+	0	0	0	0	0	1	1	0	1	0	0	Eukaryota	Chordata	Mammalia	Rodentia	Muridae	Rattus	Rattus norvegicus
15:000000000-AVD4R:1:1105:27651:19768_1_180_+	0	0	0	0	0	0	0	0	2	0	0	Bacteria	Bacteroidetes	Bacteroidia	Bacteroidales							[C] Energy production and conversion
15:000000000-AVD4R:1:1105:28437:14339_1_256_-	2	2	2	2	1	0	0	0	2	0	0	Bacteria	Bacteroidetes	Bacteroidia	Bacteroidales
15:000000000-AVD4R:1:1105:4479:18580_1_340_-	0	1	0	0	1	1	1	1	0	0	2	Bacteria	Firmicutes	Clostridia	Clostridiales	Lachnospiraceae			Flagellin	Bacterial flagellin family	Flagellin	[N] Cell motility		K02406
15:000000000-AVD4R:1:1105:5317:4690_1_306_-	0	0	0	0	0	0	0	0	0	2	2	Bacteria	Spirochaetes	Spirochaetia	Spirochaetales
15:000000000-AVD4R:1:1105:5791:9396_1_331_-	0	0	0	0	0	0	0	0	0	0	1	Bacteria	Firmicutes									[E] Amino acid transport and metabolism
15:000000000-AVD4R:1:1105:6719:3871_1_271_+	0	0	1	0	0	0	0	0	0	0	0	Bacteria	Bacteroidetes						Outer membrane protein A	OmpA family		[N] Cell motility
15:000000000-AVD4R:1:1105:7064:3772_166_239_+	0	0	0	2	0	0	0	1	0	1	1	Eukaryota	Chordata	Mammalia							Serotransferrin, mammalian	[O] Posttranslational modification, protein turnover, chaperones
15:000000000-AVD4R:1:1105:7486:14889_1_217_-	0	0	0	0	0	0	0	0	0	0	1	Bacteria									Leu/Ile/Val-binding protein	[E] Amino acid transport and metabolism
15:000000000-AVD4R:1:1105:8602:15406_1_328_-	0	0	0	0	0	0	0	1	0	0	0	Bacteria	Firmicutes
15:000000000-AVD4R:1:1105:9388:14926_1_361_+	0	0	0	1	0	0	0	0	0	0	0	Bacteria	Bacteroidetes	Bacteroidia	Bacteroidales				Phosphoserine aminotransferase (EC 2.6.1.52) (Phosphohydroxythreonine aminotransferase) (PSAT)	Class-V pyridoxal-phosphate-dependent aminotransferase family, SerC subfamily	Phosphoserine aminotransferase	[E] Amino acid transport and metabolism	L-serine biosynthesis	K00831	2.6.1.52
15:000000000-AVD4R:1:1105:9870:10008_1_241_-	1	1	0	0	0	0	0	0	1	0	0
15:000000000-AVD4R:1:1105:9901:13612_1_282_-	0	0	0	0	4	0	0	0	0	0	0
15:000000000-AVD4R:1:1106:10540:15482_1_343_+	0	0	3	2	0	0	0	0	0	0	0
15:000000000-AVD4R:1:1106:10874:7329_18_237_-	0	0	0	0	0	1	1	1	0	0	1	Bacteria	Firmicutes									[P] Inorganic ion transport and metabolism
15:000000000-AVD4R:1:1106:10939:15758_1_227_+	1	1	0	1	1	0	0	0	0	1	1
15:000000000-AVD4R:1:1106:11226:8170_1_309_+	0	0	0	0	1	1	1	1	0	0	0	Bacteria	Bacteroidetes	Bacteroidia	Bacteroidales							[C] Energy production and conversion
15:000000000-AVD4R:1:1106:11487:9524_1_206_+	0	0	1	0	1	0	0	0	0	0	0
15:000000000-AVD4R:1:1106:11660:10308_1_352_-	0	1	1	0	0	1	1	1	1	0	0	Bacteria	Bacteroidetes	Bacteroidia	Bacteroidales	Prevotellaceae	Prevotella					[P] Inorganic ion transport and metabolism
15:000000000-AVD4R:1:1106:12122:5619_1_278_-	0	0	0	1	1	0	0	0	0	0	0	Bacteria	Bacteroidetes	Bacteroidia	Bacteroidales				30S ribosomal protein S16	Bacterial ribosomal protein bS16 family	Ribosomal protein S16	[J] Translation, ribosomal structure and biogenesis		K02959
15:000000000-AVD4R:1:1106:12933:8414_1_216_+	0	0	1	1	0	0	0	0	0	0	0	Bacteria	Bacteroidetes	Bacteroidia	Bacteroidales			Bacteroidales bacterium 52_46
15:000000000-AVD4R:1:1106:13183:21367_75_259_+	1	2	3	4	4	5	2	2	2	2	3	Bacteria	Firmicutes	Clostridia	Clostridiales	Peptostreptococcaceae	Romboutsia	Romboutsia ilealis	Small, acid-soluble spore protein alpha (ASSP) (SASP)	Alpha/beta-type SASP family	Small acid-soluble spore protein, alpha/beta-type
15:000000000-AVD4R:1:1106:13461:6887_1_371_-	0	0	0	1	0	0	0	0	0	0	0	Bacteria	Bacteroidetes	Bacteroidia	Bacteroidales
15:000000000-AVD4R:1:1106:14407:15245_11_299_-	0	0	0	1	0	1	1	1	0	0	0	Bacteria	Bacteroidetes	Bacteroidia					50S ribosomal protein L1	Universal ribosomal protein uL1 family	Ribosomal protein L1/ribosomal biogenesis protein	[J] Translation, ribosomal structure and biogenesis		K02863
15:000000000-AVD4R:1:1106:14868:18280_19_369_-	0	0	0	0	0	0	0	0	0	1	1	Bacteria	Firmicutes	Clostridia	Clostridiales
15:000000000-AVD4R:1:1106:15157:14774_1_269_-	0	0	0	0	0	0	0	0	0	1	0
15:000000000-AVD4R:1:1106:15250:16858_1_357_+	0	0	0	1	0	0	0	0	0	0	0	Bacteria	Firmicutes	Clostridia	Clostridiales	Lachnospiraceae			Putative sensory transducer protein		Chemotaxis methyl-accepting receptor			K03406
15:000000000-AVD4R:1:1106:15358:22297_1_264_-	0	0	0	0	0	0	0	0	0	1	1	Bacteria	Firmicutes						4-hydroxy-3-methylbut-2-enyl diphosphate reductase (HMBPP reductase) (EC 1.17.7.4)	IspH family	Ribosomal protein S1	[J] Translation, ribosomal structure and biogenesis	dimethylallyl diphosphate biosynthesis	K02945	1.17.7.4
15:000000000-AVD4R:1:1106:16037:15392_1_372_+	0	0	0	0	0	1	1	1	0	0	0	Bacteria	Bacteroidetes	Bacteroidia	Bacteroidales	Prevotellaceae	Paraprevotella
15:000000000-AVD4R:1:1106:16158:2811_1_243_+	0	0	0	0	0	0	0	0	1	0	0
15:000000000-AVD4R:1:1106:16389:17823_1_128_+	0	0	0	1	0	0	0	0	0	0	0	Bacteria	Firmicutes						50S ribosomal protein L20	Bacterial ribosomal protein bL20 family	Ribosomal protein L20	[J] Translation, ribosomal structure and biogenesis		K02887
15:000000000-AVD4R:1:1106:17426:5863_1_229_+	0	2	0	3	0	1	0	0	0	0	1
15:000000000-AVD4R:1:1106:17858:20581_87_352_-	0	0	0	0	0	0	0	0	1	0	0	Bacteria	Bacteroidetes	Bacteroidia	Bacteroidales				Thioredoxin (Trx)	Thioredoxin family	Thioredoxin	[O] Posttranslational modification, protein turnover, chaperones		K03671
15:000000000-AVD4R:1:1106:17913:16625_1_308_-	0	0	0	0	0	1	1	0	0	0	0	Bacteria	Bacteroidetes	Bacteroidia	Bacteroidales
15:000000000-AVD4R:1:1106:18506:15633_1_213_+	0	0	0	2	1	0	1	0	2	0	0	Bacteria	Bacteroidetes	Bacteroidia	Bacteroidales						Pseudouridine synthase, RsuA/RluB/E/F	[J] Translation, ribosomal structure and biogenesis
15:000000000-AVD4R:1:1106:18516:12807_1_219_+	1	1	1	2	1	1	1	1	1	2	1	Bacteria							Flagellin	Bacterial flagellin family	Flagellin	[N] Cell motility		K02406
15:000000000-AVD4R:1:1106:18654:18267_1_372_-	0	1	1	0	2	1	2	1	3	2	0	Bacteria	Bacteroidetes	Bacteroidia	Bacteroidales
15:000000000-AVD4R:1:1106:18751:4372_16_207_-	0	0	0	0	0	0	0	0	1	0	0	Bacteria	Bacteroidetes	Bacteroidia
15:000000000-AVD4R:1:1106:20072:16576_1_314_-	1	1	1	1	1	1	1	1	1	1	0	Bacteria	Bacteroidetes	Bacteroidia	Bacteroidales				DNA-directed RNA polymerase subunit beta' (RNAP subunit beta') (EC 2.7.7.6) (RNA polymerase subunit beta') (Transcriptase subunit beta')	RNA polymerase beta' chain family	DNA-directed RNA polymerase, subunit beta-prime	[K] Transcription		K03046	2.7.7.6
15:000000000-AVD4R:1:1106:20407:12980_1_283_+	0	0	1	0	0	0	0	0	0	0	0	Bacteria	Bacteroidetes	Bacteroidia	Bacteroidales						Formyl-CoA:oxalate CoA-transferase	[C] Energy production and conversion
15:000000000-AVD4R:1:1106:20560:13898_1_230_-	0	0	1	0	0	1	0	0	0	0	0	Bacteria	Bacteroidetes	Bacteroidia	Bacteroidales	Prevotellaceae	Prevotella
15:000000000-AVD4R:1:1106:20740:3545_1_252_+	0	0	0	0	0	0	0	0	0	1	0	Bacteria	Bacteroidetes	Bacteroidia	Bacteroidales							[P] Inorganic ion transport and metabolism
15:000000000-AVD4R:1:1106:20975:6575_1_240_-	0	0	1	1	0	0	0	0	1	1	1	Bacteria							Phosphoenolpyruvate carboxykinase (ATP) (PCK) (PEP carboxykinase) (PEPCK) (EC 4.1.1.49)	Phosphoenolpyruvate carboxykinase (ATP) family	Phosphoenolpyruvate carboxykinase, ATP-utilising	[C] Energy production and conversion	gluconeogenesis	K01610	4.1.1.49
15:000000000-AVD4R:1:1106:22636:13650_1_288_-	0	0	1	0	0	0	0	0	0	0	0	Bacteria	Bacteroidetes	Bacteroidia	Bacteroidales
15:000000000-AVD4R:1:1106:23050:15360_1_228_-	0	0	0	2	0	0	0	0	0	0	0
15:000000000-AVD4R:1:1106:23212:19312_1_305_-	0	0	0	0	0	0	0	0	0	0	1	Bacteria	Firmicutes	Clostridia	Clostridiales	Lachnospiraceae		Lachnospiraceae bacterium COE1			Flagellin
15:000000000-AVD4R:1:1106:23315:17092_1_237_+	0	0	0	0	0	0	0	1	0	0	0	Bacteria	Firmicutes								Citrate carrier CitT-related
15:000000000-AVD4R:1:1106:23405:7827_199_346_-	0	1	2	1	0	0	0	0	1	2	2	Bacteria	Bacteroidetes	Bacteroidia	Bacteroidales	Prevotellaceae	Prevotella	Prevotella sp. CAG:279
15:000000000-AVD4R:1:1106:25038:19401_1_239_-	1	1	1	1	1	1	1	1	0	1	1	Bacteria	Bacteroidetes	Bacteroidia	Bacteroidales				4-deoxy-L-threo-5-hexosulose-uronate ketol-isomerase (EC 5.3.1.17) (5-keto-4-deoxyuronate isomerase) (DKI isomerase)	KduI family		[G] Carbohydrate transport and metabolism	pectin degradation	K01815	5.3.1.17
15:000000000-AVD4R:1:1106:25724:16333_1_303_-	1	1	0	0	0	0	0	1	0	1	1	Bacteria	Firmicutes	Clostridia	Clostridiales	Lachnospiraceae
15:000000000-AVD4R:1:1106:25883:14433_1_299_+	0	0	0	1	1	1	0	0	0	0	0	Bacteria	Bacteroidetes	Bacteroidia	Bacteroidales				30S ribosomal protein S2	Universal ribosomal protein uS2 family	Ribosomal protein S2, bacteria/mitochondria/plastid	[J] Translation, ribosomal structure and biogenesis		K02967
15:000000000-AVD4R:1:1106:26957:11398_1_373_+	0	0	0	1	0	0	0	0	0	0	0
15:000000000-AVD4R:1:1106:27394:15744_1_245_+	1	1	0	0	1	0	0	1	0	1	0	Bacteria	Bacteroidetes	Bacteroidia	Bacteroidales	Prevotellaceae	Prevotella				UbiA prenyltransferase domain containing protein 1
15:000000000-AVD4R:1:1106:27951:13648_1_325_-	3	0	0	0	1	0	0	0	0	0	0	Bacteria	Firmicutes	Clostridia	Clostridiales				Reverse rubrerythrin-1 (revRbr 1) (NADH peroxidase) (NPXase) (Npx) (EC 1.11.1.1) (Rubperoxin 1) (Rpr 1)			[C] Energy production and conversion			1.11.1.1
15:000000000-AVD4R:1:1106:28188:8265_1_318_+	0	0	0	0	1	0	0	0	0	0	0	Bacteria	Bacteroidetes	Bacteroidia	Bacteroidales	Prevotellaceae	Prevotella	Prevotella sp. CAG:485
15:000000000-AVD4R:1:1106:28805:12917_1_301_-	0	0	0	1	0	0	0	0	0	0	0
15:000000000-AVD4R:1:1106:28872:12097_1_279_+	0	0	0	1	0	0	0	0	0	0	0
15:000000000-AVD4R:1:1106:3720:19958_1_265_-	0	0	0	0	0	0	0	0	2	0	0	Bacteria	Bacteroidetes	Flavobacteriia	Flavobacteriales
15:000000000-AVD4R:1:1106:4642:12962_1_339_+	0	0	0	0	1	0	0	0	0	0	0	Bacteria	Firmicutes	Clostridia	Clostridiales				Phosphoenolpyruvate carboxykinase [GTP] (PEP carboxykinase) (PEPCK) (EC 4.1.1.32)	Phosphoenolpyruvate carboxykinase [GTP] family	Phosphoenolpyruvate carboxykinase, GTP-utilising		gluconeogenesis	K01596	4.1.1.32
15:000000000-AVD4R:1:1106:4797:5353_1_284_+	0	0	0	0	1	2	3	2	0	0	0	Bacteria	Bacteroidetes	Bacteroidia	Bacteroidales
15:000000000-AVD4R:1:1106:4851:11120_1_235_+	0	0	0	0	0	0	0	0	0	0	1	Bacteria	Firmicutes	Clostridia	Clostridiales	Oscillospiraceae	Oscillibacter
15:000000000-AVD4R:1:1106:5480:6082_1_268_-	0	0	0	0	0	1	0	0	0	0	0	Bacteria	Bacteroidetes						50S ribosomal protein L31 type B	Bacterial ribosomal protein bL31 family, Type B subfamily	Ribosomal protein L31 type B	[J] Translation, ribosomal structure and biogenesis		K02909
15:000000000-AVD4R:1:1106:6023:5197_1_244_-	0	1	0	2	0	0	0	0	0	0	0	Bacteria	Bacteroidetes	Bacteroidia	Bacteroidales
15:000000000-AVD4R:1:1106:6163:9133_1_273_-	0	0	1	1	0	0	1	0	0	0	0	Bacteria	Bacteroidetes	Bacteroidia	Bacteroidales				Glucose-6-phosphate isomerase (GPI) (EC 5.3.1.9) (Phosphoglucose isomerase) (PGI) (Phosphohexose isomerase) (PHI)	GPI family	Phosphoglucose isomerase (PGI)	[G] Carbohydrate transport and metabolism	gluconeogenesis	K01810	5.3.1.9
15:000000000-AVD4R:1:1106:7391:7880_1_242_-	0	0	0	0	0	0	0	0	0	0	2
15:000000000-AVD4R:1:1106:8089:4680_1_228_+	0	0	0	0	0	0	0	0	1	0	0	Bacteria	Bacteroidetes	Bacteroidia	Bacteroidales	Prevotellaceae	Prevotella		30S ribosomal protein S7	Universal ribosomal protein uS7 family	Ribosomal protein S7, bacterial/organellar-type	[J] Translation, ribosomal structure and biogenesis		K02992
15:000000000-AVD4R:1:1106:8173:5485_1_243_+	1	1	0	1	1	1	1	1	0	2	1	Bacteria	Firmicutes	Clostridia	Clostridiales				Uncharacterized protein YgeY	Peptidase M20A family		[E] Amino acid transport and metabolism
15:000000000-AVD4R:1:1106:8689:3358_1_284_+	0	1	0	0	0	0	0	0	0	0	0	Bacteria	Firmicutes									[G] Carbohydrate transport and metabolism
15:000000000-AVD4R:1:1106:9218:14016_1_224_+	0	0	1	0	0	0	1	0	1	0	0	Bacteria	Bacteroidetes	Bacteroidia	Bacteroidales				DNA-directed RNA polymerase subunit beta' (RNAP subunit beta') (EC 2.7.7.6) (RNA polymerase subunit beta') (Transcriptase subunit beta')	RNA polymerase beta' chain family	DNA-directed RNA polymerase, subunit beta-prime	[K] Transcription		K03046	2.7.7.6
15:000000000-AVD4R:1:1106:9811:17889_1_224_-	0	1	0	0	0	0	0	0	0	0	1	Bacteria	Firmicutes
15:000000000-AVD4R:1:1107:10107:16450_1_227_-	0	0	0	1	0	0	0	0	0	2	1	Bacteria	Firmicutes	Bacilli	Bacillales	Sporolactobacillaceae	Sporolactobacillus	Sporolactobacillus laevolacticus
15:000000000-AVD4R:1:1107:10287:14914_1_288_+	0	0	2	0	0	0	0	0	0	0	0	Bacteria	Bacteroidetes	Bacteroidia	Bacteroidales
15:000000000-AVD4R:1:1107:11621:15707_1_270_+	0	0	0	0	0	0	0	1	0	0	0	Bacteria	Bacteroidetes	Bacteroidia	Bacteroidales						Alpha-glucan phosphorylase	[G] Carbohydrate transport and metabolism
15:000000000-AVD4R:1:1107:11852:6637_1_237_-	0	0	1	0	0	1	1	0	1	1	0	Bacteria	Bacteroidetes	Bacteroidia	Bacteroidales				Internalin-J
15:000000000-AVD4R:1:1107:13964:10383_1_212_+	0	1	0	0	0	0	0	0	0	0	0	Bacteria	Firmicutes	Clostridia	Clostridiales	Clostridiaceae	Clostridium
15:000000000-AVD4R:1:1107:14367:14794_1_275_-	0	0	0	0	0	1	0	0	0	0	0	Bacteria							Fumarate hydratase class I, aerobic (EC 4.2.1.2) (Fumarase A) (Oxaloacetate keto--enol-isomerase) (OAAKE isomerase) (Oxaloacetate tautomerase) (EC 5.3.2.2)	Class-I fumarase family	Iron-dependent fumarate hydratase	[C] Energy production and conversion	tricarboxylic acid cycle	K01676	4.2.1.2
15:000000000-AVD4R:1:1107:14627:9889_1_159_-	2	2	0	1	2	0	0	1	0	3	4	Bacteria	Firmicutes	Clostridia	Clostridiales	Clostridiaceae	Clostridium				Rubredoxin-oxygen oxidoreductase
15:000000000-AVD4R:1:1107:15079:20687_1_259_+	1	1	1	2	0	0	0	0	0	0	0	Bacteria							Glyceraldehyde-3-phosphate dehydrogenase (GAPDH) (EC 1.2.1.12) (NAD-dependent glyceraldehyde-3-phosphate dehydrogenase)	Glyceraldehyde-3-phosphate dehydrogenase family	Glyceraldehyde/Erythrose phosphate dehydrogenase family	[G] Carbohydrate transport and metabolism	glycolysis	K00134	1.2.1.12
15:000000000-AVD4R:1:1107:15223:20493_1_361_-	0	1	0	0	1	0	2	0	1	0	0	Bacteria	Bacteroidetes	Bacteroidia	Bacteroidales				Glutamate dehydrogenase (GDH) (EC 1.4.1.3) (NAD(P)H-utilizing glutamate dehydrogenase)	Glu/Leu/Phe/Val dehydrogenases family	Glutamate dehydrogenase	[E] Amino acid transport and metabolism		K00262	1.4.1.3
15:000000000-AVD4R:1:1107:15421:14389_1_289_+	0	0	0	0	1	0	1	0	0	0	0	Bacteria	Bacteroidetes	Bacteroidia	Bacteroidales
15:000000000-AVD4R:1:1107:15454:21053_1_239_-	0	0	0	0	0	0	0	0	0	0	1	Bacteria	Bacteroidetes	Bacteroidia	Bacteroidales				Thiol protease/hemagglutinin PrtT (EC 3.4.22.-)	Peptidase C10 family	Peptidase C10, streptopain				3.4.22.-
15:000000000-AVD4R:1:1107:15707:4931_1_222_-	1	2	0	0	0	1	1	1	0	0	0	Bacteria	Actinobacteria <phylum>	Actinobacteria	Bifidobacteriales	Bifidobacteriaceae	Bifidobacterium				Phage capsid
15:000000000-AVD4R:1:1107:16008:5692_1_233_-	5	1	0	0	0	0	0	0	0	0	0
15:000000000-AVD4R:1:1107:16211:24177_1_208_-	0	0	0	0	0	1	2	0	1	0	0	Bacteria	Bacteroidetes	Bacteroidia	Bacteroidales	Bacteroidaceae	Bacteroides					[P] Inorganic ion transport and metabolism
15:000000000-AVD4R:1:1107:16352:20405_1_269_-	0	0	0	1	0	0	0	0	0	1	0	Bacteria	Firmicutes						Tyrosine--tRNA ligase (EC 6.1.1.1) (Tyrosyl-tRNA synthetase) (TyrRS)	Class-I aminoacyl-tRNA synthetase family, TyrS type 1 subfamily	Tyrosine-tRNA ligase, bacterial-type, type 1	[J] Translation, ribosomal structure and biogenesis		K01866	6.1.1.1
15:000000000-AVD4R:1:1107:16439:11945_1_209_-	0	2	0	0	0	0	0	0	0	2	1	Bacteria	Firmicutes	Clostridia	Clostridiales
15:000000000-AVD4R:1:1107:16768:3980_1_236_+	1	1	0	0	0	0	0	0	0	1	1	Bacteria	Thermotogae	Thermotogae	Thermotogales	Thermotogaceae	Pseudothermotoga	Pseudothermotoga thermarum	Pyruvate, phosphate dikinase (EC 2.7.9.1) (Pyruvate, orthophosphate dikinase)	PEP-utilizing enzyme family	Pyruvate, phosphate dikinase	[G] Carbohydrate transport and metabolism			2.7.9.1
15:000000000-AVD4R:1:1107:16803:16078_1_215_+	0	0	1	0	0	0	0	1	0	0	0
15:000000000-AVD4R:1:1107:16920:7152_1_318_+	1	2	3	3	2	4	4	2	5	1	1	Bacteria	Bacteroidetes	Bacteroidia	Bacteroidales				30S ribosomal protein S5	Universal ribosomal protein uS5 family	Ribosomal protein S5, bacterial-type	[J] Translation, ribosomal structure and biogenesis		K02988
15:000000000-AVD4R:1:1107:16929:7123_1_275_+	1	1	0	0	0	0	0	0	0	2	0
15:000000000-AVD4R:1:1107:16997:17452_1_244_+	0	0	0	0	0	0	0	1	0	0	0	Bacteria	Bacteroidetes	Bacteroidia	Bacteroidales				Pyruvate-flavodoxin oxidoreductase (EC 1.2.7.-)	NifJ family	Pyruvate-flavodoxin oxidoreductase	[C] Energy production and conversion			1.2.7.-
15:000000000-AVD4R:1:1107:17036:10970_1_335_-	0	1	1	1	1	1	2	0	1	0	0	Bacteria	Bacteroidetes	Bacteroidia	Bacteroidales	Prevotellaceae	Prevotella		50S ribosomal protein L16	Universal ribosomal protein uL16 family	Ribosomal protein L16	[J] Translation, ribosomal structure and biogenesis		K02878
15:000000000-AVD4R:1:1107:17174:14381_1_354_+	1	1	0	0	0	0	0	0	1	0	0
15:000000000-AVD4R:1:1107:17610:18950_1_288_-	0	0	1	3	0	0	0	0	0	0	0	Bacteria	Bacteroidetes	Bacteroidia	Bacteroidales
15:000000000-AVD4R:1:1107:17676:18707_1_252_+	0	0	0	0	0	0	1	0	0	0	0	Bacteria									Transcription regulator AsnC-type
15:000000000-AVD4R:1:1107:17736:8012_1_273_+	0	0	0	0	0	1	1	0	0	0	0	Bacteria	Bacteroidetes	Bacteroidia	Bacteroidales	Prevotellaceae	Prevotella	Prevotella sp. CAG:485			Peptidyl-prolyl cis-trans isomerase, FKBP-type	[O] Posttranslational modification, protein turnover, chaperones
15:000000000-AVD4R:1:1107:17748:17389_1_330_+	0	0	1	1	1	1	2	0	2	1	1	Bacteria	Bacteroidetes	Bacteroidia	Bacteroidales				30S ribosomal protein S16	Bacterial ribosomal protein bS16 family	Ribosomal protein S16	[J] Translation, ribosomal structure and biogenesis		K02959
15:000000000-AVD4R:1:1107:18088:17588_1_237_+	0	0	0	0	1	0	0	0	0	0	0	Bacteria	Firmicutes					Firmicutes bacterium ASF500	UPF0339 protein in ptx operon 5'region (ORF117)	UPF0339 family, Duplicated subfamily
15:000000000-AVD4R:1:1107:18523:19636_1_288_-	0	0	0	0	0	0	0	0	1	0	0	Bacteria	Bacteroidetes	Bacteroidia	Bacteroidales	Bacteroidaceae	Bacteroides
15:000000000-AVD4R:1:1107:18822:13122_1_358_+	1	0	0	0	0	0	0	0	0	0	0	Bacteria	Bacteroidetes	Bacteroidia	Bacteroidales	Prevotellaceae	Prevotella	Prevotella sp. CAG:1092
15:000000000-AVD4R:1:1107:18984:7782_1_253_-	0	1	1	0	0	1	0	0	0	0	0
15:000000000-AVD4R:1:1107:19140:21614_1_294_-	0	1	0	0	0	0	0	0	0	0	0	Bacteria	Firmicutes
15:000000000-AVD4R:1:1107:19803:5063_1_239_-	0	0	1	0	0	1	1	0	0	0	0	Bacteria	Bacteroidetes	Bacteroidia	Bacteroidales	Prevotellaceae			CinA-like protein	CinA family				K03742
15:000000000-AVD4R:1:1107:19906:12894_1_289_-	5	2	0	2	0	0	0	2	0	3	4	Bacteria	Firmicutes						ATP synthase subunit beta (EC 3.6.3.14) (ATP synthase F1 sector subunit beta) (F-ATPase subunit beta)	ATPase alpha/beta chains family	ATPase, F1 complex, beta subunit	[C] Energy production and conversion		K02112	3.6.3.14
15:000000000-AVD4R:1:1107:19915:13883_1_260_+	1	1	0	0	0	0	0	0	0	0	0
15:000000000-AVD4R:1:1107:20251:7587_7_234_-	0	0	0	0	0	0	0	0	0	1	0	Bacteria	Firmicutes	Clostridia	Clostridiales	Eubacteriaceae	Eubacterium				Glucose-1-phosphate adenylyltransferase GlgC, bacterial	[G] Carbohydrate transport and metabolism
15:000000000-AVD4R:1:1107:20382:21110_1_220_-	1	0	0	0	0	0	0	0	0	0	0
15:000000000-AVD4R:1:1107:20557:10407_1_350_-	1	1	1	0	0	0	1	0	1	0	0	Bacteria	Bacteroidetes	Bacteroidia	Bacteroidales				NAD-specific glutamate dehydrogenase (NAD-GDH) (EC 1.4.1.2) (NADH-dependent glutamate dehydrogenase)	Glu/Leu/Phe/Val dehydrogenases family	Glutamate dehydrogenase	[E] Amino acid transport and metabolism		K00262	1.4.1.2
15:000000000-AVD4R:1:1107:20937:1416_1_208_-	0	0	0	0	0	0	0	0	0	1	0	Bacteria	Firmicutes	Clostridia	Clostridiales							[E] Amino acid transport and metabolism
15:000000000-AVD4R:1:1107:21632:5562_1_306_+	0	0	0	0	0	0	0	1	0	0	0	Bacteria	Bacteroidetes	Bacteroidia	Bacteroidales	Prevotellaceae	Paraprevotella
15:000000000-AVD4R:1:1107:22177:17770_1_215_-	1	0	0	0	0	0	0	0	0	0	0	Bacteria	Bacteroidetes	Bacteroidia	Bacteroidales	Tannerellaceae	Parabacteroides
15:000000000-AVD4R:1:1107:22261:24012_1_309_-	2	1	0	0	0	0	0	2	0	1	1	Bacteria	Firmicutes
15:000000000-AVD4R:1:1107:22300:10624_1_312_+	0	0	1	0	0	0	0	1	0	0	0	Bacteria	Bacteroidetes	Bacteroidia	Bacteroidales	Prevotellaceae	Prevotella		Uncharacterized protein Mb1524	Band 7/mec-2 family		[O] Posttranslational modification, protein turnover, chaperones
15:000000000-AVD4R:1:1107:22453:22957_1_232_+	0	0	0	0	0	0	1	0	0	0	0	Bacteria	Bacteroidetes	Bacteroidia	Bacteroidales	Prevotellaceae	Prevotella	Prevotella sp. CAG:873				[M] Cell wall/membrane/envelope biogenesis
15:000000000-AVD4R:1:1107:23027:18983_49_245_-	0	0	0	0	0	1	0	0	1	0	0	Bacteria	Bacteroidetes	Bacteroidia	Bacteroidales				30S ribosomal protein S10	Universal ribosomal protein uS10 family		[J] Translation, ribosomal structure and biogenesis		K02946
15:000000000-AVD4R:1:1107:23061:14015_60_212_-	0	0	0	0	0	0	0	1	0	0	0	Bacteria	Firmicutes	Clostridia	Clostridiales
15:000000000-AVD4R:1:1107:23284:3091_1_264_-	0	0	0	0	0	2	2	0	0	0	0	Bacteria	Bacteroidetes	Bacteroidia	Bacteroidales			Bacteroidales bacterium 52_46
15:000000000-AVD4R:1:1107:24766:5276_1_277_-	0	0	0	1	0	0	0	1	0	0	1	Bacteria	Firmicutes						ATP synthase subunit alpha (EC 3.6.3.14) (ATP synthase F1 sector subunit alpha) (F-ATPase subunit alpha)	ATPase alpha/beta chains family		[C] Energy production and conversion		K02111	3.6.3.14
15:000000000-AVD4R:1:1107:25187:20479_1_225_+	1	1	0	0	0	0	0	0	0	2	2	Bacteria	Firmicutes						Reverse rubrerythrin-2 (revRbr 2) (NADH peroxidase) (NPXase) (Npx) (EC 1.11.1.1) (Rubperoxin 2) (Rpr 2)			[C] Energy production and conversion			1.11.1.1
15:000000000-AVD4R:1:1107:25697:3603_1_351_+	0	0	0	1	0	0	0	0	0	0	0
15:000000000-AVD4R:1:1107:26387:12980_1_327_-	0	0	0	0	0	0	0	1	0	0	0	Bacteria	Firmicutes						Chaperone protein DnaK (HSP70) (Heat shock 70 kDa protein) (Heat shock protein 70)	Heat shock protein 70 family	Heat shock protein 70 family	[O] Posttranslational modification, protein turnover, chaperones
15:000000000-AVD4R:1:1107:26394:16103_48_206_-	0	1	0	0	0	0	0	0	0	1	1	Bacteria	Firmicutes						Uncharacterized zinc-type alcohol dehydrogenase-like protein YphC (EC 1.-.-.-)	Zinc-containing alcohol dehydrogenase family		[C] Energy production and conversion			1.-.-.-
15:000000000-AVD4R:1:1107:26409:15317_1_282_+	0	0	0	0	2	0	0	0	0	0	0
15:000000000-AVD4R:1:1107:27609:19162_1_291_+	1	0	0	0	2	0	0	0	0	0	0	Bacteria	Bacteroidetes	Bacteroidia	Bacteroidales	Prevotellaceae	Paraprevotella		Xylose isomerase (EC 5.3.1.5)	Xylose isomerase family	Xylose isomerase, bacterial-type	[G] Carbohydrate transport and metabolism		K01805	5.3.1.5
15:000000000-AVD4R:1:1107:27765:14787_1_208_-	1	1	1	1	1	1	1	1	1	1	0	Bacteria	Firmicutes	Bacilli	Lactobacillales	Lactobacillaceae	Lactobacillus	Lactobacillus murinus			Peptide/nickel binding protein, MppA-type	[E] Amino acid transport and metabolism
15:000000000-AVD4R:1:1107:29178:15409_1_317_-	0	0	0	1	0	0	0	0	0	0	0	Bacteria	Bacteroidetes	Bacteroidia	Bacteroidales	Prevotellaceae	Prevotella	Prevotella sp. CAG:873
15:000000000-AVD4R:1:1107:4398:6554_1_290_+	0	0	1	1	0	0	0	0	0	0	0	Bacteria	Firmicutes	Clostridia	Clostridiales	Lachnospiraceae	Roseburia					[G] Carbohydrate transport and metabolism
15:000000000-AVD4R:1:1107:4822:10360_1_311_-	0	1	0	0	0	0	0	0	0	0	0	Bacteria	Firmicutes						Cinnamate reductase (EC 1.3.1.-)	NADH:flavin oxidoreductase/NADH oxidase family			L-phenylalanine degradation		1.3.1.-
15:000000000-AVD4R:1:1107:4916:20505_1_289_+	1	1	0	0	0	0	0	0	1	0	0	Bacteria
15:000000000-AVD4R:1:1107:4945:17785_1_241_-	0	0	0	0	0	0	0	1	0	0	0	Bacteria	Firmicutes						Maltodextrin import ATP-binding protein MsmX (EC 3.6.3.-)	ABC transporter superfamily				K10112	3.6.3.-
15:000000000-AVD4R:1:1107:6705:21219_1_361_+	0	0	0	1	0	1	1	0	0	0	0	Bacteria	Bacteroidetes	Bacteroidia	Bacteroidales						Protein-(glutamine-N5) methyltransferase, release factor-specific
15:000000000-AVD4R:1:1107:6733:17243_1_224_-	1	1	1	1	1	1	1	1	2	1	1	Bacteria	Bacteroidetes	Bacteroidia	Bacteroidales				50S ribosomal protein L4	Universal ribosomal protein uL4 family	50S ribosomal protein uL4	[J] Translation, ribosomal structure and biogenesis		K02926
15:000000000-AVD4R:1:1107:7182:12613_1_263_-	1	1	0	1	0	0	0	1	0	1	1	Bacteria	Firmicutes						50S ribosomal protein L22	Universal ribosomal protein uL22 family	Ribosomal protein L22, bacterial/chloroplast-type	[J] Translation, ribosomal structure and biogenesis		K02890
15:000000000-AVD4R:1:1107:7382:6583_1_310_-	0	0	0	0	0	0	0	0	0	0	1	Bacteria	Firmicutes						Putative ribose/galactose/methyl galactoside import ATP-binding protein (EC 3.6.3.17)	ABC transporter superfamily, Carbohydrate importer 2 (CUT2) (TC 3.A.1.2) family				K10441	3.6.3.17
15:000000000-AVD4R:1:1107:8029:8583_1_384_+	0	0	0	0	0	0	0	0	2	0	0	Bacteria	Bacteroidetes	Bacteroidia	Bacteroidales				Pyrophosphate--fructose 6-phosphate 1-phosphotransferase (EC 2.7.1.90) (6-phosphofructokinase, pyrophosphate dependent) (PPi-dependent phosphofructokinase) (PPi-PFK) (Pyrophosphate-dependent 6-phosphofructose-1-kinase)	Phosphofructokinase type A (PFKA) family, PPi-dependent PFK group II subfamily, Clade "Long" sub-subfamily	ATP-dependent 6-phosphofructokinase	[G] Carbohydrate transport and metabolism	glycolysis		2.7.1.90
15:000000000-AVD4R:1:1107:8408:20850_1_253_-	0	0	1	0	0	0	0	0	0	0	0	Bacteria	Bacteroidetes	Bacteroidia	Bacteroidales	Prevotellaceae					Beta-hexosaminidase	[G] Carbohydrate transport and metabolism
15:000000000-AVD4R:1:1107:8691:23404_1_221_+	0	0	0	0	0	1	0	0	0	0	1	Bacteria	Firmicutes	Clostridia	Clostridiales	Oscillospiraceae	Oscillibacter	Oscillibacter valericigenes	Reverse rubrerythrin-1 (revRbr 1) (NADH peroxidase) (NPXase) (Npx) (EC 1.11.1.1) (Rubperoxin 1) (Rpr 1)			[C] Energy production and conversion			1.11.1.1
15:000000000-AVD4R:1:1107:8926:15845_1_278_+	1	1	1	0	0	1	0	0	1	1	0
15:000000000-AVD4R:1:1107:9623:15987_1_231_-	0	0	0	0	1	3	3	1	0	0	0	Bacteria	Bacteroidetes	Bacteroidia	Bacteroidales	Prevotellaceae	Prevotella					[P] Inorganic ion transport and metabolism
15:000000000-AVD4R:1:1107:9764:21512_1_234_+	1	0	0	1	0	0	0	0	1	1	0
15:000000000-AVD4R:1:1107:9809:6759_1_306_-	1	1	1	1	1	1	1	1	2	1	1	Bacteria	Bacteroidetes	Bacteroidia	Bacteroidales				Uronate isomerase (EC 5.3.1.12) (Glucuronate isomerase) (Uronic isomerase)	Metallo-dependent hydrolases superfamily, Uronate isomerase family	Uronate isomerase	[G] Carbohydrate transport and metabolism	pentose and glucuronate interconversion	K01812	5.3.1.12
15:000000000-AVD4R:1:1107:9818:2002_162_315_-	0	0	0	0	0	1	1	1	1	0	0	Bacteria	Firmicutes						30S ribosomal protein S12	Universal ribosomal protein uS12 family	Ribosomal protein S12/S23	[J] Translation, ribosomal structure and biogenesis		K02950
15:000000000-AVD4R:1:1108:10460:13152_1_289_+	0	0	0	0	0	0	0	0	0	0	1
15:000000000-AVD4R:1:1108:10831:17466_1_378_-	0	0	0	0	0	1	0	0	0	0	0	Bacteria	Bacteroidetes	Bacteroidia	Bacteroidales				Methylmalonyl-CoA mutase small subunit (EC 5.4.99.2) (MCM-beta)	Methylmalonyl-CoA mutase family	Methylmalonyl-CoA mutase, beta chain	[I] Lipid transport and metabolism	propanoyl-CoA degradation	K01847	5.4.99.2
15:000000000-AVD4R:1:1108:11126:11000_1_209_-	0	0	0	0	0	0	0	0	2	0	0	Bacteria	Bacteroidetes	Bacteroidia	Bacteroidales	Bacteroidaceae	Bacteroides
15:000000000-AVD4R:1:1108:11710:9308_1_310_-	0	0	1	0	1	0	0	0	0	0	0	Bacteria	Firmicutes						Aldehyde-alcohol dehydrogenase [Includes: Alcohol dehydrogenase (ADH) (EC 1.1.1.1); Acetaldehyde dehydrogenase [acetylating] (ACDH) (EC 1.2.1.10); Pyruvate-formate-lyase deactivase (PFL deactivase)]	Aldehyde dehydrogenase family	Bifunctional aldehyde-alcohol dehydrogenase	[C] Energy production and conversion		K04072	1.1.1.1
15:000000000-AVD4R:1:1108:12962:4496_1_336_-	1	0	0	0	0	0	1	1	0	0	0	Bacteria	Bacteroidetes	Bacteroidia	Bacteroidales			Bacteroidales bacterium 43_36
15:000000000-AVD4R:1:1108:12994:5604_1_289_+	0	0	0	0	0	0	0	0	0	0	1	Bacteria	Firmicutes	Clostridia	Clostridiales				Chaperone protein DnaK (HSP70) (Heat shock 70 kDa protein) (Heat shock protein 70)	Heat shock protein 70 family	Heat shock protein 70 family	[O] Posttranslational modification, protein turnover, chaperones		K04043
15:000000000-AVD4R:1:1108:13358:2613_1_336_+	0	0	0	0	0	1	1	0	0	0	0	Bacteria	Bacteroidetes	Bacteroidia	Bacteroidales	Prevotellaceae	Prevotella	Prevotella sp. CAG:485
15:000000000-AVD4R:1:1108:13487:14273_1_350_-	2	2	0	0	2	1	1	2	2	0	0
15:000000000-AVD4R:1:1108:13505:15402_1_290_-	4	3	4	2	3	3	5	4	0	4	4	Bacteria	Bacteroidetes	Bacteroidia	Bacteroidales	Prevotellaceae	Prevotella
15:000000000-AVD4R:1:1108:13837:3841_1_140_+	1	0	0	0	0	0	0	0	0	0	0	Bacteria							Fumarate reductase flavoprotein subunit (EC 1.3.5.4) (Flavocytochrome c) (FL cyt)	FAD-dependent oxidoreductase 2 family, FRD/SDH subfamily	Flavocytochrome c	[C] Energy production and conversion		K00244	1.3.5.4
15:000000000-AVD4R:1:1108:13959:11522_1_352_+	1	1	1	1	0	0	0	1	0	1	3	Bacteria	Firmicutes						Pyruvate, phosphate dikinase (EC 2.7.9.1) (Pyruvate, orthophosphate dikinase)	PEP-utilizing enzyme family	Pyruvate, phosphate dikinase	[G] Carbohydrate transport and metabolism			2.7.9.1
15:000000000-AVD4R:1:1108:14346:9573_1_369_-	0	0	0	0	0	0	0	0	1	0	0											[O] Posttranslational modification, protein turnover, chaperones
15:000000000-AVD4R:1:1108:14782:14066_1_140_+	0	0	1	0	0	1	1	0	1	0	0	Bacteria	Bacteroidetes	Bacteroidia	Bacteroidales	Prevotellaceae	Prevotella	Prevotella sp. CAG:755				[P] Inorganic ion transport and metabolism
15:000000000-AVD4R:1:1108:14782:5475_1_240_-	0	0	0	0	1	0	0	0	0	0	0	Bacteria	Bacteroidetes	Bacteroidia	Bacteroidales
15:000000000-AVD4R:1:1108:14906:19436_1_276_-	1	0	1	0	1	2	2	1	3	0	0	Bacteria	Bacteroidetes	Bacteroidia	Bacteroidales							[P] Inorganic ion transport and metabolism
15:000000000-AVD4R:1:1108:15209:16372_1_216_+	0	0	0	0	0	0	0	0	1	0	1	Bacteria	Firmicutes	Clostridia	Clostridiales				Chemical-damaging agent resistance protein B	CAPAB/TerDEXZ family		[T] Signal transduction mechanisms
15:000000000-AVD4R:1:1108:15803:3046_1_311_-	0	0	0	0	0	0	0	0	0	1	2	Bacteria	Bacteroidetes	Bacteroidia	Bacteroidales				Phosphoglucomutase (PGM) (EC 5.4.2.2) (Alpha-phosphoglucomutase) (Glucose phosphomutase)	Phosphohexose mutase family		[G] Carbohydrate transport and metabolism	diglucosyl-diacylglycerol biosynthesis	K01835	5.4.2.2
15:000000000-AVD4R:1:1108:15998:20546_1_214_-	0	0	0	0	0	0	1	0	0	0	0	Bacteria	Bacteroidetes	Bacteroidia	Bacteroidales				DNA-directed RNA polymerase subunit beta' (RNAP subunit beta') (EC 2.7.7.6) (RNA polymerase subunit beta') (Transcriptase subunit beta')	RNA polymerase beta' chain family	DNA-directed RNA polymerase, subunit beta-prime	[K] Transcription		K03046	2.7.7.6
15:000000000-AVD4R:1:1108:16313:11634_1_217_+	0	1	0	0	0	0	0	0	0	1	0	Bacteria	Bacteroidetes	Bacteroidia	Bacteroidales	Prevotellaceae	Prevotella
15:000000000-AVD4R:1:1108:18490:21339_1_292_-	0	0	0	0	0	0	1	0	0	0	0	Bacteria	Bacteroidetes
15:000000000-AVD4R:1:1108:18595:6620_1_211_-	0	1	0	0	0	0	0	0	0	2	1
15:000000000-AVD4R:1:1108:18754:13716_1_383_-	1	1	0	0	1	0	1	1	0	1	1	Bacteria	Firmicutes	Clostridia	Clostridiales	Clostridiaceae	Clostridium		3-hydroxybutyryl-CoA dehydrogenase (EC 1.1.1.157) (Beta-hydroxybutyryl-CoA dehydrogenase) (BHBD)	3-hydroxyacyl-CoA dehydrogenase family	3-hydroxyacyl-CoA dehydrogenase		butanoate metabolism	K00074	1.1.1.157
15:000000000-AVD4R:1:1108:18831:24891_106_251_-	2	1	0	0	0	0	0	1	0	1	0	Bacteria	Firmicutes	Clostridia	Clostridiales	Lachnospiraceae
15:000000000-AVD4R:1:1108:18983:12001_1_221_+	0	0	1	0	0	0	0	0	1	0	0	Bacteria	Bacteroidetes	Bacteroidia	Bacteroidales	Bacteroidaceae	Bacteroides	Bacteroides sp. CAG:927	Oxalyl-CoA decarboxylase (EC 4.1.1.8)	TPP enzyme family	Oxalyl-CoA decarboxylase	[E] Amino acid transport and metabolism	oxalate degradation	K01577	4.1.1.8
15:000000000-AVD4R:1:1108:20441:5190_1_216_-	0	1	0	1	0	1	1	0	1	1	0	Bacteria	Bacteroidetes	Bacteroidia	Bacteroidales	Prevotellaceae	Prevotella				Chaperone protein Skp	[M] Cell wall/membrane/envelope biogenesis
15:000000000-AVD4R:1:1108:20942:16886_1_279_+	0	0	0	0	0	0	1	0	0	0	0
15:000000000-AVD4R:1:1108:21233:18311_114_330_-	0	0	0	1	0	0	0	0	0	0	0	Bacteria	Firmicutes	Clostridia	Clostridiales				50S ribosomal protein L7/L12	Bacterial ribosomal protein bL12 family	Ribosomal protein L7/L12	[J] Translation, ribosomal structure and biogenesis		K02935
15:000000000-AVD4R:1:1108:21795:5153_1_234_-	0	0	0	0	0	0	0	0	0	1	0	Bacteria	Bacteroidetes						2-oxoglutarate oxidoreductase subunit KorA (EC 1.2.7.3) (Alpha-ketoglutarate oxidoreductase subunit alpha/gamma) (KG oxidoreductase subunit alpha/gamma) (KGO subunit alpha/gamma) (KOR subunit alpha/gamma)			[C] Energy production and conversion	tricarboxylic acid cycle	K00174	1.2.7.3
15:000000000-AVD4R:1:1108:21919:20894_1_354_+	0	1	0	0	0	0	0	0	0	0	0
15:000000000-AVD4R:1:1108:22084:20480_1_386_+	0	1	0	0	0	0	0	0	0	0	0	Bacteria	Firmicutes	Clostridia	Clostridiales	Lachnospiraceae	Butyrivibrio
15:000000000-AVD4R:1:1108:22438:12527_1_350_-	0	0	1	0	0	0	0	0	0	1	1	Bacteria	Bacteroidetes	Bacteroidia	Bacteroidales						Protein-export membrane protein SecD/SecF, archaeal and bacterial	[U] Intracellular trafficking, secretion, and vesicular transport
15:000000000-AVD4R:1:1108:22487:6406_1_357_-	2	1	2	2	2	1	2	2	2	2	1	Bacteria	Firmicutes	Clostridia	Clostridiales	Oscillospiraceae	Oscillibacter		Flagellin (Fragment)	Bacterial flagellin family	Flagellin
15:000000000-AVD4R:1:1108:22548:16494_1_315_+	0	0	0	0	0	0	0	1	0	0	0	Bacteria	Firmicutes	Clostridia	Clostridiales						Chemotaxis methyl-accepting receptor
15:000000000-AVD4R:1:1108:22585:6839_1_282_-	4	4	3	0	3	2	0	3	1	3	1
15:000000000-AVD4R:1:1108:22679:9620_1_242_+	0	1	0	0	0	0	0	0	0	0	0	Bacteria	Firmicutes						Maltodextrin import ATP-binding protein MsmX (EC 3.6.3.-)	ABC transporter superfamily		[G] Carbohydrate transport and metabolism		K10112	3.6.3.-
15:000000000-AVD4R:1:1108:23824:5595_1_307_+	0	0	1	1	0	2	1	1	0	0	0	Bacteria	Bacteroidetes	Bacteroidia	Bacteroidales				Pyruvate, phosphate dikinase (EC 2.7.9.1) (Pyruvate, orthophosphate dikinase)	PEP-utilizing enzyme family	Pyruvate, phosphate dikinase	[G] Carbohydrate transport and metabolism			2.7.9.1
15:000000000-AVD4R:1:1108:24221:6764_1_240_-	1	1	0	0	0	0	0	0	0	2	0
15:000000000-AVD4R:1:1108:24419:17705_1_296_+	0	1	0	0	0	0	0	0	0	0	0
15:000000000-AVD4R:1:1108:24772:18687_1_219_-	0	0	0	1	0	0	0	0	0	0	0
15:000000000-AVD4R:1:1108:24964:19985_1_243_-	0	2	0	0	0	1	2	1	0	1	0	Bacteria
15:000000000-AVD4R:1:1108:25056:13130_1_260_+	1	1	0	1	0	0	0	0	0	0	1	Bacteria	Firmicutes						Reverse rubrerythrin-1 (revRbr 1) (NADH peroxidase) (NPXase) (Npx) (EC 1.11.1.1) (Rubperoxin 1) (Rpr 1)			[C] Energy production and conversion			1.11.1.1
15:000000000-AVD4R:1:1108:25560:13251_1_320_-	0	0	0	0	0	0	0	0	0	0	1	Bacteria	Bacteroidetes	Bacteroidia	Bacteroidales	Tannerellaceae	Parabacteroides		Xylose isomerase (EC 5.3.1.5)	Xylose isomerase family	Xylose isomerase, bacterial-type	[G] Carbohydrate transport and metabolism		K01805	5.3.1.5
15:000000000-AVD4R:1:1108:25587:16081_1_194_+	0	0	1	0	0	0	0	0	0	0	0	Bacteria	Firmicutes	Clostridia	Clostridiales				50S ribosomal protein L5	Universal ribosomal protein uL5 family	Ribosomal protein L5, bacterial-type	[J] Translation, ribosomal structure and biogenesis		K02931
15:000000000-AVD4R:1:1108:26441:6416_1_372_-	0	0	0	0	0	0	0	0	0	1	0										Phage capsid
15:000000000-AVD4R:1:1108:26654:16876_55_220_-	0	1	1	0	1	1	1	1	1	0	0	Bacteria	Bacteroidetes	Bacteroidia	Bacteroidales				Reverse rubrerythrin-1 (revRbr 1) (NADH peroxidase) (NPXase) (Npx) (EC 1.11.1.1) (Rubperoxin 1) (Rpr 1)			[C] Energy production and conversion			1.11.1.1
15:000000000-AVD4R:1:1108:26751:6625_1_348_-	5	0	0	0	0	0	0	0	0	0	0
15:000000000-AVD4R:1:1108:27132:6284_1_273_+	0	1	1	1	1	0	0	0	0	1	0	Bacteria	Bacteroidetes	Bacteroidia	Bacteroidales							[P] Inorganic ion transport and metabolism
15:000000000-AVD4R:1:1108:27567:19086_129_293_-	0	0	0	0	0	0	0	0	0	0	1	Bacteria	Firmicutes						Reverse rubrerythrin-1 (revRbr 1) (NADH peroxidase) (NPXase) (Npx) (EC 1.11.1.1) (Rubperoxin 1) (Rpr 1)			[C] Energy production and conversion			1.11.1.1
15:000000000-AVD4R:1:1108:3259:11815_1_299_-	0	0	0	0	0	0	0	0	0	1	0	Bacteria	Bacteroidetes
15:000000000-AVD4R:1:1108:3792:9492_1_230_+	1	1	2	1	1	4	3	3	6	2	1	Bacteria							Glyceraldehyde-3-phosphate dehydrogenase (GAPDH) (EC 1.2.1.12) (NAD-dependent glyceraldehyde-3-phosphate dehydrogenase)	Glyceraldehyde-3-phosphate dehydrogenase family	Glyceraldehyde/Erythrose phosphate dehydrogenase family	[G] Carbohydrate transport and metabolism	glycolysis	K00134	1.2.1.12
15:000000000-AVD4R:1:1108:4521:6506_1_276_+	2	1	0	1	0	0	0	1	0	2	2	Bacteria	Firmicutes	Clostridia	Clostridiales	Lachnospiraceae		Lachnospiraceae bacterium A4				[G] Carbohydrate transport and metabolism
15:000000000-AVD4R:1:1108:5234:7757_1_321_-	1	1	1	0	1	0	0	0	1	1	1	Bacteria	Bacteroidetes	Bacteroidia	Bacteroidales	Bacteroidaceae	Bacteroides				Alpha-glucan phosphorylase
15:000000000-AVD4R:1:1108:5954:8925_1_341_+	2	1	0	0	0	0	0	1	0	2	3	Bacteria	Firmicutes									[G] Carbohydrate transport and metabolism
15:000000000-AVD4R:1:1108:6543:12211_1_257_-	0	0	0	0	0	0	0	1	0	1	1	Bacteria	Firmicutes	Clostridia	Clostridiales	Lachnospiraceae						[G] Carbohydrate transport and metabolism
15:000000000-AVD4R:1:1108:7162:14018_1_301_+	0	0	0	0	0	0	0	1	0	0	0	Bacteria							Rubrerythrin (Rr)			[C] Energy production and conversion
15:000000000-AVD4R:1:1108:8797:7881_1_378_+	0	0	0	0	0	0	0	1	0	0	0	Bacteria	Firmicutes	Clostridia	Clostridiales							[C] Energy production and conversion
15:000000000-AVD4R:1:1109:10398:5430_1_382_-	0	0	0	0	0	0	0	0	0	4	4
15:000000000-AVD4R:1:1109:10630:20771_1_230_-	0	0	4	0	0	0	0	0	0	4	5
15:000000000-AVD4R:1:1109:11168:3944_1_329_+	0	0	0	0	0	1	1	0	0	0	0	Bacteria	Bacteroidetes	Bacteroidia	Bacteroidales							[C] Energy production and conversion
15:000000000-AVD4R:1:1109:11238:4112_1_315_-	0	0	0	0	0	0	0	0	0	1	0	Bacteria							Cysteine synthase (CSase) (EC 2.5.1.47) (O-acetylserine (thiol)-lyase) (OAS-TL) (O-acetylserine sulfhydrylase)	Cysteine synthase/cystathionine beta-synthase family	Cysteine synthase CysK	[E] Amino acid transport and metabolism	L-cysteine biosynthesis	K01738	2.5.1.47
15:000000000-AVD4R:1:1109:11950:4305_1_218_+	0	0	0	0	0	0	0	0	0	0	1	Bacteria	Firmicutes	Clostridia	Clostridiales
15:000000000-AVD4R:1:1109:12403:3526_1_350_+	0	0	0	0	0	0	0	0	1	0	0	Bacteria	Firmicutes	Clostridia	Clostridiales	Ruminococcaceae	Ruminococcus	Ruminococcus flavefaciens			Glycoside hydrolase, family 9
15:000000000-AVD4R:1:1109:12799:3648_1_257_-	0	0	2	1	0	0	0	0	1	2	2	Bacteria	Bacteroidetes	Bacteroidia	Bacteroidales							[M] Cell wall/membrane/envelope biogenesis
15:000000000-AVD4R:1:1109:14261:7246_1_289_+	0	1	0	0	0	0	0	0	0	0	0
15:000000000-AVD4R:1:1109:14712:6544_1_332_+	0	0	0	1	0	0	0	1	0	0	1	Bacteria	Firmicutes						Short-chain-enoyl-CoA hydratase (EC 4.2.1.150) (3-hydroxybutyryl-CoA dehydratase) (Crotonase)	Enoyl-CoA hydratase/isomerase family		[I] Lipid transport and metabolism	butanoate metabolism	K01715	4.2.1.150
15:000000000-AVD4R:1:1109:15099:17456_1_352_+	0	0	1	0	0	1	0	0	1	0	0	Bacteria	Bacteroidetes	Bacteroidia	Bacteroidales				Protein LemA	LemA family				K03744
15:000000000-AVD4R:1:1109:15344:4207_1_207_+	0	0	1	0	0	0	0	0	0	0	0	Bacteria	Bacteroidetes	Bacteroidia	Bacteroidales						Glycoside hydrolase, family 13	[G] Carbohydrate transport and metabolism
15:000000000-AVD4R:1:1109:15769:12821_1_303_-	0	0	0	0	0	1	0	0	0	0	0	Bacteria	Bacteroidetes	Bacteroidia	Bacteroidales	Bacteroidaceae	Bacteroides		L-asparaginase 2 (EC 3.5.1.1) (L-asparaginase II) (L-ASNase II) (L-asparagine amidohydrolase II) (Colaspase)	Asparaginase 1 family	Asparaginase/glutaminase	[E] Amino acid transport and metabolism		K01424	3.5.1.1
15:000000000-AVD4R:1:1109:16563:1745_1_257_+	0	0	0	1	0	0	0	0	0	0	0	Bacteria	Firmicutes						1-deoxy-D-xylulose 5-phosphate reductoisomerase (DXP reductoisomerase) (EC 1.1.1.267) (1-deoxyxylulose-5-phosphate reductoisomerase) (2-C-methyl-D-erythritol 4-phosphate synthase)	DXR family	1-deoxy-D-xylulose 5-phosphate reductoisomerase	[I] Lipid transport and metabolism	isopentenyl diphosphate biosynthesis via DXP pathway	K00099	1.1.1.267
15:000000000-AVD4R:1:1109:17089:9309_1_246_-	1	0	0	0	0	0	0	0	0	0	0	Bacteria	Firmicutes						Phosphoglycerate kinase (EC 2.7.2.3)	Phosphoglycerate kinase family	Phosphoglycerate kinase	[G] Carbohydrate transport and metabolism	glycolysis	K00927	2.7.2.3
15:000000000-AVD4R:1:1109:17170:10184_1_312_+	0	0	0	0	0	0	0	0	0	0	2											[G] Carbohydrate transport and metabolism
15:000000000-AVD4R:1:1109:17311:11920_1_256_+	1	1	0	0	0	0	0	0	0	2	2	Bacteria	Firmicutes	Clostridia	Clostridiales				Cellobiose phosphorylase (EC 2.4.1.20)	Glycosyl hydrolase 94 family		[G] Carbohydrate transport and metabolism	cellulose degradation	K00702	2.4.1.20
15:000000000-AVD4R:1:1109:17341:13355_1_207_+	0	0	0	0	0	0	0	0	0	0	1	Bacteria	Bacteroidetes	Bacteroidia	Bacteroidales
15:000000000-AVD4R:1:1109:17674:5794_1_368_+	0	0	0	0	0	1	1	1	0	0	0	Bacteria	Bacteroidetes	Bacteroidia	Bacteroidales				Alkyl hydroperoxide reductase C (EC 1.11.1.15) (Peroxiredoxin) (Thioredoxin peroxidase)	Peroxiredoxin family, AhpC/Prx1 subfamily		[O] Posttranslational modification, protein turnover, chaperones		K03386	1.11.1.15
15:000000000-AVD4R:1:1109:17852:3938_1_266_-	0	0	0	0	0	0	0	0	1	0	0	Bacteria	Bacteroidetes	Bacteroidia	Bacteroidales	Prevotellaceae	Prevotella					[P] Inorganic ion transport and metabolism
15:000000000-AVD4R:1:1109:18382:3221_1_258_+	0	0	0	0	0	0	0	0	1	0	0	Bacteria	Bacteroidetes	Bacteroidia	Bacteroidales	Bacteroidaceae	Bacteroides		Xylose isomerase (EC 5.3.1.5)	Xylose isomerase family	Xylose isomerase, bacterial-type	[G] Carbohydrate transport and metabolism		K01805	5.3.1.5
15:000000000-AVD4R:1:1109:18578:9509_1_335_+	0	0	0	0	0	0	0	1	0	0	0	Bacteria	Firmicutes	Clostridia	Clostridiales				Arabinoxylan arabinofuranohydrolase (AXH) (EC 3.2.1.55) (AXH-m2,3) (AXH-m23) (Alpha-L-arabinofuranosidase) (AF)	Glycosyl hydrolase 43 family			xylan degradation		3.2.1.55
15:000000000-AVD4R:1:1109:18667:21188_1_233_+	0	1	0	0	0	0	0	0	0	0	1	Bacteria	Firmicutes								Bacterial/plant glycogen synthase
15:000000000-AVD4R:1:1109:18802:11206_1_236_+	0	0	0	0	0	0	0	0	0	0	1	Bacteria	Firmicutes
15:000000000-AVD4R:1:1109:18853:6805_1_206_-	0	0	1	0	0	0	1	1	1	0	0	Bacteria	Bacteroidetes	Bacteroidia	Bacteroidales				Pyrophosphate--fructose 6-phosphate 1-phosphotransferase (EC 2.7.1.90) (6-phosphofructokinase, pyrophosphate dependent) (PPi-dependent phosphofructokinase) (PPi-PFK) (Pyrophosphate-dependent 6-phosphofructose-1-kinase)	Phosphofructokinase type A (PFKA) family, PPi-dependent PFK group II subfamily, Clade "Long" sub-subfamily	ATP-dependent 6-phosphofructokinase	[G] Carbohydrate transport and metabolism	glycolysis	K00895	2.7.1.90
15:000000000-AVD4R:1:1109:19258:16578_1_216_+	0	1	0	0	0	0	0	0	0	0	1	Bacteria	Bacteroidetes	Bacteroidia	Bacteroidales				Xylose isomerase (EC 5.3.1.5)	Xylose isomerase family	Xylose isomerase, bacterial-type	[G] Carbohydrate transport and metabolism		K01805	5.3.1.5
15:000000000-AVD4R:1:1109:19271:12779_64_378_+	0	0	1	0	0	2	4	1	0	0	0	Bacteria	Bacteroidetes	Bacteroidia					Pyruvate, phosphate dikinase (EC 2.7.9.1) (Pyruvate, orthophosphate dikinase)	PEP-utilizing enzyme family	Pyruvate, phosphate dikinase			K01006	2.7.9.1
15:000000000-AVD4R:1:1109:21040:18209_1_282_+	1	0	0	0	0	0	0	0	0	0	0	Eukaryota	Chordata	Mammalia	Rodentia	Muridae	Rattus	Rattus norvegicus
15:000000000-AVD4R:1:1109:21053:14578_1_224_+	0	0	0	0	0	0	0	0	0	0	1	Bacteria	Firmicutes	Clostridia	Clostridiales				NADPH-dependent butanol dehydrogenase (BDH) (EC 1.1.1.-)	Iron-containing alcohol dehydrogenase family		[C] Energy production and conversion			1.1.1.-
15:000000000-AVD4R:1:1109:21204:2645_1_220_+	0	0	0	1	0	0	0	0	0	0	0	Bacteria	Firmicutes								Orotate phosphoribosyltransferase	[G] Carbohydrate transport and metabolism
15:000000000-AVD4R:1:1109:21342:15837_1_207_+	1	0	0	0	0	0	0	0	0	0	0	Bacteria	Firmicutes	Clostridia	Clostridiales	Lachnospiraceae
15:000000000-AVD4R:1:1109:22311:10823_1_322_+	0	1	0	0	0	0	0	1	0	0	0	Bacteria	Firmicutes	Clostridia	Clostridiales				Probable 2,3-bisphosphoglycerate-independent phosphoglycerate mutase (BPG-independent PGAM) (Phosphoglyceromutase) (iPGM) (EC 5.4.2.12)	BPG-independent phosphoglycerate mutase family	Phosphoglycerate mutase, 2,3-bisphosphoglycerate-independent	[G] Carbohydrate transport and metabolism	glycolysis	K15633	5.4.2.12
15:000000000-AVD4R:1:1109:22609:10411_1_300_-	0	0	0	0	0	1	1	1	0	0	0	Bacteria	Firmicutes
15:000000000-AVD4R:1:1109:22661:15414_1_301_-	0	0	0	0	0	0	0	0	2	0	0	Bacteria	Bacteroidetes	Bacteroidia	Bacteroidales	Bacteroidaceae	Bacteroides		TonB-dependent receptor SusC (Starch-utilization system protein C)	TonB-dependent receptor family		[P] Inorganic ion transport and metabolism	starch degradation	K21573
15:000000000-AVD4R:1:1109:22684:4937_1_314_+	0	1	0	1	0	0	0	0	0	1	0	Bacteria	Firmicutes	Clostridia	Clostridiales	Ruminococcaceae	Ruminococcus		Pyruvate, phosphate dikinase (EC 2.7.9.1) (Pyruvate, orthophosphate dikinase)	PEP-utilizing enzyme family	Pyruvate, phosphate dikinase	[G] Carbohydrate transport and metabolism			2.7.9.1
15:000000000-AVD4R:1:1109:22850:7756_1_283_+	0	0	0	0	0	0	0	1	0	0	0	Bacteria	Firmicutes	Clostridia	Clostridiales						Flagellin	[N] Cell motility
15:000000000-AVD4R:1:1109:22971:17464_1_257_-	0	1	0	0	0	0	0	0	0	1	0
15:000000000-AVD4R:1:1109:23390:13358_1_377_+	0	0	0	0	0	0	1	0	0	0	0	Bacteria	Bacteroidetes	Bacteroidia	Bacteroidales				FKBP-type peptidyl-prolyl cis-trans isomerase SlyD (PPIase) (EC 5.2.1.8) (Metallochaperone SlyD)	FKBP-type PPIase family	Peptidyl-prolyl cis-trans isomerase, FKBP-type	[O] Posttranslational modification, protein turnover, chaperones		K03775	5.2.1.8
15:000000000-AVD4R:1:1109:23415:4170_25_343_-	0	0	1	1	1	1	1	0	0	0	1	Bacteria	Bacteroidetes	Bacteroidia	Bacteroidales				Outer membrane protein Omp38	OmpA family				K03286
15:000000000-AVD4R:1:1109:23562:11153_126_259_-	0	1	0	1	0	0	0	0	0	1	1	Bacteria	Firmicutes	Clostridia	Clostridiales				Phosphoserine aminotransferase (EC 2.6.1.52) (Phosphohydroxythreonine aminotransferase) (PSAT)	Class-V pyridoxal-phosphate-dependent aminotransferase family, SerC subfamily	Phosphoserine aminotransferase	[E] Amino acid transport and metabolism	L-serine biosynthesis	K00831	2.6.1.52
15:000000000-AVD4R:1:1109:23639:10751_1_233_+	0	0	0	1	0	3	2	0	0	0	0	Bacteria	Bacteroidetes	Bacteroidia	Bacteroidales	Prevotellaceae	Prevotella	Prevotella sp. CAG:873			Biopolymer transport protein ExbD/TolR
15:000000000-AVD4R:1:1109:23661:17586_1_254_+	2	1	0	0	0	0	0	0	0	0	0
15:000000000-AVD4R:1:1109:24019:4514_4_247_-	0	0	0	0	1	0	0	0	0	0	0	Bacteria	Bacteroidetes	Bacteroidia	Bacteroidales				NAD-specific glutamate dehydrogenase (NAD-GDH) (EC 1.4.1.2) (NADH-dependent glutamate dehydrogenase)	Glu/Leu/Phe/Val dehydrogenases family	Glutamate dehydrogenase	[E] Amino acid transport and metabolism		K00262	1.4.1.2
15:000000000-AVD4R:1:1109:24117:8164_1_250_-	1	0	0	1	0	0	0	2	0	2	0	Bacteria							Glutamate dehydrogenase (GDH) (EC 1.4.1.3) (NAD(P)H-utilizing glutamate dehydrogenase)	Glu/Leu/Phe/Val dehydrogenases family	Glutamate dehydrogenase	[E] Amino acid transport and metabolism		K00262	1.4.1.3
15:000000000-AVD4R:1:1109:24261:13635_1_363_+	0	0	0	0	2	0	0	0	0	0	0	Bacteria	Bacteroidetes	Bacteroidia	Bacteroidales
15:000000000-AVD4R:1:1109:25316:10485_1_298_+	0	0	0	0	1	0	0	0	0	0	0	Bacteria	Bacteroidetes	Bacteroidia	Bacteroidales				2-amino-3-ketobutyrate coenzyme A ligase (AKB ligase) (EC 2.3.1.29) (Glycine acetyltransferase)	Class-II pyridoxal-phosphate-dependent aminotransferase family	2-amino-3-ketobutyrate coenzyme A ligase	[H] Coenzyme transport and metabolism	L-threonine degradation via oxydo-reductase pathway	K00639	2.3.1.29
15:000000000-AVD4R:1:1109:25454:10415_16_317_-	1	4	0	1	1	2	1	1	3	2	3	Bacteria	Bacteroidetes	Bacteroidia	Bacteroidales	Prevotellaceae	Prevotella				KDPG/KHG aldolase	[G] Carbohydrate transport and metabolism
15:000000000-AVD4R:1:1109:26421:11598_1_249_+	0	0	0	0	0	0	0	0	0	1	1	Bacteria										[C] Energy production and conversion
15:000000000-AVD4R:1:1109:26606:15159_1_204_-	1	0	1	2	0	0	1	0	0	1	0	Bacteria	Bacteroidetes								Histone H1-like Hc1
15:000000000-AVD4R:1:1109:27022:8248_1_271_+	1	0	0	0	0	0	0	0	0	0	0
15:000000000-AVD4R:1:1109:27113:7435_1_334_-	0	0	0	1	0	0	0	0	1	0	0	Bacteria	Firmicutes	Clostridia	Clostridiales	Ruminococcaceae			Periplasmic beta-glucosidase/beta-xylosidase [Includes: Beta-glucosidase (EC 3.2.1.21) (Cellobiase) (Gentiobiase); Beta-xylosidase (EC 3.2.1.37) (1,4-beta-D-xylan xylohydrolase) (Xylan 1,4-beta-xylosidase)]	Glycosyl hydrolase 3 family	Glycoside hydrolase family 3	[G] Carbohydrate transport and metabolism			3.2.1.21
15:000000000-AVD4R:1:1109:27152:7472_106_234_+	0	0	0	0	0	0	0	1	0	0	0	Bacteria	Firmicutes	Clostridia	Clostridiales				Single-stranded DNA-binding protein 3 (SSB 3)		Single-stranded DNA-binding protein	[L] Replication, recombination and repair		K03111
15:000000000-AVD4R:1:1109:27370:9909_22_356_+	0	0	0	0	0	0	0	1	0	0	0
15:000000000-AVD4R:1:1109:27563:19267_1_229_+	2	0	0	0	2	0	0	0	0	0	0	Bacteria	Firmicutes	Clostridia	Clostridiales
15:000000000-AVD4R:1:1109:27569:10935_1_286_-	0	0	0	0	0	0	0	0	1	0	0	Bacteria	Bacteroidetes	Bacteroidia	Bacteroidales	Porphyromonadaceae	Muribaculum	Muribaculum intestinale
15:000000000-AVD4R:1:1109:28427:14044_1_209_+	1	0	0	0	0	0	0	0	0	0	0	Bacteria	Firmicutes	Clostridia	Clostridiales	Lachnospiraceae	Oribacterium		Altronate oxidoreductase (EC 1.1.1.58) (Tagaturonate dehydrogenase) (Tagaturonate reductase)	Mannitol dehydrogenase family, UxaB subfamily		[G] Carbohydrate transport and metabolism	pentose and glucuronate interconversion	K00041	1.1.1.58
15:000000000-AVD4R:1:1109:3578:6608_1_264_+	5	5	5	4	2	2	3	0	0	0	0
15:000000000-AVD4R:1:1109:3690:13988_1_286_+	0	1	1	0	1	0	0	0	0	0	1	Bacteria	Bacteroidetes	Bacteroidia	Bacteroidales						Chaperone protein Skp	[M] Cell wall/membrane/envelope biogenesis
15:000000000-AVD4R:1:1109:4110:5643_1_275_+	0	0	0	1	0	0	0	0	0	0	0	Bacteria	Bacteroidetes	Bacteroidia	Bacteroidales			Bacteroidales bacterium 52_46
15:000000000-AVD4R:1:1109:5656:15258_1_333_-	1	0	2	0	0	0	0	0	1	0	0
15:000000000-AVD4R:1:1109:6102:15106_1_285_-	2	1	0	0	0	2	1	0	0	3	0	Bacteria	Bacteroidetes	Bacteroidia	Bacteroidales
15:000000000-AVD4R:1:1109:6205:15138_1_356_+	0	0	0	1	0	0	0	0	0	0	0	Bacteria	Bacteroidetes	Bacteroidia	Bacteroidales
15:000000000-AVD4R:1:1109:7446:10320_1_358_+	0	1	0	1	1	0	1	0	0	0	0
15:000000000-AVD4R:1:1109:9263:17362_1_349_+	0	0	0	0	0	0	0	0	0	1	1
15:000000000-AVD4R:1:1109:9264:15498_160_375_+	0	0	0	1	0	0	0	0	0	1	1	Bacteria	Firmicutes	Clostridia	Clostridiales	Lachnospiraceae		Lachnospiraceae bacterium 28-4			S-adenosylmethionine synthetase	[G] Carbohydrate transport and metabolism
15:000000000-AVD4R:1:1109:9807:19221_1_314_+	1	1	0	1	0	0	0	0	0	0	1	Bacteria	Firmicutes	Clostridia	Clostridiales				50S ribosomal protein L14	Universal ribosomal protein uL14 family	Ribosomal protein L14, bacterial-type	[J] Translation, ribosomal structure and biogenesis		K02874
15:000000000-AVD4R:1:1110:11279:14020_1_333_-	0	0	0	0	0	0	0	0	0	0	1	Bacteria	Firmicutes	Clostridia	Clostridiales	Clostridiaceae	Clostridium		Acetyl-CoA acetyltransferase (EC 2.3.1.9) (Acetoacetyl-CoA thiolase) (Beta-ketothiolase)	Thiolase family		[I] Lipid transport and metabolism	poly-(R)-3-hydroxybutanoate biosynthesis	K00626	2.3.1.9
15:000000000-AVD4R:1:1110:12719:11982_1_359_+	0	0	0	0	0	0	0	0	3	0	0	Bacteria	Bacteroidetes	Bacteroidia	Bacteroidales	Bacteroidaceae	Bacteroides	uncultured Bacteroides sp.
15:000000000-AVD4R:1:1110:12881:20240_1_255_+	0	0	0	0	0	0	0	0	1	0	0	Bacteria	Bacteroidetes	Bacteroidia	Bacteroidales							[P] Inorganic ion transport and metabolism
15:000000000-AVD4R:1:1110:13860:17869_1_225_+	0	1	0	0	0	0	0	0	2	0	0	Bacteria	Bacteroidetes	Bacteroidia	Bacteroidales							[P] Inorganic ion transport and metabolism
15:000000000-AVD4R:1:1110:13862:19503_1_264_+	0	2	0	0	0	0	0	0	0	0	1	Bacteria	Firmicutes	Clostridia	Clostridiales							[G] Carbohydrate transport and metabolism
15:000000000-AVD4R:1:1110:14280:6760_1_285_-	5	3	4	5	3	3	4	2	0	0	0	Bacteria	Bacteroidetes	Bacteroidia	Bacteroidales				TonB-dependent receptor SusC (Starch-utilization system protein C)	TonB-dependent receptor family		[P] Inorganic ion transport and metabolism	starch degradation	K21573
15:000000000-AVD4R:1:1110:14674:16648_1_381_+	0	0	0	0	0	0	1	1	0	0	0	Bacteria	Bacteroidetes	Bacteroidia	Bacteroidales	Prevotellaceae	Prevotella	Prevotella sp. CAG:485
15:000000000-AVD4R:1:1110:15023:13911_1_291_-	0	0	0	0	0	0	0	0	1	0	0	Bacteria	Bacteroidetes	Bacteroidia	Bacteroidales
15:000000000-AVD4R:1:1110:15049:16432_1_346_-	1	1	0	0	1	1	1	1	0	0	0	Bacteria	Bacteroidetes	Bacteroidia	Bacteroidales				Malate dehydrogenase (EC 1.1.1.37)	LDH/MDH superfamily, MDH type 3 family		[C] Energy production and conversion		K00024	1.1.1.37
15:000000000-AVD4R:1:1110:15289:14747_1_228_-	0	0	0	0	1	0	0	0	0	0	0
15:000000000-AVD4R:1:1110:15299:14578_1_337_-	0	2	0	0	0	0	0	0	0	0	0
15:000000000-AVD4R:1:1110:15444:12562_1_210_-	0	0	0	0	0	1	0	0	0	0	0
15:000000000-AVD4R:1:1110:15541:17475_1_322_-	1	1	0	1	0	0	0	1	0	1	2	Bacteria	Firmicutes						Multiple sugar-binding periplasmic protein SbpA (Sugar-binding protein A)	Bacterial solute-binding protein 2 family		[G] Carbohydrate transport and metabolism
15:000000000-AVD4R:1:1110:15948:20393_1_317_+	1	0	0	0	0	1	2	1	0	0	0	Bacteria										[P] Inorganic ion transport and metabolism
15:000000000-AVD4R:1:1110:16198:10267_1_368_-	0	0	0	0	0	0	1	1	0	0	0
15:000000000-AVD4R:1:1110:16645:22196_1_313_-	2	3	1	1	1	0	0	0	2	1	1	Bacteria	Bacteroidetes	Bacteroidia	Bacteroidales	Prevotellaceae	Prevotella					[M] Cell wall/membrane/envelope biogenesis
15:000000000-AVD4R:1:1110:16770:11617_1_247_+	0	0	1	0	0	1	2	2	2	0	0	Bacteria	Firmicutes						Corrinoid/iron-sulfur protein small subunit (C/Fe-SP small subunit) (CFeSP small subunit)			[C] Energy production and conversion
15:000000000-AVD4R:1:1110:16967:6338_1_277_+	0	0	0	0	0	0	0	0	1	0	0	Bacteria	Firmicutes						60 kDa chaperonin (GroEL protein) (Protein Cpn60)	Chaperonin (HSP60) family		[O] Posttranslational modification, protein turnover, chaperones		K04077
15:000000000-AVD4R:1:1110:17408:11663_1_217_-	1	0	0	0	0	0	0	0	0	1	1	Bacteria							Acryloyl-CoA reductase electron transfer subunit gamma (Electron transfer flavoprotein small subunit) (ETFSS) (Electron transfer flavoprotein subunit gamma) (Gamma-ETF)	ETF beta-subunit/FixA family	Electron transfer flavoprotein, beta subunit	[C] Energy production and conversion
15:000000000-AVD4R:1:1110:17432:20806_1_248_+	0	1	1	3	0	1	1	0	0	1	2	Bacteria	Firmicutes						Flagellin (Fragment)	Bacterial flagellin family	Flagellin	[N] Cell motility
15:000000000-AVD4R:1:1110:17653:21949_1_214_+	0	0	0	1	0	0	0	0	0	0	0	Bacteria	Firmicutes	Clostridia	Clostridiales	Lachnospiraceae			DNA-binding protein HU (DNA-binding protein II) (HB)	Bacterial histone-like protein family		[L] Replication, recombination and repair
15:000000000-AVD4R:1:1110:17723:9314_1_356_-	4	2	0	1	0	0	0	1	0	0	0	Bacteria									Peptide/nickel binding protein, MppA-type	[E] Amino acid transport and metabolism
15:000000000-AVD4R:1:1110:18082:11544_79_380_-	0	0	0	0	1	0	0	0	0	0	0	Bacteria	Bacteroidetes	Bacteroidia	Bacteroidales	Prevotellaceae	Prevotella
15:000000000-AVD4R:1:1110:18431:19752_1_293_-	4	3	0	1	1	1	1	4	1	6	6	Bacteria	Firmicutes	Clostridia	Clostridiales	Clostridiaceae	Clostridium		Propionyl-CoA carboxylase beta chain (PCCase) (EC 6.4.1.3) (Propanoyl-CoA:carbon dioxide ligase)	AccD/PCCB family		[I] Lipid transport and metabolism	propanoyl-CoA degradation	K01966	6.4.1.3
15:000000000-AVD4R:1:1110:18753:6289_1_296_-	1	1	0	0	0	0	0	1	0	1	0	Bacteria	Firmicutes	Clostridia	Clostridiales	Lachnospiraceae			Acyl-CoA dehydrogenase, short-chain specific (EC 1.3.8.1) (Butyryl-CoA dehydrogenase) (BCAD) (SCAD)	Acyl-CoA dehydrogenase family	P-type ATPase, subfamily IB	[I] Lipid transport and metabolism			1.3.8.1
15:000000000-AVD4R:1:1110:19255:8452_1_319_-	0	0	0	0	1	0	1	0	0	0	0	Bacteria	Bacteroidetes	Bacteroidia	Bacteroidales
15:000000000-AVD4R:1:1110:19615:11637_1_207_+	0	0	0	0	1	0	1	0	0	0	0
15:000000000-AVD4R:1:1110:19711:22397_1_269_+	0	0	0	0	1	0	0	1	0	0	2
15:000000000-AVD4R:1:1110:19850:17135_1_162_-	0	0	0	0	0	0	0	0	0	1	1	Bacteria	Firmicutes								Carbonic anhydrase
15:000000000-AVD4R:1:1110:20620:15787_1_284_+	1	2	1	1	1	1	1	1	1	2	1	Bacteria	Firmicutes						Acryloyl-CoA reductase (NADH) (EC 1.3.1.95) (Propionyl-CoA dehydrogenase)	Acyl-CoA dehydrogenase family		[I] Lipid transport and metabolism		K20143	1.3.1.95
15:000000000-AVD4R:1:1110:20751:4077_1_288_+	0	0	0	0	1	1	1	0	3	0	0	Bacteria	Bacteroidetes	Bacteroidia	Bacteroidales				30S ribosomal protein S3	Universal ribosomal protein uS3 family	Ribosomal protein S3, bacterial	[J] Translation, ribosomal structure and biogenesis		K02982
15:000000000-AVD4R:1:1110:20805:9986_1_264_-	0	0	0	0	0	0	0	0	3	0	0	Bacteria	Bacteroidetes	Bacteroidia	Bacteroidales				Phosphoserine aminotransferase (EC 2.6.1.52) (Phosphohydroxythreonine aminotransferase) (PSAT)	Class-V pyridoxal-phosphate-dependent aminotransferase family, SerC subfamily	Phosphoserine aminotransferase	[E] Amino acid transport and metabolism	L-serine biosynthesis	K00831	2.6.1.52
15:000000000-AVD4R:1:1110:20914:6090_1_275_-	0	0	0	0	0	0	0	0	1	0	0	Bacteria	Bacteroidetes	Bacteroidia	Bacteroidales
15:000000000-AVD4R:1:1110:21243:19577_28_304_-	0	0	0	1	0	0	0	0	1	0	0	Bacteria	Bacteroidetes	Bacteroidia	Bacteroidales				Chaperone protein DnaK (HSP70) (Heat shock 70 kDa protein) (Heat shock protein 70)	Heat shock protein 70 family	Heat shock protein 70 family	[O] Posttranslational modification, protein turnover, chaperones		K04043
15:000000000-AVD4R:1:1110:22090:21898_1_227_+	0	0	0	0	0	0	0	0	0	1	0	Bacteria	Firmicutes	Clostridia	Clostridiales				Pyruvate, phosphate dikinase (EC 2.7.9.1) (Pyruvate, orthophosphate dikinase)	PEP-utilizing enzyme family	Pyruvate, phosphate dikinase	[G] Carbohydrate transport and metabolism			2.7.9.1
15:000000000-AVD4R:1:1110:22327:16815_1_235_+	0	1	0	0	0	0	0	0	0	0	0	Bacteria	Bacteroidetes	Bacteroidia	Bacteroidales
15:000000000-AVD4R:1:1110:2299:13862_1_182_+	0	0	0	0	0	0	0	0	0	1	0
15:000000000-AVD4R:1:1110:23406:7440_1_291_-	0	1	0	0	0	0	0	0	1	0	0	Bacteria	Bacteroidetes	Bacteroidia	Bacteroidales				Pyruvate-flavodoxin oxidoreductase (EC 1.2.7.-)	NifJ family	Pyruvate-flavodoxin oxidoreductase	[C] Energy production and conversion			1.2.7.-
15:000000000-AVD4R:1:1110:24318:10311_1_223_+	0	0	0	0	2	0	0	0	1	0	0
15:000000000-AVD4R:1:1110:25341:4676_1_294_+	1	0	0	0	0	0	0	0	3	0	0	Bacteria	Bacteroidetes	Bacteroidia	Bacteroidales	Prevotellaceae	Prevotella					[P] Inorganic ion transport and metabolism
15:000000000-AVD4R:1:1110:25463:13803_1_253_+	0	0	1	0	0	0	0	0	0	0	0	Bacteria	Bacteroidetes	Bacteroidia	Bacteroidales				Cytosol non-specific dipeptidase (EC 3.4.13.18) (Aminoacyl-histidine dipeptidase) (Beta-alanyl-histidine dipeptidase) (Carnosinase) (Peptidase D) (Xaa-His dipeptidase) (X-His dipeptidase)	Peptidase M20C family		[E] Amino acid transport and metabolism		K01270	3.4.13.18
15:000000000-AVD4R:1:1110:26230:9028_1_209_-	0	0	0	1	0	0	0	0	0	0	0	Bacteria	Bacteroidetes
15:000000000-AVD4R:1:1110:26233:14968_89_296_-	0	0	0	0	1	0	0	0	0	0	0	Bacteria	Bacteroidetes	Bacteroidia	Bacteroidales				Enolase (EC 4.2.1.11) (2-phospho-D-glycerate hydro-lyase) (2-phosphoglycerate dehydratase)	Enolase family	Enolase	[G] Carbohydrate transport and metabolism	glycolysis	K01689	4.2.1.11
15:000000000-AVD4R:1:1110:26918:13714_1_206_+	0	0	0	0	0	0	0	1	0	0	0	Bacteria	Proteobacteria	Deltaproteobacteria	Desulfobacterales	Desulfobacteraceae	Candidatus Magnetomorum		Pyruvate, phosphate dikinase (EC 2.7.9.1) (Pyruvate, orthophosphate dikinase)	PEP-utilizing enzyme family	Pyruvate, phosphate dikinase	[G] Carbohydrate transport and metabolism			2.7.9.1
15:000000000-AVD4R:1:1110:27070:15978_1_281_-	0	1	0	0	0	0	0	0	0	0	0	Bacteria	Firmicutes	Clostridia	Clostridiales						Flagellin	[N] Cell motility
15:000000000-AVD4R:1:1110:27090:14361_1_287_-	0	0	1	1	0	1	0	0	1	0	0	Bacteria	Bacteroidetes	Bacteroidia	Bacteroidales				Malate dehydrogenase (EC 1.1.1.37)	LDH/MDH superfamily, MDH type 3 family	Malate dehydrogenase, type 3	[C] Energy production and conversion		K00024	1.1.1.37
15:000000000-AVD4R:1:1110:27317:16973_1_230_-	0	0	0	0	0	1	1	0	0	0	0	Bacteria	Bacteroidetes	Bacteroidia	Bacteroidales	Prevotellaceae	Prevotella	Prevotella sp. CAG:485	Pyrophosphate--fructose 6-phosphate 1-phosphotransferase (EC 2.7.1.90) (6-phosphofructokinase, pyrophosphate dependent) (PPi-dependent phosphofructokinase) (PPi-PFK) (Pyrophosphate-dependent 6-phosphofructose-1-kinase)	Phosphofructokinase type A (PFKA) family, PPi-dependent PFK group II subfamily, Clade "Long" sub-subfamily	ATP-dependent 6-phosphofructokinase	[G] Carbohydrate transport and metabolism	glycolysis		2.7.1.90
15:000000000-AVD4R:1:1110:27584:15031_1_210_+	4	5	0	0	0	3	2	0	3	6	7
15:000000000-AVD4R:1:1110:27676:11334_1_219_-	0	0	0	0	0	0	0	0	0	0	2	Bacteria	Firmicutes	Clostridia	Clostridiales						Peptide/nickel binding protein, MppA-type	[E] Amino acid transport and metabolism
15:000000000-AVD4R:1:1110:28210:9756_1_272_+	0	0	0	0	0	0	0	0	1	0	0	Bacteria	Bacteroidetes	Bacteroidia	Bacteroidales
15:000000000-AVD4R:1:1110:28270:7087_1_296_-	0	0	0	0	0	0	0	0	2	0	0	Bacteria	Bacteroidetes	Bacteroidia	Bacteroidales	Prevotellaceae	Prevotella	Prevotella sp. CAG:1031	Oxalyl-CoA decarboxylase (EC 4.1.1.8)	TPP enzyme family	Oxalyl-CoA decarboxylase	[E] Amino acid transport and metabolism	oxalate degradation	K01577	4.1.1.8
15:000000000-AVD4R:1:1110:28768:13484_1_205_-	0	1	0	1	0	0	0	0	0	1	2	Bacteria							Arginine deiminase (ADI) (EC 3.5.3.6) (Arginine dihydrolase) (AD)	Arginine deiminase family		[E] Amino acid transport and metabolism	L-arginine degradation via ADI pathway	K01478	3.5.3.6
15:000000000-AVD4R:1:1110:4739:8316_1_210_-	1	0	0	1	1	0	1	1	1	1	0	Bacteria							Putative sensory transducer protein		Chemotaxis methyl-accepting receptor			K03406
15:000000000-AVD4R:1:1110:6355:5141_1_275_-	1	0	0	0	0	0	0	0	0	0	0	Bacteria	Firmicutes	Clostridia	Clostridiales	Ruminococcaceae	Faecalibacterium					[E] Amino acid transport and metabolism
15:000000000-AVD4R:1:1110:6495:9667_1_235_-	0	0	0	0	0	1	0	0	0	0	0	Bacteria	Bacteroidetes	Bacteroidia	Bacteroidales				50S ribosomal protein L18	Universal ribosomal protein uL18 family		[J] Translation, ribosomal structure and biogenesis		K02881
15:000000000-AVD4R:1:1110:6640:11233_1_226_+	0	0	0	0	0	2	2	0	0	0	0	Bacteria	Bacteroidetes	Bacteroidia	Bacteroidales				Urease subunit gamma (EC 3.5.1.5) (Urea amidohydrolase subunit gamma)	Urease gamma subunit family	Urease, gamma subunit	[E] Amino acid transport and metabolism	urea degradation	K01430	3.5.1.5
15:000000000-AVD4R:1:1110:6667:3498_34_328_-	0	0	1	0	0	0	0	0	0	1	0	Bacteria	Bacteroidetes	Bacteroidia	Bacteroidales				DNA-binding protein HU-beta	Bacterial histone-like protein family		[L] Replication, recombination and repair		K03530
15:000000000-AVD4R:1:1110:7746:11180_1_355_+	0	0	0	0	0	0	0	1	0	0	0
15:000000000-AVD4R:1:1110:9223:16511_1_235_+	0	0	1	0	0	0	0	0	0	1	1	Bacteria	Bacteroidetes	Bacteroidia	Bacteroidales	Prevotellaceae	Prevotella	Prevotella sp. CAG:873
15:000000000-AVD4R:1:1110:9344:17124_1_292_-	0	0	1	1	0	0	1	0	2	2	3	Bacteria	Bacteroidetes	Bacteroidia	Bacteroidales	Tannerellaceae	Parabacteroides		Chaperone protein DnaK (HSP70) (Heat shock 70 kDa protein) (Heat shock protein 70)	Heat shock protein 70 family	Heat shock protein 70 family	[O] Posttranslational modification, protein turnover, chaperones		K04043
15:000000000-AVD4R:1:1110:9879:15309_1_265_-	0	0	0	0	0	0	1	0	0	0	0
15:000000000-AVD4R:1:1111:10090:14786_1_377_-	0	0	1	0	0	1	1	0	0	1	0	Bacteria	Bacteroidetes	Bacteroidia	Bacteroidales							[M] Cell wall/membrane/envelope biogenesis
15:000000000-AVD4R:1:1111:10617:9306_1_319_-	4	4	0	2	3	0	0	3	0	3	4	Bacteria	Firmicutes	Clostridia	Clostridiales	Oscillospiraceae	Oscillibacter		Acryloyl-CoA reductase electron transfer subunit gamma (Electron transfer flavoprotein small subunit) (ETFSS) (Electron transfer flavoprotein subunit gamma) (Gamma-ETF)	ETF beta-subunit/FixA family	Electron transfer flavoprotein, beta subunit	[C] Energy production and conversion
15:000000000-AVD4R:1:1111:11193:12998_1_297_-	0	0	0	2	0	0	0	0	0	0	0	Bacteria	Firmicutes	Clostridia	Clostridiales	Lachnospiraceae					Carbohydrate ABC transporter substrate-binding, CPR0540	[G] Carbohydrate transport and metabolism
15:000000000-AVD4R:1:1111:11258:11363_1_287_-	1	2	0	0	1	0	1	0	0	1	1	Bacteria	Bacteroidetes	Bacteroidia	Bacteroidales							[C] Energy production and conversion
15:000000000-AVD4R:1:1111:11440:10855_1_233_-	0	0	0	0	0	0	0	0	0	0	1	Bacteria	Firmicutes	Clostridia	Clostridiales						Glycoside hydrolase family 3	[G] Carbohydrate transport and metabolism
15:000000000-AVD4R:1:1111:11833:15576_1_291_+	2	3	2	0	1	1	1	1	2	1	0
15:000000000-AVD4R:1:1111:11965:13980_1_236_-	0	0	0	3	0	0	0	0	0	0	0	Bacteria	Firmicutes								Chemotaxis methyl-accepting receptor
15:000000000-AVD4R:1:1111:12626:20404_1_366_+	1	1	0	0	0	0	0	0	0	1	0	Bacteria	Firmicutes	Clostridia	Clostridiales				Threonine--tRNA ligase (EC 6.1.1.3) (Threonyl-tRNA synthetase) (ThrRS)	Class-II aminoacyl-tRNA synthetase family	Threonine-tRNA ligase, class IIa	[J] Translation, ribosomal structure and biogenesis		K01868	6.1.1.3
15:000000000-AVD4R:1:1111:12717:21040_1_317_-	1	2	1	1	1	1	1	0	0	1	0	Bacteria	Bacteroidetes	Bacteroidia	Bacteroidales	Porphyromonadaceae
15:000000000-AVD4R:1:1111:13973:6000_1_295_-	2	1	1	1	1	1	1	1	0	3	3
15:000000000-AVD4R:1:1111:14489:10723_1_152_+	0	0	0	1	0	0	0	0	0	0	0
15:000000000-AVD4R:1:1111:15004:10340_1_229_+	1	0	0	0	0	1	1	1	0	1	1	Bacteria	Bacteroidetes	Bacteroidia	Bacteroidales	Prevotellaceae			Motility protein B (Chemotaxis protein MotB)	MotB family		[N] Cell motility		K02557
15:000000000-AVD4R:1:1111:15351:14917_1_315_+	0	0	0	0	1	0	0	0	0	0	0
15:000000000-AVD4R:1:1111:15584:5619_1_286_-	0	0	1	0	0	1	1	0	1	0	0
15:000000000-AVD4R:1:1111:15950:18324_1_214_+	0	0	0	1	0	0	0	0	0	0	0	Bacteria	Firmicutes	Bacilli	Bacillales
15:000000000-AVD4R:1:1111:16467:17617_1_348_+	0	0	0	0	1	1	1	1	0	0	1
15:000000000-AVD4R:1:1111:16892:18346_34_308_+	0	2	0	1	0	1	1	1	0	1	2	Bacteria	Firmicutes	Clostridia	Clostridiales	Lachnospiraceae		Lachnospiraceae bacterium 28-4				[C] Energy production and conversion
15:000000000-AVD4R:1:1111:16919:8788_1_260_+	0	0	0	0	0	1	1	1	0	0	0
15:000000000-AVD4R:1:1111:16969:13787_1_312_-	1	0	0	0	0	0	0	0	0	0	0	Bacteria	Firmicutes	Clostridia	Clostridiales	Oscillospiraceae	Oscillibacter	Oscillibacter sp. 1-3	Putative sensory transducer protein		Chemotaxis methyl-accepting receptor			K03406
15:000000000-AVD4R:1:1111:18499:8196_1_240_+	0	0	0	0	1	0	0	0	0	0	0	Bacteria	Verrucomicrobia	Verrucomicrobiae	Verrucomicrobiales	Akkermansiaceae	Akkermansia	Akkermansia muciniphila	Phosphoenolpyruvate carboxykinase [GTP] (PEP carboxykinase) (PEPCK) (EC 4.1.1.32)	Phosphoenolpyruvate carboxykinase [GTP] family	Phosphoenolpyruvate carboxykinase, GTP-utilising	[C] Energy production and conversion	gluconeogenesis	K01596	4.1.1.32
15:000000000-AVD4R:1:1111:18826:4501_1_373_+	0	0	0	0	0	0	0	0	0	1	0	Bacteria	Bacteroidetes	Bacteroidia	Bacteroidales
15:000000000-AVD4R:1:1111:18836:7356_1_234_-	1	1	1	1	2	1	1	2	0	1	0	Bacteria
15:000000000-AVD4R:1:1111:18958:21964_1_314_-	0	1	0	0	0	0	0	0	3	0	0	Bacteria	Bacteroidetes	Bacteroidia	Bacteroidales						Alpha-L-fucosidase
15:000000000-AVD4R:1:1111:19099:5472_48_310_-	0	0	1	0	0	1	1	1	0	1	0
15:000000000-AVD4R:1:1111:19193:19683_1_281_-	1	1	1	0	1	1	1	3	0	0	0
15:000000000-AVD4R:1:1111:19675:17712_1_318_-	0	0	0	0	0	0	0	1	0	0	0	Bacteria	Firmicutes	Clostridia	Clostridiales						Flagellin	[N] Cell motility
15:000000000-AVD4R:1:1111:19712:18690_1_192_+	0	1	0	0	0	0	0	0	0	1	0
15:000000000-AVD4R:1:1111:19766:13581_1_204_-	1	1	1	1	1	1	1	1	1	1	1	Bacteria	Bacteroidetes	Bacteroidia	Bacteroidales	Bacteroidaceae	Bacteroides	Bacteroides sp. CAG:927	Acyl carrier protein (ACP)	Acyl carrier protein (ACP) family	Acyl carrier protein (ACP)	[I] Lipid transport and metabolism	fatty acid biosynthesis	K02078
15:000000000-AVD4R:1:1111:19827:17513_30_315_-	0	0	0	0	1	0	0	0	0	0	0	Bacteria	Bacteroidetes						Motility protein B (Chemotaxis protein MotB)	MotB family		[N] Cell motility		K02557
15:000000000-AVD4R:1:1111:19872:10392_1_335_-	0	0	0	0	0	0	1	0	0	0	0	Bacteria	Bacteroidetes	Bacteroidia	Bacteroidales	Prevotellaceae	Prevotella	Prevotella sp. CAG:873
15:000000000-AVD4R:1:1111:21174:3191_1_212_-	0	0	0	0	0	0	0	0	0	2	0
15:000000000-AVD4R:1:1111:21269:17266_1_320_-	0	1	0	0	0	0	0	0	0	1	1	Bacteria	Firmicutes	Clostridia	Clostridiales				50S ribosomal protein L5	Universal ribosomal protein uL5 family	Ribosomal protein L5, bacterial-type	[J] Translation, ribosomal structure and biogenesis		K02931
15:000000000-AVD4R:1:1111:21806:20441_1_270_-	0	0	0	0	0	1	3	2	0	0	0	Bacteria	Bacteroidetes	Bacteroidia	Bacteroidales
15:000000000-AVD4R:1:1111:21956:8541_1_386_-	2	2	0	0	1	1	1	2	0	3	3	Bacteria	Firmicutes	Clostridia	Clostridiales				Putative L-ribulose-5-phosphate 4-epimerase UlaF (EC 5.1.3.4) (L-ascorbate utilization protein F) (Phosphoribulose isomerase)	Aldolase class II family, AraD/FucA subfamily		[G] Carbohydrate transport and metabolism	L-ascorbate degradation		5.1.3.4
15:000000000-AVD4R:1:1111:22092:13870_1_207_-	0	2	0	0	4	0	0	0	0	0	0	Bacteria	Firmicutes
15:000000000-AVD4R:1:1111:22520:13388_1_216_+	0	0	0	0	0	0	0	0	1	0	0	Bacteria	Bacteroidetes
15:000000000-AVD4R:1:1111:22948:12085_1_316_+	0	0	0	0	0	0	0	0	0	0	1	Bacteria	Firmicutes	Clostridia	Clostridiales	Oscillospiraceae	Oscillibacter				Phosphoenolpyruvate carboxykinase, ATP-utilising	[C] Energy production and conversion
15:000000000-AVD4R:1:1111:23108:18681_1_288_-	0	1	1	0	1	2	2	1	0	0	1	Bacteria	Firmicutes	Clostridia	Clostridiales	Ruminococcaceae	Ruminococcus	Ruminococcus flavefaciens				[G] Carbohydrate transport and metabolism
15:000000000-AVD4R:1:1111:23895:22303_1_253_+	1	0	1	0	0	1	1	0	1	1	1	Bacteria	Bacteroidetes	Bacteroidia	Bacteroidales	Bacteroidaceae	Bacteroides		Galactokinase (EC 2.7.1.6) (Galactose kinase)	GHMP kinase family, GalK subfamily		[G] Carbohydrate transport and metabolism	galactose metabolism	K00849	2.7.1.6
15:000000000-AVD4R:1:1111:24116:9636_1_301_+	1	2	0	0	0	1	0	1	0	0	0	Bacteria	Actinobacteria <phylum>	Actinobacteria							Phage capsid
15:000000000-AVD4R:1:1111:24138:2570_1_355_-	0	0	0	0	0	0	0	0	1	0	0	Bacteria	Bacteroidetes	Bacteroidia	Bacteroidales	Prevotellaceae	Prevotella		Protein LemA	LemA family				K03744
15:000000000-AVD4R:1:1111:24568:19803_1_309_-	0	0	1	0	0	0	0	0	0	0	0	Bacteria	Bacteroidetes	Bacteroidia	Bacteroidales				50S ribosomal protein L25 (General stress protein CTC)	Bacterial ribosomal protein bL25 family, CTC subfamily	Ribosomal protein L25			K02897
15:000000000-AVD4R:1:1111:24797:20948_1_251_+	0	0	0	0	0	0	0	1	0	0	0	Bacteria	Bacteroidetes	Bacteroidia	Bacteroidales						Peptidase C1B, bleomycin hydrolase	[E] Amino acid transport and metabolism
15:000000000-AVD4R:1:1111:25139:18720_1_266_-	1	2	1	1	2	1	1	1	1	1	0	Bacteria	Bacteroidetes	Bacteroidia	Bacteroidales	Prevotellaceae	Prevotella
15:000000000-AVD4R:1:1111:26217:9742_1_380_-	0	0	0	0	0	0	0	0	0	0	1	Bacteria	Firmicutes	Clostridia	Clostridiales							[G] Carbohydrate transport and metabolism
15:000000000-AVD4R:1:1111:26554:7741_1_309_-	0	0	0	0	1	0	0	0	0	0	0
15:000000000-AVD4R:1:1111:26848:10280_74_312_+	1	0	0	0	0	0	0	0	0	0	2	Bacteria	Firmicutes	Clostridia	Clostridiales				RutC family protein y4sK	RutC family	YjgF/YER057c/UK114 family	[J] Translation, ribosomal structure and biogenesis		K09022
15:000000000-AVD4R:1:1111:26860:8307_1_228_+	1	0	2	2	0	1	1	0	2	0	0	Bacteria	Bacteroidetes	Bacteroidia	Bacteroidales	Prevotellaceae	Prevotella	Prevotella sp. CAG:485
15:000000000-AVD4R:1:1111:27566:18316_1_299_+	1	0	0	0	0	0	0	0	1	0	0	Bacteria							Enolase (EC 4.2.1.11) (2-phospho-D-glycerate hydro-lyase) (2-phosphoglycerate dehydratase)	Enolase family	Enolase	[G] Carbohydrate transport and metabolism	glycolysis	K01689	4.2.1.11
15:000000000-AVD4R:1:1111:28138:12812_1_223_+	1	1	0	1	0	0	0	1	0	3	3	Bacteria	Firmicutes	Clostridia	Clostridiales	Lachnospiraceae		Lachnospiraceae bacterium 28-4	Pyruvate, phosphate dikinase (EC 2.7.9.1) (Pyruvate, orthophosphate dikinase)	PEP-utilizing enzyme family	Pyruvate, phosphate dikinase	[G] Carbohydrate transport and metabolism			2.7.9.1
15:000000000-AVD4R:1:1111:28913:13390_1_357_+	0	0	0	0	0	0	0	0	1	0	0	Bacteria	Bacteroidetes	Bacteroidia
15:000000000-AVD4R:1:1111:29081:15008_1_153_+	1	1	1	1	1	1	1	1	1	1	0	Bacteria	Bacteroidetes	Bacteroidia	Bacteroidales
15:000000000-AVD4R:1:1111:3861:11640_17_323_-	0	0	0	0	1	0	0	0	0	0	0	Bacteria	Bacteroidetes	Bacteroidia	Bacteroidales	Prevotellaceae	Prevotella	Prevotella sp. CAG:485	Thioredoxin (Trx)	Thioredoxin family	Thioredoxin	[O] Posttranslational modification, protein turnover, chaperones
15:000000000-AVD4R:1:1111:4265:6187_1_233_-	0	0	0	0	0	2	2	0	0	0	0	Bacteria							Urease subunit alpha (EC 3.5.1.5) (Urea amidohydrolase subunit alpha)	Metallo-dependent hydrolases superfamily, Urease alpha subunit family	Urease, alpha subunit		urea degradation	K01428	3.5.1.5
15:000000000-AVD4R:1:1111:4289:8501_81_346_+	0	0	0	1	0	0	0	0	0	1	0	Bacteria	Firmicutes	Clostridia	Clostridiales				Formate acetyltransferase (EC 2.3.1.54) (Pyruvate formate-lyase)		Formate acetyltransferase	[C] Energy production and conversion	pyruvate fermentation	K00656	2.3.1.54
15:000000000-AVD4R:1:1111:5145:12079_1_314_+	1	0	0	0	1	0	0	0	0	1	0	Bacteria							Chaperone protein DnaK (HSP70) (Heat shock 70 kDa protein) (Heat shock protein 70)	Heat shock protein 70 family	Heat shock protein 70 family	[O] Posttranslational modification, protein turnover, chaperones		K04043
15:000000000-AVD4R:1:1111:5493:9914_1_300_-	0	0	0	0	0	0	0	0	0	1	1	Bacteria							Putative sensory transducer protein		Chemotaxis methyl-accepting receptor			K03406
15:000000000-AVD4R:1:1111:5851:15567_1_380_+	0	0	0	0	0	0	0	1	0	0	0	Bacteria	Firmicutes	Clostridia	Clostridiales	Clostridiaceae	Clostridium
15:000000000-AVD4R:1:1111:6380:17760_1_336_-	0	0	1	0	0	0	0	0	0	0	0
15:000000000-AVD4R:1:1111:6483:17109_1_369_+	0	0	0	1	0	0	0	1	0	1	1	Bacteria	Firmicutes	Clostridia	Clostridiales				Pyruvate, phosphate dikinase (EC 2.7.9.1) (Pyruvate, orthophosphate dikinase)	PEP-utilizing enzyme family	Pyruvate, phosphate dikinase	[G] Carbohydrate transport and metabolism			2.7.9.1
15:000000000-AVD4R:1:1111:6858:19790_1_291_+	0	0	0	0	0	1	1	0	0	0	0	Bacteria	Bacteroidetes	Bacteroidia	Bacteroidales				Phosphoribosylaminoimidazole-succinocarboxamide synthase (EC 6.3.2.6) (SAICAR synthetase)	SAICAR synthetase family	Phosphoribosylaminoimidazole-succinocarboxamide synthase	[F] Nucleotide transport and metabolism	IMP biosynthesis via de novo pathway	K01923	6.3.2.6
15:000000000-AVD4R:1:1111:7125:18903_1_260_-	1	0	0	0	6	4	3	0	0	0	6	Bacteria	Firmicutes	Clostridia	Clostridiales	Oscillospiraceae	Oscillibacter	Oscillibacter sp. 1-3
15:000000000-AVD4R:1:1111:7819:2358_1_275_+	0	0	0	0	0	0	0	1	0	0	0	Bacteria	Firmicutes						Electron transfer flavoprotein subunit beta (Beta-ETF) (Electron transfer flavoprotein small subunit) (ETFSS)	ETF beta-subunit/FixA family	Electron transfer flavoprotein, beta subunit	[C] Energy production and conversion		K03521
15:000000000-AVD4R:1:1111:7902:14693_1_325_-	0	0	1	0	0	1	1	1	0	1	1
15:000000000-AVD4R:1:1111:8109:6910_1_227_-	0	0	1	1	0	0	0	0	0	0	0	Bacteria	Bacteroidetes	Bacteroidia	Bacteroidales	Prevotellaceae	Prevotella	Prevotella buccalis				[P] Inorganic ion transport and metabolism
15:000000000-AVD4R:1:1111:8280:5300_1_224_+	1	0	0	0	0	0	0	0	0	1	1	Bacteria	Firmicutes								Fagellar hook-basal body protein, FlgE/F/G	[N] Cell motility
15:000000000-AVD4R:1:1111:9353:7841_1_237_+	0	0	0	0	0	2	1	0	0	0	0	Bacteria	Firmicutes	Clostridia	Clostridiales							[E] Amino acid transport and metabolism
15:000000000-AVD4R:1:1111:9436:6908_1_356_+	0	0	0	0	1	0	1	0	1	0	0	Bacteria	Bacteroidetes	Bacteroidia	Bacteroidales						Peptidyl-prolyl cis-trans isomerase, FKBP-type
15:000000000-AVD4R:1:1112:10123:8620_1_283_+	1	1	0	0	0	1	1	0	0	1	1	Bacteria	Firmicutes	Clostridia	Clostridiales	Eubacteriaceae	Eubacterium	Eubacterium sp. CAG:115				[G] Carbohydrate transport and metabolism
15:000000000-AVD4R:1:1112:10529:7609_1_342_-	0	0	1	0	1	0	0	0	0	0	0	Bacteria	Bacteroidetes	Bacteroidia	Bacteroidales	Prevotellaceae	Prevotella	Prevotella sp. CAG:485				[C] Energy production and conversion
15:000000000-AVD4R:1:1112:11233:18469_1_261_-	0	0	0	0	0	0	0	0	0	0	1	Bacteria	Firmicutes						1-deoxy-D-xylulose-5-phosphate synthase 1 (EC 2.2.1.7) (1-deoxyxylulose-5-phosphate synthase 1) (DXP synthase 1) (DXPS 1)	Transketolase family, DXPS subfamily		[G] Carbohydrate transport and metabolism	1-deoxy-D-xylulose 5-phosphate biosynthesis	K01662	2.2.1.7
15:000000000-AVD4R:1:1112:11824:16083_1_267_-	1	0	0	0	0	0	0	0	0	1	1	Bacteria	Firmicutes								ATP-dependent 6-phosphofructokinase	[G] Carbohydrate transport and metabolism
15:000000000-AVD4R:1:1112:12026:14931_1_216_+	0	0	1	0	0	1	2	0	0	0	0	Bacteria	Bacteroidetes	Bacteroidia	Bacteroidales				Chaperone protein DnaK (HSP70) (Heat shock 70 kDa protein) (Heat shock protein 70)	Heat shock protein 70 family	Heat shock protein 70 family	[O] Posttranslational modification, protein turnover, chaperones		K04043
15:000000000-AVD4R:1:1112:12283:4360_1_218_+	0	0	0	0	0	0	0	0	1	0	0	Bacteria	Bacteroidetes	Bacteroidia	Bacteroidales
15:000000000-AVD4R:1:1112:12454:11452_1_335_+	0	0	0	0	0	0	0	0	0	1	1	Bacteria	Proteobacteria	Deltaproteobacteria	Desulfovibrionales	Desulfovibrionaceae			Outer membrane porin F (Root adhesin)	OmpA family		[M] Cell wall/membrane/envelope biogenesis
15:000000000-AVD4R:1:1112:12925:10943_19_324_+	0	0	0	1	0	0	0	0	0	0	0	Bacteria	Firmicutes						50S ribosomal protein L21	Bacterial ribosomal protein bL21 family	Ribosomal protein L21-like	[J] Translation, ribosomal structure and biogenesis		K02888
15:000000000-AVD4R:1:1112:12971:1480_1_240_-	0	0	1	0	0	0	0	0	0	1	0
15:000000000-AVD4R:1:1112:13032:16619_1_294_-	3	1	0	0	0	0	0	0	0	2	2	Bacteria	Firmicutes	Clostridia	Clostridiales							[C] Energy production and conversion
15:000000000-AVD4R:1:1112:14793:12669_1_296_-	1	1	0	0	0	0	0	0	1	1	0
15:000000000-AVD4R:1:1112:14802:1813_1_201_-	0	0	0	1	0	0	0	1	0	0	0	Bacteria	Bacteroidetes	Bacteroidia	Bacteroidales	Prevotellaceae	Prevotella					[U] Intracellular trafficking, secretion, and vesicular transport
15:000000000-AVD4R:1:1112:14870:11573_1_279_-	1	1	0	0	0	0	0	0	0	2	1	Bacteria	Firmicutes									[G] Carbohydrate transport and metabolism
15:000000000-AVD4R:1:1112:15291:15468_1_371_+	0	0	0	0	0	1	1	1	0	0	0	Bacteria	Bacteroidetes	Bacteroidia	Bacteroidales	Prevotellaceae	Prevotella					[P] Inorganic ion transport and metabolism
15:000000000-AVD4R:1:1112:16596:24581_1_315_+	0	0	0	0	0	0	0	0	1	0	0	Bacteria	Bacteroidetes	Bacteroidia	Bacteroidales						Alpha-L-fucosidase
15:000000000-AVD4R:1:1112:17040:11804_1_233_+	1	0	0	0	0	0	0	1	0	0	1	Bacteria	Firmicutes	Clostridia	Clostridiales
15:000000000-AVD4R:1:1112:17130:17031_8_282_-	0	0	0	0	3	0	0	0	0	0	0
15:000000000-AVD4R:1:1112:17320:13404_1_252_+	0	0	0	0	0	0	0	0	0	0	2	Bacteria	Firmicutes					Firmicutes bacterium ASF500				[G] Carbohydrate transport and metabolism
15:000000000-AVD4R:1:1112:17347:11014_1_319_+	0	0	2	2	1	3	2	2	0	0	1	Bacteria	Bacteroidetes						Chaperone protein DnaK (HSP70) (Heat shock 70 kDa protein) (Heat shock protein 70)	Heat shock protein 70 family	Heat shock protein 70 family	[O] Posttranslational modification, protein turnover, chaperones		K04043
15:000000000-AVD4R:1:1112:17446:9237_1_314_+	0	0	0	0	0	0	0	0	0	0	1	Bacteria	Firmicutes	Clostridia	Clostridiales						Chemotaxis methyl-accepting receptor
15:000000000-AVD4R:1:1112:17466:8967_78_327_-	0	0	1	0	0	0	0	0	0	0	0	Bacteria	Firmicutes						50S ribosomal protein L4	Universal ribosomal protein uL4 family	50S ribosomal protein uL4	[J] Translation, ribosomal structure and biogenesis		K02926
15:000000000-AVD4R:1:1112:17566:7760_1_294_+	1	0	0	0	0	0	0	0	0	0	0
15:000000000-AVD4R:1:1112:17595:12535_1_256_+	0	0	0	0	0	0	0	0	0	0	2	Bacteria	Firmicutes	Clostridia	Clostridiales	Ruminococcaceae	Ruminiclostridium				Decaprenyl diphosphate synthase-like
15:000000000-AVD4R:1:1112:17887:2567_1_205_+	0	1	0	0	0	0	0	0	0	0	2											[G] Carbohydrate transport and metabolism
15:000000000-AVD4R:1:1112:18182:5003_1_333_-	0	0	0	0	1	0	0	0	0	0	0
15:000000000-AVD4R:1:1112:18283:16067_1_228_-	0	0	1	0	0	0	1	0	0	0	0	Bacteria	Bacteroidetes	Bacteroidia	Bacteroidales	Bacteroidaceae	Bacteroides
15:000000000-AVD4R:1:1112:18380:24855_1_266_-	0	0	0	0	0	0	0	1	0	0	0	Bacteria	Firmicutes	Clostridia					Flagellin (Fragment)	Bacterial flagellin family	Flagellin
15:000000000-AVD4R:1:1112:19004:23351_1_330_+	1	0	0	0	0	0	0	0	0	1	0
15:000000000-AVD4R:1:1112:19379:12466_1_257_-	0	0	0	0	0	0	0	0	1	0	1	Bacteria	Firmicutes
15:000000000-AVD4R:1:1112:19804:14948_1_349_-	1	1	0	1	2	6	7	3	0	0	0	Bacteria	Bacteroidetes	Bacteroidia	Bacteroidales	Prevotellaceae	Prevotella	Prevotella sp. CAG:485
15:000000000-AVD4R:1:1112:19955:11336_1_255_-	1	1	0	0	0	0	0	0	0	0	0	Bacteria	Firmicutes
15:000000000-AVD4R:1:1112:20672:21702_1_110_+	0	1	0	0	0	0	0	0	0	0	1	Bacteria	Firmicutes	Clostridia	Clostridiales	Eubacteriaceae	Eubacterium
15:000000000-AVD4R:1:1112:21022:8259_1_219_-	0	0	0	0	0	1	0	0	0	0	0	Bacteria	Bacteroidetes	Bacteroidia	Bacteroidales	Prevotellaceae	Prevotella	Prevotella sp. CAG:485				[E] Amino acid transport and metabolism
15:000000000-AVD4R:1:1112:21135:9169_1_289_+	0	0	0	0	0	0	0	0	0	1	0
15:000000000-AVD4R:1:1112:21183:14345_1_374_-	2	2	1	1	0	1	1	2	2	5	3	Bacteria	Firmicutes	Clostridia	Clostridiales				Glyceraldehyde-3-phosphate dehydrogenase (GAPDH) (EC 1.2.1.12) (NAD-dependent glyceraldehyde-3-phosphate dehydrogenase)	Glyceraldehyde-3-phosphate dehydrogenase family	Glyceraldehyde/Erythrose phosphate dehydrogenase family	[G] Carbohydrate transport and metabolism	glycolysis	K00134	1.2.1.12
15:000000000-AVD4R:1:1112:21500:11512_1_381_-	0	0	1	2	2	1	1	1	0	0	0
15:000000000-AVD4R:1:1112:22029:6232_1_288_+	1	1	0	0	0	1	1	1	0	0	0	Bacteria	Bacteroidetes	Bacteroidia	Bacteroidales				Xylose isomerase (EC 5.3.1.5)	Xylose isomerase family	Xylose isomerase, bacterial-type	[G] Carbohydrate transport and metabolism		K01805	5.3.1.5
15:000000000-AVD4R:1:1112:22573:5356_1_223_-	0	5	0	0	2	0	0	0	0	0	0
15:000000000-AVD4R:1:1112:22852:22721_1_362_+	1	0	0	0	0	0	0	0	0	0	0
15:000000000-AVD4R:1:1112:23678:11247_1_332_+	1	0	0	0	0	0	0	1	0	1	1	Bacteria	Firmicutes	Clostridia	Clostridiales	Oscillospiraceae			Triosephosphate isomerase (TIM) (TPI) (EC 5.3.1.1) (Triose-phosphate isomerase)	Triosephosphate isomerase family	Triosephosphate isomerase, bacterial/eukaryotic	[G] Carbohydrate transport and metabolism	gluconeogenesis	K01803	5.3.1.1
15:000000000-AVD4R:1:1112:24112:17175_1_362_+	1	0	0	0	0	0	0	1	0	2	0	Bacteria	Firmicutes						50S ribosomal protein L5	Universal ribosomal protein uL5 family	Ribosomal protein L5, bacterial-type			K02931
15:000000000-AVD4R:1:1112:24567:22067_1_333_+	0	0	0	0	0	0	0	0	0	1	1	Bacteria	Firmicutes						Phosphate butyryltransferase (EC 2.3.1.19) (Phosphotransbutyrylase)	Phosphate acetyltransferase and butyryltransferase family	Phosphate butyryltransferase	[C] Energy production and conversion	butanoate metabolism	K00634	2.3.1.19
15:000000000-AVD4R:1:1112:24899:3244_1_328_+	0	0	0	0	0	0	0	0	0	0	1	Bacteria	Firmicutes	Clostridia	Clostridiales	Oscillospiraceae	Oscillibacter	Oscillibacter sp. 1-3			Chemotaxis methyl-accepting receptor
15:000000000-AVD4R:1:1112:25034:15591_1_278_+	1	0	0	0	0	1	2	1	1	0	0	Bacteria	Bacteroidetes	Bacteroidia	Bacteroidales	Bacteroidaceae	Bacteroides
15:000000000-AVD4R:1:1112:25320:8261_1_251_+	0	0	0	0	0	0	0	0	5	0	0	Bacteria	Bacteroidetes	Bacteroidia	Bacteroidales
15:000000000-AVD4R:1:1112:25436:19193_1_289_+	2	1	1	0	0	0	0	1	0	0	0	Bacteria	Firmicutes	Negativicutes	Acidaminococcales	Acidaminococcaceae	Phascolarctobacterium	Phascolarctobacterium succinatutens	Elongation factor Tu (EF-Tu)	TRAFAC class translation factor GTPase superfamily, Classic translation factor GTPase family, EF-Tu/EF-1A subfamily	Translation elongation factor EFTu/EF1A, bacterial/organelle	[J] Translation, ribosomal structure and biogenesis		K02358
15:000000000-AVD4R:1:1112:25603:15054_1_336_-	0	0	0	0	0	0	0	1	0	0	0
15:000000000-AVD4R:1:1112:25658:4550_1_290_-	1	2	1	1	0	0	0	0	0	0	0	Bacteria	Bacteroidetes	Bacteroidia	Bacteroidales	Prevotellaceae	Prevotella
15:000000000-AVD4R:1:1112:25754:9870_1_225_-	0	0	0	0	0	2	3	0	0	0	0	Bacteria	Actinobacteria	Actinobacteria	Corynebacteriales	Mycobacteriaceae	Mycobacterium	Mycobacterium tuberculosis	Urease subunit beta 2 (EC 3.5.1.5) (Urea amidohydrolase subunit beta 2)	Urease beta subunit family		[E] Amino acid transport and metabolism	urea degradation	K01429	3.5.1.5
15:000000000-AVD4R:1:1112:25812:6184_1_340_+	1	1	0	0	0	0	0	1	0	1	1	Bacteria	Firmicutes	Clostridia	Clostridiales	Lachnospiraceae	Oribacterium		Phosphoglycerate kinase (EC 2.7.2.3)	Phosphoglycerate kinase family	Phosphoglycerate kinase	[G] Carbohydrate transport and metabolism	glycolysis	K00927	2.7.2.3
15:000000000-AVD4R:1:1112:27481:7947_1_386_-	0	0	0	0	0	1	1	0	0	0	0
15:000000000-AVD4R:1:1112:27735:20097_1_250_-	0	0	0	0	1	1	1	1	0	0	0	Bacteria	Bacteroidetes						Starch-binding protein SusD (Starch-utilization system protein D)	SusD family			starch degradation	K21572
15:000000000-AVD4R:1:1112:27908:10475_1_352_-	1	0	0	0	0	0	0	0	0	0	0	Bacteria	Firmicutes					Firmicutes bacterium ASF500
15:000000000-AVD4R:1:1112:28300:11194_1_280_+	0	1	0	0	0	0	0	0	0	1	2	Bacteria	Firmicutes	Clostridia								[E] Amino acid transport and metabolism
15:000000000-AVD4R:1:1112:28710:9214_1_234_+	0	0	0	0	0	0	0	0	0	1	1	Bacteria	Bacteroidetes	Bacteroidia	Bacteroidales				NAD-specific glutamate dehydrogenase (NAD-GDH) (EC 1.4.1.2) (NADH-dependent glutamate dehydrogenase)	Glu/Leu/Phe/Val dehydrogenases family	Glutamate dehydrogenase	[E] Amino acid transport and metabolism		K00262	1.4.1.2
15:000000000-AVD4R:1:1112:6251:7676_265_374_-	0	0	0	0	0	0	0	1	0	0	0	Bacteria	Firmicutes	Clostridia	Clostridiales	Ruminococcaceae	Ruminococcus	Ruminococcus sp. CAG:579
15:000000000-AVD4R:1:1112:6544:5065_1_267_-	0	0	1	0	0	1	0	0	1	0	0
15:000000000-AVD4R:1:1112:7400:16219_1_243_-	0	0	0	0	2	0	0	3	0	0	0	Bacteria	Bacteroidetes	Bacteroidia	Bacteroidales	Porphyromonadaceae	Parabacteroides	Parabacteroides distasonis
15:000000000-AVD4R:1:1112:7402:5210_109_210_+	0	0	0	0	0	0	0	0	1	0	0	Bacteria	Bacteroidetes	Bacteroidia	Bacteroidales	Prevotellaceae	Prevotella	Prevotella sp. CAG:1031	50S ribosomal protein L22	Universal ribosomal protein uL22 family				K02890
15:000000000-AVD4R:1:1112:8091:10693_1_249_+	0	0	0	0	0	0	0	1	0	0	0	Bacteria	Firmicutes	Clostridia	Clostridiales	Clostridiaceae	Clostridium		Periplasmic beta-glucosidase (EC 3.2.1.21) (Beta-D-glucoside glucohydrolase) (Cellobiase) (Gentiobiase)	Glycosyl hydrolase 3 family	Glycoside hydrolase family 3	[G] Carbohydrate transport and metabolism		K05349	3.2.1.21
15:000000000-AVD4R:1:1112:8755:17904_1_210_+	0	1	1	1	0	0	0	0	1	0	0	Bacteria	Bacteroidetes	Bacteroidia	Bacteroidales	Prevotellaceae	Prevotella					[P] Inorganic ion transport and metabolism
15:000000000-AVD4R:1:1112:8894:14408_1_212_-	2	2	2	2	2	2	2	2	0	0	0	Bacteria	Bacteroidetes	Bacteroidia	Bacteroidales							[M] Cell wall/membrane/envelope biogenesis
15:000000000-AVD4R:1:1112:9081:10287_1_273_-	1	1	0	1	1	0	1	0	1	1	0	Bacteria	Bacteroidetes	Bacteroidia	Bacteroidales
15:000000000-AVD4R:1:1112:9591:22732_1_221_-	0	0	0	0	0	0	0	0	1	1	0	Bacteria	Bacteroidetes	Bacteroidia	Bacteroidales				TonB-dependent receptor SusC (Starch-utilization system protein C)	TonB-dependent receptor family			starch degradation	K21573
15:000000000-AVD4R:1:1112:9873:21059_1_297_-	0	0	0	0	0	0	0	0	0	0	1	Bacteria	Firmicutes	Clostridia	Clostridiales		Flavonifractor					[G] Carbohydrate transport and metabolism
15:000000000-AVD4R:1:1112:9967:10056_1_263_+	1	0	0	0	0	0	0	0	0	0	0	Bacteria	Bacteroidetes	Bacteroidia	Bacteroidales	Prevotellaceae	Prevotella				Peptidase C1B, bleomycin hydrolase	[E] Amino acid transport and metabolism
15:000000000-AVD4R:1:1113:10810:16202_1_314_+	0	1	1	0	0	1	0	0	1	0	0	Bacteria	Bacteroidetes	Bacteroidia	Bacteroidales	Prevotellaceae
15:000000000-AVD4R:1:1113:11171:3224_1_254_-	0	0	0	0	0	0	0	0	0	1	0	Bacteria	Firmicutes	Clostridia					Flagellin (Fragment)	Bacterial flagellin family	Flagellin	[N] Cell motility
15:000000000-AVD4R:1:1113:11360:14781_1_296_+	0	0	0	1	1	0	1	1	0	0	0	Bacteria	Bacteroidetes	Bacteroidia	Bacteroidales	Bacteroidaceae	Bacteroides
15:000000000-AVD4R:1:1113:11518:2571_1_211_-	0	0	0	0	1	1	0	0	0	0	0
15:000000000-AVD4R:1:1113:11524:20106_1_341_-	0	0	0	0	0	0	0	0	0	1	1	Bacteria	Firmicutes						Fructose import ATP-binding protein FruK (EC 3.6.3.17)	ABC transporter superfamily		[P] Inorganic ion transport and metabolism		K02056	3.6.3.17
15:000000000-AVD4R:1:1113:11730:11160_1_234_-	0	0	0	0	0	1	1	0	1	0	0	Bacteria	Bacteroidetes	Bacteroidia	Bacteroidales	Prevotellaceae	Prevotella		Pyruvate-flavodoxin oxidoreductase (EC 1.2.7.-)	NifJ family	Pyruvate-flavodoxin oxidoreductase	[C] Energy production and conversion		K03737	1.2.7.-
15:000000000-AVD4R:1:1113:12557:6771_1_212_+	4	0	0	0	0	0	0	0	0	0	0
15:000000000-AVD4R:1:1113:12690:16403_1_280_+	1	0	0	0	0	0	0	0	0	0	0	Bacteria	Firmicutes						Arginine biosynthesis bifunctional protein ArgJ [Cleaved into: Arginine biosynthesis bifunctional protein ArgJ alpha chain; Arginine biosynthesis bifunctional protein ArgJ beta chain] [Includes: Glutamate N-acetyltransferase (EC 2.3.1.35) (Ornithine acetyltransferase) (OATase) (Ornithine transacetylase); Amino-acid acetyltransferase (EC 2.3.1.1) (N-acetylglutamate synthase) (AGSase)]	ArgJ family	Arginine biosynthesis protein ArgJ	[E] Amino acid transport and metabolism	L-arginine biosynthesis	K00620	2.3.1.35
15:000000000-AVD4R:1:1113:13641:11994_1_268_+	0	0	0	2	0	0	0	0	0	0	0
15:000000000-AVD4R:1:1113:13873:10097_74_295_+	0	0	0	0	0	1	2	0	0	0	0	Bacteria	Bacteroidetes	Bacteroidia	Bacteroidales						Ribosomal protein S30Ae/sigma 54 modulation protein
15:000000000-AVD4R:1:1113:14133:11214_1_319_+	1	0	0	0	0	0	0	0	0	0	0											[P] Inorganic ion transport and metabolism
15:000000000-AVD4R:1:1113:14490:14322_1_299_+	0	0	0	0	0	0	0	0	1	0	0	Bacteria										[G] Carbohydrate transport and metabolism
15:000000000-AVD4R:1:1113:14538:16092_1_371_-	0	1	0	1	0	0	0	0	0	0	0	Bacteria	Firmicutes	Clostridia	Clostridiales
15:000000000-AVD4R:1:1113:15303:18315_1_241_+	0	0	0	0	0	0	0	0	0	1	1	Bacteria									Pyruvate-flavodoxin oxidoreductase	[C] Energy production and conversion
15:000000000-AVD4R:1:1113:15984:18715_1_223_-	0	0	0	0	0	0	1	0	0	0	0	Bacteria	Proteobacteria	Betaproteobacteria	Burkholderiales	Sutterellaceae			Isoaspartyl peptidase (EC 3.4.19.5) (Beta-aspartyl-peptidase) (Isoaspartyl dipeptidase) [Cleaved into: Isoaspartyl peptidase subunit alpha; Isoaspartyl peptidase subunit beta]	Ntn-hydrolase family	Peptidase T2, asparaginase 2	[E] Amino acid transport and metabolism		K13051	3.4.19.5
15:000000000-AVD4R:1:1113:17014:14074_1_296_+	1	1	0	2	1	1	5	2	0	1	0	Bacteria	Bacteroidetes	Bacteroidia	Bacteroidales				ATP synthase subunit alpha (EC 3.6.3.14) (ATP synthase F1 sector subunit alpha) (F-ATPase subunit alpha)	ATPase alpha/beta chains family		[C] Energy production and conversion		K02111	3.6.3.14
15:000000000-AVD4R:1:1113:17212:15565_1_249_-	1	0	0	0	0	0	0	0	0	0	0	Bacteria	Bacteroidetes	Bacteroidia	Bacteroidales						Peptidase C1B, bleomycin hydrolase	[E] Amino acid transport and metabolism
15:000000000-AVD4R:1:1113:17461:16531_1_214_+	1	0	0	0	0	0	0	1	0	0	0	Bacteria
15:000000000-AVD4R:1:1113:17715:3559_1_247_+	1	0	0	0	0	0	0	0	0	1	1	Bacteria	Firmicutes	Clostridia	Clostridiales				Pyruvate synthase (EC 1.2.7.1) (Pyruvate-ferredoxin oxidoreductase) (POR)		Pyruvate-flavodoxin oxidoreductase	[C] Energy production and conversion			1.2.7.1
15:000000000-AVD4R:1:1113:18211:8443_1_376_+	0	0	0	0	0	0	0	0	0	0	1	Bacteria	Firmicutes	Clostridia	Clostridiales	Lachnospiraceae			S-adenosylmethionine synthase (AdoMet synthase) (EC 2.5.1.6) (MAT) (Methionine adenosyltransferase)	AdoMet synthase family	S-adenosylmethionine synthetase	[H] Coenzyme transport and metabolism	S-adenosyl-L-methionine biosynthesis	K00789	2.5.1.6
15:000000000-AVD4R:1:1113:18346:10742_1_315_+	0	0	1	1	1	1	1	0	0	0	0	Bacteria	Bacteroidetes	Bacteroidia	Bacteroidales	Bacteroidaceae	Bacteroides	Bacteroides sp. CAG:927	Chaperone protein ClpB	ClpA/ClpB family	Chaperonin ClpB	[O] Posttranslational modification, protein turnover, chaperones		K03695
15:000000000-AVD4R:1:1113:19081:16170_1_291_+	0	0	1	0	0	0	0	0	1	0	0	Bacteria	Bacteroidetes	Bacteroidia	Bacteroidales							[M] Cell wall/membrane/envelope biogenesis
15:000000000-AVD4R:1:1113:20541:18140_1_373_+	0	0	0	0	0	0	2	0	0	0	0
15:000000000-AVD4R:1:1113:20558:3629_1_312_-	2	1	0	1	0	0	1	1	1	2	2	Bacteria							Fructose-bisphosphate aldolase (FBP aldolase) (FBPA) (EC 4.1.2.13) (Fructose-1,6-bisphosphate aldolase)	Class II fructose-bisphosphate aldolase family	Fructose-1,6-bisphosphate aldolase, class 2	[G] Carbohydrate transport and metabolism	glycolysis	K01624	4.1.2.13
15:000000000-AVD4R:1:1113:20581:9600_32_208_+	0	0	0	0	0	0	0	1	0	0	0	Bacteria	Firmicutes	Clostridia	Clostridiales	Clostridiaceae	Clostridium					[G] Carbohydrate transport and metabolism
15:000000000-AVD4R:1:1113:21078:16519_40_265_+	0	0	0	1	0	1	0	0	0	0	0	Bacteria	Firmicutes						50S ribosomal protein L7/L12	Bacterial ribosomal protein bL12 family				K02935
15:000000000-AVD4R:1:1113:21095:6576_1_223_+	0	0	0	0	0	0	0	0	0	1	1	Bacteria	Bacteroidetes	Bacteroidia	Bacteroidales						Glycoside hydrolase, family 13	[G] Carbohydrate transport and metabolism
15:000000000-AVD4R:1:1113:21517:19394_1_363_+	0	1	0	0	0	1	1	1	1	0	0	Bacteria	Bacteroidetes	Bacteroidia	Bacteroidales	Prevotellaceae	Paraprevotella					[M] Cell wall/membrane/envelope biogenesis
15:000000000-AVD4R:1:1113:22573:20491_1_249_-	1	1	0	1	0	1	0	0	1	0	0	Bacteria	Bacteroidetes	Bacteroidia	Bacteroidales				NAD-specific glutamate dehydrogenase (NAD-GDH) (EC 1.4.1.2) (NADH-dependent glutamate dehydrogenase)	Glu/Leu/Phe/Val dehydrogenases family	Glutamate dehydrogenase	[E] Amino acid transport and metabolism		K00262	1.4.1.2
15:000000000-AVD4R:1:1113:22704:12686_1_318_-	1	1	0	0	0	0	0	0	1	1	0	Bacteria	Bacteroidetes	Bacteroidia	Bacteroidales				Pyruvate, phosphate dikinase (EC 2.7.9.1) (Pyruvate, orthophosphate dikinase)	PEP-utilizing enzyme family	Pyruvate, phosphate dikinase	[G] Carbohydrate transport and metabolism			2.7.9.1
15:000000000-AVD4R:1:1113:23124:14684_1_359_-	1	1	1	1	1	1	1	1	1	1	0	Bacteria	Bacteroidetes	Bacteroidia	Bacteroidales				Tryptophanase (EC 4.1.99.1) (L-tryptophan indole-lyase) (TNase)	Beta-eliminating lyase family		[E] Amino acid transport and metabolism	L-tryptophan degradation via pyruvate pathway	K01667	4.1.99.1
15:000000000-AVD4R:1:1113:23506:3310_1_220_+	0	0	0	0	0	0	0	0	1	0	0	Bacteria	Bacteroidetes	Bacteroidia	Bacteroidales	Bacteroidaceae	Bacteroides
15:000000000-AVD4R:1:1113:24017:16087_1_251_+	0	0	0	0	0	0	0	1	0	0	0	Bacteria	Firmicutes	Clostridia	Clostridiales						Chemotaxis methyl-accepting receptor
15:000000000-AVD4R:1:1113:25318:16344_1_316_-	0	2	0	1	0	0	0	1	0	1	1	Bacteria	Firmicutes	Clostridia	Clostridiales				Acryloyl-CoA reductase electron transfer subunit gamma (Electron transfer flavoprotein small subunit) (ETFSS) (Electron transfer flavoprotein subunit gamma) (Gamma-ETF)	ETF beta-subunit/FixA family	Electron transfer flavoprotein, beta subunit
15:000000000-AVD4R:1:1113:25375:12455_1_118_+	0	0	0	0	0	0	0	0	1	0	0
15:000000000-AVD4R:1:1113:25793:22095_1_238_+	0	0	1	1	1	1	1	1	1	1	0	Bacteria									Biopolymer transport protein ExbD/TolR
15:000000000-AVD4R:1:1113:25805:6853_1_288_-	3	3	1	2	2	1	2	2	0	1	0	Bacteria	Firmicutes						Acyl-CoA dehydrogenase (EC 1.3.99.-)	Acyl-CoA dehydrogenase family		[I] Lipid transport and metabolism	fatty acid beta-oxidation		1.3.99.-
15:000000000-AVD4R:1:1113:26282:13683_1_121_+	0	0	0	0	0	0	0	0	0	1	1	Bacteria	Firmicutes	Clostridia	Clostridiales						Ribosomal protein S6, plastid/chloroplast	[J] Translation, ribosomal structure and biogenesis
15:000000000-AVD4R:1:1113:26401:14149_1_248_+	1	1	3	1	2	5	2	2	3	0	2	Bacteria	Bacteroidetes	Bacteroidia	Bacteroidales	Barnesiellaceae	Barnesiella	Barnesiella viscericola				[G] Carbohydrate transport and metabolism
15:000000000-AVD4R:1:1113:26661:20877_1_217_+	0	0	0	0	0	0	0	0	0	0	1
15:000000000-AVD4R:1:1113:27841:9139_35_379_+	1	3	0	0	0	0	0	1	0	1	1	Bacteria	Firmicutes						DNA topoisomerase 1 (EC 5.99.1.2) (DNA topoisomerase I) (Omega-protein) (Relaxing enzyme) (Swivelase) (Untwisting enzyme)	Type IA topoisomerase family	Histone H1-like nucleoprotein HC2			K03168	5.99.1.2
15:000000000-AVD4R:1:1113:28551:9663_1_207_-	0	0	0	0	0	0	0	0	0	1	0	Bacteria	Firmicutes	Clostridia	Clostridiales
15:000000000-AVD4R:1:1113:4404:8667_1_371_+	0	0	0	0	0	0	0	0	1	0	0	Bacteria	Bacteroidetes	Bacteroidia	Bacteroidales				Pyruvate-flavodoxin oxidoreductase (EC 1.2.7.-)	NifJ family	Pyruvate-flavodoxin oxidoreductase	[C] Energy production and conversion			1.2.7.-
15:000000000-AVD4R:1:1113:4863:18349_1_252_+	1	1	0	1	0	0	0	2	0	1	1	Bacteria	Firmicutes	Clostridia	Clostridiales				Acetate kinase (EC 2.7.2.1) (Acetokinase)	Acetokinase family		[C] Energy production and conversion	acetyl-CoA biosynthesis	K00925	2.7.2.1
15:000000000-AVD4R:1:1113:5008:15612_1_314_+	0	0	0	0	0	0	0	0	0	1	0	Bacteria	Bacteroidetes	Bacteroidia	Bacteroidales				Glutaconyl-CoA decarboxylase subunit gamma (EC 4.1.1.70) (Biotin carrier)		Acetyl-CoA biotin carboxyl carrier	[I] Lipid transport and metabolism	L-glutamate degradation via hydroxyglutarate pathway	K01615	4.1.1.70
15:000000000-AVD4R:1:1113:5391:7774_1_219_-	2	2	0	0	0	0	0	0	4	0	0
15:000000000-AVD4R:1:1113:7234:7496_1_269_+	0	0	0	0	0	0	0	0	1	0	0	Bacteria	Bacteroidetes								Succinate CoA transferase	[C] Energy production and conversion
15:000000000-AVD4R:1:1113:7808:5366_1_263_+	0	0	0	0	0	1	0	0	0	0	0	Bacteria							Fumarate hydratase class I, aerobic (EC 4.2.1.2) (Fumarase A) (Oxaloacetate keto--enol-isomerase) (OAAKE isomerase) (Oxaloacetate tautomerase) (EC 5.3.2.2)	Class-I fumarase family	Iron-dependent fumarate hydratase		tricarboxylic acid cycle	K01676	4.2.1.2
15:000000000-AVD4R:1:1113:7869:21251_1_301_-	1	1	1	1	1	0	1	3	1	2	2	Bacteria	Firmicutes	Clostridia	Clostridiales						Phosphoenolpyruvate carboxykinase, ATP-utilising	[C] Energy production and conversion
15:000000000-AVD4R:1:1113:8077:9402_1_366_+	0	0	0	0	2	0	0	0	0	0	0	Bacteria	Bacteroidetes	Bacteroidia	Bacteroidales	Bacteroidaceae	Bacteroides	Bacteroides caecimuris
15:000000000-AVD4R:1:1113:8398:1789_1_207_-	0	0	0	0	0	0	0	0	1	0	0
15:000000000-AVD4R:1:1113:9792:9769_1_337_+	1	0	0	0	0	0	0	0	0	1	0	Bacteria	Firmicutes						Uncharacterized protein in adh 3'region			[C] Energy production and conversion
15:000000000-AVD4R:1:1114:10724:10740_1_237_+	0	0	1	0	0	0	0	0	0	0	0	Bacteria	Bacteroidetes	Bacteroidia	Bacteroidales
15:000000000-AVD4R:1:1114:11033:10321_1_258_-	0	0	0	0	6	0	0	0	0	0	0
15:000000000-AVD4R:1:1114:11354:18430_1_342_+	1	0	0	0	0	0	0	0	0	0	0	Bacteria	Firmicutes	Clostridia	Clostridiales				3-hydroxybutyryl-CoA dehydrogenase (EC 1.1.1.157) (Beta-hydroxybutyryl-CoA dehydrogenase) (BHBD)	3-hydroxyacyl-CoA dehydrogenase family	3-hydroxyacyl-CoA dehydrogenase	[I] Lipid transport and metabolism	butanoate metabolism		1.1.1.157
15:000000000-AVD4R:1:1114:12307:17734_1_205_-	0	0	0	0	0	0	0	0	0	1	1	Bacteria	Bacteroidetes	Bacteroidia	Bacteroidales				50S ribosomal protein L10	Universal ribosomal protein uL10 family		[J] Translation, ribosomal structure and biogenesis		K02864
15:000000000-AVD4R:1:1114:12492:21846_1_211_-	0	0	0	0	0	0	1	0	0	0	0	Bacteria	Bacteroidetes	Bacteroidia	Bacteroidales
15:000000000-AVD4R:1:1114:12806:4721_1_367_+	1	0	1	0	0	0	0	0	0	0	0	Bacteria	Bacteroidetes	Bacteroidia	Bacteroidales	Prevotellaceae						[O] Posttranslational modification, protein turnover, chaperones
15:000000000-AVD4R:1:1114:12869:15341_1_240_-	0	0	1	0	0	0	0	0	0	0	1	Bacteria	Bacteroidetes	Bacteroidia	Bacteroidales						Glycoside hydrolase, family 13	[G] Carbohydrate transport and metabolism
15:000000000-AVD4R:1:1114:13076:17198_1_274_+	0	1	3	2	3	4	3	3	3	2	4	Bacteria	Firmicutes
15:000000000-AVD4R:1:1114:13294:19242_1_353_+	0	0	0	0	0	0	0	1	0	0	0	Bacteria	Firmicutes						Formate--tetrahydrofolate ligase (EC 6.3.4.3) (Formyltetrahydrofolate synthetase) (FHS) (FTHFS)	Formate--tetrahydrofolate ligase family	Formate-tetrahydrofolate ligase, FTHFS		tetrahydrofolate interconversion	K01938	6.3.4.3
15:000000000-AVD4R:1:1114:13806:13292_1_269_-	0	2	2	3	0	2	2	0	0	0	2
15:000000000-AVD4R:1:1114:14708:19427_1_301_+	0	1	0	0	0	0	0	0	0	1	1	Bacteria	Firmicutes	Clostridia	Clostridiales	Clostridiaceae	Butyricicoccus		Acetyl-CoA acetyltransferase (EC 2.3.1.9) (Acetoacetyl-CoA thiolase)	Thiolase family		[I] Lipid transport and metabolism	(R)-mevalonate biosynthesis	K00626	2.3.1.9
15:000000000-AVD4R:1:1114:14709:15890_1_385_+	0	1	0	1	0	0	0	0	0	0	0	Bacteria	Firmicutes						Elongation factor Tu (EF-Tu)	TRAFAC class translation factor GTPase superfamily, Classic translation factor GTPase family, EF-Tu/EF-1A subfamily	Translation elongation factor EFTu/EF1A, bacterial/organelle	[J] Translation, ribosomal structure and biogenesis		K02358
15:000000000-AVD4R:1:1114:14737:4225_1_170_-	0	0	0	1	0	0	0	0	0	1	0	Bacteria	Firmicutes	Clostridia	Clostridiales	Oscillospiraceae	Oscillibacter	Oscillibacter sp. 1-3
15:000000000-AVD4R:1:1114:14824:4458_1_237_-	0	0	0	0	1	0	0	0	0	0	0	Bacteria							30S ribosomal protein S16	Bacterial ribosomal protein bS16 family	Ribosomal protein S16	[J] Translation, ribosomal structure and biogenesis		K02959
15:000000000-AVD4R:1:1114:15146:18478_1_349_+	0	0	0	0	0	0	0	0	1	2	2
15:000000000-AVD4R:1:1114:15451:8598_1_338_-	1	1	1	0	1	1	1	1	0	1	0	Bacteria	Bacteroidetes						Elongation factor Tu (EF-Tu)	TRAFAC class translation factor GTPase superfamily, Classic translation factor GTPase family, EF-Tu/EF-1A subfamily	Translation elongation factor EFTu/EF1A, bacterial/organelle	[J] Translation, ribosomal structure and biogenesis		K02358
15:000000000-AVD4R:1:1114:15481:17092_1_300_-	2	3	2	2	3	1	2	2	2	2	4	Bacteria	Firmicutes						Pyruvate, phosphate dikinase (EC 2.7.9.1) (Pyruvate, orthophosphate dikinase)	PEP-utilizing enzyme family	Pyruvate, phosphate dikinase	[G] Carbohydrate transport and metabolism			2.7.9.1
15:000000000-AVD4R:1:1114:15686:10897_1_271_-	0	1	0	1	0	0	0	0	0	1	0	Bacteria	Firmicutes
15:000000000-AVD4R:1:1114:15988:14549_1_323_-	0	0	0	0	0	0	0	0	1	0	0	Bacteria							Urease subunit alpha (EC 3.5.1.5) (Urea amidohydrolase subunit alpha)	Metallo-dependent hydrolases superfamily, Urease alpha subunit family	Urease, alpha subunit	[E] Amino acid transport and metabolism	urea degradation	K01428	3.5.1.5
15:000000000-AVD4R:1:1114:16578:16731_1_250_+	0	0	0	0	0	0	0	1	0	0	0	Bacteria	Firmicutes						Elongation factor Ts (EF-Ts)	EF-Ts family	Translation elongation factor EFTs/EF1B	[J] Translation, ribosomal structure and biogenesis		K02357
15:000000000-AVD4R:1:1114:16927:17392_1_226_+	0	0	1	0	0	0	0	0	0	0	0	Bacteria	Bacteroidetes	Bacteroidia	Bacteroidales						Glycoside hydrolase, family 2	[G] Carbohydrate transport and metabolism
15:000000000-AVD4R:1:1114:17038:14084_1_241_-	0	0	0	0	1	0	0	0	1	0	0	Bacteria	Bacteroidetes	Bacteroidia	Bacteroidales			Bacteroidales bacterium 52_46	Glucose-6-phosphate isomerase (GPI) (EC 5.3.1.9) (Phosphoglucose isomerase) (PGI) (Phosphohexose isomerase) (PHI)	GPI family	Phosphoglucose isomerase (PGI)	[G] Carbohydrate transport and metabolism	gluconeogenesis	K01810	5.3.1.9
15:000000000-AVD4R:1:1114:17069:17496_1_333_-	1	1	1	1	2	0	0	0	0	0	0	Bacteria	Bacteroidetes	Bacteroidia	Bacteroidales	Bacteroidaceae	Bacteroides
15:000000000-AVD4R:1:1114:17210:6997_1_320_+	0	1	1	2	0	0	0	0	1	1	2	Bacteria	Bacteroidetes	Bacteroidia	Bacteroidales				TonB-dependent receptor SusC (Starch-utilization system protein C)	TonB-dependent receptor family		[P] Inorganic ion transport and metabolism	starch degradation	K21573
15:000000000-AVD4R:1:1114:17376:3880_1_289_+	0	1	0	0	0	0	0	0	0	0	0	Bacteria	Bacteroidetes	Bacteroidia	Bacteroidales	Prevotellaceae	Prevotella	Prevotella sp. CAG:1031	Glycine cleavage system H protein	GcvH family		[E] Amino acid transport and metabolism		K02437
15:000000000-AVD4R:1:1114:18012:10352_1_227_+	0	0	0	0	0	0	0	0	0	1	1	Bacteria	Firmicutes					Firmicutes bacterium CAG:882
15:000000000-AVD4R:1:1114:18163:14899_1_277_-	1	1	0	0	0	0	0	0	0	1	1	Bacteria	Firmicutes	Clostridia	Clostridiales				Butyrate kinase (BK) (EC 2.7.2.7)	Acetokinase family	Butyrate kinase		butanoate metabolism	K00929	2.7.2.7
15:000000000-AVD4R:1:1114:18248:1242_1_214_+	0	1	0	0	0	0	0	1	0	0	0
15:000000000-AVD4R:1:1114:18578:16598_1_184_+	0	0	0	1	0	0	0	0	0	1	1	Bacteria	Firmicutes	Clostridia	Clostridiales	Lachnospiraceae			Multiphosphoryl transfer protein 1 (MTP 1) (Triphosphoryl transfer protein 1) (TTP 1) [Includes: Phosphoenolpyruvate-protein phosphotransferase (EC 2.7.3.9) (Phosphotransferase system enzyme I); Phosphocarrier protein HPr (Protein H); PTS system fructose-like EIIA component (EC 2.7.1.202) (Fructose-like phosphotransferase enzyme IIA component)]	PEP-utilizing enzyme family	Phosphotransferase system, enzyme I	[G] Carbohydrate transport and metabolism		K08483	2.7.3.9
15:000000000-AVD4R:1:1114:18949:6249_1_208_-	1	1	0	0	0	0	0	0	0	0	0	Bacteria	Bacteroidetes	Bacteroidia	Bacteroidales			Bacteroidales bacterium 43_36
15:000000000-AVD4R:1:1114:18957:13210_1_355_-	0	0	0	0	1	0	0	0	1	0	0	Bacteria	Bacteroidetes	Bacteroidia	Bacteroidales			Bacteroidales bacterium 52_46	Alanine--tRNA ligase (EC 6.1.1.7) (Alanyl-tRNA synthetase) (AlaRS)	Class-II aminoacyl-tRNA synthetase family	Alanine-tRNA ligase, eukaryota/bacteria	[J] Translation, ribosomal structure and biogenesis		K01872	6.1.1.7
15:000000000-AVD4R:1:1114:19043:11583_102_262_-	1	1	0	0	1	1	0	1	0	1	1	Bacteria	Firmicutes	Clostridia	Clostridiales	Oscillospiraceae	Oscillibacter	Oscillibacter sp. 1-3				[G] Carbohydrate transport and metabolism
15:000000000-AVD4R:1:1114:19079:21545_26_313_+	0	0	0	0	0	0	0	0	0	1	0	Bacteria	Firmicutes	Bacilli	Lactobacillales	Lactobacillaceae	Lactobacillus		Glutamine--fructose-6-phosphate aminotransferase [isomerizing] (EC 2.6.1.16) (D-fructose-6-phosphate amidotransferase) (GFAT) (Glucosamine-6-phosphate synthase) (Hexosephosphate aminotransferase) (L-glutamine--D-fructose-6-phosphate amidotransferase)		Glucosamine-fructose-6-phosphate aminotransferase, isomerising	[M] Cell wall/membrane/envelope biogenesis		K00820	2.6.1.16
15:000000000-AVD4R:1:1114:19452:6752_1_250_-	0	1	0	0	0	0	0	0	0	1	0	Bacteria	Firmicutes	Clostridia	Clostridiales	Oscillospiraceae			Triosephosphate isomerase (TIM) (TPI) (EC 5.3.1.1) (Triose-phosphate isomerase)	Triosephosphate isomerase family	Triosephosphate isomerase, bacterial/eukaryotic	[G] Carbohydrate transport and metabolism	gluconeogenesis	K01803	5.3.1.1
15:000000000-AVD4R:1:1114:19498:10194_1_241_+	0	0	0	0	0	1	0	0	0	2	2	Bacteria							Glyceraldehyde-3-phosphate dehydrogenase (GAPDH) (EC 1.2.1.12) (NAD-dependent glyceraldehyde-3-phosphate dehydrogenase)	Glyceraldehyde-3-phosphate dehydrogenase family	Glyceraldehyde/Erythrose phosphate dehydrogenase family	[G] Carbohydrate transport and metabolism	glycolysis	K00134	1.2.1.12
15:000000000-AVD4R:1:1114:20004:1665_1_209_-	1	0	1	1	1	1	0	0	0	1	1	Bacteria	Firmicutes						Pyruvate, phosphate dikinase (EC 2.7.9.1) (Pyruvate, orthophosphate dikinase)	PEP-utilizing enzyme family	Pyruvate, phosphate dikinase	[G] Carbohydrate transport and metabolism			2.7.9.1
15:000000000-AVD4R:1:1114:20166:7929_1_206_-	0	1	0	0	0	0	0	0	0	0	0	Bacteria	Firmicutes									[G] Carbohydrate transport and metabolism
15:000000000-AVD4R:1:1114:20640:3638_1_277_+	0	0	0	0	0	1	1	0	0	0	0
15:000000000-AVD4R:1:1114:21109:10190_1_247_-	0	0	0	0	0	0	0	0	1	1	1	Bacteria	Bacteroidetes	Bacteroidia	Bacteroidales				NAD-specific glutamate dehydrogenase (NAD-GDH) (EC 1.4.1.2) (NADH-dependent glutamate dehydrogenase)	Glu/Leu/Phe/Val dehydrogenases family	Glutamate dehydrogenase	[E] Amino acid transport and metabolism		K00262	1.4.1.2
15:000000000-AVD4R:1:1114:21171:15040_1_272_-	0	0	0	0	0	0	0	2	0	0	0	Bacteria	Firmicutes	Clostridia	Clostridiales	Ruminococcaceae	Ruminococcus	Ruminococcus albus				[G] Carbohydrate transport and metabolism
15:000000000-AVD4R:1:1114:21694:14368_1_342_+	0	1	0	0	0	0	0	0	0	0	0
15:000000000-AVD4R:1:1114:21834:18782_1_207_-	0	0	0	0	0	0	0	0	0	1	3	Bacteria	Firmicutes	Clostridia	Clostridiales	Ruminococcaceae	Ruminococcus	Ruminococcus albus
15:000000000-AVD4R:1:1114:23268:13640_1_321_-	0	0	0	0	1	0	0	0	0	0	0	Bacteria	Bacteroidetes	Bacteroidia	Bacteroidales	Rikenellaceae	Alistipes
15:000000000-AVD4R:1:1114:23268:4477_1_247_+	1	0	0	0	0	0	0	0	0	0	0	Bacteria	Firmicutes								Glycoside hydrolase family 3	[G] Carbohydrate transport and metabolism
15:000000000-AVD4R:1:1114:23436:15952_1_276_-	0	0	0	0	0	0	0	1	0	0	0	Bacteria	Bacteroidetes	Bacteroidia							Cobyric acid synthase CobQ
15:000000000-AVD4R:1:1114:23559:8483_1_283_-	1	0	0	0	0	1	1	1	1	0	0	Bacteria	Bacteroidetes	Bacteroidia	Bacteroidales	Bacteroidaceae	Bacteroides
15:000000000-AVD4R:1:1114:24744:18709_1_239_+	0	0	0	0	0	0	0	0	1	0	0	Bacteria							Alpha-amylase (EC 3.2.1.1) (1,4-alpha-D-glucan glucanohydrolase)	Glycosyl hydrolase 13 family	Glycoside hydrolase, family 13				3.2.1.1
15:000000000-AVD4R:1:1114:24828:8241_1_325_+	0	0	1	0	0	0	0	0	0	0	0	Bacteria	Bacteroidetes	Bacteroidia	Bacteroidales	Bacteroidaceae	Bacteroides	Bacteroides sp. CAG:927				[M] Cell wall/membrane/envelope biogenesis
15:000000000-AVD4R:1:1114:25244:15842_1_359_+	3	3	2	1	1	2	2	1	1	3	2
15:000000000-AVD4R:1:1114:25926:4094_1_282_+	3	1	3	1	3	2	3	0	1	2	4	Bacteria	Bacteroidetes	Bacteroidia	Bacteroidales
15:000000000-AVD4R:1:1114:26033:20004_1_332_+	0	0	0	0	0	0	0	0	0	1	4
15:000000000-AVD4R:1:1114:27673:8058_28_324_-	0	1	0	0	0	1	0	0	0	0	0	Bacteria	Bacteroidetes	Bacteroidia	Bacteroidales				NADH-quinone oxidoreductase subunit B (EC 1.6.5.11) (NADH dehydrogenase I subunit B) (NDH-1 subunit B)	Complex I 20 kDa subunit family	NADH-ubiquinone oxidoreductase, 20 Kd subunit	[C] Energy production and conversion		K00331	1.6.5.11
15:000000000-AVD4R:1:1114:27882:14532_19_260_-	0	0	1	1	0	0	0	0	0	0	0								Tryptophanase (EC 4.1.99.1) (L-tryptophan indole-lyase) (TNase)	Beta-eliminating lyase family		[E] Amino acid transport and metabolism	L-tryptophan degradation via pyruvate pathway	K01667	4.1.99.1
15:000000000-AVD4R:1:1114:28170:9368_1_222_+	0	0	0	0	0	0	0	0	0	0	1	Bacteria	Firmicutes	Clostridia	Clostridiales	Eubacteriaceae	Eubacterium
15:000000000-AVD4R:1:1114:28295:11297_1_147_-	0	1	0	0	0	0	0	0	1	0	0	Bacteria	Bacteroidetes	Bacteroidia	Bacteroidales				Triosephosphate isomerase (TIM) (TPI) (EC 5.3.1.1) (Triose-phosphate isomerase)	Triosephosphate isomerase family	Triosephosphate isomerase, bacterial/eukaryotic	[G] Carbohydrate transport and metabolism	gluconeogenesis	K01803	5.3.1.1
15:000000000-AVD4R:1:1114:28385:14808_1_218_-	0	0	0	0	1	0	0	0	0	0	2	Bacteria	Firmicutes	Clostridia	Clostridiales	Oscillospiraceae	Oscillibacter
15:000000000-AVD4R:1:1114:2851:8183_1_212_+	1	1	1	2	1	0	0	0	0	0	0	Bacteria	Bacteroidetes	Bacteroidia	Bacteroidales	Bacteroidaceae	Bacteroides
15:000000000-AVD4R:1:1114:3712:16376_1_234_-	1	1	0	0	0	0	0	0	0	0	1	Bacteria	Firmicutes	Clostridia	Clostridiales				Pyruvate, phosphate dikinase (EC 2.7.9.1) (Pyruvate, orthophosphate dikinase)	PEP-utilizing enzyme family	Pyruvate, phosphate dikinase	[G] Carbohydrate transport and metabolism			2.7.9.1
15:000000000-AVD4R:1:1114:5865:13294_107_345_+	0	0	0	0	0	0	0	0	1	0	0	Bacteria							60 kDa chaperonin (GroEL protein) (Protein Cpn60)	Chaperonin (HSP60) family		[O] Posttranslational modification, protein turnover, chaperones		K04077
15:000000000-AVD4R:1:1114:5865:7593_1_352_-	0	0	0	0	0	0	0	0	1	0	0	Bacteria	Bacteroidetes	Bacteroidia	Bacteroidales
15:000000000-AVD4R:1:1114:6964:8252_1_234_+	1	1	0	0	0	0	0	0	0	0	0	Bacteria	Firmicutes	Clostridia	Clostridiales
15:000000000-AVD4R:1:1114:7187:16988_1_225_+	0	1	0	1	0	11	12	2	0	0	0
15:000000000-AVD4R:1:1114:7826:2674_1_221_-	0	0	0	1	0	0	0	0	0	0	0	Bacteria	Bacteroidetes	Bacteroidia	Bacteroidales	Bacteroidaceae			Altronate oxidoreductase (EC 1.1.1.58) (Tagaturonate dehydrogenase) (Tagaturonate reductase)	Mannitol dehydrogenase family, UxaB subfamily	Altronate oxidoreductase	[G] Carbohydrate transport and metabolism	pentose and glucuronate interconversion	K00041	1.1.1.58
15:000000000-AVD4R:1:1114:8489:16688_1_345_-	1	0	0	0	0	0	0	0	0	0	1	Bacteria	Firmicutes						NADPH-dependent butanol dehydrogenase (BDH) (EC 1.1.1.-)	Iron-containing alcohol dehydrogenase family		[C] Energy production and conversion			1.1.1.-
15:000000000-AVD4R:1:1114:8727:13617_1_313_-	0	0	0	0	0	1	1	0	1	0	0	Bacteria	Bacteroidetes	Bacteroidia	Bacteroidales							[P] Inorganic ion transport and metabolism
15:000000000-AVD4R:1:1114:8878:3754_1_346_+	0	0	2	0	0	0	1	0	0	0	0
15:000000000-AVD4R:1:1114:9363:12016_1_276_+	0	0	1	1	0	0	0	0	0	0	0	Bacteria	Bacteroidetes						Starch-binding protein SusD (Starch-utilization system protein D)	SusD family			starch degradation	K21572
15:000000000-AVD4R:1:1114:9534:11361_1_286_-	0	0	0	0	0	0	0	0	0	1	0	Bacteria	Bacteroidetes	Bacteroidia	Bacteroidales
15:000000000-AVD4R:1:1114:9868:4585_1_243_+	0	0	0	0	0	0	0	1	0	0	0	Bacteria	Firmicutes	Clostridia	Clostridiales							[G] Carbohydrate transport and metabolism
15:000000000-AVD4R:1:1115:10500:8490_1_334_-	0	0	0	0	0	1	1	0	0	0	0	Bacteria	Bacteroidetes	Bacteroidia	Bacteroidales
15:000000000-AVD4R:1:1115:11596:12804_1_261_+	0	0	0	0	0	0	0	0	1	0	0	Bacteria	Bacteroidetes						Fumarate reductase flavoprotein subunit (EC 1.3.5.4)	FAD-dependent oxidoreductase 2 family, FRD/SDH subfamily		[C] Energy production and conversion		K00244	1.3.5.4
15:000000000-AVD4R:1:1115:11627:5464_1_243_+	0	2	2	1	0	2	2	1	3	2	0	Bacteria	Bacteroidetes	Bacteroidia	Bacteroidales	Bacteroidaceae	Bacteroides					[M] Cell wall/membrane/envelope biogenesis
15:000000000-AVD4R:1:1115:11746:14700_1_302_+	1	0	0	1	0	0	0	1	0	1	1	Bacteria	Firmicutes	Clostridia	Clostridiales	Oscillospiraceae	Oscillibacter		3-hydroxybutyryl-CoA dehydrogenase (EC 1.1.1.157) (Beta-hydroxybutyryl-CoA dehydrogenase) (BHBD)	3-hydroxyacyl-CoA dehydrogenase family	3-hydroxyacyl-CoA dehydrogenase	[I] Lipid transport and metabolism	butanoate metabolism	K00074	1.1.1.157
15:000000000-AVD4R:1:1115:13684:16226_1_295_+	0	1	0	0	0	0	0	0	0	0	0	Bacteria	Firmicutes						Acetylornithine aminotransferase (ACOAT) (EC 2.6.1.11)	Class-III pyridoxal-phosphate-dependent aminotransferase family, ArgD subfamily		[E] Amino acid transport and metabolism	L-arginine biosynthesis	K00821	2.6.1.11
15:000000000-AVD4R:1:1115:14554:16436_1_303_-	0	0	0	0	0	1	1	1	0	0	0	Bacteria									Glycoside hydrolase, family 13
15:000000000-AVD4R:1:1115:14958:10404_1_264_+	0	0	0	0	0	0	0	0	3	0	0	Bacteria	Bacteroidetes	Bacteroidia	Bacteroidales
15:000000000-AVD4R:1:1115:15837:2327_1_310_-	1	0	3	1	0	0	1	5	0	0	0
15:000000000-AVD4R:1:1115:16550:4577_1_313_-	0	0	0	0	0	1	1	0	0	0	0	Bacteria	Firmicutes	Clostridia	Clostridiales	Lachnospiraceae		Lachnospiraceae bacterium 10-1	D-galactose-binding periplasmic protein (GBP) (D-galactose/ D-glucose-binding protein) (GGBP)	Bacterial solute-binding protein 2 family		[G] Carbohydrate transport and metabolism		K10540
15:000000000-AVD4R:1:1115:16728:12414_89_310_-	1	0	0	0	0	0	0	0	0	1	0	Bacteria	Firmicutes	Clostridia	Clostridiales				Acetyl-CoA acetyltransferase (EC 2.3.1.9) (Acetoacetyl-CoA thiolase)	Thiolase family		[I] Lipid transport and metabolism	(R)-mevalonate biosynthesis	K00626	2.3.1.9
15:000000000-AVD4R:1:1115:16810:15848_1_378_+	0	0	0	1	0	0	0	0	0	0	0
15:000000000-AVD4R:1:1115:17257:18818_1_214_-	0	0	0	0	0	2	2	0	0	0	0	Bacteria	Bacteroidetes	Bacteroidia	Bacteroidales			Bacteroidales bacterium 52_46
15:000000000-AVD4R:1:1115:17471:6582_1_276_-	0	0	0	1	0	0	0	0	0	0	0	Bacteria	Firmicutes									[M] Cell wall/membrane/envelope biogenesis
15:000000000-AVD4R:1:1115:19582:11007_1_237_+	0	0	0	0	0	0	0	0	1	0	0	Bacteria	Bacteroidetes	Bacteroidia	Bacteroidales	Prevotellaceae	Prevotella		Caffeyl-CoA reductase-Etf complex subunit CarC (EC 1.3.1.108) (Caffeoyl-CoA reductase CarC) (NADH-dependent caffeyl-CoA reduction)	Acyl-CoA dehydrogenase family		[I] Lipid transport and metabolism			1.3.1.108
15:000000000-AVD4R:1:1115:19593:13918_1_300_-	1	0	0	0	0	0	0	0	0	0	0	Bacteria	Bacteroidetes	Bacteroidia	Bacteroidales	Prevotellaceae
15:000000000-AVD4R:1:1115:19626:15563_1_249_+	0	0	0	0	0	0	0	1	0	0	0
15:000000000-AVD4R:1:1115:19687:13683_1_377_-	1	1	1	1	1	0	0	0	1	1	0	Bacteria	Bacteroidetes	Bacteroidia	Bacteroidales	Bacteroidaceae	Bacteroides
15:000000000-AVD4R:1:1115:20354:14125_1_271_-	0	0	0	0	0	0	0	0	1	0	0	Bacteria	Bacteroidetes	Bacteroidia	Bacteroidales							[M] Cell wall/membrane/envelope biogenesis
15:000000000-AVD4R:1:1115:20525:23463_1_296_-	0	0	0	1	0	0	0	0	0	0	0
15:000000000-AVD4R:1:1115:20874:20130_1_259_+	0	1	0	0	0	0	0	0	0	0	0	Bacteria	Bacteroidetes	Bacteroidia	Bacteroidales	Prevotellaceae	Prevotella	Prevotella sp. CAG:1031
15:000000000-AVD4R:1:1115:20914:3301_1_249_+	4	0	0	0	0	0	0	0	0	0	0
15:000000000-AVD4R:1:1115:21099:15512_1_238_+	0	1	1	0	1	1	1	0	1	0	0
15:000000000-AVD4R:1:1115:21817:9570_1_312_-	0	0	1	1	0	1	0	0	1	0	0	Bacteria	Bacteroidetes	Bacteroidia	Bacteroidales	Porphyromonadaceae	Petrimonas	Petrimonas mucosa				[P] Inorganic ion transport and metabolism
15:000000000-AVD4R:1:1115:21994:12510_47_308_-	0	0	0	0	0	1	0	0	1	0	0	Bacteria	Bacteroidetes	Bacteroidia	Bacteroidales							[P] Inorganic ion transport and metabolism
15:000000000-AVD4R:1:1115:22336:4439_1_265_-	0	0	0	0	0	0	0	0	1	1	0	Bacteria	Bacteroidetes	Bacteroidia	Bacteroidales
15:000000000-AVD4R:1:1115:22338:20419_1_365_+	0	0	0	0	0	3	2	1	0	0	0	Bacteria	Bacteroidetes	Bacteroidia	Bacteroidales	Prevotellaceae	Prevotella	Prevotella sp. CAG:1031
15:000000000-AVD4R:1:1115:22607:20729_1_289_+	2	1	1	1	0	0	0	0	1	2	2	Bacteria	Bacteroidetes	Bacteroidia	Bacteroidales	Bacteroidaceae	Bacteroides		Enolase (EC 4.2.1.11) (2-phospho-D-glycerate hydro-lyase) (2-phosphoglycerate dehydratase)	Enolase family	Enolase	[G] Carbohydrate transport and metabolism	glycolysis	K01689	4.2.1.11
15:000000000-AVD4R:1:1115:23312:12449_1_258_-	3	2	2	1	3	2	1	2	3	3	2	Bacteria	Firmicutes	Bacilli	Lactobacillales	Lactobacillaceae	Lactobacillus	Lactobacillus murinus
15:000000000-AVD4R:1:1115:23452:15021_1_237_+	0	1	1	1	0	0	0	0	0	0	0	Bacteria	Firmicutes	Clostridia	Clostridiales				Flagellin	Bacterial flagellin family				K02406
15:000000000-AVD4R:1:1115:23837:7379_1_254_-	2	0	0	0	3	2	1	0	0	1	5
15:000000000-AVD4R:1:1115:24702:9773_1_286_+	1	1	0	0	0	0	0	0	0	0	0
15:000000000-AVD4R:1:1115:24952:11234_1_209_-	1	2	2	1	4	0	0	0	4	3	1
15:000000000-AVD4R:1:1115:25271:5175_1_216_-	0	0	1	1	0	1	0	0	0	0	0	Bacteria	Bacteroidetes	Bacteroidia	Bacteroidales	Bacteroidaceae	Bacteroides		Triosephosphate isomerase (TIM) (TPI) (EC 5.3.1.1) (Triose-phosphate isomerase)	Triosephosphate isomerase family	Triosephosphate isomerase, bacterial/eukaryotic	[G] Carbohydrate transport and metabolism	gluconeogenesis	K01803	5.3.1.1
15:000000000-AVD4R:1:1115:25588:19189_1_272_-	0	0	0	0	0	1	1	0	0	0	0	Bacteria	Bacteroidetes	Bacteroidia	Bacteroidales
15:000000000-AVD4R:1:1115:25665:9399_1_300_+	1	1	1	1	1	1	1	1	1	1	1	Bacteria	Bacteroidetes	Bacteroidia	Bacteroidales	Rikenellaceae	Alistipes		NAD-specific glutamate dehydrogenase (NAD-GDH) (EC 1.4.1.2) (NADH-dependent glutamate dehydrogenase)	Glu/Leu/Phe/Val dehydrogenases family	Glutamate dehydrogenase	[E] Amino acid transport and metabolism		K00262	1.4.1.2
15:000000000-AVD4R:1:1115:26253:13653_1_289_+	0	0	0	0	0	0	1	0	0	0	0	Bacteria	Bacteroidetes	Bacteroidia	Bacteroidales							[O] Posttranslational modification, protein turnover, chaperones
15:000000000-AVD4R:1:1115:26317:16712_1_306_-	0	0	0	0	0	0	4	1	0	0	0	Bacteria	Bacteroidetes	Bacteroidia	Bacteroidales							[P] Inorganic ion transport and metabolism
15:000000000-AVD4R:1:1115:27941:10304_1_151_+	0	0	0	2	0	0	0	0	0	0	0	Bacteria	Firmicutes
15:000000000-AVD4R:1:1115:28158:12116_1_386_+	4	3	3	0	0	0	0	0	3	0	0	Bacteria	Bacteroidetes	Bacteroidia	Bacteroidales	Bacteroidaceae	Bacteroides
15:000000000-AVD4R:1:1115:28195:13185_1_347_+	0	0	1	0	0	0	0	0	0	0	0	Bacteria	Bacteroidetes	Bacteroidia	Bacteroidales
15:000000000-AVD4R:1:1115:3839:8192_1_349_+	0	1	0	1	1	0	0	0	1	0	0	Bacteria	Bacteroidetes
15:000000000-AVD4R:1:1115:4936:9375_1_156_+	0	0	0	0	0	0	0	1	0	0	0
15:000000000-AVD4R:1:1115:7376:13585_1_208_+	1	0	0	0	0	0	0	0	0	0	1	Bacteria	Firmicutes						Carbon monoxide dehydrogenase/acetyl-CoA synthase subunit alpha (ACS subunit) (Acetyl-CoA synthase subunit) (CODH/ACS) (EC 2.3.1.169)		CO dehydrogenase/acetyl-CoA synthase complex beta subunit				2.3.1.169
15:000000000-AVD4R:1:1115:8193:5720_1_329_-	0	0	0	0	0	0	0	0	0	0	1	Bacteria	Firmicutes									[G] Carbohydrate transport and metabolism
15:000000000-AVD4R:1:1115:8536:9807_1_317_-	2	0	0	0	0	0	0	0	0	0	0	Bacteria									Endonuclease I
15:000000000-AVD4R:1:1115:9077:7942_1_241_+	0	2	0	2	0	0	0	2	0	2	2	Bacteria	Firmicutes	Clostridia	Clostridiales				Protein FixB	ETF alpha-subunit/FixB family	Electron transfer flavoprotein, alpha subunit	[C] Energy production and conversion
15:000000000-AVD4R:1:1116:10153:12893_1_233_+	0	0	0	0	0	0	0	0	0	0	1	Bacteria	Firmicutes						50S ribosomal protein L5	Universal ribosomal protein uL5 family	Ribosomal protein L5, bacterial-type	[J] Translation, ribosomal structure and biogenesis		K02931
15:000000000-AVD4R:1:1116:10338:17579_1_358_-	0	1	1	1	1	1	1	0	0	1	1
15:000000000-AVD4R:1:1116:10783:15274_1_335_+	0	1	0	0	0	0	0	0	0	0	0	Bacteria	Bacteroidetes	Bacteroidia	Bacteroidales
15:000000000-AVD4R:1:1116:12280:3167_1_271_-	2	0	0	0	0	0	0	1	0	2	1	Bacteria	Firmicutes	Clostridia	Clostridiales				30S ribosomal protein S1	Bacterial ribosomal protein bS1 family	Ribosomal protein S1	[J] Translation, ribosomal structure and biogenesis
15:000000000-AVD4R:1:1116:12720:3973_23_285_+	0	1	0	0	0	0	0	0	0	0	0	Bacteria	Firmicutes	Clostridia	Clostridiales	Lachnospiraceae	Lachnoclostridium		30S ribosomal protein S19	Universal ribosomal protein uS19 family	Ribosomal protein S19, bacterial-type	[J] Translation, ribosomal structure and biogenesis		K02965
15:000000000-AVD4R:1:1116:12926:7277_1_252_-	2	0	0	0	0	0	0	0	0	0	0	Bacteria	Firmicutes	Clostridia							Flagellin	[N] Cell motility
15:000000000-AVD4R:1:1116:13608:22288_1_258_+	0	1	0	0	0	1	1	1	0	0	0	Eukaryota										[O] Posttranslational modification, protein turnover, chaperones
15:000000000-AVD4R:1:1116:13811:6027_1_262_+	0	0	0	1	0	0	0	0	0	0	0
15:000000000-AVD4R:1:1116:13973:23522_1_264_-	0	1	0	1	0	0	0	1	0	0	0	Bacteria	Firmicutes	Clostridia	Clostridiales	Lachnospiraceae			Pyruvate, phosphate dikinase (EC 2.7.9.1) (Pyruvate, orthophosphate dikinase)	PEP-utilizing enzyme family	Pyruvate, phosphate dikinase	[G] Carbohydrate transport and metabolism			2.7.9.1
15:000000000-AVD4R:1:1116:14040:14077_1_267_-	0	0	1	0	0	0	0	0	1	1	0	Bacteria	Bacteroidetes	Bacteroidia	Bacteroidales				30S ribosomal protein S7	Universal ribosomal protein uS7 family	Ribosomal protein S7, bacterial/organellar-type	[J] Translation, ribosomal structure and biogenesis		K02992
15:000000000-AVD4R:1:1116:14052:18025_1_362_+	2	1	4	2	2	6	5	3	5	2	1	Bacteria	Bacteroidetes	Bacteroidia	Bacteroidales							[P] Inorganic ion transport and metabolism
15:000000000-AVD4R:1:1116:14678:11131_1_235_-	0	0	0	0	0	0	1	0	0	0	0	Bacteria	Bacteroidetes	Bacteroidia	Bacteroidales				GTPase Der (GTP-binding protein EngA)	TRAFAC class TrmE-Era-EngA-EngB-Septin-like GTPase superfamily, EngA (Der) GTPase family	GTP-binding protein EngA			K03977
15:000000000-AVD4R:1:1116:14678:11638_1_311_-	0	0	0	0	0	0	0	0	0	2	0	Bacteria	Bacteroidetes	Bacteroidia	Bacteroidales							[P] Inorganic ion transport and metabolism
15:000000000-AVD4R:1:1116:14930:3738_1_258_-	0	0	0	0	1	0	0	0	0	0	0
15:000000000-AVD4R:1:1116:15231:12857_1_217_+	2	1	1	1	2	1	2	0	2	1	1	Bacteria	Bacteroidetes	Bacteroidia	Bacteroidales				Serine--tRNA ligase (EC 6.1.1.11) (Seryl-tRNA synthetase) (SerRS) (Seryl-tRNA(Ser/Sec) synthetase)	Class-II aminoacyl-tRNA synthetase family, Type-1 seryl-tRNA synthetase subfamily	Serine-tRNA ligase, type1	[J] Translation, ribosomal structure and biogenesis	selenocysteinyl-tRNA(Sec) biosynthesis	K01875	6.1.1.11
15:000000000-AVD4R:1:1116:15554:6532_1_351_+	0	0	0	0	0	0	0	0	0	1	1	Bacteria	Firmicutes	Clostridia	Clostridiales	Lachnospiraceae						[G] Carbohydrate transport and metabolism
15:000000000-AVD4R:1:1116:15865:1328_1_94_+	0	0	0	0	0	0	0	0	1	0	0	Bacteria	Bacteroidetes	Bacteroidia	Bacteroidales	Bacteroidaceae	Bacteroides				Fructose-1,6-bisphosphate aldolase, class 2	[G] Carbohydrate transport and metabolism
15:000000000-AVD4R:1:1116:16115:8060_1_208_+	0	0	0	0	0	0	0	0	0	1	1	Bacteria	Bacteroidetes						60 kDa chaperonin (GroEL protein) (Protein Cpn60)	Chaperonin (HSP60) family		[O] Posttranslational modification, protein turnover, chaperones		K04077
15:000000000-AVD4R:1:1116:16222:10084_1_274_-	1	0	0	0	0	0	0	0	0	0	0
15:000000000-AVD4R:1:1116:16994:14294_1_348_-	4	3	0	4	2	3	3	4	0	5	5	Bacteria	Firmicutes	Clostridia	Clostridiales				L-fucose isomerase (EC 5.3.1.25) (6-deoxy-L-galactose isomerase) (FucIase)	L-fucose isomerase family	L-fucose isomerase	[G] Carbohydrate transport and metabolism	L-fucose degradation	K01818	5.3.1.25
15:000000000-AVD4R:1:1116:17107:10264_1_307_+	1	1	1	1	0	0	0	0	0	0	0
15:000000000-AVD4R:1:1116:17188:6749_74_329_+	0	0	0	0	0	0	0	0	1	0	0	Bacteria	Bacteroidetes	Bacteroidia	Bacteroidales							[P] Inorganic ion transport and metabolism
15:000000000-AVD4R:1:1116:17279:22576_1_252_+	0	1	0	1	1	0	0	1	0	1	1	Bacteria	Firmicutes	Clostridia	Clostridiales				Acyl-CoA dehydrogenase, short-chain specific (EC 1.3.8.1) (Butyryl-CoA dehydrogenase) (SCAD)	Acyl-CoA dehydrogenase family		[I] Lipid transport and metabolism	butanoate metabolism	K00248	1.3.8.1
15:000000000-AVD4R:1:1116:17812:9185_1_338_+	0	0	0	0	0	0	0	0	0	0	1	Bacteria	Firmicutes	Clostridia	Clostridiales	Lachnospiraceae		Lachnospiraceae bacterium 28-4	Methyl-accepting chemotaxis protein 4		Chemotaxis methyl-accepting receptor			K03406
15:000000000-AVD4R:1:1116:18267:3014_1_211_+	0	0	0	0	0	1	0	0	0	0	0	Bacteria	Bacteroidetes	Bacteroidia	Bacteroidales	Prevotellaceae	Prevotella	Prevotella sp. CAG:1058				[P] Inorganic ion transport and metabolism
15:000000000-AVD4R:1:1116:19488:14859_1_270_+	1	0	0	0	1	0	0	0	0	0	0	Bacteria	Firmicutes	Tissierellia	Tissierellales	Peptoniphilaceae	Finegoldia	Finegoldia magna	Enolase (EC 4.2.1.11) (2-phospho-D-glycerate hydro-lyase) (2-phosphoglycerate dehydratase)	Enolase family	Enolase	[G] Carbohydrate transport and metabolism	glycolysis	K01689	4.2.1.11
15:000000000-AVD4R:1:1116:20633:19636_1_193_+	0	3	0	1	0	2	0	2	0	3	2	Eukaryota	Chordata	Mammalia	Rodentia						Keratin, type II
15:000000000-AVD4R:1:1116:20705:18194_1_321_+	1	1	1	1	1	1	1	1	1	2	2	Bacteria	Bacteroidetes	Cytophagia	Cytophagales	Flammeovirgaceae	Flammeovirga	Flammeovirga pacifica				[C] Energy production and conversion
15:000000000-AVD4R:1:1116:21122:18735_1_256_+	1	0	1	0	1	0	0	0	0	0	1
15:000000000-AVD4R:1:1116:21139:13362_1_246_-	3	4	3	4	3	3	3	3	5	4	5	Bacteria	Firmicutes	Clostridia	Clostridiales				Glyceraldehyde-3-phosphate dehydrogenase (GAPDH) (EC 1.2.1.12) (NAD-dependent glyceraldehyde-3-phosphate dehydrogenase)	Glyceraldehyde-3-phosphate dehydrogenase family	Glyceraldehyde/Erythrose phosphate dehydrogenase family	[G] Carbohydrate transport and metabolism	glycolysis	K00134	1.2.1.12
15:000000000-AVD4R:1:1116:22005:8128_1_229_-	1	0	0	0	0	0	0	1	0	0	0	Bacteria	Firmicutes						Flagellum-specific ATP synthase (EC 3.6.3.14)	ATPase alpha/beta chains family	ATPase, type III secretion system, FliI	[N] Cell motility		K02412	3.6.3.14
15:000000000-AVD4R:1:1116:22449:9858_1_347_-	0	0	0	1	0	0	1	0	0	0	0	Bacteria	Firmicutes									[G] Carbohydrate transport and metabolism
15:000000000-AVD4R:1:1116:23880:7604_1_332_-	0	0	0	0	0	0	0	0	0	0	1	Bacteria	Firmicutes	Clostridia	Clostridiales				DNA-directed RNA polymerase subunit beta (RNAP subunit beta) (EC 2.7.7.6) (RNA polymerase subunit beta) (Transcriptase subunit beta)	RNA polymerase beta chain family	DNA-directed RNA polymerase, subunit 2	[K] Transcription		K03043	2.7.7.6
15:000000000-AVD4R:1:1116:24447:8827_1_235_+	0	0	1	0	0	0	0	0	0	0	0
15:000000000-AVD4R:1:1116:24696:6300_1_297_+	0	0	0	0	0	0	0	0	1	0	0	Bacteria	Bacteroidetes	Bacteroidia	Bacteroidales	Prevotellaceae	Prevotella		Periplasmic serine endoprotease DegP (EC 3.4.21.107) (Heat shock protein DegP) (Protease Do)	Peptidase S1C family	Peptidase S1C, Do	[O] Posttranslational modification, protein turnover, chaperones		K04771	3.4.21.107
15:000000000-AVD4R:1:1116:25206:8094_1_271_-	0	0	0	0	0	0	0	0	1	0	0	Bacteria	Bacteroidetes	Bacteroidia	Bacteroidales	Tannerellaceae	Parabacteroides		DNA-directed RNA polymerase subunit beta' (RNAP subunit beta') (EC 2.7.7.6) (RNA polymerase subunit beta') (Transcriptase subunit beta')	RNA polymerase beta' chain family	DNA-directed RNA polymerase, subunit beta-prime	[K] Transcription		K03046	2.7.7.6
15:000000000-AVD4R:1:1116:25345:13492_1_159_+	0	0	0	1	0	0	0	0	0	0	0	Bacteria	Firmicutes						50S ribosomal protein L23	Universal ribosomal protein uL23 family		[J] Translation, ribosomal structure and biogenesis		K02892
15:000000000-AVD4R:1:1116:25933:14307_1_295_-	1	0	0	0	0	0	0	1	0	0	0	Bacteria	Bacteroidetes	Bacteroidia	Bacteroidales	Prevotellaceae	Alloprevotella		DNA-directed RNA polymerase subunit beta (RNAP subunit beta) (EC 2.7.7.6) (RNA polymerase subunit beta) (Transcriptase subunit beta)	RNA polymerase beta chain family	DNA-directed RNA polymerase, subunit 2	[K] Transcription		K03043	2.7.7.6
15:000000000-AVD4R:1:1116:2633:10529_1_298_-	1	1	0	0	0	0	0	0	0	2	3	Bacteria	Firmicutes	Clostridia	Clostridiales				Elongation factor Tu (EF-Tu)	TRAFAC class translation factor GTPase superfamily, Classic translation factor GTPase family, EF-Tu/EF-1A subfamily	Translation elongation factor EFTu/EF1A, bacterial/organelle	[J] Translation, ribosomal structure and biogenesis		K02358
15:000000000-AVD4R:1:1116:26485:12415_1_173_-	1	1	0	0	0	0	0	0	0	1	1
15:000000000-AVD4R:1:1116:27833:11642_1_352_-	0	1	0	0	0	0	0	0	1	1	0	Bacteria	Bacteroidetes	Bacteroidia	Bacteroidales				Elongation factor Tu (EF-Tu)	TRAFAC class translation factor GTPase superfamily, Classic translation factor GTPase family, EF-Tu/EF-1A subfamily	Translation elongation factor EFTu/EF1A, bacterial/organelle	[J] Translation, ribosomal structure and biogenesis		K02358
15:000000000-AVD4R:1:1116:6031:14616_1_270_-	1	1	0	1	0	0	0	0	0	0	0	Bacteria	Firmicutes	Clostridia	Clostridiales	Lachnospiraceae	Lachnoclostridium
15:000000000-AVD4R:1:1116:6400:12068_1_280_-	0	0	0	0	0	0	1	0	0	0	0
15:000000000-AVD4R:1:1116:6971:11504_1_243_+	0	2	2	2	1	2	2	1	2	1	0
15:000000000-AVD4R:1:1116:7299:20362_1_232_+	0	0	0	0	1	0	0	0	0	0	0	Bacteria	Bacteroidetes	Bacteroidia	Bacteroidales	Prevotellaceae	Paraprevotella
15:000000000-AVD4R:1:1116:8266:9718_1_224_+	0	0	0	0	1	0	0	0	0	0	0	Bacteria	Bacteroidetes	Bacteroidia	Bacteroidales			Bacteroidales bacterium 52_46			Glycoside hydrolase, family 13	[G] Carbohydrate transport and metabolism
15:000000000-AVD4R:1:1116:8941:10914_1_262_+	1	0	1	1	0	1	1	1	1	1	1	Bacteria	Firmicutes
15:000000000-AVD4R:1:1116:9189:11624_1_240_-	0	0	0	0	0	0	0	0	1	0	0	Bacteria	Bacteroidetes	Bacteroidia	Bacteroidales
15:000000000-AVD4R:1:1116:9524:15079_1_234_-	0	0	0	0	0	1	1	0	0	0	0
15:000000000-AVD4R:1:1116:9610:2419_1_286_-	1	1	1	1	1	1	1	1	1	1	1	Bacteria							Methylmalonyl-CoA mutase large subunit (EC 5.4.99.2) (MCM-alpha)	Methylmalonyl-CoA mutase family		[I] Lipid transport and metabolism	propanoyl-CoA degradation	K01847	5.4.99.2
15:000000000-AVD4R:1:1116:9962:6885_1_226_+	0	0	1	0	0	0	0	0	0	0	0	Bacteria	Bacteroidetes	Bacteroidia	Bacteroidales	Prevotellaceae					Peptidase C1B, bleomycin hydrolase	[E] Amino acid transport and metabolism
15:000000000-AVD4R:1:1117:10396:14038_1_275_+	3	0	0	0	0	0	0	0	0	0	0	Bacteria	Firmicutes
15:000000000-AVD4R:1:1117:10691:12868_1_374_+	0	0	0	0	1	1	0	2	0	0	0	Bacteria	Bacteroidetes	Bacteroidia	Bacteroidales	Bacteroidaceae	Bacteroides
15:000000000-AVD4R:1:1117:10700:2633_1_205_+	0	0	0	2	3	2	3	3	2	3	3	Bacteria	Firmicutes
15:000000000-AVD4R:1:1117:10954:3110_1_228_-	1	1	1	2	0	1	1	1	1	1	1	Bacteria	Firmicutes
15:000000000-AVD4R:1:1117:11238:9185_1_251_+	1	1	1	0	1	1	1	0	1	1	1	Bacteria	Bacteroidetes	Bacteroidia	Bacteroidales				NAD-specific glutamate dehydrogenase (NAD-GDH) (EC 1.4.1.2) (NADH-dependent glutamate dehydrogenase)	Glu/Leu/Phe/Val dehydrogenases family	Glutamate dehydrogenase	[E] Amino acid transport and metabolism		K00262	1.4.1.2
15:000000000-AVD4R:1:1117:12422:8113_1_369_-	0	0	0	0	0	0	0	0	1	0	0	Bacteria	Bacteroidetes	Bacteroidia	Bacteroidales
15:000000000-AVD4R:1:1117:14130:6599_1_228_+	0	0	2	1	0	0	0	0	2	3	1	Bacteria	Bacteroidetes	Bacteroidia	Bacteroidales	Prevotellaceae	Prevotella	Prevotella sp. CAG:873
15:000000000-AVD4R:1:1117:14369:9944_67_364_-	2	1	1	0	1	2	2	0	0	2	0	Bacteria	Bacteroidetes	Bacteroidia	Bacteroidales	Bacteroidaceae			Altronate oxidoreductase (EC 1.1.1.58) (Tagaturonate dehydrogenase) (Tagaturonate reductase)	Mannitol dehydrogenase family, UxaB subfamily	Altronate oxidoreductase	[G] Carbohydrate transport and metabolism	pentose and glucuronate interconversion	K00041	1.1.1.58
15:000000000-AVD4R:1:1117:14751:15245_45_285_+	0	0	0	0	0	0	0	0	0	1	1
15:000000000-AVD4R:1:1117:14890:16564_1_297_+	0	1	0	0	0	0	0	0	0	0	0	Bacteria	Firmicutes	Clostridia	Clostridiales	Lachnospiraceae	Faecalicatena	Faecalicatena contorta	UPF0145 protein NT01CX_0170	UPF0145 family
15:000000000-AVD4R:1:1117:15396:14497_1_221_+	0	1	0	0	0	0	0	0	0	1	0	Bacteria	Firmicutes									[C] Energy production and conversion
15:000000000-AVD4R:1:1117:16685:12302_2_336_-	1	1	1	1	0	0	1	1	1	0	1	Bacteria	Bacteroidetes	Bacteroidia	Bacteroidales				Formyl-CoA:oxalate CoA-transferase (FCOCT) (EC 2.8.3.16) (Formyl-coenzyme A transferase) (Formyl-CoA transferase)	CaiB/BaiF CoA-transferase family	Formyl-CoA:oxalate CoA-transferase	[C] Energy production and conversion	oxalate degradation	K07749	2.8.3.16
15:000000000-AVD4R:1:1117:16998:12935_1_276_-	0	0	1	0	0	1	1	0	1	0	0	Bacteria	Bacteroidetes	Bacteroidia	Bacteroidales	Prevotellaceae			50S ribosomal protein L2	Universal ribosomal protein uL2 family	Ribosomal protein L2, bacterial/organellar-type	[J] Translation, ribosomal structure and biogenesis		K02886
15:000000000-AVD4R:1:1117:17817:7968_1_265_-	0	0	0	0	0	0	0	1	0	0	0	Bacteria	Firmicutes	Clostridia	Clostridiales	Lachnospiraceae			Elongation factor G (EF-G)	TRAFAC class translation factor GTPase superfamily, Classic translation factor GTPase family, EF-G/EF-2 subfamily	Translation elongation factor EFG/EF2	[J] Translation, ribosomal structure and biogenesis		K02355
15:000000000-AVD4R:1:1117:18201:2806_1_243_+	1	1	0	0	1	1	0	0	1	1	0	Bacteria	Firmicutes						50S ribosomal protein L2	Universal ribosomal protein uL2 family	Ribosomal protein L2, bacterial/organellar-type	[J] Translation, ribosomal structure and biogenesis		K02886
15:000000000-AVD4R:1:1117:18584:8278_1_283_+	0	0	1	0	1	1	1	1	0	0	0	Bacteria							60 kDa chaperonin (GroEL protein) (Protein Cpn60)	Chaperonin (HSP60) family		[O] Posttranslational modification, protein turnover, chaperones		K04077
15:000000000-AVD4R:1:1117:18644:16024_1_385_+	0	0	0	0	0	0	1	0	0	0	0	Bacteria	Bacteroidetes	Bacteroidia	Bacteroidales				Superoxide dismutase [Mn/Fe] (EC 1.15.1.1)	Iron/manganese superoxide dismutase family	Manganese/iron superoxide dismutase			K04564	1.15.1.1
15:000000000-AVD4R:1:1117:18968:4904_1_215_-	0	0	0	0	0	2	3	0	0	0	0	Bacteria	Bacteroidetes	Bacteroidia	Bacteroidales				30S ribosomal protein S15	Universal ribosomal protein uS15 family	Ribosomal protein S15, bacterial-type			K02956
15:000000000-AVD4R:1:1117:19122:13299_1_264_+	0	1	0	1	0	0	0	1	0	2	2	Bacteria	Firmicutes	Clostridia	Clostridiales				Caffeyl-CoA reductase-Etf complex subunit CarD (EC 1.3.1.108) (Electron transfer flavoprotein small subunit) (ETFSS) (Electron transfer flavoprotein subunit beta) (Beta-ETF)	ETF beta-subunit/FixA family	Electron transfer flavoprotein, beta subunit	[C] Energy production and conversion		K03521	1.3.1.108
15:000000000-AVD4R:1:1117:19159:12263_1_205_-	0	1	0	0	0	0	0	0	0	0	0	Bacteria	Firmicutes	Clostridia	Clostridiales		Flavonifractor		Elongation factor Tu (EF-Tu)	TRAFAC class translation factor GTPase superfamily, Classic translation factor GTPase family, EF-Tu/EF-1A subfamily	Translation elongation factor EFTu/EF1A, bacterial/organelle	[J] Translation, ribosomal structure and biogenesis		K02358
15:000000000-AVD4R:1:1117:20320:5913_1_282_+	0	0	0	1	0	0	0	0	0	0	0	Bacteria	Firmicutes	Clostridia	Clostridiales	Lachnospiraceae	Lachnoclostridium
15:000000000-AVD4R:1:1117:21259:15226_1_333_-	0	0	1	0	1	1	1	0	1	0	0	Bacteria	Bacteroidetes	Bacteroidia	Bacteroidales				30S ribosomal protein S2	Universal ribosomal protein uS2 family	Ribosomal protein S2, bacteria/mitochondria/plastid	[J] Translation, ribosomal structure and biogenesis		K02967
15:000000000-AVD4R:1:1117:21344:12564_1_297_-	0	0	1	0	0	0	0	0	0	0	0	Bacteria
15:000000000-AVD4R:1:1117:21723:11680_1_326_+	0	0	0	0	0	0	0	0	4	0	0	Bacteria									Gram-negative bacterial TonB protein
15:000000000-AVD4R:1:1117:21852:15016_1_317_-	1	0	1	1	0	0	0	0	0	0	0	Bacteria	Bacteroidetes	Bacteroidia	Bacteroidales
15:000000000-AVD4R:1:1117:22332:17999_1_267_-	0	0	2	2	0	0	0	0	0	2	3	Bacteria	Bacteroidetes	Bacteroidia	Bacteroidales	Prevotellaceae	Prevotella	Prevotella sp. CAG:873
15:000000000-AVD4R:1:1117:22536:9840_1_227_+	0	0	0	0	0	0	0	1	0	0	0
15:000000000-AVD4R:1:1117:23213:15629_1_348_+	0	1	0	0	0	0	0	0	0	0	0	Bacteria	Bacteroidetes	Bacteroidia	Bacteroidales						Protein-(glutamine-N5) methyltransferase, release factor-specific
15:000000000-AVD4R:1:1117:23643:16539_1_242_-	3	0	0	0	0	0	0	0	0	0	0	Bacteria	Firmicutes						Flagellin (Fragment)	Bacterial flagellin family	Flagellin	[N] Cell motility
15:000000000-AVD4R:1:1117:23916:21759_1_247_-	0	0	0	1	1	0	0	0	0	0	0
15:000000000-AVD4R:1:1117:23939:19117_1_384_-	0	0	0	0	1	0	0	0	1	0	0	Bacteria	Bacteroidetes	Bacteroidia	Bacteroidales
15:000000000-AVD4R:1:1117:24032:20088_1_208_-	0	1	0	0	0	0	0	0	0	0	0	Bacteria	Firmicutes	Clostridia	Clostridiales	Oscillospiraceae	Oscillibacter	Oscillibacter sp. 1-3	Lysine 5,6-aminomutase alpha subunit (5,6-LAM) (EC 5.4.3.3) (D-lysine 5,6-aminomutase alpha subunit) (L-beta-lysine 5,6-aminomutase alpha subunit)	KamD family			lysine degradation	K01844	5.4.3.3
15:000000000-AVD4R:1:1117:24126:14706_1_321_+	0	0	1	0	0	0	0	0	0	1	1
15:000000000-AVD4R:1:1117:24126:3495_1_230_+	1	0	0	0	0	0	0	0	0	0	0	Bacteria	Bacteroidetes	Bacteroidia	Bacteroidales
15:000000000-AVD4R:1:1117:24253:2193_1_259_-	0	0	1	0	0	2	2	0	0	0	0
15:000000000-AVD4R:1:1117:24752:3790_1_296_+	1	1	1	1	2	0	2	2	0	1	1
15:000000000-AVD4R:1:1117:25317:9086_1_288_+	0	0	0	1	0	0	0	0	0	0	0	Bacteria	Firmicutes	Clostridia	Clostridiales				Glucosamine-6-phosphate deaminase (EC 3.5.99.6) (GlcN6P deaminase) (GNPDA) (Glucosamine-6-phosphate isomerase)	Glucosamine/galactosamine-6-phosphate isomerase family, NagB subfamily	Glucosamine-6-phosphate isomerase	[G] Carbohydrate transport and metabolism	N-acetylneuraminate degradation	K02564	3.5.99.6
15:000000000-AVD4R:1:1117:25468:21027_1_324_+	0	0	0	0	0	3	2	2	1	0	0	Bacteria	Bacteroidetes	Bacteroidia	Bacteroidales	Bacteroidaceae	Bacteroides	Bacteroides caecimuris
15:000000000-AVD4R:1:1117:25564:11775_1_319_-	0	0	0	0	0	0	0	1	0	0	0
15:000000000-AVD4R:1:1117:25653:17655_1_251_-	0	0	0	0	3	3	3	2	2	0	0
15:000000000-AVD4R:1:1117:26159:21743_1_207_+	0	1	1	0	0	0	0	0	0	0	0	Bacteria	Firmicutes	Negativicutes	Acidaminococcales	Acidaminococcaceae	Phascolarctobacterium	Phascolarctobacterium succinatutens				[P] Inorganic ion transport and metabolism
15:000000000-AVD4R:1:1117:26306:11350_1_254_-	2	2	1	1	2	1	1	2	1	2	2	Bacteria	Bacteroidetes	Bacteroidia	Bacteroidales
15:000000000-AVD4R:1:1117:26588:14236_1_310_+	0	2	1	0	0	1	1	0	1	1	0	Bacteria	Bacteroidetes						Pyruvate, phosphate dikinase (EC 2.7.9.1) (Pyruvate, orthophosphate dikinase)	PEP-utilizing enzyme family	Pyruvate, phosphate dikinase	[G] Carbohydrate transport and metabolism			2.7.9.1
15:000000000-AVD4R:1:1117:26882:11504_1_263_-	1	0	0	0	0	0	0	0	0	0	0
15:000000000-AVD4R:1:1117:28103:18084_1_260_-	0	0	0	0	3	0	0	0	0	0	0											[I] Lipid transport and metabolism
15:000000000-AVD4R:1:1117:3191:8373_1_250_+	0	0	0	0	0	0	0	0	1	0	0	Bacteria	Bacteroidetes	Bacteroidia	Bacteroidales	Prevotellaceae	Prevotella		Glyceraldehyde-3-phosphate dehydrogenase (GAPDH) (EC 1.2.1.12) (NAD-dependent glyceraldehyde-3-phosphate dehydrogenase)	Glyceraldehyde-3-phosphate dehydrogenase family	Glyceraldehyde/Erythrose phosphate dehydrogenase family	[G] Carbohydrate transport and metabolism	glycolysis	K00134	1.2.1.12
15:000000000-AVD4R:1:1117:4171:8660_1_282_-	0	0	0	0	0	0	0	0	1	0	0	Bacteria									Gram-negative bacterial TonB protein	[M] Cell wall/membrane/envelope biogenesis
15:000000000-AVD4R:1:1117:4368:6855_1_248_-	0	1	1	1	1	0	0	0	1	1	0
15:000000000-AVD4R:1:1117:6922:9393_1_246_-	0	0	0	0	0	0	0	0	0	1	2	Bacteria	Firmicutes						Butyrate kinase (BK) (EC 2.7.2.7)	Acetokinase family	Butyrate kinase	[C] Energy production and conversion	butanoate metabolism	K00929	2.7.2.7
15:000000000-AVD4R:1:1117:7214:13692_1_243_-	0	0	0	0	2	0	0	0	0	0	0	Bacteria	Bacteroidetes	Bacteroidia	Bacteroidales				Outer membrane protein 40 (Omp40) (PG33)	OmpA family
15:000000000-AVD4R:1:1117:7413:7121_1_348_-	0	0	0	1	0	0	0	0	0	0	0	Bacteria	Bacteroidetes	Bacteroidia	Bacteroidales	Prevotellaceae	Prevotella	Prevotella sp. CAG:485	Outer membrane protein 40 (Omp40) (PG33)	OmpA family
15:000000000-AVD4R:1:1117:7984:3459_1_367_-	1	0	0	0	0	0	0	0	0	0	0	Bacteria	Firmicutes	Clostridia	Clostridiales
15:000000000-AVD4R:1:1117:8813:9685_81_229_+	0	0	0	0	0	0	0	0	1	0	0	Bacteria	Bacteroidetes						30S ribosomal protein S19	Universal ribosomal protein uS19 family	Ribosomal protein S19, bacterial-type	[J] Translation, ribosomal structure and biogenesis		K02965
15:000000000-AVD4R:1:1117:8901:18652_1_281_+	0	2	1	1	1	1	0	1	0	0	0	Bacteria	Bacteroidetes	Bacteroidia	Bacteroidales				Pyruvate-flavodoxin oxidoreductase (EC 1.2.7.-)	NifJ family	Pyruvate-flavodoxin oxidoreductase	[C] Energy production and conversion		K03737	1.2.7.-
15:000000000-AVD4R:1:1117:8904:10442_1_341_-	0	0	0	0	0	0	0	0	0	1	1	Bacteria	Bacteroidetes	Bacteroidia	Bacteroidales
15:000000000-AVD4R:1:1117:9256:8019_1_281_+	0	0	1	0	0	0	0	0	0	0	0	Bacteria	Bacteroidetes	Bacteroidia	Bacteroidales				TonB-dependent receptor SusC (Starch-utilization system protein C)	TonB-dependent receptor family			starch degradation	K21573
15:000000000-AVD4R:1:1117:9357:8765_1_209_-	1	1	1	1	1	1	1	1	3	1	1	Bacteria	Bacteroidetes	Bacteroidia	Bacteroidales				Elongation factor G (EF-G)	TRAFAC class translation factor GTPase superfamily, Classic translation factor GTPase family, EF-G/EF-2 subfamily	Translation elongation factor EFG/EF2	[J] Translation, ribosomal structure and biogenesis		K02355
15:000000000-AVD4R:1:1117:9613:10299_1_300_+	0	0	0	1	0	0	2	0	0	0	0
15:000000000-AVD4R:1:1117:9923:14286_1_358_+	2	1	0	0	1	0	0	1	0	0	1	Bacteria							NADP-specific glutamate dehydrogenase (NADP-GDH) (EC 1.4.1.4)	Glu/Leu/Phe/Val dehydrogenases family	Glutamate dehydrogenase	[E] Amino acid transport and metabolism		K00262	1.4.1.4
15:000000000-AVD4R:1:1118:10147:9239_1_258_-	1	0	0	0	0	0	0	0	0	0	0	Bacteria	Firmicutes
15:000000000-AVD4R:1:1118:10343:15451_1_299_+	0	0	0	0	0	0	0	0	1	0	0	Bacteria	Bacteroidetes	Bacteroidia
15:000000000-AVD4R:1:1118:10506:22753_1_261_+	1	0	0	0	0	0	0	0	0	0	0	Bacteria	Firmicutes								Fagellar hook-basal body protein, FlgE/F/G	[N] Cell motility
15:000000000-AVD4R:1:1118:10530:16430_94_353_-	0	0	1	0	0	0	0	0	1	0	0	Bacteria	Bacteroidetes	Bacteroidia	Bacteroidales							[M] Cell wall/membrane/envelope biogenesis
15:000000000-AVD4R:1:1118:10770:15718_1_302_-	0	0	0	0	0	0	0	0	1	0	0	Bacteria	Bacteroidetes	Bacteroidia	Bacteroidales	Prevotellaceae	Prevotella				Glycoside hydrolase, family 13
15:000000000-AVD4R:1:1118:10792:5209_1_236_+	0	0	0	0	0	1	1	0	1	0	0	Bacteria
15:000000000-AVD4R:1:1118:11660:7779_1_211_+	0	0	0	1	1	0	0	0	0	0	0	Bacteria	Bacteroidetes	Bacteroidia	Bacteroidales
15:000000000-AVD4R:1:1118:11736:7996_1_311_+	1	0	0	0	0	0	0	0	0	0	0	Bacteria	Firmicutes	Clostridia	Clostridiales	Eubacteriaceae			Chaperone protein DnaK (HSP70) (Heat shock 70 kDa protein) (Heat shock protein 70)	Heat shock protein 70 family	Heat shock protein 70 family	[O] Posttranslational modification, protein turnover, chaperones		K04043
15:000000000-AVD4R:1:1118:12129:7235_1_381_+	0	0	0	0	0	0	1	0	1	0	0	Bacteria	Bacteroidetes	Bacteroidia	Bacteroidales							[V] Defense mechanisms
15:000000000-AVD4R:1:1118:12993:7220_1_280_+	1	0	0	0	0	0	0	3	0	0	0
15:000000000-AVD4R:1:1118:13389:14799_1_334_-	0	0	0	0	0	0	0	0	1	0	0	Bacteria	Bacteroidetes	Bacteroidia	Bacteroidales				Outer membrane protein 40 (Omp40) (PG33)	OmpA family		[M] Cell wall/membrane/envelope biogenesis
15:000000000-AVD4R:1:1118:13490:6440_1_287_+	0	0	0	0	0	0	0	0	1	0	0	Bacteria	Firmicutes	Clostridia	Clostridiales	Ruminococcaceae	Ruminococcus	Ruminococcus flavefaciens			Twin-arginine translocation protein TatB
15:000000000-AVD4R:1:1118:14181:5262_1_247_+	1	0	0	0	0	0	0	0	0	0	0	Bacteria	Firmicutes	Clostridia	Clostridiales	Clostridiaceae	Clostridium		LL-diaminopimelate aminotransferase (DAP-AT) (DAP-aminotransferase) (LL-DAP-aminotransferase) (EC 2.6.1.83)	Class-I pyridoxal-phosphate-dependent aminotransferase family, LL-diaminopimelate aminotransferase subfamily	LL-diaminopimelate aminotransferase	[E] Amino acid transport and metabolism	L-lysine biosynthesis via DAP pathway	K10206	2.6.1.83
15:000000000-AVD4R:1:1118:14534:11187_1_220_+	0	0	0	2	1	2	0	5	0	0	1	Bacteria	Firmicutes	Clostridia	Clostridiales
15:000000000-AVD4R:1:1118:14611:15901_1_351_+	0	0	1	3	2	0	2	0	0	0	0	Bacteria	Bacteroidetes	Bacteroidia	Bacteroidales							[P] Inorganic ion transport and metabolism
15:000000000-AVD4R:1:1118:15167:10916_1_326_-	1	1	0	0	0	0	0	0	0	1	1	Bacteria	Firmicutes	Clostridia	Clostridiales	Eubacteriaceae	Eubacterium		Elongation factor Tu (EF-Tu)	TRAFAC class translation factor GTPase superfamily, Classic translation factor GTPase family, EF-Tu/EF-1A subfamily	Translation elongation factor EFTu/EF1A, bacterial/organelle	[J] Translation, ribosomal structure and biogenesis		K02358
15:000000000-AVD4R:1:1118:16202:10786_31_338_-	1	1	0	0	0	0	0	0	0	0	0	Bacteria	Bacteroidetes	Bacteroidia	Bacteroidales				L-methionine gamma-lyase (MGL) (EC 4.4.1.11) (Homocysteine desulfhydrase) (EC 4.4.1.2) (L-methionine-alpha-deamino-gamma-mercaptomethane-lyase) (METase)	Trans-sulfuration enzymes family, L-methionine gamma-lyase subfamily	O-acetylhomoserine/O-acetylserine sulfhydrylase	[E] Amino acid transport and metabolism			4.4.1.11
15:000000000-AVD4R:1:1118:16727:5410_1_275_+	0	0	0	0	0	0	0	0	0	1	0	Bacteria	Bacteroidetes	Bacteroidia	Bacteroidales				Dipeptidyl-peptidase 5 (DPP5) (EC 3.4.14.-) (MER034615)	Peptidase S9C family					3.4.14.-
15:000000000-AVD4R:1:1118:16841:12023_1_286_-	0	0	0	0	0	1	1	0	0	0	0	Bacteria	Bacteroidetes	Bacteroidia	Bacteroidales	Bacteroidaceae
15:000000000-AVD4R:1:1118:17285:3424_1_303_+	0	0	0	0	1	0	0	0	0	0	0	Bacteria	Bacteroidetes	Bacteroidia	Bacteroidales				3-oxoacyl-[acyl-carrier-protein] reductase FabG (EC 1.1.1.100) (3-ketoacyl-acyl carrier protein reductase) (Beta-Ketoacyl-acyl carrier protein reductase) (Beta-ketoacyl-ACP reductase)	Short-chain dehydrogenases/reductases (SDR) family	3-oxoacyl-(acyl-carrier-protein) reductase		fatty acid biosynthesis	K00059	1.1.1.100
15:000000000-AVD4R:1:1118:17686:7301_1_286_+	0	0	0	0	1	0	0	0	0	0	0	Bacteria	Bacteroidetes	Bacteroidia	Bacteroidales
15:000000000-AVD4R:1:1118:17874:16730_1_133_-	1	1	0	1	0	1	0	1	0	1	1	Eukaryota	Chordata	Mammalia								[E] Amino acid transport and metabolism
15:000000000-AVD4R:1:1118:17921:12128_1_306_+	0	0	0	1	0	0	0	0	0	0	0	Bacteria	Firmicutes	Clostridia	Clostridiales				L-fucose isomerase (EC 5.3.1.25) (6-deoxy-L-galactose isomerase) (FucIase)	L-fucose isomerase family	L-fucose isomerase	[G] Carbohydrate transport and metabolism	L-fucose degradation	K01818	5.3.1.25
15:000000000-AVD4R:1:1118:18349:16971_1_353_-	0	0	0	0	1	3	4	0	0	0	0	Bacteria	Bacteroidetes	Bacteroidia	Bacteroidales				Glucose-6-phosphate isomerase (GPI) (EC 5.3.1.9) (Phosphoglucose isomerase) (PGI) (Phosphohexose isomerase) (PHI)	GPI family	Phosphoglucose isomerase (PGI)		gluconeogenesis	K01810	5.3.1.9
15:000000000-AVD4R:1:1118:19403:4363_1_250_+	0	0	0	0	0	1	1	0	0	0	0	Bacteria	Bacteroidetes	Bacteroidia	Bacteroidales				DNA-directed RNA polymerase subunit beta (RNAP subunit beta) (EC 2.7.7.6) (RNA polymerase subunit beta) (Transcriptase subunit beta)	RNA polymerase beta chain family	DNA-directed RNA polymerase, subunit 2	[K] Transcription		K03043	2.7.7.6
15:000000000-AVD4R:1:1118:19778:23690_1_255_-	0	0	0	0	1	0	0	1	0	0	0	Bacteria	Firmicutes	Clostridia	Clostridiales							[G] Carbohydrate transport and metabolism
15:000000000-AVD4R:1:1118:20370:11058_1_330_-	0	0	0	0	0	0	0	0	0	0	1	Bacteria	Firmicutes	Clostridia	Clostridiales	Eubacteriaceae	Eubacterium					[G] Carbohydrate transport and metabolism
15:000000000-AVD4R:1:1118:22107:12431_1_323_-	1	1	0	0	0	0	0	0	1	0	0
15:000000000-AVD4R:1:1118:23566:8411_1_315_+	0	0	1	0	0	0	0	0	0	0	0	Bacteria							Phosphoenolpyruvate carboxykinase (ATP) (PCK) (PEP carboxykinase) (PEPCK) (EC 4.1.1.49)	Phosphoenolpyruvate carboxykinase (ATP) family	Phosphoenolpyruvate carboxykinase, ATP-utilising	[C] Energy production and conversion	gluconeogenesis	K01610	4.1.1.49
15:000000000-AVD4R:1:1118:24197:19750_1_310_-	0	1	0	0	0	0	0	0	0	0	0	Bacteria	Bacteroidetes	Bacteroidia	Bacteroidales				Glycosyl hydrolase family 109 protein 5 (EC 3.2.1.-)	Gfo/Idh/MocA family, Glycosyl hydrolase 109 subfamily					3.2.1.-
15:000000000-AVD4R:1:1118:24225:16350_1_219_+	1	0	1	0	1	0	0	0	0	0	0											[P] Inorganic ion transport and metabolism
15:000000000-AVD4R:1:1118:24550:19580_130_335_+	0	0	0	0	0	0	1	0	0	0	0	Bacteria	Firmicutes						Flagellin (Fragment)	Bacterial flagellin family	Flagellin
15:000000000-AVD4R:1:1118:24695:14103_1_241_-	2	2	2	1	2	0	2	0	0	1	0
15:000000000-AVD4R:1:1118:24818:14579_23_311_-	0	0	0	0	1	0	0	1	0	0	0
15:000000000-AVD4R:1:1118:25044:7734_1_274_-	1	1	0	1	1	1	1	1	1	2	1	Bacteria	Firmicutes						50S ribosomal protein L15	Universal ribosomal protein uL15 family		[J] Translation, ribosomal structure and biogenesis		K02876
15:000000000-AVD4R:1:1118:25334:16677_1_249_-	0	0	0	0	0	1	0	0	0	0	0	Bacteria	Bacteroidetes								Glycoside hydrolase, family 77	[G] Carbohydrate transport and metabolism
15:000000000-AVD4R:1:1118:25382:8046_1_250_+	0	0	0	0	1	0	0	0	0	0	0	Bacteria	Bacteroidetes	Bacteroidia	Bacteroidales				ATP synthase subunit alpha (EC 3.6.3.14) (ATP synthase F1 sector subunit alpha) (F-ATPase subunit alpha)	ATPase alpha/beta chains family		[C] Energy production and conversion		K02111	3.6.3.14
15:000000000-AVD4R:1:1118:25705:19692_1_333_-	0	0	0	0	0	0	0	0	0	0	1	Bacteria	Bacteroidetes	Bacteroidia	Bacteroidales				50S ribosomal protein L5	Universal ribosomal protein uL5 family	Ribosomal protein L5, bacterial-type	[J] Translation, ribosomal structure and biogenesis		K02931
15:000000000-AVD4R:1:1118:25884:10166_1_298_-	0	1	0	1	0	0	0	0	0	0	1	Bacteria	Firmicutes	Clostridia	Clostridiales				ATP-dependent 6-phosphofructokinase (ATP-PFK) (Phosphofructokinase) (EC 2.7.1.11) (Phosphohexokinase)	Phosphofructokinase type A (PFKA) family, Mixed-substrate PFK group III subfamily	ATP-dependent 6-phosphofructokinase	[G] Carbohydrate transport and metabolism	glycolysis	K21071	2.7.1.11
15:000000000-AVD4R:1:1118:25888:4110_1_279_-	1	0	0	0	0	0	0	0	0	0	0	Bacteria	Bacteroidetes	Bacteroidia	Bacteroidales	Odoribacteraceae	Odoribacter					[O] Posttranslational modification, protein turnover, chaperones
15:000000000-AVD4R:1:1118:26109:6777_1_282_+	0	0	0	2	0	0	0	0	0	0	0
15:000000000-AVD4R:1:1118:26333:14148_1_240_+	0	0	0	0	0	0	0	0	0	0	1	Bacteria	Firmicutes									[E] Amino acid transport and metabolism
15:000000000-AVD4R:1:1118:26347:18029_5_376_+	0	1	0	0	0	0	0	0	0	1	0	Bacteria	Firmicutes	Clostridia	Clostridiales				Valine--tRNA ligase (EC 6.1.1.9) (Valyl-tRNA synthetase) (ValRS)	Class-I aminoacyl-tRNA synthetase family, ValS type 1 subfamily	Valine-tRNA ligase	[J] Translation, ribosomal structure and biogenesis		K01873	6.1.1.9
15:000000000-AVD4R:1:1118:27520:9218_1_214_+	1	0	0	0	0	0	0	0	0	1	0	Bacteria	Firmicutes	Clostridia	Clostridiales				Ketol-acid reductoisomerase (NADP(+)) (KARI) (EC 1.1.1.86) (Acetohydroxy-acid isomeroreductase) (AHIR) (Alpha-keto-beta-hydroxylacyl reductoisomerase) (Ketol-acid reductoisomerase type 1) (Ketol-acid reductoisomerase type I)	Ketol-acid reductoisomerase family		[E] Amino acid transport and metabolism	L-isoleucine biosynthesis	K00053	1.1.1.86
15:000000000-AVD4R:1:1118:27635:16127_103_250_-	2	1	0	0	0	0	0	2	0	3	1	Bacteria	Firmicutes									[G] Carbohydrate transport and metabolism
15:000000000-AVD4R:1:1118:28313:18005_1_332_-	0	0	0	0	0	1	0	0	1	0	0	Bacteria	Bacteroidetes	Bacteroidia	Bacteroidales				3-oxoacyl-[acyl-carrier-protein] synthase 2 (EC 2.3.1.179) (3-oxoacyl-[acyl-carrier-protein] synthase II) (Beta-ketoacyl-ACP synthase II) (KAS II) (Fragment)	Beta-ketoacyl-ACP synthases family	3-oxoacyl-[acyl-carrier-protein] synthase 2	[I] Lipid transport and metabolism	fatty acid biosynthesis		2.3.1.179
15:000000000-AVD4R:1:1118:28742:14972_1_237_-	0	0	1	1	0	0	0	0	0	0	0
15:000000000-AVD4R:1:1118:29476:12707_1_256_+	0	0	0	0	0	0	1	0	0	0	0	Bacteria	Bacteroidetes	Bacteroidia	Bacteroidales
15:000000000-AVD4R:1:1118:7123:17036_1_255_-	1	1	0	0	0	0	0	0	0	1	0	Bacteria	Firmicutes						Pyruvate synthase (EC 1.2.7.1) (Pyruvate-ferredoxin oxidoreductase) (POR)		Pyruvate-flavodoxin oxidoreductase	[C] Energy production and conversion			1.2.7.1
15:000000000-AVD4R:1:1118:7268:5642_9_263_+	0	0	0	0	0	0	0	0	0	0	1	Bacteria	Firmicutes	Clostridia	Clostridiales				Putative sensory transducer protein		Chemotaxis methyl-accepting receptor			K03406
15:000000000-AVD4R:1:1118:7368:6838_1_259_+	0	0	0	0	0	0	0	0	1	0	0	Bacteria	Bacteroidetes	Bacteroidia	Bacteroidales				Pyruvate, phosphate dikinase (EC 2.7.9.1) (Pyruvate, orthophosphate dikinase)	PEP-utilizing enzyme family	Pyruvate, phosphate dikinase	[G] Carbohydrate transport and metabolism			2.7.9.1
15:000000000-AVD4R:1:1118:7726:4286_1_216_+	1	0	0	0	1	0	0	0	2	0	0	Bacteria	Bacteroidetes	Bacteroidia	Bacteroidales	Prevotellaceae	Prevotella				Alpha-glucan phosphorylase	[G] Carbohydrate transport and metabolism
15:000000000-AVD4R:1:1118:8626:4701_1_311_-	0	1	0	0	0	0	0	0	0	0	0	Bacteria	Bacteroidetes	Bacteroidia	Bacteroidales
15:000000000-AVD4R:1:1118:9050:5403_1_207_-	0	1	0	0	2	1	1	0	1	0	0	Bacteria	Bacteroidetes	Bacteroidia	Bacteroidales							[C] Energy production and conversion
15:000000000-AVD4R:1:1118:9125:22555_1_208_-	1	0	0	0	0	0	0	0	0	0	0
15:000000000-AVD4R:1:1118:9426:18392_1_220_-	0	0	1	0	0	0	0	0	0	0	1	Bacteria	Firmicutes	Clostridia	Clostridiales
15:000000000-AVD4R:1:1119:10851:6468_1_287_-	0	0	0	0	0	0	0	0	0	4	3	Bacteria	Bacteroidetes	Bacteroidia	Bacteroidales
15:000000000-AVD4R:1:1119:10901:15833_1_333_+	0	0	0	0	0	0	0	0	0	0	1
15:000000000-AVD4R:1:1119:10951:13332_1_377_+	0	0	0	0	0	0	0	0	1	0	0	Bacteria	Bacteroidetes	Bacteroidia	Bacteroidales				Malate dehydrogenase (EC 1.1.1.37)	LDH/MDH superfamily, MDH type 3 family	Malate dehydrogenase, type 3	[C] Energy production and conversion		K00024	1.1.1.37
15:000000000-AVD4R:1:1119:11088:2135_1_308_-	0	0	0	1	0	0	0	0	1	0	0
15:000000000-AVD4R:1:1119:11770:10044_1_266_+	0	0	0	0	0	0	0	0	1	0	0	Bacteria	Bacteroidetes	Bacteroidia	Bacteroidales	Prevotellaceae	Prevotella	Prevotella ruminicola	TonB-dependent receptor SusC (Starch-utilization system protein C)	TonB-dependent receptor family		[P] Inorganic ion transport and metabolism	starch degradation	K21573
15:000000000-AVD4R:1:1119:12094:13909_1_306_+	0	0	0	0	0	0	0	0	0	0	1	Bacteria	Firmicutes									[G] Carbohydrate transport and metabolism
15:000000000-AVD4R:1:1119:12494:12844_1_225_-	0	0	0	0	0	0	0	0	0	1	0
15:000000000-AVD4R:1:1119:12668:8360_228_376_-	0	0	0	0	0	0	0	0	1	0	0	Bacteria	Bacteroidetes	Bacteroidia	Bacteroidales			Bacteroidales bacterium 52_46			Thioredoxin
15:000000000-AVD4R:1:1119:13373:14074_1_297_+	0	1	0	0	1	0	0	0	0	1	0	Bacteria	Bacteroidetes	Bacteroidia	Bacteroidales				Propionyl-CoA carboxylase beta chain (PCCase) (EC 6.4.1.3) (Propanoyl-CoA:carbon dioxide ligase)	AccD/PCCB family		[I] Lipid transport and metabolism	propanoyl-CoA degradation	K01966	6.4.1.3
15:000000000-AVD4R:1:1119:13791:16262_1_243_-	1	1	0	1	1	1	1	1	1	1	0	Bacteria	Bacteroidetes	Bacteroidia	Bacteroidales	Bacteroidaceae	Bacteroides	Bacteroides sp. CAG:927	Putative glucosamine-6-phosphate deaminase-like protein BT_0258	Glucosamine/galactosamine-6-phosphate isomerase family, NagB subfamily	Glucosamine-6-phosphate isomerase	[G] Carbohydrate transport and metabolism		K02564
15:000000000-AVD4R:1:1119:14771:20613_42_230_+	0	1	1	1	0	1	0	1	0	0	0	Bacteria	Bacteroidetes	Bacteroidia	Bacteroidales				Malate dehydrogenase (EC 1.1.1.37)	LDH/MDH superfamily, MDH type 3 family	Malate dehydrogenase, type 3	[C] Energy production and conversion		K00024	1.1.1.37
15:000000000-AVD4R:1:1119:15564:13781_1_353_-	0	0	0	0	0	0	0	0	2	0	0
15:000000000-AVD4R:1:1119:15658:16468_151_358_+	0	0	0	0	0	0	0	0	0	1	0
15:000000000-AVD4R:1:1119:16059:9096_1_240_+	0	0	0	0	0	0	0	0	0	0	2	Bacteria	Firmicutes						ATP synthase subunit beta (EC 3.6.3.14) (ATP synthase F1 sector subunit beta) (F-ATPase subunit beta)	ATPase alpha/beta chains family	ATPase, F1 complex, beta subunit	[C] Energy production and conversion		K02112	3.6.3.14
15:000000000-AVD4R:1:1119:16177:21537_1_281_+	2	0	0	1	2	5	5	2	0	0	0	Bacteria	Bacteroidetes	Bacteroidia	Bacteroidales	Prevotellaceae	Prevotella	Prevotella sp. CAG:485	Outer membrane protein 40 (Omp40) (PG33)	OmpA family		[M] Cell wall/membrane/envelope biogenesis
15:000000000-AVD4R:1:1119:16720:12126_1_235_+	0	0	0	0	0	0	0	0	0	1	1	Bacteria	Bacteroidetes						TonB-dependent receptor SusC (Starch-utilization system protein C)	TonB-dependent receptor family			starch degradation	K21573
15:000000000-AVD4R:1:1119:17314:13812_1_212_-	1	1	1	1	1	1	1	1	1	1	1	Bacteria	Bacteroidetes	Bacteroidia	Bacteroidales							[P] Inorganic ion transport and metabolism
15:000000000-AVD4R:1:1119:17417:20332_1_373_+	0	0	0	0	0	0	0	0	0	1	1	Bacteria	Bacteroidetes	Bacteroidia	Bacteroidales	Prevotellaceae	Prevotella	Prevotella sp. CAG:1058
15:000000000-AVD4R:1:1119:18193:11167_1_267_-	0	2	0	0	0	0	0	0	0	0	0	Bacteria							Phosphoenolpyruvate carboxykinase (ATP) (PCK) (PEP carboxykinase) (PEPCK) (EC 4.1.1.49)	Phosphoenolpyruvate carboxykinase (ATP) family	Phosphoenolpyruvate carboxykinase, ATP-utilising	[C] Energy production and conversion	gluconeogenesis		4.1.1.49
15:000000000-AVD4R:1:1119:18942:8879_1_297_-	0	0	1	0	0	0	0	0	0	0	0
15:000000000-AVD4R:1:1119:19329:7747_1_265_-	0	0	1	2	2	1	2	2	1	1	1
15:000000000-AVD4R:1:1119:19637:20775_1_331_-	0	0	0	0	1	0	0	0	0	0	0	Bacteria	Bacteroidetes	Bacteroidia	Bacteroidales	Prevotellaceae	Prevotella	Prevotella sp. CAG:485			Protein-export membrane protein SecD/SecF, archaeal and bacterial	[U] Intracellular trafficking, secretion, and vesicular transport
15:000000000-AVD4R:1:1119:19752:10411_1_245_+	0	0	0	0	0	0	0	0	0	1	1	Bacteria	Firmicutes	Clostridia	Clostridiales	Clostridiaceae	Clostridium	Clostridium sp. KNHs209			Chemotaxis methyl-accepting receptor
15:000000000-AVD4R:1:1119:20622:14151_1_215_+	0	0	0	0	0	0	1	0	0	0	0	Bacteria	Bacteroidetes	Bacteroidia	Bacteroidales	Prevotellaceae			Uncharacterized protein YbhJ	Aconitase/IPM isomerase family		[C] Energy production and conversion		K01681
15:000000000-AVD4R:1:1119:20667:12401_1_291_-	0	0	0	0	0	2	1	0	0	0	0	Bacteria	Bacteroidetes	Bacteroidia	Bacteroidales				Purine nucleoside phosphorylase 1 (PNP 1) (EC 2.4.2.1) (Inosine phosphorylase) (Inosine-guanosine phosphorylase) (Purine nucleoside phosphorylase I) (PNP I) (Pu-NPase I)	PNP/MTAP phosphorylase family		[F] Nucleotide transport and metabolism	purine nucleoside salvage	K03783	2.4.2.1
15:000000000-AVD4R:1:1119:21670:20411_1_257_-	1	1	0	1	0	0	0	1	0	1	0	Bacteria	Firmicutes						Aldehyde-alcohol dehydrogenase [Includes: Alcohol dehydrogenase (ADH) (EC 1.1.1.1); Acetaldehyde dehydrogenase [acetylating] (ACDH) (EC 1.2.1.10); Pyruvate-formate-lyase deactivase (PFL deactivase)]	Aldehyde dehydrogenase family	Bifunctional aldehyde-alcohol dehydrogenase	[C] Energy production and conversion		K04072	1.1.1.1
15:000000000-AVD4R:1:1119:2284:10064_1_253_-	2	2	3	1	3	5	3	3	3	1	1	Bacteria	Bacteroidetes	Bacteroidia	Bacteroidales	Prevotellaceae	Prevotella	Prevotella timonensis				[P] Inorganic ion transport and metabolism
15:000000000-AVD4R:1:1119:23691:22622_1_207_-	3	2	0	0	0	0	0	0	0	3	0
15:000000000-AVD4R:1:1119:23939:5731_1_215_-	0	1	0	1	0	0	1	0	0	0	0	Bacteria							Glyceraldehyde-3-phosphate dehydrogenase A (GAPDH-A) (EC 1.2.1.12) (NAD-dependent glyceraldehyde-3-phosphate dehydrogenase)	Glyceraldehyde-3-phosphate dehydrogenase family	Glyceraldehyde/Erythrose phosphate dehydrogenase family	[G] Carbohydrate transport and metabolism	glycolysis	K00134	1.2.1.12
15:000000000-AVD4R:1:1119:24367:12938_1_330_+	0	0	0	0	0	0	0	0	0	0	2	Bacteria	Bacteroidetes	Bacteroidia	Bacteroidales				Chaperone SurA (Peptidyl-prolyl cis-trans isomerase SurA) (PPIase SurA) (EC 5.2.1.8) (Rotamase SurA)					K03771	5.2.1.8
15:000000000-AVD4R:1:1119:24609:9210_1_217_-	0	0	0	0	0	1	1	1	0	0	0	Bacteria	Bacteroidetes	Bacteroidia	Bacteroidales	Prevotellaceae	Prevotella	Prevotella sp. CAG:1031
15:000000000-AVD4R:1:1119:24740:15701_1_236_+	2	3	2	1	2	2	2	2	2	6	4	Bacteria	Firmicutes	Clostridia	Clostridiales	Clostridiaceae	Clostridium		Flagellar filament 31.3 kDa core protein (Flagellin subunit protein B2)	Bacterial flagellin family	Flagellin	[N] Cell motility
15:000000000-AVD4R:1:1119:25089:10606_1_215_-	2	1	1	0	0	1	1	1	0	1	0	Bacteria	Bacteroidetes	Bacteroidia	Bacteroidales				TonB-dependent receptor SusC (Starch-utilization system protein C)	TonB-dependent receptor family			starch degradation	K21573
15:000000000-AVD4R:1:1119:25218:8825_1_246_+	0	0	0	0	0	0	1	1	0	0	0	Bacteria	Bacteroidetes
15:000000000-AVD4R:1:1119:25325:17149_1_181_+	0	0	0	1	0	0	0	0	0	0	0	Bacteria	Firmicutes	Clostridia	Clostridiales						N5-carboxyaminoimidazole ribonucleotide mutase PurE	[F] Nucleotide transport and metabolism
15:000000000-AVD4R:1:1119:25620:10713_1_333_-	0	0	0	0	2	0	0	0	0	0	0											[I] Lipid transport and metabolism
15:000000000-AVD4R:1:1119:26186:20095_1_301_-	0	0	1	0	4	0	0	0	3	0	1	Bacteria	Bacteroidetes	Bacteroidia								[M] Cell wall/membrane/envelope biogenesis
15:000000000-AVD4R:1:1119:26472:6091_174_373_-	1	0	0	0	0	1	1	1	0	0	0	Bacteria	Firmicutes	Clostridia	Clostridiales	Clostridiaceae	Clostridium
15:000000000-AVD4R:1:1119:26883:6197_1_216_+	0	0	0	0	0	1	1	0	0	0	0	Bacteria	Firmicutes	Clostridia	Clostridiales	Lachnospiraceae	Coprococcus	Coprococcus catus	Acetate CoA-transferase YdiF (EC 2.8.3.8) (Short-chain acyl-CoA:acetate CoA-transferase)	3-oxoacid CoA-transferase family	3-oxoacid CoA-transferase	[I] Lipid transport and metabolism		K19709	2.8.3.8
15:000000000-AVD4R:1:1119:27098:11266_1_200_+	0	0	1	0	0	0	0	0	0	0	0	Bacteria	Bacteroidetes	Bacteroidia	Bacteroidales	Bacteroidaceae	Bacteroides	Bacteroides sp. CAG:927			Ribosomal protein S30Ae/sigma 54 modulation protein
15:000000000-AVD4R:1:1119:27691:11607_1_207_+	1	0	0	0	0	0	0	1	0	0	0	Bacteria	Firmicutes									[E] Amino acid transport and metabolism
15:000000000-AVD4R:1:1119:4746:16321_1_368_-	0	0	1	1	0	0	0	0	0	0	0
15:000000000-AVD4R:1:1119:5482:15740_1_222_-	0	0	0	0	1	0	0	0	0	0	0
15:000000000-AVD4R:1:1119:5550:16219_4_207_-	0	0	1	1	1	1	0	0	0	0	0	Bacteria	Bacteroidetes								Ribonucleotide reductase, adenosylcobalamin-dependent	[F] Nucleotide transport and metabolism
15:000000000-AVD4R:1:1119:6248:12664_1_255_+	0	0	0	0	0	1	0	0	0	1	0	Bacteria	Firmicutes	Clostridia	Clostridiales	Ruminococcaceae	Ruminiclostridium
15:000000000-AVD4R:1:1119:6441:3773_1_273_-	2	3	1	2	2	3	2	1	1	2	1	Bacteria	Bacteroidetes	Bacteroidia	Bacteroidales							[P] Inorganic ion transport and metabolism
15:000000000-AVD4R:1:1119:8205:16978_1_217_+	0	2	0	0	0	0	0	1	1	0	0
15:000000000-AVD4R:1:1119:8424:15044_1_303_+	0	0	0	0	0	0	0	0	1	0	0	Bacteria	Bacteroidetes	Bacteroidia	Bacteroidales	Prevotellaceae	Prevotella				Glycoside hydrolase, family 13
15:000000000-AVD4R:1:1119:9498:5269_1_229_-	0	0	0	0	0	1	0	0	1	0	0
15:000000000-AVD4R:1:2101:10287:22390_1_298_+	0	0	0	0	0	0	0	0	2	0	0	Bacteria	Bacteroidetes						Transketolase 2 (TK 2) (EC 2.2.1.1)	Transketolase family				K00615	2.2.1.1
15:000000000-AVD4R:1:2101:10602:14386_1_216_+	0	0	1	2	2	1	0	0	0	0	0	Bacteria	Bacteroidetes
15:000000000-AVD4R:1:2101:10904:9375_1_228_-	0	0	0	0	0	0	0	0	1	0	0	Bacteria	Bacteroidetes	Bacteroidia	Bacteroidales				Phosphate acetyltransferase (EC 2.3.1.8) (Phosphotransacetylase)	Phosphate acetyltransferase and butyryltransferase family			acetyl-CoA biosynthesis	K00625	2.3.1.8
15:000000000-AVD4R:1:2101:11761:13134_1_229_+	0	0	0	0	1	0	0	0	0	0	0	Bacteria	Bacteroidetes
15:000000000-AVD4R:1:2101:12013:10100_1_312_+	0	0	2	1	1	2	0	0	0	0	0	Bacteria	Bacteroidetes	Bacteroidia					TonB-dependent receptor SusC (Starch-utilization system protein C)	TonB-dependent receptor family		[P] Inorganic ion transport and metabolism	starch degradation	K21573
15:000000000-AVD4R:1:2101:12933:22173_1_355_-	1	1	0	0	0	1	1	1	3	0	0
15:000000000-AVD4R:1:2101:13669:4826_1_317_+	0	0	2	5	5	2	3	7	2	3	3
15:000000000-AVD4R:1:2101:15443:20848_1_291_-	0	0	0	0	0	0	0	0	0	0	1	Bacteria	Firmicutes	Clostridia	Clostridiales	Lachnospiraceae			Methyl-accepting chemotaxis protein McpB (H3)					K03406
15:000000000-AVD4R:1:2101:16042:22079_1_324_+	0	0	0	0	0	0	0	1	0	0	0	Bacteria	Firmicutes						Xylulose kinase (Xylulokinase) (EC 2.7.1.17)	FGGY kinase family	Xylulokinase			K00854	2.7.1.17
15:000000000-AVD4R:1:2101:16337:10883_1_261_+	0	0	0	0	0	1	1	1	0	0	0
15:000000000-AVD4R:1:2101:17495:2698_1_319_-	5	1	0	0	0	0	0	0	0	0	0
15:000000000-AVD4R:1:2101:18342:13478_1_299_-	1	0	0	0	1	0	0	0	0	0	0	Bacteria	Firmicutes	Clostridia	Clostridiales				Phosphoenolpyruvate carboxykinase (ATP) (PCK) (PEP carboxykinase) (PEPCK) (EC 4.1.1.49)	Phosphoenolpyruvate carboxykinase (ATP) family	Phosphoenolpyruvate carboxykinase, ATP-utilising	[C] Energy production and conversion	gluconeogenesis	K01610	4.1.1.49
15:000000000-AVD4R:1:2101:18397:5877_1_367_+	0	0	0	0	0	0	0	0	1	0	0	Bacteria	Bacteroidetes	Bacteroidia	Bacteroidales
15:000000000-AVD4R:1:2101:18397:5932_1_323_+	1	1	1	1	1	1	1	1	1	1	0	Bacteria										[C] Energy production and conversion
15:000000000-AVD4R:1:2101:18533:6732_1_305_+	1	1	0	0	0	0	0	1	0	1	0	Bacteria	Firmicutes						Probable butyrate kinase (BK) (EC 2.7.2.7) (Branched-chain carboxylic acid kinase)	Acetokinase family	Butyrate kinase	[C] Energy production and conversion		K00929	2.7.2.7
15:000000000-AVD4R:1:2101:19342:1974_124_310_+	0	0	1	0	0	0	0	0	1	0	0	Eukaryota	Chordata	Mammalia					Biotin carboxylase 2 (EC 6.3.4.14) (Acetyl-CoA carboxylase subunit A 2) (ACC 2) (EC 6.4.1.2)			[I] Lipid transport and metabolism	malonyl-CoA biosynthesis	K01961	6.3.4.14
15:000000000-AVD4R:1:2101:19536:6506_1_209_-	0	0	0	0	0	0	0	0	0	1	4	Bacteria	Firmicutes									[G] Carbohydrate transport and metabolism
15:000000000-AVD4R:1:2101:19735:22629_1_274_+	0	1	1	1	0	0	0	0	0	0	0	Bacteria	Firmicutes	Clostridia	Clostridiales	Eubacteriaceae	Eubacterium
15:000000000-AVD4R:1:2101:19922:3699_1_303_-	1	1	0	0	0	0	0	0	1	1	0
15:000000000-AVD4R:1:2101:2008:12232_1_218_+	0	0	0	0	1	0	0	0	0	0	0
15:000000000-AVD4R:1:2101:20713:22073_1_228_+	0	0	0	0	0	0	0	0	1	0	0
15:000000000-AVD4R:1:2101:20985:19747_1_222_+	0	0	0	0	0	0	0	0	3	0	0	Bacteria	Bacteroidetes	Bacteroidia	Bacteroidales
15:000000000-AVD4R:1:2101:21110:20586_1_298_-	0	0	0	0	0	0	0	0	1	0	0	Bacteria									Peptide/nickel binding protein, MppA-type
15:000000000-AVD4R:1:2101:21798:16822_1_321_-	1	1	1	1	0	0	0	0	1	0	0
15:000000000-AVD4R:1:2101:22900:15118_1_222_-	1	0	0	0	0	0	0	0	0	0	0	Bacteria	Firmicutes					Firmicutes bacterium CAG:882
15:000000000-AVD4R:1:2101:24302:11249_1_154_+	1	0	0	0	0	0	0	0	0	0	0	Bacteria	Firmicutes	Clostridia	Clostridiales
15:000000000-AVD4R:1:2101:24310:20045_1_344_-	2	0	1	0	0	0	0	0	0	0	0	Bacteria	Proteobacteria	Deltaproteobacteria	Desulfovibrionales	Desulfovibrionaceae	Bilophila
15:000000000-AVD4R:1:2101:27141:13695_1_325_+	0	0	0	1	0	0	0	0	0	0	0	Bacteria	Firmicutes	Clostridia	Clostridiales	Lachnospiraceae			Putative sensory transducer protein		Chemotaxis methyl-accepting receptor			K03406
15:000000000-AVD4R:1:2101:27162:14561_1_350_+	0	0	0	0	0	0	1	1	1	0	0	Bacteria	Bacteroidetes	Bacteroidia	Bacteroidales
15:000000000-AVD4R:1:2101:28507:11767_1_286_+	0	1	0	1	0	0	0	0	0	0	0	Bacteria	Bacteroidetes	Bacteroidia	Bacteroidales	Prevotellaceae	Prevotella
15:000000000-AVD4R:1:2101:4954:17845_1_217_+	0	0	0	0	0	0	0	1	0	0	0
15:000000000-AVD4R:1:2101:5730:7042_1_216_-	0	1	0	1	0	0	0	0	0	0	0	Bacteria	Bacteroidetes	Bacteroidia	Bacteroidales
15:000000000-AVD4R:1:2101:5956:12720_1_348_+	0	0	0	0	0	0	0	0	2	0	0	Bacteria	Bacteroidetes	Bacteroidia	Bacteroidales				Proline--tRNA ligase (EC 6.1.1.15) (Prolyl-tRNA synthetase) (ProRS)	Class-II aminoacyl-tRNA synthetase family, ProS type 3 subfamily	Proline-tRNA ligase, class IIa, archaeal-type	[J] Translation, ribosomal structure and biogenesis		K01881	6.1.1.15
15:000000000-AVD4R:1:2101:6197:12562_1_209_+	1	0	0	0	0	0	0	0	0	0	0	Bacteria	Firmicutes	Clostridia	Clostridiales	Eubacteriaceae	Eubacterium	Eubacterium sp. CAG:115				[O] Posttranslational modification, protein turnover, chaperones
15:000000000-AVD4R:1:2101:6707:21728_1_215_+	2	0	0	0	0	0	0	0	0	0	1	Bacteria	Firmicutes	Clostridia	Clostridiales	Lachnospiraceae					Peptide/nickel binding protein, MppA-type
15:000000000-AVD4R:1:2101:7005:9636_67_338_-	1	0	0	0	0	0	0	1	0	1	1	Bacteria	Firmicutes									[G] Carbohydrate transport and metabolism
15:000000000-AVD4R:1:2101:7378:2493_156_342_-	0	0	1	1	0	0	0	0	0	0	0	Bacteria	Bacteroidetes	Bacteroidia	Bacteroidales							[M] Cell wall/membrane/envelope biogenesis
15:000000000-AVD4R:1:2101:7414:4173_1_296_-	1	1	0	0	0	0	0	0	0	1	0
15:000000000-AVD4R:1:2101:7697:17691_1_293_+	0	0	0	0	0	0	0	0	0	0	1	Bacteria	Firmicutes	Clostridia	Clostridiales	Lachnospiraceae	Roseburia	Roseburia sp. CAG:10041_57
15:000000000-AVD4R:1:2101:7789:4718_1_250_-	0	0	0	0	0	0	0	0	1	0	0	Bacteria							Superoxide dismutase [Fe] (EC 1.15.1.1)	Iron/manganese superoxide dismutase family	Manganese/iron superoxide dismutase	[P] Inorganic ion transport and metabolism		K04564	1.15.1.1
15:000000000-AVD4R:1:2101:8703:19836_20_248_-	0	1	0	0	0	0	0	0	0	0	0	Bacteria	Firmicutes									[C] Energy production and conversion
15:000000000-AVD4R:1:2101:8775:13397_1_299_-	0	0	0	0	0	0	0	0	1	0	0	Bacteria	Bacteroidetes								LPS-assembly lipoprotein LptE
15:000000000-AVD4R:1:2101:9692:6498_1_318_-	0	2	1	0	0	0	0	0	1	0	0	Bacteria	Bacteroidetes	Bacteroidia	Bacteroidales				Elongation factor Tu (EF-Tu)	TRAFAC class translation factor GTPase superfamily, Classic translation factor GTPase family, EF-Tu/EF-1A subfamily	Translation elongation factor EFTu/EF1A, bacterial/organelle	[J] Translation, ribosomal structure and biogenesis		K02358
15:000000000-AVD4R:1:2101:9960:1707_1_265_-	0	1	0	0	0	0	0	0	0	0	0	Bacteria	Bacteroidetes	Bacteroidia	Bacteroidales	Prevotellaceae	Prevotella	Prevotella sp. CAG:1031			Glycerophosphoryl diester phosphodiesterase	[C] Energy production and conversion
15:000000000-AVD4R:1:2102:10062:19156_1_366_+	0	0	0	0	0	0	0	0	1	0	0	Bacteria						uncultured bacterium BAC10G6
15:000000000-AVD4R:1:2102:11196:17094_1_272_+	0	2	0	0	0	0	0	0	0	2	3	Bacteria	Firmicutes	Clostridia	Clostridiales	Eubacteriaceae	Eubacterium		Pyruvate-flavodoxin oxidoreductase (EC 1.2.7.-)	NifJ family	Pyruvate-flavodoxin oxidoreductase	[C] Energy production and conversion			1.2.7.-
15:000000000-AVD4R:1:2102:11907:13577_1_284_-	0	0	0	0	0	0	0	0	0	1	0	Bacteria	Bacteroidetes	Bacteroidia	Bacteroidales	Prevotellaceae	Prevotella
15:000000000-AVD4R:1:2102:12120:4200_1_300_-	0	0	0	0	1	1	1	0	2	0	0	Bacteria							Rubrerythrin-1 (Rr 1) (NADH peroxidase) (NPXase) (Npx) (EC 1.11.1.1)			[C] Energy production and conversion			1.11.1.1
15:000000000-AVD4R:1:2102:12293:1745_1_327_+	1	0	0	0	0	0	0	0	0	1	3
15:000000000-AVD4R:1:2102:13168:11213_1_277_-	0	0	0	2	0	0	0	0	0	0	0	Bacteria	Firmicutes	Clostridia	Clostridiales	Lachnospiraceae			Flagellin	Bacterial flagellin family	Flagellin	[N] Cell motility		K02406
15:000000000-AVD4R:1:2102:13295:8558_1_337_-	0	0	0	0	0	0	0	1	0	0	0	Bacteria	Bacteroidetes	Bacteroidia	Bacteroidales						Tricorn protease	[M] Cell wall/membrane/envelope biogenesis
15:000000000-AVD4R:1:2102:14328:11004_41_367_+	0	0	1	0	0	1	1	0	0	0	0	Bacteria	Actinobacteria	Actinobacteria	Geodermatophilales	Geodermatophilaceae	Blastococcus				Lactobacillus phage LBR48, DUF805
15:000000000-AVD4R:1:2102:14378:9442_1_305_-	0	1	0	1	0	0	0	1	0	0	1	Bacteria	Firmicutes						Lactaldehyde reductase (EC 1.1.1.77) (Propanediol oxidoreductase)	Iron-containing alcohol dehydrogenase family			L-fucose degradation	K00048	1.1.1.77
15:000000000-AVD4R:1:2102:14494:22299_1_351_+	0	0	0	0	0	1	1	1	0	0	0	Bacteria	Bacteroidetes	Bacteroidia	Bacteroidales	Prevotellaceae	Prevotella	Prevotella sp. CAG:1031
15:000000000-AVD4R:1:2102:14895:12155_1_215_+	1	0	0	0	0	0	0	1	0	0	0	Bacteria	Firmicutes						Protein IolH		Transcription regulator HTH, AraC- type	[G] Carbohydrate transport and metabolism	myo-inositol degradation into acetyl-CoA	K06605
15:000000000-AVD4R:1:2102:14930:20885_121_295_-	0	1	0	0	0	1	0	0	0	0	0	Eukaryota	Chordata	Mammalia	Rodentia	Muridae					Alpha-actinin-4	[Z] Cytoskeleton
15:000000000-AVD4R:1:2102:15052:5069_1_229_+	0	0	1	1	0	1	1	1	0	0	0	Bacteria	Bacteroidetes	Bacteroidia	Bacteroidales	Bacteroidaceae	Bacteroides					[P] Inorganic ion transport and metabolism
15:000000000-AVD4R:1:2102:15251:20493_1_283_-	0	0	1	0	1	1	1	1	1	1	1	Bacteria	Bacteroidetes	Bacteroidia	Bacteroidales	Bacteroidaceae	Bacteroides				Pyruvate-flavodoxin oxidoreductase	[C] Energy production and conversion
15:000000000-AVD4R:1:2102:15266:4044_1_236_+	0	0	0	0	0	0	0	0	1	0	0
15:000000000-AVD4R:1:2102:15509:22395_1_205_-	0	0	0	0	0	0	0	0	2	0	0	Bacteria	Bacteroidetes	Bacteroidia	Bacteroidales	Porphyromonadaceae
15:000000000-AVD4R:1:2102:15711:22940_1_207_-	1	1	0	0	1	0	0	0	0	1	1	Bacteria							Glyceraldehyde-3-phosphate dehydrogenase (GAPDH) (EC 1.2.1.12) (NAD-dependent glyceraldehyde-3-phosphate dehydrogenase) (Fragment)	Glyceraldehyde-3-phosphate dehydrogenase family	Glyceraldehyde/Erythrose phosphate dehydrogenase family	[G] Carbohydrate transport and metabolism	glycolysis		1.2.1.12
15:000000000-AVD4R:1:2102:16071:11058_1_349_-	0	0	0	0	0	0	0	0	0	1	2
15:000000000-AVD4R:1:2102:16727:5961_1_311_+	0	0	0	0	0	0	0	0	1	0	0	Bacteria	Bacteroidetes	Bacteroidia	Bacteroidales	Prevotellaceae	Prevotella				Glycoside hydrolase, family 13
15:000000000-AVD4R:1:2102:17228:20300_1_249_+	0	0	0	0	0	0	0	0	1	0	0	Bacteria	Bacteroidetes	Bacteroidia	Bacteroidales	Prevotellaceae	Prevotella		60 kDa chaperonin (GroEL protein) (Protein Cpn60)	Chaperonin (HSP60) family		[O] Posttranslational modification, protein turnover, chaperones		K04077
15:000000000-AVD4R:1:2102:17321:3488_1_296_+	0	1	1	1	0	0	0	0	0	1	0	Bacteria	Bacteroidetes	Bacteroidia	Bacteroidales							[P] Inorganic ion transport and metabolism
15:000000000-AVD4R:1:2102:18325:19541_1_234_+	0	0	0	0	0	0	0	0	0	0	1	Bacteria	Firmicutes	Clostridia	Clostridiales				Argininosuccinate synthase (EC 6.3.4.5) (Citrulline--aspartate ligase)	Argininosuccinate synthase family, Type 1 subfamily	Argininosuccinate synthase, type 1 subfamily	[E] Amino acid transport and metabolism	L-arginine biosynthesis	K01940	6.3.4.5
15:000000000-AVD4R:1:2102:18778:3704_1_217_-	0	0	0	0	0	0	0	0	0	0	2
15:000000000-AVD4R:1:2102:19167:14832_1_222_+	0	0	0	0	0	0	0	0	1	0	0	Bacteria	Bacteroidetes	Bacteroidia	Bacteroidales	Prevotellaceae	Prevotella	Prevotella marshii			Protein-export membrane protein SecD/SecF, archaeal and bacterial	[U] Intracellular trafficking, secretion, and vesicular transport
15:000000000-AVD4R:1:2102:19850:18088_1_348_+	0	0	0	0	0	0	0	0	0	0	1	Bacteria	Firmicutes	Clostridia	Clostridiales						Peptide/nickel binding protein, MppA-type
15:000000000-AVD4R:1:2102:20146:14376_1_247_+	0	0	0	0	0	0	0	0	0	0	1	Bacteria	Firmicutes	Clostridia	Clostridiales	Lachnospiraceae		Lachnospiraceae bacterium 28-4	Putative sensory transducer protein		Chemotaxis methyl-accepting receptor			K03406
15:000000000-AVD4R:1:2102:21080:21575_1_257_+	1	0	2	2	2	2	2	1	0	0	0
15:000000000-AVD4R:1:2102:21297:6674_1_307_-	0	0	0	0	1	0	0	0	0	1	0	Bacteria	Firmicutes									[G] Carbohydrate transport and metabolism
15:000000000-AVD4R:1:2102:21974:3575_1_316_-	0	0	0	0	0	0	0	0	0	0	1	Bacteria	Firmicutes	Clostridia	Clostridiales							[C] Energy production and conversion
15:000000000-AVD4R:1:2102:24317:10378_1_212_+	0	0	0	0	0	2	1	0	0	0	0	Bacteria	Bacteroidetes	Bacteroidia	Bacteroidales	Bacteroidaceae	Bacteroides	Bacteroides sp. CAG:927
15:000000000-AVD4R:1:2102:24504:10879_1_319_-	0	1	0	1	0	0	0	0	1	0	0	Bacteria	Bacteroidetes									[P] Inorganic ion transport and metabolism
15:000000000-AVD4R:1:2102:24998:9543_1_294_+	0	0	1	1	0	0	0	0	0	0	0	Bacteria	Bacteroidetes	Bacteroidia	Bacteroidales				Cytosol non-specific dipeptidase (EC 3.4.13.18) (Aminoacyl-histidine dipeptidase) (Beta-alanyl-histidine dipeptidase) (Carnosinase) (Cysteinylglycinase) (Peptidase D) (Xaa-His dipeptidase) (X-His dipeptidase)	Peptidase M20C family		[E] Amino acid transport and metabolism		K01270	3.4.13.18
15:000000000-AVD4R:1:2102:25693:19831_1_240_-	1	2	2	0	0	1	1	2	2	1	0	Bacteria	Firmicutes	Clostridia	Clostridiales						Flagellin	[N] Cell motility
15:000000000-AVD4R:1:2102:27229:16485_1_270_+	0	0	0	0	0	0	0	0	0	2	2	Bacteria	Bacteroidetes	Bacteroidia	Bacteroidales
15:000000000-AVD4R:1:2102:2737:9488_1_319_-	1	0	0	1	0	1	0	0	0	0	0	Bacteria	Bacteroidetes	Bacteroidia	Bacteroidales			Bacteroidales bacterium 52_46
15:000000000-AVD4R:1:2102:27469:6849_1_225_+	0	1	0	0	0	0	1	1	0	0	0	Bacteria
15:000000000-AVD4R:1:2102:27918:11509_1_256_+	0	0	0	0	0	1	1	0	0	1	0	Bacteria	Bacteroidetes						Aspartate ammonia-lyase (Aspartase) (EC 4.3.1.1)	Class-II fumarase/aspartase family, Aspartase subfamily		[E] Amino acid transport and metabolism		K01744	4.3.1.1
15:000000000-AVD4R:1:2102:27952:13654_1_340_-	0	0	0	1	0	0	0	0	0	0	0	Bacteria	Firmicutes						DNA-binding protein HU (DNA-binding protein II) (HB)	Bacterial histone-like protein family		[L] Replication, recombination and repair
15:000000000-AVD4R:1:2102:28126:14474_1_236_+	1	0	0	0	0	0	0	0	0	0	0	Bacteria	Firmicutes	Clostridia	Clostridiales	Lachnospiraceae	Roseburia		L-ribulose-5-phosphate 4-epimerase UlaF (EC 5.1.3.4) (L-ascorbate utilization protein F) (Phosphoribulose isomerase)	Aldolase class II family, AraD/FucA subfamily		[G] Carbohydrate transport and metabolism	L-ascorbate degradation	K03077	5.1.3.4
15:000000000-AVD4R:1:2102:4602:18960_1_210_-	0	0	0	0	0	2	1	0	0	0	0	Bacteria	Bacteroidetes	Bacteroidia	Bacteroidales
15:000000000-AVD4R:1:2102:5493:7655_24_282_-	0	0	1	0	0	1	1	1	1	0	0	Bacteria	Firmicutes						50S ribosomal protein L17	Bacterial ribosomal protein bL17 family	Ribosomal protein L17			K02879
15:000000000-AVD4R:1:2102:5556:6393_1_217_-	1	0	0	0	1	1	1	1	0	1	1	Bacteria	Firmicutes	Clostridia	Clostridiales
15:000000000-AVD4R:1:2102:7015:14711_1_342_-	0	0	1	0	0	0	0	0	1	0	0	Bacteria	Bacteroidetes	Bacteroidia	Bacteroidales	Bacteroidaceae	Bacteroides	Bacteroides sp. CAG:927				[M] Cell wall/membrane/envelope biogenesis
15:000000000-AVD4R:1:2102:7486:20852_1_346_-	0	0	0	0	0	0	0	0	1	0	0	Bacteria							Malonyl CoA-acyl carrier protein transacylase (MCT) (EC 2.3.1.39)	FabD family	Malonyl CoA-acyl carrier protein transacylase	[I] Lipid transport and metabolism	fatty acid biosynthesis	K00645	2.3.1.39
15:000000000-AVD4R:1:2102:7599:13205_1_346_+	0	0	0	1	0	0	0	0	0	0	0	Bacteria										[C] Energy production and conversion
15:000000000-AVD4R:1:2102:7736:15612_1_240_+	0	0	0	0	1	0	0	0	0	0	0
15:000000000-AVD4R:1:2102:8070:21776_1_239_-	0	1	2	0	0	0	0	0	0	0	0	Bacteria	Bacteroidetes	Bacteroidia	Bacteroidales	Bacteroidaceae	Mediterranea
15:000000000-AVD4R:1:2102:8336:18244_1_239_-	0	0	0	0	0	0	0	1	0	0	1	Bacteria	Firmicutes					Firmicutes bacterium ASF500
15:000000000-AVD4R:1:2102:8958:8366_1_294_-	1	0	0	0	0	0	0	0	0	1	1	Bacteria							Xylan 1,4-beta-xylosidase (EC 3.2.1.37) (1,4-beta-D-xylan xylohydrolase) (Alpha-L-arabinofuranosidase) (Arabinosidase) (EC 3.2.1.55) (Beta-D-xylosidase) (Exo-1,4-beta-xylosidase)	Glycosyl hydrolase 3 family	Glycoside hydrolase family 3	[G] Carbohydrate transport and metabolism	xylan degradation	K05349	3.2.1.37
15:000000000-AVD4R:1:2102:9018:21972_1_189_+	0	1	1	0	0	0	0	0	0	0	0	Bacteria	Firmicutes						Beta-1,4-mannooligosaccharide phosphorylase (EC 2.4.1.319) (RaMP2)	Glycosyl hydrolase 130 family		[G] Carbohydrate transport and metabolism		K18785	2.4.1.319
15:000000000-AVD4R:1:2103:10051:7929_1_224_+	3	2	2	2	3	2	2	2	3	2	2
15:000000000-AVD4R:1:2103:10309:6063_1_363_+	3	2	0	0	0	3	3	3	2	1	0
15:000000000-AVD4R:1:2103:10759:9805_1_311_-	0	1	0	0	0	0	0	1	0	0	0	Bacteria	Firmicutes									[G] Carbohydrate transport and metabolism
15:000000000-AVD4R:1:2103:12335:1986_1_271_-	0	0	0	0	1	0	0	1	0	0	0	Bacteria
15:000000000-AVD4R:1:2103:13011:9412_1_221_+	1	0	0	0	0	0	0	0	0	0	0	Bacteria	Firmicutes						Uncharacterized protein TP_0013
15:000000000-AVD4R:1:2103:14243:9265_1_356_+	1	1	0	0	1	1	1	1	0	0	0	Bacteria	Firmicutes	Clostridia	Clostridiales	Ruminococcaceae	Ruminococcus				Pseudouridine synthase I, TruA	[M] Cell wall/membrane/envelope biogenesis
15:000000000-AVD4R:1:2103:14357:9772_1_233_-	0	0	0	0	1	0	0	0	0	0	0	Bacteria	Proteobacteria	Deltaproteobacteria	Desulfovibrionales	Desulfovibrionaceae	Bilophila		Choline trimethylamine-lyase (Choline TMA-lyase) (EC 4.3.99.4) (Choline utilization protein C) (Glycyl radical enzyme CutC) (GRE CutC)			[C] Energy production and conversion	choline degradation	K20038	4.3.99.4
15:000000000-AVD4R:1:2103:14570:10994_1_251_+	0	0	0	0	0	1	1	0	0	0	0	Bacteria	Bacteroidetes	Bacteroidia	Bacteroidales	Bacteroidaceae	Bacteroides				Histidine phosphatase superfamily
15:000000000-AVD4R:1:2103:14875:8840_1_230_+	0	1	0	0	0	0	0	1	0	1	1	Bacteria	Firmicutes	Clostridia	Clostridiales	Lachnospiraceae		Lachnospiraceae bacterium 28-4				[G] Carbohydrate transport and metabolism
15:000000000-AVD4R:1:2103:14961:19752_162_282_-	0	0	0	0	0	1	1	0	0	0	0
15:000000000-AVD4R:1:2103:15063:22049_1_321_-	0	1	0	0	0	0	0	0	0	0	0	Bacteria	Bacteroidetes	Bacteroidia	Bacteroidales							[P] Inorganic ion transport and metabolism
15:000000000-AVD4R:1:2103:15471:3254_1_216_+	1	1	0	0	0	0	0	0	0	0	0
15:000000000-AVD4R:1:2103:15511:2693_1_341_-	0	0	1	0	2	2	1	1	1	0	1	Bacteria	Bacteroidetes	Bacteroidia	Bacteroidales				UDP-glucose 4-epimerase (EC 5.1.3.2) (Galactowaldenase) (UDP-galactose 4-epimerase)	NAD(P)-dependent epimerase/dehydratase family	UDP-glucose 4-epimerase GalE	[M] Cell wall/membrane/envelope biogenesis	galactose metabolism	K01784	5.1.3.2
15:000000000-AVD4R:1:2103:16013:20964_1_262_+	1	1	0	0	0	1	3	1	0	1	0	Bacteria	Bacteroidetes	Bacteroidia	Bacteroidales	Bacteroidaceae	Bacteroides					[P] Inorganic ion transport and metabolism
15:000000000-AVD4R:1:2103:16077:13135_1_217_+	1	1	1	0	0	1	1	1	1	1	1	Bacteria	Bacteroidetes	Bacteroidia	Bacteroidales							[C] Energy production and conversion
15:000000000-AVD4R:1:2103:16106:22344_1_244_+	0	0	0	0	1	0	0	0	1	0	0	Bacteria	Bacteroidetes	Bacteroidia	Bacteroidales	Prevotellaceae	Prevotella
15:000000000-AVD4R:1:2103:17191:15665_1_224_+	0	0	0	0	0	0	0	0	0	0	1	Bacteria	Firmicutes
15:000000000-AVD4R:1:2103:18151:3543_1_251_+	3	2	0	0	0	1	2	2	1	0	0
15:000000000-AVD4R:1:2103:18499:17744_1_330_-	0	1	0	0	0	0	0	0	0	1	0	Bacteria	Bacteroidetes	Bacteroidia					Serine hydroxymethyltransferase (SHMT) (Serine methylase) (EC 2.1.2.1)	SHMT family	Serine hydroxymethyltransferase		tetrahydrofolate interconversion	K00600	2.1.2.1
15:000000000-AVD4R:1:2103:18646:25152_1_98_-	0	0	0	0	0	1	1	0	0	0	0	Bacteria									Phosphoenolpyruvate carboxykinase, ATP-utilising	[C] Energy production and conversion
15:000000000-AVD4R:1:2103:18728:19731_1_298_-	1	0	0	0	0	0	0	0	0	0	0
15:000000000-AVD4R:1:2103:18756:24290_1_211_-	0	0	0	0	0	0	1	1	0	0	0	Bacteria	Bacteroidetes	Bacteroidia	Bacteroidales	Prevotellaceae	Prevotella
15:000000000-AVD4R:1:2103:19563:21148_1_304_+	0	1	0	0	2	1	2	2	1	1	0	Bacteria	Bacteroidetes	Bacteroidia	Bacteroidales
15:000000000-AVD4R:1:2103:20009:2132_1_289_+	0	0	0	0	0	0	0	0	0	0	1	Bacteria	Firmicutes	Bacilli	Lactobacillales	Lactobacillaceae	Lactobacillus	Lactobacillus murinus	Dihydrolipoyllysine-residue acetyltransferase component of pyruvate dehydrogenase complex (EC 2.3.1.12) (Dihydrolipoamide acetyltransferase component of pyruvate dehydrogenase complex) (E2)	2-oxoacid dehydrogenase family		[C] Energy production and conversion		K00627	2.3.1.12
15:000000000-AVD4R:1:2103:20434:21170_1_279_-	0	0	0	0	0	0	0	1	0	0	0	Bacteria	Firmicutes	Clostridia	Clostridiales							[G] Carbohydrate transport and metabolism
15:000000000-AVD4R:1:2103:20467:16653_1_336_-	0	0	0	0	1	1	1	1	0	0	0	Bacteria	Bacteroidetes	Bacteroidia	Bacteroidales							[C] Energy production and conversion
15:000000000-AVD4R:1:2103:20778:4834_1_337_-	1	2	2	0	0	3	2	1	1	2	1	Bacteria	Bacteroidetes	Bacteroidia					Phosphoglucomutase (PGM) (EC 5.4.2.2) (Alpha-phosphoglucomutase) (Glucose phosphomutase)	Phosphohexose mutase family		[G] Carbohydrate transport and metabolism	diglucosyl-diacylglycerol biosynthesis	K01835	5.4.2.2
15:000000000-AVD4R:1:2103:20831:19232_1_208_-	0	0	0	0	1	0	0	0	0	0	0	Bacteria	Bacteroidetes	Bacteroidia	Bacteroidales	Prevotellaceae	Prevotella	Prevotella sp. CAG:485
15:000000000-AVD4R:1:2103:20835:10835_1_362_-	0	0	0	0	0	1	1	2	0	0	0	Bacteria	Bacteroidetes	Bacteroidia	Bacteroidales	Bacteroidaceae
15:000000000-AVD4R:1:2103:2144:9785_1_299_-	0	0	1	0	0	0	0	0	0	0	0	Bacteria	Bacteroidetes	Bacteroidia	Bacteroidales				50S ribosomal protein L11	Universal ribosomal protein uL11 family	Ribosomal protein L11, bacterial-type	[J] Translation, ribosomal structure and biogenesis		K02867
15:000000000-AVD4R:1:2103:21480:24464_1_225_-	0	0	0	0	0	0	0	0	1	0	0	Bacteria	Bacteroidetes	Bacteroidia	Bacteroidales	Prevotellaceae	Prevotella				Phosphoserine aminotransferase
15:000000000-AVD4R:1:2103:21722:16625_1_363_-	2	0	0	0	0	0	1	3	0	0	0	Bacteria	Firmicutes	Clostridia	Clostridiales	Clostridiaceae	Clostridium				Glycoside hydrolase, family 11/12	[G] Carbohydrate transport and metabolism
15:000000000-AVD4R:1:2103:22437:10141_1_297_+	0	0	1	0	1	1	1	1	0	0	1	Bacteria	Bacteroidetes	Bacteroidia	Bacteroidales							[M] Cell wall/membrane/envelope biogenesis
15:000000000-AVD4R:1:2103:22536:4856_1_347_+	0	0	0	0	0	0	0	0	0	1	0	Bacteria							Uncharacterized ABC transporter ATP-binding protein YurJ (EC 3.6.3.-)	ABC transporter superfamily	Regulatory protein RecX	[G] Carbohydrate transport and metabolism		K10112	3.6.3.-
15:000000000-AVD4R:1:2103:22747:4442_1_214_-	0	0	1	0	0	0	0	0	0	1	0	Bacteria	Bacteroidetes	Bacteroidia	Bacteroidales				TonB-dependent receptor SusC (Starch-utilization system protein C)	TonB-dependent receptor family		[P] Inorganic ion transport and metabolism	starch degradation	K21573
15:000000000-AVD4R:1:2103:22967:21190_1_248_+	0	0	0	0	0	1	1	1	1	0	0	Bacteria	Bacteroidetes	Bacteroidia	Bacteroidales							[P] Inorganic ion transport and metabolism
15:000000000-AVD4R:1:2103:22995:13464_1_377_-	0	0	0	1	0	0	0	0	0	0	0	Bacteria	Bacteroidetes	Bacteroidia	Bacteroidales
15:000000000-AVD4R:1:2103:23336:9905_1_259_-	0	0	0	0	0	0	0	0	0	0	3
15:000000000-AVD4R:1:2103:23751:4184_1_212_-	0	0	0	0	0	0	0	0	1	0	0
15:000000000-AVD4R:1:2103:24224:3712_1_207_+	1	0	0	0	1	1	1	0	1	0	0
15:000000000-AVD4R:1:2103:24519:9201_1_268_+	1	0	0	0	0	0	0	0	0	0	0	Bacteria	Bacteroidetes	Bacteroidia	Bacteroidales	Prevotellaceae			Glutamate dehydrogenase (GDH) (EC 1.4.1.3) (NAD(P)H-utilizing glutamate dehydrogenase)	Glu/Leu/Phe/Val dehydrogenases family	Glutamate dehydrogenase	[E] Amino acid transport and metabolism		K00262	1.4.1.3
15:000000000-AVD4R:1:2103:24895:17736_1_254_+	0	0	0	0	0	0	0	0	0	1	1	Bacteria	Bacteroidetes
15:000000000-AVD4R:1:2103:26236:10547_1_210_+	0	2	0	2	0	1	1	1	0	2	2	Bacteria	Firmicutes	Clostridia	Clostridiales				L-fucose isomerase (EC 5.3.1.25) (6-deoxy-L-galactose isomerase) (FucIase)	L-fucose isomerase family	L-fucose isomerase		L-fucose degradation	K01818	5.3.1.25
15:000000000-AVD4R:1:2103:26721:14530_1_238_-	0	0	0	0	0	0	0	0	0	1	0
15:000000000-AVD4R:1:2103:26982:19835_1_212_-	0	2	1	1	0	1	1	0	2	2	1	Bacteria	Bacteroidetes	Bacteroidia	Bacteroidales				50S ribosomal protein L2	Universal ribosomal protein uL2 family	Ribosomal protein L2, bacterial/organellar-type	[J] Translation, ribosomal structure and biogenesis		K02886
15:000000000-AVD4R:1:2103:27541:19273_1_319_-	1	0	0	0	0	0	0	0	0	0	0	Bacteria	Firmicutes	Erysipelotrichia	Erysipelotrichales	Erysipelotrichaceae
15:000000000-AVD4R:1:2103:27636:13915_1_264_-	3	2	0	1	1	0	0	2	0	2	5	Bacteria	Firmicutes	Clostridia	Clostridiales	Lachnospiraceae			Chaperone protein DnaK (HSP70) (Heat shock 70 kDa protein) (Heat shock protein 70)	Heat shock protein 70 family	Heat shock protein 70 family			K04043
15:000000000-AVD4R:1:2103:3887:15788_1_240_-	0	1	0	0	0	0	0	0	0	1	4	Bacteria	Firmicutes
15:000000000-AVD4R:1:2103:6003:14113_1_332_+	0	0	0	0	0	0	1	0	0	0	0	Bacteria	Bacteroidetes						Glycerol kinase (EC 2.7.1.30) (ATP:glycerol 3-phosphotransferase) (Glycerokinase) (GK)	FGGY kinase family	Glycerol kinase		glycerol degradation via glycerol kinase pathway	K00864	2.7.1.30
15:000000000-AVD4R:1:2103:7313:17006_1_355_-	2	1	0	1	0	0	0	4	0	2	3	Bacteria	Firmicutes	Clostridia	Clostridiales				Chemotaxis protein CheV					K03415
15:000000000-AVD4R:1:2103:8275:23722_1_254_-	0	0	0	1	0	0	0	0	0	0	0	Bacteria	Firmicutes	Clostridia	Clostridiales	Clostridiaceae	Clostridium					[G] Carbohydrate transport and metabolism
15:000000000-AVD4R:1:2103:8345:18719_1_336_-	0	0	0	0	0	0	0	2	0	0	0	Bacteria	Firmicutes					Firmicutes bacterium CAG:110	Elongation factor Ts (EF-Ts)	EF-Ts family	Translation elongation factor EFTs/EF1B	[J] Translation, ribosomal structure and biogenesis		K02357
15:000000000-AVD4R:1:2103:9767:22672_1_319_+	0	0	0	0	0	0	0	0	0	0	1	Bacteria	Firmicutes	Clostridia	Clostridiales				Glucose-6-phosphate isomerase (GPI) (EC 5.3.1.9) (Phosphoglucose isomerase) (PGI) (Phosphohexose isomerase) (PHI)	GPI family	Phosphoglucose isomerase (PGI)	[G] Carbohydrate transport and metabolism	gluconeogenesis	K01810	5.3.1.9
15:000000000-AVD4R:1:2104:10780:17174_1_238_+	0	0	0	0	0	1	1	2	0	0	0	Bacteria	Bacteroidetes	Bacteroidia	Bacteroidales							[G] Carbohydrate transport and metabolism
15:000000000-AVD4R:1:2104:10802:15005_1_282_+	0	0	0	0	0	0	0	0	1	0	0	Bacteria	Bacteroidetes	Bacteroidia	Bacteroidales	Bacteroidaceae	Bacteroides	Bacteroides sp. CAG:927
15:000000000-AVD4R:1:2104:11266:21416_130_289_-	0	1	0	0	1	0	0	0	0	0	0	Bacteria	Firmicutes	Clostridia	Clostridiales	Ruminococcaceae	Ruminococcus	Ruminococcus flavefaciens
15:000000000-AVD4R:1:2104:12026:22025_1_247_+	0	0	1	0	1	1	1	1	0	0	0	Bacteria	Bacteroidetes	Bacteroidia	Bacteroidales	Prevotellaceae	Prevotella	Prevotella sp. CAG:485
15:000000000-AVD4R:1:2104:12112:24392_1_332_+	0	0	0	0	0	0	0	0	0	2	0	Bacteria	Bacteroidetes	Bacteroidia
15:000000000-AVD4R:1:2104:12194:21624_1_226_-	0	0	0	0	0	0	0	0	0	0	1	Bacteria	Firmicutes						ATP synthase subunit beta (EC 3.6.3.14) (ATP synthase F1 sector subunit beta) (F-ATPase subunit beta)	ATPase alpha/beta chains family	ATPase, F1 complex, beta subunit	[C] Energy production and conversion		K02112	3.6.3.14
15:000000000-AVD4R:1:2104:12478:8427_1_288_+	1	0	0	0	0	0	0	0	0	0	0	Bacteria	Firmicutes	Clostridia	Clostridiales	Ruminococcaceae	Ruminiclostridium
15:000000000-AVD4R:1:2104:12599:8534_1_286_-	0	0	1	3	3	1	2	1	0	0	0	Bacteria	Bacteroidetes	Bacteroidia	Bacteroidales
15:000000000-AVD4R:1:2104:12725:13788_1_265_+	0	0	1	0	0	1	1	0	1	0	0	Bacteria	Bacteroidetes	Cytophagia	Cytophagales	Cyclobacteriaceae	Aquiflexum	Aquiflexum balticum	30S ribosomal protein S8	Universal ribosomal protein uS8 family	Ribosomal protein S8	[J] Translation, ribosomal structure and biogenesis		K02994
15:000000000-AVD4R:1:2104:12822:18670_1_227_+	0	0	0	0	1	0	0	0	0	0	0
15:000000000-AVD4R:1:2104:13654:2042_1_355_-	0	0	0	1	1	0	1	0	0	0	0	Bacteria	Bacteroidetes	Bacteroidia	Bacteroidales				Elongation factor G (EF-G)	TRAFAC class translation factor GTPase superfamily, Classic translation factor GTPase family, EF-G/EF-2 subfamily		[J] Translation, ribosomal structure and biogenesis
15:000000000-AVD4R:1:2104:14062:4269_1_272_-	3	2	3	3	2	0	0	0	0	0	2
15:000000000-AVD4R:1:2104:14289:19022_1_326_+	0	0	0	0	0	0	0	1	0	0	0	Bacteria	Firmicutes									[E] Amino acid transport and metabolism
15:000000000-AVD4R:1:2104:15411:9633_1_287_-	1	1	0	0	0	0	0	1	0	3	3	Bacteria	Firmicutes
15:000000000-AVD4R:1:2104:15805:11515_1_356_-	0	0	1	1	1	0	0	0	0	0	0	Bacteria	Bacteroidetes	Bacteroidia	Bacteroidales	Bacteroidaceae	Bacteroides	Bacteroides uniformis			Glycoside hydrolase family 31
15:000000000-AVD4R:1:2104:16609:22604_1_233_+	2	2	1	0	2	2	1	0	1	1	2	Bacteria	Bacteroidetes	Bacteroidia	Bacteroidales				50S ribosomal protein L10	Universal ribosomal protein uL10 family		[J] Translation, ribosomal structure and biogenesis		K02864
15:000000000-AVD4R:1:2104:16700:20860_1_267_+	2	3	0	3	3	1	0	4	0	5	5	Bacteria	Firmicutes	Clostridia	Clostridiales				Acryloyl-CoA reductase electron transfer subunit beta (Electron transfer flavoprotein large subunit) (ETFLS) (Electron transfer flavoprotein subunit beta) (Beta-ETF)	ETF alpha-subunit/FixB family	Electron transfer flavoprotein, alpha subunit	[C] Energy production and conversion
15:000000000-AVD4R:1:2104:16844:5546_1_218_-	0	0	0	1	0	0	0	0	0	0	0	Bacteria	Bacteroidetes	Bacteroidia	Bacteroidales	Rikenellaceae	Alistipes		TonB-dependent receptor SusC (Starch-utilization system protein C)	TonB-dependent receptor family		[P] Inorganic ion transport and metabolism	starch degradation	K21573
15:000000000-AVD4R:1:2104:16938:12940_1_236_+	0	0	0	0	1	1	1	1	1	0	0	Bacteria	Bacteroidetes	Bacteroidia	Bacteroidales	Bacteroidaceae	Bacteroides
15:000000000-AVD4R:1:2104:17538:12703_1_353_+	0	0	0	0	0	0	0	0	1	0	0	Bacteria							Oxalyl-CoA decarboxylase (EC 4.1.1.8)	TPP enzyme family	Oxalyl-CoA decarboxylase	[E] Amino acid transport and metabolism	oxalate degradation	K01577	4.1.1.8
15:000000000-AVD4R:1:2104:17687:23302_1_205_-	1	1	1	1	1	1	1	1	0	1	1	Bacteria	Bacteroidetes						TonB-dependent receptor SusC (Starch-utilization system protein C)	TonB-dependent receptor family			starch degradation	K21573
15:000000000-AVD4R:1:2104:1862:13353_1_208_-	0	2	1	0	1	1	1	0	0	0	0	Bacteria	Bacteroidetes	Bacteroidia	Bacteroidales	Bacteroidaceae						[P] Inorganic ion transport and metabolism
15:000000000-AVD4R:1:2104:19208:14729_1_219_+	0	0	0	0	0	1	2	0	0	0	0
15:000000000-AVD4R:1:2104:19439:7665_1_275_-	1	0	0	0	0	0	0	1	0	0	0	Bacteria	Firmicutes	Clostridia	Clostridiales				Glyceraldehyde-3-phosphate dehydrogenase (GAPDH) (EC 1.2.1.12) (NAD-dependent glyceraldehyde-3-phosphate dehydrogenase)	Glyceraldehyde-3-phosphate dehydrogenase family	Glyceraldehyde/Erythrose phosphate dehydrogenase family	[G] Carbohydrate transport and metabolism	glycolysis	K00134	1.2.1.12
15:000000000-AVD4R:1:2104:19586:16220_1_334_-	0	0	0	0	0	0	0	0	1	0	0	Bacteria	Bacteroidetes	Bacteroidia	Bacteroidales	Prevotellaceae	Prevotella	Prevotella sp. CAG:1031
15:000000000-AVD4R:1:2104:19908:5762_1_250_+	0	0	0	0	0	0	0	0	0	1	1	Bacteria	Firmicutes						ATP synthase subunit beta (EC 3.6.3.14) (ATP synthase F1 sector subunit beta) (F-ATPase subunit beta)	ATPase alpha/beta chains family	ATPase, F1 complex, beta subunit	[C] Energy production and conversion		K02112	3.6.3.14
15:000000000-AVD4R:1:2104:20251:6474_1_274_+	0	0	0	0	0	0	0	0	1	0	0	Bacteria									Biopolymer transport protein ExbD/TolR
15:000000000-AVD4R:1:2104:20843:18167_1_351_+	1	1	0	0	0	0	0	0	0	0	0	Bacteria							60 kDa chaperonin (GroEL protein) (Protein Cpn60)	Chaperonin (HSP60) family		[O] Posttranslational modification, protein turnover, chaperones
15:000000000-AVD4R:1:2104:21004:14533_1_245_+	0	0	0	0	0	0	0	0	1	0	0								30S ribosomal protein S4	Universal ribosomal protein uS4 family	Ribosomal protein S4/S9	[J] Translation, ribosomal structure and biogenesis		K02986
15:000000000-AVD4R:1:2104:21730:5965_1_263_-	1	0	0	0	0	0	1	0	0	1	0	Bacteria	Bacteroidetes	Bacteroidia	Bacteroidales				Glutamate dehydrogenase (GDH) (EC 1.4.1.3) (NAD(P)H-utilizing glutamate dehydrogenase)	Glu/Leu/Phe/Val dehydrogenases family	Glutamate dehydrogenase	[E] Amino acid transport and metabolism		K00262	1.4.1.3
15:000000000-AVD4R:1:2104:21980:5551_1_228_+	1	1	0	1	0	0	0	1	0	1	1	Bacteria	Firmicutes						Pyruvate, phosphate dikinase (EC 2.7.9.1) (Pyruvate, orthophosphate dikinase)	PEP-utilizing enzyme family	Pyruvate, phosphate dikinase	[G] Carbohydrate transport and metabolism			2.7.9.1
15:000000000-AVD4R:1:2104:22296:8570_57_272_+	0	0	0	0	0	0	1	0	0	0	0	Bacteria	Bacteroidetes	Bacteroidia	Bacteroidales	Prevotellaceae	Prevotella					[C] Energy production and conversion
15:000000000-AVD4R:1:2104:22467:22978_1_299_+	0	0	0	0	0	0	0	0	0	1	0	Bacteria	Firmicutes	Clostridia	Clostridiales				Chaperone protein DnaK (HSP70) (Heat shock 70 kDa protein) (Heat shock protein 70)	Heat shock protein 70 family	Heat shock protein 70 family	[O] Posttranslational modification, protein turnover, chaperones		K04043
15:000000000-AVD4R:1:2104:22650:6874_1_289_+	0	0	0	0	0	1	1	1	0	0	0
15:000000000-AVD4R:1:2104:22796:17026_1_261_+	1	2	2	3	1	2	3	3	2	4	1	Bacteria	Bacteroidetes	Bacteroidia	Bacteroidales	Tannerellaceae	Parabacteroides
15:000000000-AVD4R:1:2104:22992:15224_1_213_-	0	0	0	0	1	0	0	3	1	0	0
15:000000000-AVD4R:1:2104:23115:17829_1_364_+	6	4	4	3	5	3	7	6	1	6	3	Bacteria	Bacteroidetes	Bacteroidia	Bacteroidales				Pyruvate-flavodoxin oxidoreductase (EC 1.2.7.-)	NifJ family	Pyruvate-flavodoxin oxidoreductase	[C] Energy production and conversion			1.2.7.-
15:000000000-AVD4R:1:2104:23482:5247_1_297_-	1	0	0	0	0	0	0	0	0	0	0	Bacteria	Firmicutes	Clostridia	Clostridiales	Lachnospiraceae	Lachnoclostridium	Lachnoclostridium sp. An196				[G] Carbohydrate transport and metabolism
15:000000000-AVD4R:1:2104:23681:8298_133_359_-	1	0	0	0	0	0	0	0	0	0	0	Bacteria	Firmicutes	Clostridia	Clostridiales							[C] Energy production and conversion
15:000000000-AVD4R:1:2104:23763:4126_1_258_+	0	0	1	1	2	1	1	1	0	1	1	Bacteria	Bacteroidetes	Bacteroidia	Bacteroidales							[C] Energy production and conversion
15:000000000-AVD4R:1:2104:23956:7394_1_68_-	0	0	0	0	0	0	0	1	0	0	0
15:000000000-AVD4R:1:2104:24593:13541_1_300_-	0	0	1	0	0	0	0	0	0	0	0	Bacteria	Bacteroidetes						50S ribosomal protein L5	Universal ribosomal protein uL5 family	Ribosomal protein L5, bacterial-type	[J] Translation, ribosomal structure and biogenesis		K02931
15:000000000-AVD4R:1:2104:24777:14596_1_307_+	1	0	0	0	0	0	0	0	0	0	0
15:000000000-AVD4R:1:2104:24987:14978_1_228_-	0	0	0	1	0	0	0	0	0	1	0	Bacteria	Firmicutes	Clostridia	Clostridiales							[G] Carbohydrate transport and metabolism
15:000000000-AVD4R:1:2104:25776:8370_99_357_-	0	0	0	0	0	0	0	0	1	0	0	Bacteria									Biopolymer transport protein ExbD/TolR
15:000000000-AVD4R:1:2104:26020:8920_1_383_+	0	0	0	1	0	0	0	0	0	0	0	Bacteria
15:000000000-AVD4R:1:2104:27073:14886_1_250_+	0	0	0	0	0	0	0	0	0	0	1	Bacteria	Firmicutes	Clostridia	Clostridiales						Chemotaxis methyl-accepting receptor
15:000000000-AVD4R:1:2104:27474:16295_1_219_-	0	0	0	0	2	0	0	0	0	0	0
15:000000000-AVD4R:1:2104:3318:15459_1_245_+	1	1	1	0	1	1	1	1	1	0	1	Bacteria	Firmicutes	Clostridia	Clostridiales				Uronate isomerase (EC 5.3.1.12) (Glucuronate isomerase) (Uronic isomerase)	Metallo-dependent hydrolases superfamily, Uronate isomerase family	Uronate isomerase	[G] Carbohydrate transport and metabolism	pentose and glucuronate interconversion	K01812	5.3.1.12
15:000000000-AVD4R:1:2104:3590:9747_1_262_+	0	0	0	0	0	0	0	0	0	1	0
15:000000000-AVD4R:1:2104:4758:7803_1_316_+	3	3	0	0	0	4	4	0	3	3	3
15:000000000-AVD4R:1:2104:6299:10076_1_229_-	0	1	0	2	0	0	0	0	0	0	0	Bacteria	Firmicutes	Clostridia	Clostridiales	Ruminococcaceae	Ruminococcus
15:000000000-AVD4R:1:2104:7550:16798_1_264_+	0	0	0	1	0	0	0	0	0	0	0	Bacteria	Firmicutes	Clostridia	Clostridiales	Lachnospiraceae
15:000000000-AVD4R:1:2104:7893:19072_1_245_-	1	3	3	5	8	0	0	0	9	2	1
15:000000000-AVD4R:1:2104:7946:20557_1_303_-	0	0	0	0	0	0	1	0	0	0	0	Bacteria									Alpha-glucan phosphorylase
15:000000000-AVD4R:1:2104:9246:7286_1_374_-	2	1	0	0	0	0	0	0	0	2	2	Bacteria	Firmicutes	Clostridia	Clostridiales			Clostridiales bacterium	NADP-reducing hydrogenase subunit HndD (EC 1.12.1.3) (Hydrogen dehydrogenase (NADP(+)))			[C] Energy production and conversion		K18332	1.12.1.3
15:000000000-AVD4R:1:2104:9336:12585_1_333_-	1	1	0	0	0	1	2	0	0	0	0	Bacteria	Bacteroidetes	Bacteroidia	Bacteroidales	Bacteroidaceae	Bacteroides
15:000000000-AVD4R:1:2104:9735:17308_1_241_-	0	0	0	0	0	2	1	0	0	0	0	Bacteria	Bacteroidetes									[N] Cell motility
15:000000000-AVD4R:1:2105:10051:13738_1_305_-	0	0	1	1	0	0	0	0	0	0	0
15:000000000-AVD4R:1:2105:10296:22414_1_333_-	1	1	0	0	0	0	0	0	1	0	0	Bacteria	Bacteroidetes	Bacteroidia	Bacteroidales						Outer membrane protein SusF/SusE
15:000000000-AVD4R:1:2105:10421:16710_1_255_+	1	0	1	3	0	1	0	0	0	0	0	Bacteria	Bacteroidetes	Bacteroidia	Bacteroidales							[E] Amino acid transport and metabolism
15:000000000-AVD4R:1:2105:10551:10792_1_347_+	0	0	0	1	0	0	0	0	0	0	0
15:000000000-AVD4R:1:2105:10649:21050_1_248_-	1	0	0	0	0	0	0	0	0	0	0
15:000000000-AVD4R:1:2105:11465:5389_1_321_+	0	0	0	0	0	0	0	0	0	0	1	Bacteria	Firmicutes						Methyl-accepting chemotaxis protein 3		Chemotaxis methyl-accepting receptor			K03406
15:000000000-AVD4R:1:2105:12346:21762_1_218_+	0	0	0	0	0	0	0	0	1	0	0	Bacteria	Bacteroidetes	Bacteroidia	Bacteroidales	Prevotellaceae	Prevotella
15:000000000-AVD4R:1:2105:12383:16872_1_249_+	0	0	0	0	0	0	0	1	0	0	0	Bacteria	Firmicutes						3alpha-hydroxy bile acid-CoA-ester 3-dehydrogenase 2 (EC 1.1.1.395) (3alpha-hydroxysteroid dehydrogenase 2) (3alpha-HSDH 2) (Bile acid-inducible protein BaiA2)	Short-chain dehydrogenases/reductases (SDR) family			bile acid biosynthesis		1.1.1.395
15:000000000-AVD4R:1:2105:12572:2756_1_221_+	0	0	0	0	0	0	0	1	0	0	0	Bacteria	Firmicutes	Clostridia	Clostridiales				Uronate isomerase (EC 5.3.1.12) (Glucuronate isomerase) (Uronic isomerase)	Metallo-dependent hydrolases superfamily, Uronate isomerase family	Uronate isomerase	[G] Carbohydrate transport and metabolism	pentose and glucuronate interconversion	K01812	5.3.1.12
15:000000000-AVD4R:1:2105:13321:12399_1_255_-	0	0	0	0	0	0	0	0	0	0	1	Bacteria	Firmicutes	Clostridia	Clostridiales				Formate acetyltransferase (EC 2.3.1.54) (Pyruvate formate-lyase)		Formate acetyltransferase	[C] Energy production and conversion	pyruvate fermentation	K00656	2.3.1.54
15:000000000-AVD4R:1:2105:13465:21000_1_330_-	1	2	2	2	2	2	1	2	2	2	1	Bacteria	Bacteroidetes	Bacteroidia	Bacteroidales				Reverse rubrerythrin-1 (revRbr 1) (NADH peroxidase) (NPXase) (Npx) (EC 1.11.1.1) (Rubperoxin 1) (Rpr 1)			[C] Energy production and conversion			1.11.1.1
15:000000000-AVD4R:1:2105:13926:9585_1_272_-	4	3	0	2	3	1	1	2	0	6	6	Bacteria	Firmicutes	Clostridia	Clostridiales	Oscillospiraceae	Oscillibacter	Oscillibacter sp. ER4
15:000000000-AVD4R:1:2105:14536:15381_1_301_+	0	0	0	0	1	0	0	0	0	0	0	Bacteria	Firmicutes	Clostridia	Clostridiales
15:000000000-AVD4R:1:2105:15028:19270_1_291_+	1	1	0	0	0	0	0	1	0	2	5	Bacteria	Firmicutes						Acetyl-CoA acetyltransferase (EC 2.3.1.9) (Acetoacetyl-CoA thiolase)	Thiolase family		[I] Lipid transport and metabolism	(R)-mevalonate biosynthesis		2.3.1.9
15:000000000-AVD4R:1:2105:15121:3711_1_352_+	4	2	3	4	3	4	5	4	1	5	5	Bacteria	Firmicutes	Bacilli	Lactobacillales	Lactobacillaceae	Lactobacillus	Lactobacillus murinus			Ferredoxin 2Fe-2S type, proteobacteria
15:000000000-AVD4R:1:2105:15250:7469_1_306_+	0	0	0	0	0	0	0	0	0	0	1	Bacteria	Firmicutes	Clostridia	Clostridiales				Glutaconyl-CoA decarboxylase subunit gamma (EC 4.1.1.70) (Biotin carrier)			[I] Lipid transport and metabolism	L-glutamate degradation via hydroxyglutarate pathway	K01615	4.1.1.70
15:000000000-AVD4R:1:2105:15479:4775_1_326_-	0	0	0	0	0	1	0	0	1	0	0	Bacteria	Bacteroidetes	Bacteroidia	Bacteroidales	Bacteroidaceae	Bacteroides	Bacteroides sp. CAG:927
15:000000000-AVD4R:1:2105:15975:7988_1_284_-	0	0	0	0	1	2	2	1	0	0	0	Bacteria	Bacteroidetes	Bacteroidia	Bacteroidales			Bacteroidales bacterium 52_46			Glycoside hydrolase, family 13	[G] Carbohydrate transport and metabolism
15:000000000-AVD4R:1:2105:16172:17336_1_232_-	0	0	1	0	1	0	0	0	0	0	0	Eukaryota	Chordata	Mammalia	Rodentia	Muridae	Rattus	Rattus norvegicus				[U] Intracellular trafficking, secretion, and vesicular transport
15:000000000-AVD4R:1:2105:16184:11734_1_336_+	0	0	0	0	0	0	0	1	0	0	0	Bacteria	Firmicutes	Clostridia	Clostridiales							[G] Carbohydrate transport and metabolism
15:000000000-AVD4R:1:2105:16233:13752_1_222_+	0	0	0	0	1	0	0	0	0	0	0
15:000000000-AVD4R:1:2105:16431:5408_1_250_-	0	0	0	0	1	1	1	1	0	0	0	Bacteria	Bacteroidetes	Bacteroidia								[P] Inorganic ion transport and metabolism
15:000000000-AVD4R:1:2105:17150:5050_1_322_+	2	2	1	1	1	1	1	1	0	2	0	Bacteria	Bacteroidetes	Bacteroidia
15:000000000-AVD4R:1:2105:17185:7122_1_259_+	0	3	2	5	0	4	2	2	0	0	3	Bacteria	Firmicutes								Flagellin	[N] Cell motility
15:000000000-AVD4R:1:2105:17351:14723_1_246_-	0	0	0	0	0	0	0	0	0	1	0	Bacteria	Bacteroidetes	Bacteroidia	Bacteroidales			Bacteroidales bacterium 52_46
15:000000000-AVD4R:1:2105:17589:6019_1_360_-	0	2	0	1	2	4	3	0	0	2	0	Bacteria	Bacteroidetes	Bacteroidia	Bacteroidales				Elongation factor Tu (EF-Tu)	TRAFAC class translation factor GTPase superfamily, Classic translation factor GTPase family, EF-Tu/EF-1A subfamily	Translation elongation factor EFTu/EF1A, bacterial/organelle	[J] Translation, ribosomal structure and biogenesis		K02358
15:000000000-AVD4R:1:2105:17631:14191_22_311_-	0	1	4	6	1	6	3	0	0	0	0	Bacteria	Bacteroidetes	Bacteroidia	Bacteroidales							[M] Cell wall/membrane/envelope biogenesis
15:000000000-AVD4R:1:2105:18449:19892_1_228_-	0	0	0	0	0	0	0	0	1	0	0	Bacteria	Bacteroidetes	Bacteroidia	Bacteroidales				Xylose isomerase (EC 5.3.1.5)	Xylose isomerase family	Xylose isomerase, bacterial-type	[G] Carbohydrate transport and metabolism		K01805	5.3.1.5
15:000000000-AVD4R:1:2105:19057:9000_1_340_-	0	1	0	0	0	0	0	1	0	0	0
15:000000000-AVD4R:1:2105:19147:13770_1_371_+	0	1	0	1	1	0	0	1	1	0	0	Bacteria	Firmicutes						Multiple sugar-binding periplasmic protein SbpA (Sugar-binding protein A)	Bacterial solute-binding protein 2 family		[G] Carbohydrate transport and metabolism
15:000000000-AVD4R:1:2105:19197:20854_1_275_-	10	5	7	7	0	3	2	7	0	0	0	Bacteria	Firmicutes	Clostridia	Clostridiales	Lachnospiraceae		Lachnospiraceae bacterium COE1			Flagellin
15:000000000-AVD4R:1:2105:19494:5349_1_353_+	1	0	0	0	0	0	0	1	0	1	2	Bacteria	Firmicutes	Clostridia	Clostridiales	Clostridiaceae	Clostridium	Clostridium sp. CAG:58	Glutathione-binding protein GsiB	Bacterial solute-binding protein 5 family	Peptide/nickel binding protein, MppA-type	[E] Amino acid transport and metabolism		K13889
15:000000000-AVD4R:1:2105:20041:23632_24_267_-	1	0	1	0	1	2	1	2	1	1	1	Bacteria	Bacteroidetes						Thioredoxin (Trx)	Thioredoxin family	Thioredoxin	[O] Posttranslational modification, protein turnover, chaperones		K03671
15:000000000-AVD4R:1:2105:20276:18512_1_288_-	0	0	0	0	0	0	0	0	0	0	1
15:000000000-AVD4R:1:2105:20519:19236_47_253_+	0	0	0	0	1	0	1	0	0	0	0	Bacteria	Bacteroidetes	Bacteroidia	Bacteroidales	Tannerellaceae	Parabacteroides
15:000000000-AVD4R:1:2105:20614:18858_1_367_+	0	0	1	0	0	0	0	0	0	0	0	Bacteria	Bacteroidetes	Bacteroidia					Glucose-6-phosphate isomerase (GPI) (EC 5.3.1.9) (Phosphoglucose isomerase) (PGI) (Phosphohexose isomerase) (PHI)	GPI family	Phosphoglucose isomerase (PGI)	[G] Carbohydrate transport and metabolism	glycolysis	K01810	5.3.1.9
15:000000000-AVD4R:1:2105:20715:17950_1_346_-	0	1	0	1	1	1	1	0	0	1	0	Bacteria	Bacteroidetes	Bacteroidia	Bacteroidales
15:000000000-AVD4R:1:2105:20964:6900_1_303_+	0	1	0	0	1	1	0	1	0	0	0	Bacteria	Bacteroidetes	Bacteroidia	Bacteroidales							[P] Inorganic ion transport and metabolism
15:000000000-AVD4R:1:2105:21246:18248_1_246_-	0	0	0	0	0	1	1	1	0	0	0
15:000000000-AVD4R:1:2105:21284:14891_1_266_+	0	0	0	0	0	0	0	0	0	1	1
15:000000000-AVD4R:1:2105:21765:15830_1_318_+	0	0	0	0	0	2	2	2	0	0	0	Bacteria
15:000000000-AVD4R:1:2105:21864:15885_1_206_+	1	2	0	0	0	0	0	0	0	0	0
15:000000000-AVD4R:1:2105:22064:21493_1_336_-	0	0	1	0	0	0	0	0	0	1	1	Bacteria	Bacteroidetes	Bacteroidia	Bacteroidales							[P] Inorganic ion transport and metabolism
15:000000000-AVD4R:1:2105:22371:23242_1_211_+	0	0	0	2	0	0	1	2	0	2	2
15:000000000-AVD4R:1:2105:23410:4622_1_338_+	0	0	0	1	1	0	0	0	0	0	0
15:000000000-AVD4R:1:2105:24017:17674_1_288_-	0	0	0	0	0	0	0	0	1	0	0
15:000000000-AVD4R:1:2105:24302:3096_1_307_+	0	0	0	0	0	0	0	0	1	0	0
15:000000000-AVD4R:1:2105:24469:11716_1_302_+	1	2	2	1	2	4	1	3	0	2	2	Bacteria	Bacteroidetes	Bacteroidia	Bacteroidales	Prevotellaceae	Prevotella	Prevotella ruminicola				[P] Inorganic ion transport and metabolism
15:000000000-AVD4R:1:2105:24552:12032_1_349_+	2	1	0	1	0	0	0	0	0	2	2	Bacteria	Firmicutes					Firmicutes bacterium CAG:882				[G] Carbohydrate transport and metabolism
15:000000000-AVD4R:1:2105:24633:11684_1_234_-	0	0	0	0	0	1	1	0	0	0	0	Bacteria	Bacteroidetes	Bacteroidia	Bacteroidales	Prevotellaceae	Prevotella	Prevotella sp. CAG:485			Biopolymer transport protein ExbD/TolR	[P] Inorganic ion transport and metabolism
15:000000000-AVD4R:1:2105:25083:11577_1_129_+	0	0	1	1	1	1	1	1	2	0	0	Bacteria	Firmicutes						50S ribosomal protein L7/L12	Bacterial ribosomal protein bL12 family	Ribosomal protein L7/L12	[J] Translation, ribosomal structure and biogenesis		K02935
[truncated: 23,932 more rows]

## Sheet: family
family	BB_01	BB_02	BB_03	BB_04	SB_01	SB_02	SB_03	SB_04	chow_02	chow_03	chow_04	BB_01	BB_02	BB_03	BB_04	SB_01	SB_02	SB_03	SB_04	chow_02	chow_03	chow_04
[truncated: 121 more rows]

## Sheet: genus
genus	BB_01	BB_02	BB_03	BB_04	SB_01	SB_02	SB_03	SB_04	chow_02	chow_03	chow_04	BB_01	BB_02	BB_03	BB_04	SB_01	SB_02	SB_03	SB_04	chow_02	chow_03	chow_04
[truncated: 246 more rows]

[truncated: 8 more sheets: function+family, function+genus, differential families, differential genera, differential functions+families, differential functions+genera, host proteins - stool, host proteins - liver]
